# Supplementary material for: Discovery of DNA Viruses in Wild-Caught Mosquitoes Using Small RNA High throughput Sequencing
Source: PLOS journal article supplement (doi:10.1371/journal.pone.0024758), 2011-09-20
Supplement: S1 (10.1371/journal.pone.0024758.s001) [file journal.pone.0024758.s001]

AS 1 4482

CO NC_011317 4139 4482 1 U
AGTATTATTCCGTGATACGGATACTGTAAGATACAGATGTAATACATCGTTTCTAATAGA
AACTGTATCTTACAGTATCCGTATCACGGAATAATACTTTTTATATGGATTATGGACTTA
TATCAAATTCCTATATGGATCACTGGAGGTGGAAAATAAGAGAAAAACATAAGGTGGAAA
TTAAGCTTATTCTCCACACACAAATACAACCTTAATTTCCACTACCACATGGTCCACCCC
TATGGATCACTGGAGGTGGAAAATAAGAAAAAAACATAAGGTGGAAATTAAGCTTATTCT
CCACACACAAATACAACCTTAATTTCCACTACCACATGGTCCACCCCTATATAAGGAGTA
CAAAAGGAGAGGCGAATTGAGTGATGAATTCAGTCTGCGATGAACATTCGCCGTGTGAAC
ACGGAAACTTATATTGTGAGTGCATATACTGTTGGGAACATGACGGACAGTGCAGGGGGA
AAAAACTGGATTTGGGAGAATCAACTGGAATCGAAGGAAGATTGGCCAACGATAACCAAC
AACCAGGGCTCTCAGATTCATATTGCACCGAGACAATACATCTTGCAACTGCAGTTCAAC
CGGAAAGGAGAGTCATCGATCGAGAAGATTACGTCAAGAATTTCGCTGGTCAAACCGTTG
GTGACCTCTACCCACAATTACAAGGCAGCACCGGAGCCTCTGAACCAATTGATTTCGCAT
TTCCAACTGTTGGCTCAGGAAGCTGGGAAATACTTGTACGTGAATCTCACAAACATTTCG
AGCCAAATAATTCGGAAGAAGCTTATCAATCACATATTAGAAGTGTACGAAGACGATTAT
TCCCCGAAGAAACTATGGATAATAACGGGTCACAGGCAAGCACGACCGAAATGTTACGAA
ACGCTGTCGAAAGATGCGGTTTTGAAGGCCCTCCTAACAGCCCAAGCGAAAATAACAGAG
ATGGAGTTGATGGAACGTGTATATCAACCGTGGAATTACACAGCAATTGTATTGTTAACG
CACATTGCCCAAAACAAGGACCAAGCAATCAAACCAATAAGAGAAAGAAATCAACCGATA
CAACAGAATCAAGCGGATCCAAAAAAAATAAAAGCAGCAATAATCAACAAAATATACAAG
AACAAGGCAGTTCCAGCATCACCGACAATATCGATCTCGTCGACGGAGAGTTGGATGGAT
CAATTGGATCGAATCGAGAAACAGCATACTACACATTCGTCCTCCACAAAGACAACGTTA
AAGAGGACTGGAGATACATCGCCACAACCAGGGCCAAGCAAGCGCCGAGTTTCATCACAT
TCGATCACGGAGACCACATCCATATCCTCTTCTCCTCGTCCAATACAGGAGGAAACAGCA
CAAGAGTCAGAACCAGAATCACCAAGTTTCTTAGTGCGACAAGCGCAGGAAGTGCAGAAG
CGACTATCACTTTTTCCAAAGTTAAATTTCTCAGGAACTTCATTCTCTATTGCATCCGTT
ACGGTATCGAAACAGTCAATATCTATGGAAATAAAATCCAACAACAATTAACCGAAGCAA
TGGATACATTTAAAATATTATTTGAAAATAGAGACCCAAATGACGTAATATTAGAAGCCG
GATGCAAACTATATCATGAAGAAAAAAAGGATAATAAACAAAAAAGATGCGGACAACGTA
AACAACAAAATCTAACGGAAATTATATTGGAAAAAATTAAAGAAAAGAAAATAACAACGG
CACAGCAATGGGAAAATCAAATTGAACCTGAATTCAAAATACAATTAATAAAAGAGTTTG
GATTAAATGTAGACAGTTATGTAACAAGAATAGTACGCATCGAGAGGACACGTATACAAC
AGTTGATAAAAGCAAAAACGCTTACGGAAATAATGCTTGAAACATTAAATGATGACTATA
TTAAACACTTCACACCAGGAGAAGACAACAGTAAAACAACAAAATGTATTGAATGGATAG
AATATCTATTCAAAGAAAATAACATTAATATAATCCACTTCTTGGCATGGAATGAAATTA
TAAAAACAAAAAGGTATAAAAAAATAAATGGAATGGTACTAGAGGGCATCACAAATGCAG
GAAAATCACTAATATTGGATAACTTATTGGCCATGGTAAAACCAGAAGAAATACCACGAG
AACGAGACAACAGTGGATTCCACCTTGACCAAGTACCAGGAGCAGGATCGATCCTATTTG
AAGAACCAATGATCACACCAGTAAACGTCGGAACATGGAAATTATTACTAGAAGGAAAAA
CCATAAAAACAGATGTGAAAAATAAAGACAAAGAGCCGATAGAACGCACACCAACGTGGA
TCACAACAGCAACTCCAATTACAAATAACATTGATATGAATGAGACATCACAAATACTAC
AAAGAATAAAATTATATATATTCAAAAAAAGTATCCAACACAGAGACGACAAATATACTA
TAAATGCGCAAATTCAAAATAAATTGATCAGTCGTCCTCCAACTCTCATTGAGCCAATAC
ATATGGCCATAGTGTTTATAAAAAATTTCACAAAAATATATAATCTAATCGCAGAAGAAG
ACAAGGCACACACAGTGAATGAAAAGGCAATACAAATAAGCAACGAAGTGAAAGAAGAAG
CAGAATTATGGCAGACAGCACTTCAATGGACCATGATGGAGAACAACGAGGAACAAAACG
AAAACGAGGCGCAGAAGGATCAGGTGCAGGAATCGGAAAAGGAAATAGCAACTCCGTAAA
AGAAGGATATGGACCAAATATGACCGAAATGATCCCAAGAAATATTATGAACAAAGGAAA
TCATACGGTACTTCATACAGTAAAGCAGCAAAAATACTTGGACTTCAATTTCGTATCGAA
TCAAAACCCATACATTATACCATATCAAACGGCAGGATTCTGGGCATCAATGTGGGACCA
AGGAGAAATCGAATCAAACAACACCATCAATATCATGAAAGCACTAAATAGAGTAGCTCT
TGGAGTAACATGGATCAAAGGAGAAATCACATTCGAAGTATATTCAGTAACCAGACAACG
CTTGCTAACGGGAACGACAAACCAAACTACATGGGACTTTGAAACAAGTCAAAACATGTT
CATCGCAGACGCAGACAGAGAACCAGAAAACTTCGGATTAACATCAGCAGCAGCAACTGG
TCCACTTGCTCAACAAACAACACAAACACTACTATTCAACAAAAACAACGACAGATACAC
AAAATATGAATTACCACAAAGAAATCAATATACAAGGGAAATCAACTTCCAAAAACTAAC
AAACAACTATATGTGGAGACCAACGGACATCAACGAAGAAGCAAACTTTAGAAGACTGAT
CCCAATGTCGGAAGGAGTATATACATCATCAAACGCAAATAGTAAAGCGTCAGAATTAAC
ACAACAAAATTCAGCATGGGCTACATCAGGAAAAACAACACAAGGAACACTATTCAGAAA
TAGAACATCATATCCAAGAATGCATGTAGCACAACCACAAGTTCCAGATGAAACCGGATA
CATGAAGTTCAGATACCAAGTACGAATGAGCACAAAATTATACCTAGAATTTCATCTCTA
CCCAGATTATGGATCATCAACAAACATGGAATATATGCAAAGACAAGTACTGGAATTACC
AGAAGTCACTGCAAGAGGAGGAGTAGTAACATGTATGCCGTATGAAATCAAAACTTAAAT
ATTTTAATCAACATGTATCAACTATAACACATATATAATCAATAAAGCATTCAAAAAAGT
ATACAAGTCCAAGTCCAATTAATATATATCACAATAAAAATCCACATTAAAATATAAGCT
TAATTTCCACCTCCGTAGTCCACCTCAGAATATTGGCTTAATTTCCACCTCCGTAGTCCA
CCTCAGAATATTGGCTTAAATTCCACCTCCGATGATACAGTTAAGAAGCCAACATTAGTC
CGGGATCCCCGTGTGAGCCGATAGGCGAGGATCGAAAGCCCAAATTTTGCTGACGTCACC
TCACACACATACCAAAAGCTTTAGTTTCTAATAGAAACAGCGTATTACGCTTAAAGCTTT
TGGTATGTGTGTGAGGTGACGTCAGCAAAATTTGGGCTTTCGATCCTCGCCTATCGGCT

BQ
 50 50 50 50 50 50 50 50 50 50 50 50 50 50 50 50 50 50 50 50 50 50 50 50 50 50 50 50 50 50 50 50 50 50 50 50 50 50 50 50 50 50 50 50 50 50 50 50 50 50 50 50 50 50 50 50 50 50 50 50
 50 50 50 50 50 50 50 50 50 50 50 50 50 50 50 50 50 50 50 50 50 50 50 50 50 50 50 50 50 50 50 50 50 50 50 50 50 50 50 50 50 50 50 50 50 50 50 50 50 50 50 50 50 50 50 50 50 50 50 50
 50 50 50 50 50 50 50 50 50 50 50 50 50 50 50 50 50 50 50 50 50 50 50 50 50 50 50 50 50 50 50 50 50 50 50 50 50 50 50 50 50 50 50 50 50 50 50 50 50 50 50 50 50 50 50 50 50 50 50 50
 50 50 50 50 50 50 50 50 50 50 50 50 50 50 50 50 50 50 50 50 50 50 50 50 50 50 50 50 50 50 50 50 50 50 50 50 50 50 50 50 50 50 50 50 50 50 50 50 50 50 50 50 50 50 50 50 50 50 50 50
 50 50 50 50 50 50 50 50 50 50 50 50 50 50 50 50 50 50 50 50 50 50 50 50 50 50 50 50 50 50 50 50 50 50 50 50 50 50 50 50 50 50 50 50 50 50 50 50 50 50 50 50 50 50 50 50 50 50 50 50
 50 50 50 50 50 50 50 50 50 50 50 50 50 50 50 50 50 50 50 50 50 50 50 50 50 50 50 50 50 50 50 50 50 50 50 50 50 50 50 50 50 50 50 50 50 50 50 50 50 50 50 50 50 50 50 50 50 50 50 50
 50 50 50 50 50 50 50 50 50 50 50 50 50 50 50 50 50 50 50 50 50 50 50 50 50 50 50 50 50 50 50 50 50 50 50 50 50 50 50 50 50 50 50 50 50 50 50 50 50 50 50 50 50 50 50 50 50 50 50 50
 50 50 50 50 50 50 50 50 50 50 50 50 50 50 50 50 50 50 50 50 50 50 50 50 50 50 50 50 50 50 50 50 50 50 50 50 50 50 50 50 50 50 50 50 50 50 50 50 50 50 50 50 50 50 50 50 50 50 50 50
 50 50 50 50 50 50 50 50 50 50 50 50 50 50 50 50 50 50 50 50 50 50 50 50 50 50 50 50 50 50 50 50 50 50 50 50 50 50 50 50 50 50 50 50 50 50 50 50 50 50 50 50 50 50 50 50 50 50 50 50
 50 50 50 50 50 50 50 50 50 50 50 50 50 50 50 50 50 50 50 50 50 50 50 50 50 50 50 50 50 50 50 50 50 50 50 50 50 50 50 50 50 50 50 50 50 50 50 50 50 50 50 50 50 50 50 50 50 50 50 50
 50 50 50 50 50 50 50 50 50 50 50 50 50 50 50 50 50 50 50 50 50 50 50 50 50 50 50 50 50 50 50 50 50 50 50 50 50 50 50 50 50 50 50 50 50 50 50 50 50 50 50 50 50 50 50 50 50 50 50 50
 50 50 50 50 50 50 50 50 50 50 50 50 50 50 50 50 50 50 50 50 50 50 50 50 50 50 50 50 50 50 50 50 50 50 50 50 50 50 50 50 50 50 50 50 50 50 50 50 50 50 50 50 50 50 50 50 50 50 50 50
 50 50 50 50 50 50 50 50 50 50 50 50 50 50 50 50 50 50 50 50 50 50 50 50 50 50 50 50 50 50 50 50 50 50 50 50 50 50 50 50 50 50 50 50 50 50 50 50 50 50 50 50 50 50 50 50 50 50 50 50
 50 50 50 50 50 50 50 50 50 50 50 50 50 50 50 50 50 50 50 50 50 50 50 50 50 50 50 50 50 50 50 50 50 50 50 50 50 50 50 50 50 50 50 50 50 50 50 50 50 50 50 50 50 50 50 50 50 50 50 50
 50 50 50 50 50 50 50 50 50 50 50 50 50 50 50 50 50 50 50 50 50 50 50 50 50 50 50 50 50 50 50 50 50 50 50 50 50 50 50 50 50 50 50 50 50 50 50 50 50 50 50 50 50 50 50 50 50 50 50 50
 50 50 50 50 50 50 50 50 50 50 50 50 50 50 50 50 50 50 50 50 50 50 50 50 50 50 50 50 50 50 50 50 50 50 50 50 50 50 50 50 50 50 50 50 50 50 50 50 50 50 50 50 50 50 50 50 50 50 50 50
 50 50 50 50 50 50 50 50 50 50 50 50 50 50 50 50 50 50 50 50 50 50 50 50 50 50 50 50 50 50 50 50 50 50 50 50 50 50 50 50 50 50 50 50 50 50 50 50 50 50 50 50 50 50 50 50 50 50 50 50
 50 50 50 50 50 50 50 50 50 50 50 50 50 50 50 50 50 50 50 50 50 50 50 50 50 50 50 50 50 50 50 50 50 50 50 50 50 50 50 50 50 50 50 50 50 50 50 50 50 50 50 50 50 50 50 50 50 50 50 50
 50 50 50 50 50 50 50 50 50 50 50 50 50 50 50 50 50 50 50 50 50 50 50 50 50 50 50 50 50 50 50 50 50 50 50 50 50 50 50 50 50 50 50 50 50 50 50 50 50 50 50 50 50 50 50 50 50 50 50 50
 50 50 50 50 50 50 50 50 50 50 50 50 50 50 50 50 50 50 50 50 50 50 50 50 50 50 50 50 50 50 50 50 50 50 50 50 50 50 50 50 50 50 50 50 50 50 50 50 50 50 50 50 50 50 50 50 50 50 50 50
 50 50 50 50 50 50 50 50 50 50 50 50 50 50 50 50 50 50 50 50 50 50 50 50 50 50 50 50 50 50 50 50 50 50 50 50 50 50 50 50 50 50 50 50 50 50 50 50 50 50 50 50 50 50 50 50 50 50 50 50
 50 50 50 50 50 50 50 50 50 50 50 50 50 50 50 50 50 50 50 50 50 50 50 50 50 50 50 50 50 50 50 50 50 50 50 50 50 50 50 50 50 50 50 50 50 50 50 50 50 50 50 50 50 50 50 50 50 50 50 50
 50 50 50 50 50 50 50 50 50 50 50 50 50 50 50 50 50 50 50 50 50 50 50 50 50 50 50 50 50 50 50 50 50 50 50 50 50 50 50 50 50 50 50 50 50 50 50 50 50 50 50 50 50 50 50 50 50 50 50 50
 50 50 50 50 50 50 50 50 50 50 50 50 50 50 50 50 50 50 50 50 50 50 50 50 50 50 50 50 50 50 50 50 50 50 50 50 50 50 50 50 50 50 50 50 50 50 50 50 50 50 50 50 50 50 50 50 50 50 50 50
 50 50 50 50 50 50 50 50 50 50 50 50 50 50 50 50 50 50 50 50 50 50 50 50 50 50 50 50 50 50 50 50 50 50 50 50 50 50 50 50 50 50 50 50 50 50 50 50 50 50 50 50 50 50 50 50 50 50 50 50
 50 50 50 50 50 50 50 50 50 50 50 50 50 50 50 50 50 50 50 50 50 50 50 50 50 50 50 50 50 50 50 50 50 50 50 50 50 50 50 50 50 50 50 50 50 50 50 50 50 50 50 50 50 50 50 50 50 50 50 50
 50 50 50 50 50 50 50 50 50 50 50 50 50 50 50 50 50 50 50 50 50 50 50 50 50 50 50 50 50 50 50 50 50 50 50 50 50 50 50 50 50 50 50 50 50 50 50 50 50 50 50 50 50 50 50 50 50 50 50 50
 50 50 50 50 50 50 50 50 50 50 50 50 50 50 50 50 50 50 50 50 50 50 50 50 50 50 50 50 50 50 50 50 50 50 50 50 50 50 50 50 50 50 50 50 50 50 50 50 50 50 50 50 50 50 50 50 50 50 50 50
 50 50 50 50 50 50 50 50 50 50 50 50 50 50 50 50 50 50 50 50 50 50 50 50 50 50 50 50 50 50 50 50 50 50 50 50 50 50 50 50 50 50 50 50 50 50 50 50 50 50 50 50 50 50 50 50 50 50 50 50
 50 50 50 50 50 50 50 50 50 50 50 50 50 50 50 50 50 50 50 50 50 50 50 50 50 50 50 50 50 50 50 50 50 50 50 50 50 50 50 50 50 50 50 50 50 50 50 50 50 50 50 50 50 50 50 50 50 50 50 50
 50 50 50 50 50 50 50 50 50 50 50 50 50 50 50 50 50 50 50 50 50 50 50 50 50 50 50 50 50 50 50 50 50 50 50 50 50 50 50 50 50 50 50 50 50 50 50 50 50 50 50 50 50 50 50 50 50 50 50 50
 50 50 50 50 50 50 50 50 50 50 50 50 50 50 50 50 50 50 50 50 50 50 50 50 50 50 50 50 50 50 50 50 50 50 50 50 50 50 50 50 50 50 50 50 50 50 50 50 50 50 50 50 50 50 50 50 50 50 50 50
 50 50 50 50 50 50 50 50 50 50 50 50 50 50 50 50 50 50 50 50 50 50 50 50 50 50 50 50 50 50 50 50 50 50 50 50 50 50 50 50 50 50 50 50 50 50 50 50 50 50 50 50 50 50 50 50 50 50 50 50
 50 50 50 50 50 50 50 50 50 50 50 50 50 50 50 50 50 50 50 50 50 50 50 50 50 50 50 50 50 50 50 50 50 50 50 50 50 50 50 50 50 50 50 50 50 50 50 50 50 50 50 50 50 50 50 50 50 50 50 50
 50 50 50 50 50 50 50 50 50 50 50 50 50 50 50 50 50 50 50 50 50 50 50 50 50 50 50 50 50 50 50 50 50 50 50 50 50 50 50 50 50 50 50 50 50 50 50 50 50 50 50 50 50 50 50 50 50 50 50 50
 50 50 50 50 50 50 50 50 50 50 50 50 50 50 50 50 50 50 50 50 50 50 50 50 50 50 50 50 50 50 50 50 50 50 50 50 50 50 50 50 50 50 50 50 50 50 50 50 50 50 50 50 50 50 50 50 50 50 50 50
 50 50 50 50 50 50 50 50 50 50 50 50 50 50 50 50 50 50 50 50 50 50 50 50 50 50 50 50 50 50 50 50 50 50 50 50 50 50 50 50 50 50 50 50 50 50 50 50 50 50 50 50 50 50 50 50 50 50 50 50
 50 50 50 50 50 50 50 50 50 50 50 50 50 50 50 50 50 50 50 50 50 50 50 50 50 50 50 50 50 50 50 50 50 50 50 50 50 50 50 50 50 50 50 50 50 50 50 50 50 50 50 50 50 50 50 50 50 50 50 50
 50 50 50 50 50 50 50 50 50 50 50 50 50 50 50 50 50 50 50 50 50 50 50 50 50 50 50 50 50 50 50 50 50 50 50 50 50 50 50 50 50 50 50 50 50 50 50 50 50 50 50 50 50 50 50 50 50 50 50 50
 50 50 50 50 50 50 50 50 50 50 50 50 50 50 50 50 50 50 50 50 50 50 50 50 50 50 50 50 50 50 50 50 50 50 50 50 50 50 50 50 50 50 50 50 50 50 50 50 50 50 50 50 50 50 50 50 50 50 50 50
 50 50 50 50 50 50 50 50 50 50 50 50 50 50 50 50 50 50 50 50 50 50 50 50 50 50 50 50 50 50 50 50 50 50 50 50 50 50 50 50 50 50 50 50 50 50 50 50 50 50 50 50 50 50 50 50 50 50 50 50
 50 50 50 50 50 50 50 50 50 50 50 50 50 50 50 50 50 50 50 50 50 50 50 50 50 50 50 50 50 50 50 50 50 50 50 50 50 50 50 50 50 50 50 50 50 50 50 50 50 50 50 50 50 50 50 50 50 50 50 50
 50 50 50 50 50 50 50 50 50 50 50 50 50 50 50 50 50 50 50 50 50 50 50 50 50 50 50 50 50 50 50 50 50 50 50 50 50 50 50 50 50 50 50 50 50 50 50 50 50 50 50 50 50 50 50 50 50 50 50 50
 50 50 50 50 50 50 50 50 50 50 50 50 50 50 50 50 50 50 50 50 50 50 50 50 50 50 50 50 50 50 50 50 50 50 50 50 50 50 50 50 50 50 50 50 50 50 50 50 50 50 50 50 50 50 50 50 50 50 50 50
 50 50 50 50 50 50 50 50 50 50 50 50 50 50 50 50 50 50 50 50 50 50 50 50 50 50 50 50 50 50 50 50 50 50 50 50 50 50 50 50 50 50 50 50 50 50 50 50 50 50 50 50 50 50 50 50 50 50 50 50
 50 50 50 50 50 50 50 50 50 50 50 50 50 50 50 50 50 50 50 50 50 50 50 50 50 50 50 50 50 50 50 50 50 50 50 50 50 50 50 50 50 50 50 50 50 50 50 50 50 50 50 50 50 50 50 50 50 50 50 50
 50 50 50 50 50 50 50 50 50 50 50 50 50 50 50 50 50 50 50 50 50 50 50 50 50 50 50 50 50 50 50 50 50 50 50 50 50 50 50 50 50 50 50 50 50 50 50 50 50 50 50 50 50 50 50 50 50 50 50 50
 50 50 50 50 50 50 50 50 50 50 50 50 50 50 50 50 50 50 50 50 50 50 50 50 50 50 50 50 50 50 50 50 50 50 50 50 50 50 50 50 50 50 50 50 50 50 50 50 50 50 50 50 50 50 50 50 50 50 50 50
 50 50 50 50 50 50 50 50 50 50 50 50 50 50 50 50 50 50 50 50 50 50 50 50 50 50 50 50 50 50 50 50 50 50 50 50 50 50 50 50 50 50 50 50 50 50 50 50 50 50 50 50 50 50 50 50 50 50 50 50
 50 50 50 50 50 50 50 50 50 50 50 50 50 50 50 50 50 50 50 50 50 50 50 50 50 50 50 50 50 50 50 50 50 50 50 50 50 50 50 50 50 50 50 50 50 50 50 50 50 50 50 50 50 50 50 50 50 50 50 50
 50 50 50 50 50 50 50 50 50 50 50 50 50 50 50 50 50 50 50 50 50 50 50 50 50 50 50 50 50 50 50 50 50 50 50 50 50 50 50 50 50 50 50 50 50 50 50 50 50 50 50 50 50 50 50 50 50 50 50 50
 50 50 50 50 50 50 50 50 50 50 50 50 50 50 50 50 50 50 50 50 50 50 50 50 50 50 50 50 50 50 50 50 50 50 50 50 50 50 50 50 50 50 50 50 50 50 50 50 50 50 50 50 50 50 50 50 50 50 50 50
 50 50 50 50 50 50 50 50 50 50 50 50 50 50 50 50 50 50 50 50 50 50 50 50 50 50 50 50 50 50 50 50 50 50 50 50 50 50 50 50 50 50 50 50 50 50 50 50 50 50 50 50 50 50 50 50 50 50 50 50
 50 50 50 50 50 50 50 50 50 50 50 50 50 50 50 50 50 50 50 50 50 50 50 50 50 50 50 50 50 50 50 50 50 50 50 50 50 50 50 50 50 50 50 50 50 50 50 50 50 50 50 50 50 50 50 50 50 50 50 50
 50 50 50 50 50 50 50 50 50 50 50 50 50 50 50 50 50 50 50 50 50 50 50 50 50 50 50 50 50 50 50 50 50 50 50 50 50 50 50 50 50 50 50 50 50 50 50 50 50 50 50 50 50 50 50 50 50 50 50 50
 50 50 50 50 50 50 50 50 50 50 50 50 50 50 50 50 50 50 50 50 50 50 50 50 50 50 50 50 50 50 50 50 50 50 50 50 50 50 50 50 50 50 50 50 50 50 50 50 50 50 50 50 50 50 50 50 50 50 50 50
 50 50 50 50 50 50 50 50 50 50 50 50 50 50 50 50 50 50 50 50 50 50 50 50 50 50 50 50 50 50 50 50 50 50 50 50 50 50 50 50 50 50 50 50 50 50 50 50 50 50 50 50 50 50 50 50 50 50 50 50
 50 50 50 50 50 50 50 50 50 50 50 50 50 50 50 50 50 50 50 50 50 50 50 50 50 50 50 50 50 50 50 50 50 50 50 50 50 50 50 50 50 50 50 50 50 50 50 50 50 50 50 50 50 50 50 50 50 50 50 50
 50 50 50 50 50 50 50 50 50 50 50 50 50 50 50 50 50 50 50 50 50 50 50 50 50 50 50 50 50 50 50 50 50 50 50 50 50 50 50 50 50 50 50 50 50 50 50 50 50 50 50 50 50 50 50 50 50 50 50 50
 50 50 50 50 50 50 50 50 50 50 50 50 50 50 50 50 50 50 50 50 50 50 50 50 50 50 50 50 50 50 50 50 50 50 50 50 50 50 50 50 50 50 50 50 50 50 50 50 50 50 50 50 50 50 50 50 50 50 50 50
 50 50 50 50 50 50 50 50 50 50 50 50 50 50 50 50 50 50 50 50 50 50 50 50 50 50 50 50 50 50 50 50 50 50 50 50 50 50 50 50 50 50 50 50 50 50 50 50 50 50 50 50 50 50 50 50 50 50 50 50
 50 50 50 50 50 50 50 50 50 50 50 50 50 50 50 50 50 50 50 50 50 50 50 50 50 50 50 50 50 50 50 50 50 50 50 50 50 50 50 50 50 50 50 50 50 50 50 50 50 50 50 50 50 50 50 50 50 50 50 50
 50 50 50 50 50 50 50 50 50 50 50 50 50 50 50 50 50 50 50 50 50 50 50 50 50 50 50 50 50 50 50 50 50 50 50 50 50 50 50 50 50 50 50 50 50 50 50 50 50 50 50 50 50 50 50 50 50 50 50 50
 50 50 50 50 50 50 50 50 50 50 50 50 50 50 50 50 50 50 50 50 50 50 50 50 50 50 50 50 50 50 50 50 50 50 50 50 50 50 50 50 50 50 50 50 50 50 50 50 50 50 50 50 50 50 50 50 50 50 50 50
 50 50 50 50 50 50 50 50 50 50 50 50 50 50 50 50 50 50 50 50 50 50 50 50 50 50 50 50 50 50 50 50 50 50 50 50 50 50 50 50 50 50 50 50 50 50 50 50 50 50 50 50 50 50 50 50 50 50 50 50
 50 50 50 50 50 50 50 50 50 50 50 50 50 50 50 50 50 50 50 50 50 50 50 50 50 50 50 50 50 50 50 50 50 50 50 50 50 50 50 50 50 50 50 50 50 50 50 50 50 50 50 50 50 50 50 50 50 50 50 50
 50 50 50 50 50 50 50 50 50 50 50 50 50 50 50 50 50 50 50 50 50 50 50 50 50 50 50 50 50 50 50 50 50 50 50 50 50 50 50 50 50 50 50 50 50 50 50 50 50 50 50 50 50 50 50 50 50 50 50 50
 50 50 50 50 50 50 50 50 50 50 50 50 50 50 50 50 50 50 50 50 50 50 50 50 50 50 50 50 50 50 50 50 50 50 50 50 50 50 50 50 50 50 50 50 50 50 50 50 50 50 50 50 50 50 50 50 50 50 50 50
 50 50 50 50 50 50 50 50 50 50 50 50 50 50 50 50 50 50 50 50 50 50 50 50 50 50 50 50 50 50 50 50 50 50 50 50 50 50 50 50 50 50 50 50 50 50 50 50 50 50 50 50 50 50 50 50 50 50 50

AF NC_011317_pseudo U 1
AF ILLUMINA-E6F4B9:7:5:12408:9546#0/1 C 8
AF ILLUMINA-E6F4B9:7:24:19465:19643#0/1 U 9
AF ILLUMINA-E6F4B9:7:9:9867:6127#0/1 U 10
AF ILLUMINA-E6F4B9:7:71:3414:2818#0/1 U 10
AF ILLUMINA-E6F4B9:7:73:4752:1265#0/1 U 10
AF ILLUMINA-E6F4B9:7:93:13447:1428#0/1 U 10
AF ILLUMINA-E6F4B9:7:22:18632:5104#0/1 U 11
AF ILLUMINA-E6F4B9:7:31:9935:7484#0/1 U 11
AF ILLUMINA-E6F4B9:7:40:3179:3636#0/1 U 11
AF ILLUMINA-E6F4B9:7:69:14561:5507#0/1 U 11
AF ILLUMINA-E6F4B9:7:72:19551:17593#0/1 U 11
AF ILLUMINA-E6F4B9:7:99:7845:11182#0/1 U 11
AF ILLUMINA-E6F4B9:7:112:12121:18969#0/1 U 11
AF ILLUMINA-E6F4B9:7:62:19306:4933#0/1 U 12
AF ILLUMINA-E6F4B9:7:65:11484:18462#0/1 U 12
AF ILLUMINA-E6F4B9:7:68:2815:14306#0/1 U 12
AF ILLUMINA-E6F4B9:7:74:4779:8321#0/1 U 12
AF ILLUMINA-E6F4B9:7:76:16791:14654#0/1 U 12
AF ILLUMINA-E6F4B9:7:80:14645:17191#0/1 U 12
AF ILLUMINA-E6F4B9:7:85:12063:15162#0/1 U 12
AF ILLUMINA-E6F4B9:7:95:1682:5073#0/1 U 12
AF ILLUMINA-E6F4B9:7:3:18178:20724#0/1 U 13
AF ILLUMINA-E6F4B9:7:8:14571:15063#0/1 U 13
AF ILLUMINA-E6F4B9:7:18:1456:13423#0/1 U 13
AF ILLUMINA-E6F4B9:7:19:6950:2488#0/1 U 13
AF ILLUMINA-E6F4B9:7:24:17190:2742#0/1 U 13
AF ILLUMINA-E6F4B9:7:26:7833:1166#0/1 U 13
AF ILLUMINA-E6F4B9:7:31:8098:1109#0/1 U 13
AF ILLUMINA-E6F4B9:7:39:17942:16693#0/1 U 13
AF ILLUMINA-E6F4B9:7:40:5751:9251#0/1 U 13
AF ILLUMINA-E6F4B9:7:48:8054:16021#0/1 U 13
AF ILLUMINA-E6F4B9:7:50:5308:7500#0/1 U 13
AF ILLUMINA-E6F4B9:7:51:16306:8442#0/1 U 13
AF ILLUMINA-E6F4B9:7:52:12272:5087#0/1 U 13
AF ILLUMINA-E6F4B9:7:53:4911:10250#0/1 U 13
AF ILLUMINA-E6F4B9:7:55:1905:5632#0/1 U 13
AF ILLUMINA-E6F4B9:7:57:8240:20453#0/1 U 13
AF ILLUMINA-E6F4B9:7:60:8840:13411#0/1 U 13
AF ILLUMINA-E6F4B9:7:64:2769:7269#0/1 U 13
AF ILLUMINA-E6F4B9:7:66:7543:13686#0/1 U 13
AF ILLUMINA-E6F4B9:7:67:18036:2506#0/1 U 13
AF ILLUMINA-E6F4B9:7:71:3953:13762#0/1 U 13
AF ILLUMINA-E6F4B9:7:72:18758:12418#0/1 U 13
AF ILLUMINA-E6F4B9:7:77:6431:7436#0/1 U 13
AF ILLUMINA-E6F4B9:7:86:13513:7658#0/1 U 13
AF ILLUMINA-E6F4B9:7:86:17421:12049#0/1 U 13
AF ILLUMINA-E6F4B9:7:91:18641:7016#0/1 U 13
AF ILLUMINA-E6F4B9:7:93:2473:2068#0/1 U 13
AF ILLUMINA-E6F4B9:7:94:12181:2771#0/1 U 13
AF ILLUMINA-E6F4B9:7:98:14280:6595#0/1 U 13
AF ILLUMINA-E6F4B9:7:98:2373:18390#0/1 U 13
AF ILLUMINA-E6F4B9:7:101:7824:11916#0/1 U 13
AF ILLUMINA-E6F4B9:7:105:6687:2024#0/1 U 13
AF ILLUMINA-E6F4B9:7:106:17806:2581#0/1 U 13
AF ILLUMINA-E6F4B9:7:106:9817:19571#0/1 U 13
AF ILLUMINA-E6F4B9:7:107:1095:6601#0/1 U 13
AF ILLUMINA-E6F4B9:7:108:3544:5022#0/1 U 13
AF ILLUMINA-E6F4B9:7:116:8399:6152#0/1 U 13
AF ILLUMINA-E6F4B9:7:118:2598:17424#0/1 U 13
AF ILLUMINA-E6F4B9:7:6:8618:20295#0/1 U 14
AF ILLUMINA-E6F4B9:7:20:7759:3172#0/1 U 14
AF ILLUMINA-E6F4B9:7:26:19147:13713#0/1 U 14
AF ILLUMINA-E6F4B9:7:30:11472:8622#0/1 U 14
AF ILLUMINA-E6F4B9:7:31:13493:12778#0/1 U 14
AF ILLUMINA-E6F4B9:7:73:9118:6002#0/1 U 14
AF ILLUMINA-E6F4B9:7:85:14172:16822#0/1 U 14
AF ILLUMINA-E6F4B9:7:86:6667:11022#0/1 U 14
AF ILLUMINA-E6F4B9:7:86:16310:12746#0/1 U 14
AF ILLUMINA-E6F4B9:7:118:19428:13032#0/1 U 14
AF ILLUMINA-E6F4B9:7:4:7719:6625#0/1 U 15
AF ILLUMINA-E6F4B9:7:10:15994:5805#0/1 U 15
AF ILLUMINA-E6F4B9:7:11:11821:1123#0/1 U 15
AF ILLUMINA-E6F4B9:7:11:9036:11261#0/1 U 15
AF ILLUMINA-E6F4B9:7:25:15550:8432#0/1 U 15
AF ILLUMINA-E6F4B9:7:29:11886:19341#0/1 U 15
AF ILLUMINA-E6F4B9:7:34:15213:9516#0/1 U 15
AF ILLUMINA-E6F4B9:7:37:9017:10469#0/1 U 15
AF ILLUMINA-E6F4B9:7:38:2399:11827#0/1 U 15
AF ILLUMINA-E6F4B9:7:40:13904:3397#0/1 U 15
AF ILLUMINA-E6F4B9:7:41:6711:8158#0/1 U 15
AF ILLUMINA-E6F4B9:7:46:2865:7431#0/1 U 15
AF ILLUMINA-E6F4B9:7:47:16618:5981#0/1 U 15
AF ILLUMINA-E6F4B9:7:55:14379:10437#0/1 U 15
AF ILLUMINA-E6F4B9:7:73:4907:16585#0/1 U 15
AF ILLUMINA-E6F4B9:7:75:15877:13454#0/1 U 15
AF ILLUMINA-E6F4B9:7:78:9183:9993#0/1 U 15
AF ILLUMINA-E6F4B9:7:82:19659:4919#0/1 U 15
AF ILLUMINA-E6F4B9:7:82:2406:15279#0/1 U 15
AF ILLUMINA-E6F4B9:7:86:15761:10139#0/1 U 15
AF ILLUMINA-E6F4B9:7:90:8385:16939#0/1 U 15
AF ILLUMINA-E6F4B9:7:90:5621:19438#0/1 U 15
AF ILLUMINA-E6F4B9:7:91:19050:5804#0/1 U 15
AF ILLUMINA-E6F4B9:7:93:18757:6124#0/1 U 15
AF ILLUMINA-E6F4B9:7:97:14944:8737#0/1 U 15
AF ILLUMINA-E6F4B9:7:101:12888:18453#0/1 U 15
AF ILLUMINA-E6F4B9:7:113:19172:4683#0/1 U 15
AF ILLUMINA-E6F4B9:7:115:15259:20927#0/1 U 15
AF ILLUMINA-E6F4B9:7:117:10214:11672#0/1 U 15
AF ILLUMINA-E6F4B9:7:120:18132:15432#0/1 U 15
AF ILLUMINA-E6F4B9:7:78:9575:1410#0/1 U 15
AF ILLUMINA-E6F4B9:7:5:14885:3018#0/1 U 16
AF ILLUMINA-E6F4B9:7:10:3034:4588#0/1 U 16
AF ILLUMINA-E6F4B9:7:12:12142:1524#0/1 U 16
AF ILLUMINA-E6F4B9:7:14:5508:17532#0/1 U 16
AF ILLUMINA-E6F4B9:7:15:18511:1446#0/1 U 16
AF ILLUMINA-E6F4B9:7:16:16170:11713#0/1 U 16
AF ILLUMINA-E6F4B9:7:18:3826:8537#0/1 U 16
AF ILLUMINA-E6F4B9:7:20:3175:20222#0/1 U 16
AF ILLUMINA-E6F4B9:7:25:17027:13260#0/1 U 16
AF ILLUMINA-E6F4B9:7:27:11628:17960#0/1 U 16
AF ILLUMINA-E6F4B9:7:31:3376:20752#0/1 U 16
AF ILLUMINA-E6F4B9:7:35:1973:4214#0/1 U 16
AF ILLUMINA-E6F4B9:7:42:12765:15352#0/1 U 16
AF ILLUMINA-E6F4B9:7:63:2500:13642#0/1 U 16
AF ILLUMINA-E6F4B9:7:64:13862:3060#0/1 U 16
AF ILLUMINA-E6F4B9:7:64:15868:21260#0/1 U 16
AF ILLUMINA-E6F4B9:7:72:14330:6291#0/1 U 16
AF ILLUMINA-E6F4B9:7:73:11313:19119#0/1 U 16
AF ILLUMINA-E6F4B9:7:78:7180:10020#0/1 U 16
AF ILLUMINA-E6F4B9:7:81:12313:1402#0/1 U 16
AF ILLUMINA-E6F4B9:7:84:6776:7030#0/1 U 16
AF ILLUMINA-E6F4B9:7:87:13083:2579#0/1 U 16
AF ILLUMINA-E6F4B9:7:91:1802:5712#0/1 U 16
AF ILLUMINA-E6F4B9:7:104:4219:10756#0/1 U 16
AF ILLUMINA-E6F4B9:7:105:18727:10828#0/1 U 16
AF ILLUMINA-E6F4B9:7:107:14796:5210#0/1 U 16
AF ILLUMINA-E6F4B9:7:107:5768:9209#0/1 U 16
AF ILLUMINA-E6F4B9:7:108:2424:1251#0/1 U 16
AF ILLUMINA-E6F4B9:7:117:6814:20411#0/1 U 16
AF ILLUMINA-E6F4B9:7:118:13986:6214#0/1 U 16
AF ILLUMINA-E6F4B9:7:4:8708:12846#0/1 U 17
AF ILLUMINA-E6F4B9:7:6:3970:4319#0/1 U 17
AF ILLUMINA-E6F4B9:7:83:9400:19986#0/1 C 60
AF ILLUMINA-E6F4B9:7:68:11136:15208#0/1 C 62
AF ILLUMINA-E6F4B9:7:76:1621:1469#0/1 C 62
AF ILLUMINA-E6F4B9:7:12:10794:2845#0/1 C 63
AF ILLUMINA-E6F4B9:7:32:11777:1471#0/1 C 63
AF ILLUMINA-E6F4B9:7:68:16422:3503#0/1 C 63
AF ILLUMINA-E6F4B9:7:86:13666:1402#0/1 C 63
AF ILLUMINA-E6F4B9:7:89:13860:1210#0/1 C 63
AF ILLUMINA-E6F4B9:7:95:10119:4788#0/1 C 63
AF ILLUMINA-E6F4B9:7:114:17615:15607#0/1 C 63
AF ILLUMINA-E6F4B9:7:34:9430:10199#0/1 C 62
AF ILLUMINA-E6F4B9:7:119:15721:9210#0/1 C 62
AF ILLUMINA-E6F4B9:7:2:18070:13913#0/1 C 64
AF ILLUMINA-E6F4B9:7:6:7021:4896#0/1 C 64
AF ILLUMINA-E6F4B9:7:6:2905:17555#0/1 C 64
AF ILLUMINA-E6F4B9:7:7:18322:3488#0/1 C 64
AF ILLUMINA-E6F4B9:7:7:10647:5059#0/1 C 64
AF ILLUMINA-E6F4B9:7:9:16850:1408#0/1 C 64
AF ILLUMINA-E6F4B9:7:9:4887:15554#0/1 C 64
AF ILLUMINA-E6F4B9:7:12:18661:10710#0/1 C 64
AF ILLUMINA-E6F4B9:7:14:17790:17737#0/1 C 64
AF ILLUMINA-E6F4B9:7:21:15055:15485#0/1 C 64
AF ILLUMINA-E6F4B9:7:32:14060:15120#0/1 C 64
AF ILLUMINA-E6F4B9:7:34:2873:7484#0/1 C 64
AF ILLUMINA-E6F4B9:7:39:2900:9156#0/1 C 64
AF ILLUMINA-E6F4B9:7:41:19461:13015#0/1 C 64
AF ILLUMINA-E6F4B9:7:41:16191:18088#0/1 C 64
AF ILLUMINA-E6F4B9:7:49:12680:14700#0/1 C 64
AF ILLUMINA-E6F4B9:7:50:1883:3692#0/1 C 64
AF ILLUMINA-E6F4B9:7:62:13112:7463#0/1 C 64
AF ILLUMINA-E6F4B9:7:63:2682:13960#0/1 C 64
AF ILLUMINA-E6F4B9:7:64:1460:20970#0/1 C 64
AF ILLUMINA-E6F4B9:7:67:19026:17800#0/1 C 64
AF ILLUMINA-E6F4B9:7:68:16315:12168#0/1 C 64
AF ILLUMINA-E6F4B9:7:69:11925:17828#0/1 C 64
AF ILLUMINA-E6F4B9:7:70:5619:14095#0/1 C 64
AF ILLUMINA-E6F4B9:7:75:4408:14730#0/1 C 64
AF ILLUMINA-E6F4B9:7:78:8507:9176#0/1 C 64
AF ILLUMINA-E6F4B9:7:87:11682:16096#0/1 C 64
AF ILLUMINA-E6F4B9:7:87:13736:21126#0/1 C 64
AF ILLUMINA-E6F4B9:7:88:5098:5477#0/1 C 64
AF ILLUMINA-E6F4B9:7:88:17280:12338#0/1 C 64
AF ILLUMINA-E6F4B9:7:90:6217:6301#0/1 C 64
AF ILLUMINA-E6F4B9:7:90:5659:19304#0/1 C 64
AF ILLUMINA-E6F4B9:7:91:3581:20671#0/1 C 64
AF ILLUMINA-E6F4B9:7:94:5552:3189#0/1 C 64
AF ILLUMINA-E6F4B9:7:108:19777:19329#0/1 C 64
AF ILLUMINA-E6F4B9:7:112:18862:19016#0/1 C 64
AF ILLUMINA-E6F4B9:7:114:17804:20623#0/1 C 64
AF ILLUMINA-E6F4B9:7:117:15223:16456#0/1 C 64
AF ILLUMINA-E6F4B9:7:119:19595:7010#0/1 C 64
AF ILLUMINA-E6F4B9:7:119:15317:10487#0/1 C 64
AF ILLUMINA-E6F4B9:7:27:5500:3859#0/1 C 62
AF ILLUMINA-E6F4B9:7:82:16721:5751#0/1 C 63
AF ILLUMINA-E6F4B9:7:9:13264:11949#0/1 C 65
AF ILLUMINA-E6F4B9:7:13:9464:19321#0/1 C 65
AF ILLUMINA-E6F4B9:7:27:10108:3547#0/1 C 65
AF ILLUMINA-E6F4B9:7:32:9179:10384#0/1 C 65
AF ILLUMINA-E6F4B9:7:35:9545:18530#0/1 C 65
AF ILLUMINA-E6F4B9:7:39:18655:3143#0/1 C 65
AF ILLUMINA-E6F4B9:7:60:9378:3222#0/1 C 65
AF ILLUMINA-E6F4B9:7:62:8646:10614#0/1 C 65
AF ILLUMINA-E6F4B9:7:64:3352:2202#0/1 C 65
AF ILLUMINA-E6F4B9:7:67:1613:4912#0/1 C 65
AF ILLUMINA-E6F4B9:7:67:18526:7966#0/1 C 65
AF ILLUMINA-E6F4B9:7:67:10786:15530#0/1 C 65
AF ILLUMINA-E6F4B9:7:74:18181:15987#0/1 C 65
AF ILLUMINA-E6F4B9:7:75:18830:9605#0/1 C 65
AF ILLUMINA-E6F4B9:7:88:9498:6813#0/1 C 65
AF ILLUMINA-E6F4B9:7:96:3040:8830#0/1 C 65
AF ILLUMINA-E6F4B9:7:104:18922:8295#0/1 C 65
AF ILLUMINA-E6F4B9:7:117:14434:17627#0/1 C 65
AF ILLUMINA-E6F4B9:7:118:19310:18429#0/1 C 65
AF ILLUMINA-E6F4B9:7:120:11766:10789#0/1 C 65
AF ILLUMINA-E6F4B9:7:120:16077:14114#0/1 C 65
AF ILLUMINA-E6F4B9:7:103:2165:21311#0/1 C 64
AF ILLUMINA-E6F4B9:7:15:6922:9384#0/1 C 66
AF ILLUMINA-E6F4B9:7:23:3112:19095#0/1 C 66
AF ILLUMINA-E6F4B9:7:32:6780:3560#0/1 C 66
AF ILLUMINA-E6F4B9:7:38:4686:1087#0/1 C 66
AF ILLUMINA-E6F4B9:7:42:1787:14611#0/1 C 66
AF ILLUMINA-E6F4B9:7:54:3059:19183#0/1 C 66
AF ILLUMINA-E6F4B9:7:80:16440:17425#0/1 C 66
AF ILLUMINA-E6F4B9:7:105:8255:5767#0/1 C 66
AF ILLUMINA-E6F4B9:7:112:8498:15789#0/1 C 66
AF ILLUMINA-E6F4B9:7:117:10091:16106#0/1 C 66
AF ILLUMINA-E6F4B9:7:118:9686:9383#0/1 C 66
AF ILLUMINA-E6F4B9:7:65:8867:6387#0/1 C 65
AF ILLUMINA-E6F4B9:7:6:4842:11593#0/1 C 67
AF ILLUMINA-E6F4B9:7:15:13912:3210#0/1 C 67
AF ILLUMINA-E6F4B9:7:17:10024:3938#0/1 C 67
AF ILLUMINA-E6F4B9:7:20:6413:2387#0/1 C 67
AF ILLUMINA-E6F4B9:7:28:15344:13944#0/1 C 67
AF ILLUMINA-E6F4B9:7:33:19552:9505#0/1 C 67
AF ILLUMINA-E6F4B9:7:38:17733:3703#0/1 C 67
AF ILLUMINA-E6F4B9:7:64:15159:8037#0/1 C 67
AF ILLUMINA-E6F4B9:7:67:7596:2203#0/1 C 67
AF ILLUMINA-E6F4B9:7:103:16808:12177#0/1 C 67
AF ILLUMINA-E6F4B9:7:106:9372:3291#0/1 C 67
AF ILLUMINA-E6F4B9:7:113:13104:16842#0/1 C 67
AF ILLUMINA-E6F4B9:7:3:13311:18574#0/1 C 68
AF ILLUMINA-E6F4B9:7:21:10460:19297#0/1 C 68
AF ILLUMINA-E6F4B9:7:26:2078:20076#0/1 C 68
AF ILLUMINA-E6F4B9:7:78:15857:5159#0/1 C 68
AF ILLUMINA-E6F4B9:7:95:12152:14125#0/1 C 68
AF ILLUMINA-E6F4B9:7:97:11524:11302#0/1 C 68
AF ILLUMINA-E6F4B9:7:107:5928:19468#0/1 C 68
AF ILLUMINA-E6F4B9:7:114:17698:20321#0/1 C 68
AF ILLUMINA-E6F4B9:7:2:5212:14739#0/1 C 69
AF ILLUMINA-E6F4B9:7:28:6082:16305#0/1 C 69
AF ILLUMINA-E6F4B9:7:28:19181:18578#0/1 C 69
AF ILLUMINA-E6F4B9:7:90:2892:10840#0/1 C 69
AF ILLUMINA-E6F4B9:7:101:19256:7218#0/1 C 69
AF ILLUMINA-E6F4B9:7:68:10165:19814#0/1 C 65
AF ILLUMINA-E6F4B9:7:52:7426:10489#0/1 C 70
AF ILLUMINA-E6F4B9:7:56:15096:8934#0/1 C 70
AF ILLUMINA-E6F4B9:7:100:9999:17109#0/1 C 70
AF ILLUMINA-E6F4B9:7:74:16939:1049#0/1 C 373
AF ILLUMINA-E6F4B9:7:85:10504:2200#0/1 C 373
AF ILLUMINA-E6F4B9:7:100:3212:19873#0/1 C 373
AF ILLUMINA-E6F4B9:7:74:7180:15967#0/1 C 373
AF ILLUMINA-E6F4B9:7:34:7515:17532#0/1 C 375
AF ILLUMINA-E6F4B9:7:38:8040:15547#0/1 C 375
AF ILLUMINA-E6F4B9:7:39:12772:5040#0/1 C 375
AF ILLUMINA-E6F4B9:7:47:14616:16644#0/1 C 375
AF ILLUMINA-E6F4B9:7:49:10598:7233#0/1 C 375
AF ILLUMINA-E6F4B9:7:52:3140:1424#0/1 C 375
AF ILLUMINA-E6F4B9:7:54:8864:19775#0/1 C 375
AF ILLUMINA-E6F4B9:7:56:8943:19918#0/1 C 375
AF ILLUMINA-E6F4B9:7:70:8712:9805#0/1 C 375
AF ILLUMINA-E6F4B9:7:83:12690:7475#0/1 C 375
AF ILLUMINA-E6F4B9:7:87:4517:1650#0/1 C 375
AF ILLUMINA-E6F4B9:7:116:14161:6099#0/1 C 375
AF ILLUMINA-E6F4B9:7:10:3051:11632#0/1 C 376
AF ILLUMINA-E6F4B9:7:23:15645:20135#0/1 C 376
AF ILLUMINA-E6F4B9:7:26:17447:17324#0/1 C 376
AF ILLUMINA-E6F4B9:7:34:7780:9884#0/1 C 376
AF ILLUMINA-E6F4B9:7:34:13458:18093#0/1 C 376
AF ILLUMINA-E6F4B9:7:36:9048:13590#0/1 C 376
AF ILLUMINA-E6F4B9:7:50:9967:17092#0/1 C 376
AF ILLUMINA-E6F4B9:7:67:13878:9104#0/1 C 376
AF ILLUMINA-E6F4B9:7:67:6366:15752#0/1 C 376
AF ILLUMINA-E6F4B9:7:74:3929:9354#0/1 C 376
AF ILLUMINA-E6F4B9:7:85:18391:4416#0/1 C 376
AF ILLUMINA-E6F4B9:7:88:3263:9824#0/1 C 376
AF ILLUMINA-E6F4B9:7:98:14561:15639#0/1 C 376
AF ILLUMINA-E6F4B9:7:75:13905:1208#0/1 C 378
AF ILLUMINA-E6F4B9:7:41:11307:11182#0/1 C 380
AF ILLUMINA-E6F4B9:7:60:13550:13765#0/1 U 380
AF ILLUMINA-E6F4B9:7:38:15339:12328#0/1 U 383
AF ILLUMINA-E6F4B9:7:108:10095:4472#0/1 U 383
AF ILLUMINA-E6F4B9:7:69:1555:16365#0/1 U 385
AF ILLUMINA-E6F4B9:7:9:2005:11115#0/1 U 386
AF ILLUMINA-E6F4B9:7:27:9408:6508#0/1 U 386
AF ILLUMINA-E6F4B9:7:117:2008:9117#0/1 U 386
AF ILLUMINA-E6F4B9:7:119:6031:18479#0/1 U 386
AF ILLUMINA-E6F4B9:7:83:4104:20684#0/1 C 386
AF ILLUMINA-E6F4B9:7:47:12422:19874#0/1 C 387
AF ILLUMINA-E6F4B9:7:67:6517:11158#0/1 U 387
AF ILLUMINA-E6F4B9:7:93:12161:19441#0/1 C 387
AF ILLUMINA-E6F4B9:7:108:7032:3842#0/1 C 387
AF ILLUMINA-E6F4B9:7:14:18055:10558#0/1 U 388
AF ILLUMINA-E6F4B9:7:36:19611:18131#0/1 U 388
AF ILLUMINA-E6F4B9:7:63:6760:10595#0/1 C 388
AF ILLUMINA-E6F4B9:7:77:3885:11509#0/1 C 388
AF ILLUMINA-E6F4B9:7:84:1612:14530#0/1 U 388
AF ILLUMINA-E6F4B9:7:69:5466:11087#0/1 C 388
AF ILLUMINA-E6F4B9:7:7:13114:7507#0/1 U 389
AF ILLUMINA-E6F4B9:7:120:9262:4990#0/1 U 389
AF ILLUMINA-E6F4B9:7:86:9447:14390#0/1 U 392
AF ILLUMINA-E6F4B9:7:33:7594:3048#0/1 U 393
AF ILLUMINA-E6F4B9:7:93:15094:7804#0/1 U 395
AF ILLUMINA-E6F4B9:7:37:13222:6024#0/1 U 396
AF ILLUMINA-E6F4B9:7:112:4782:21298#0/1 U 397
AF ILLUMINA-E6F4B9:7:97:4271:13432#0/1 U 399
AF ILLUMINA-E6F4B9:7:100:12843:6663#0/1 C 399
AF ILLUMINA-E6F4B9:7:17:9586:3465#0/1 U 401
AF ILLUMINA-E6F4B9:7:12:14518:2385#0/1 U 403
AF ILLUMINA-E6F4B9:7:44:10657:14034#0/1 U 404
AF ILLUMINA-E6F4B9:7:63:12330:4284#0/1 U 405
AF ILLUMINA-E6F4B9:7:110:4629:13584#0/1 U 405
AF ILLUMINA-E6F4B9:7:114:3274:6782#0/1 U 405
AF ILLUMINA-E6F4B9:7:114:18601:13143#0/1 U 421
AF ILLUMINA-E6F4B9:7:37:11458:3406#0/1 U 448
AF ILLUMINA-E6F4B9:7:67:2121:19876#0/1 U 448
AF ILLUMINA-E6F4B9:7:15:9082:18507#0/1 C 450
AF ILLUMINA-E6F4B9:7:9:4981:18312#0/1 U 454
AF ILLUMINA-E6F4B9:7:72:17026:3469#0/1 U 457
AF ILLUMINA-E6F4B9:7:65:2048:4036#0/1 U 459
AF ILLUMINA-E6F4B9:7:113:11018:16892#0/1 U 459
AF ILLUMINA-E6F4B9:7:30:5830:12428#0/1 U 460
AF ILLUMINA-E6F4B9:7:69:10848:12388#0/1 U 460
AF ILLUMINA-E6F4B9:7:105:16256:4991#0/1 U 460
AF ILLUMINA-E6F4B9:7:106:1490:6350#0/1 U 460
AF ILLUMINA-E6F4B9:7:28:3561:16863#0/1 U 461
AF ILLUMINA-E6F4B9:7:10:15872:16634#0/1 U 462
AF ILLUMINA-E6F4B9:7:84:15756:20007#0/1 U 462
AF ILLUMINA-E6F4B9:7:103:17213:3521#0/1 U 463
AF ILLUMINA-E6F4B9:7:12:6728:2873#0/1 U 464
AF ILLUMINA-E6F4B9:7:30:7114:1778#0/1 U 465
AF ILLUMINA-E6F4B9:7:75:15431:4755#0/1 C 469
AF ILLUMINA-E6F4B9:7:107:19572:14489#0/1 C 470
AF ILLUMINA-E6F4B9:7:60:14677:14060#0/1 U 473
AF ILLUMINA-E6F4B9:7:54:7373:5491#0/1 C 475
AF ILLUMINA-E6F4B9:7:33:6153:17782#0/1 U 478
AF ILLUMINA-E6F4B9:7:61:6765:3293#0/1 U 478
AF ILLUMINA-E6F4B9:7:56:16342:9711#0/1 U 479
AF ILLUMINA-E6F4B9:7:80:5471:2564#0/1 U 479
AF ILLUMINA-E6F4B9:7:3:15943:9190#0/1 U 480
AF ILLUMINA-E6F4B9:7:31:14438:9970#0/1 U 480
AF ILLUMINA-E6F4B9:7:58:19061:10589#0/1 U 481
AF ILLUMINA-E6F4B9:7:64:7477:8098#0/1 U 481
AF ILLUMINA-E6F4B9:7:72:3329:4283#0/1 U 481
AF ILLUMINA-E6F4B9:7:94:9365:5546#0/1 U 481
AF ILLUMINA-E6F4B9:7:113:11557:5210#0/1 U 481
AF ILLUMINA-E6F4B9:7:1:14890:3711#0/1 U 482
AF ILLUMINA-E6F4B9:7:5:8081:8365#0/1 U 482
AF ILLUMINA-E6F4B9:7:35:13761:19485#0/1 U 482
AF ILLUMINA-E6F4B9:7:36:15890:18390#0/1 U 482
AF ILLUMINA-E6F4B9:7:52:5149:18069#0/1 U 482
AF ILLUMINA-E6F4B9:7:63:15662:4810#0/1 U 482
AF ILLUMINA-E6F4B9:7:64:11244:2111#0/1 U 482
AF ILLUMINA-E6F4B9:7:117:17024:8973#0/1 U 482
AF ILLUMINA-E6F4B9:7:6:6678:20521#0/1 U 481
AF ILLUMINA-E6F4B9:7:14:15034:16102#0/1 U 483
AF ILLUMINA-E6F4B9:7:20:4660:17326#0/1 U 483
AF ILLUMINA-E6F4B9:7:42:11192:7076#0/1 U 483
AF ILLUMINA-E6F4B9:7:46:17529:3175#0/1 U 483
AF ILLUMINA-E6F4B9:7:46:7357:13232#0/1 U 483
AF ILLUMINA-E6F4B9:7:47:14208:11920#0/1 U 483
AF ILLUMINA-E6F4B9:7:49:15822:11480#0/1 U 483
AF ILLUMINA-E6F4B9:7:68:5553:8478#0/1 U 483
AF ILLUMINA-E6F4B9:7:87:9616:9261#0/1 U 483
AF ILLUMINA-E6F4B9:7:87:14783:18282#0/1 U 483
AF ILLUMINA-E6F4B9:7:91:11598:17205#0/1 U 483
AF ILLUMINA-E6F4B9:7:108:9790:15913#0/1 U 483
AF ILLUMINA-E6F4B9:7:112:10833:20169#0/1 U 483
AF ILLUMINA-E6F4B9:7:20:8039:2378#0/1 U 484
AF ILLUMINA-E6F4B9:7:27:16912:8449#0/1 U 484
AF ILLUMINA-E6F4B9:7:67:6415:12340#0/1 U 484
AF ILLUMINA-E6F4B9:7:95:14736:7015#0/1 U 484
AF ILLUMINA-E6F4B9:7:102:3133:2529#0/1 U 484
AF ILLUMINA-E6F4B9:7:116:8479:14586#0/1 U 484
AF ILLUMINA-E6F4B9:7:119:9233:8626#0/1 U 484
AF ILLUMINA-E6F4B9:7:34:3127:9538#0/1 U 484
AF ILLUMINA-E6F4B9:7:3:8170:1597#0/1 U 485
AF ILLUMINA-E6F4B9:7:3:8474:19317#0/1 U 485
AF ILLUMINA-E6F4B9:7:27:18142:9968#0/1 U 485
AF ILLUMINA-E6F4B9:7:44:4864:7405#0/1 U 485
AF ILLUMINA-E6F4B9:7:48:10657:13031#0/1 U 485
AF ILLUMINA-E6F4B9:7:55:1541:11703#0/1 U 485
AF ILLUMINA-E6F4B9:7:61:9477:17203#0/1 U 485
AF ILLUMINA-E6F4B9:7:68:4881:18662#0/1 U 485
AF ILLUMINA-E6F4B9:7:36:2937:4084#0/1 U 487
AF ILLUMINA-E6F4B9:7:25:2823:3218#0/1 U 498
AF ILLUMINA-E6F4B9:7:23:4992:20522#0/1 U 506
AF ILLUMINA-E6F4B9:7:107:18086:3799#0/1 U 506
AF ILLUMINA-E6F4B9:7:90:10054:7730#0/1 C 512
AF ILLUMINA-E6F4B9:7:117:9853:2672#0/1 U 512
AF ILLUMINA-E6F4B9:7:14:3774:11048#0/1 C 513
AF ILLUMINA-E6F4B9:7:65:1030:19337#0/1 U 521
AF ILLUMINA-E6F4B9:7:40:18117:15603#0/1 U 531
AF ILLUMINA-E6F4B9:7:13:19545:18173#0/1 U 532
AF ILLUMINA-E6F4B9:7:18:17061:19656#0/1 C 533
AF ILLUMINA-E6F4B9:7:46:13165:3460#0/1 C 533
AF ILLUMINA-E6F4B9:7:58:5634:7622#0/1 C 533
AF ILLUMINA-E6F4B9:7:72:3861:7542#0/1 C 533
AF ILLUMINA-E6F4B9:7:106:6089:13109#0/1 C 533
AF ILLUMINA-E6F4B9:7:109:7593:4255#0/1 U 533
AF ILLUMINA-E6F4B9:7:76:8387:5465#0/1 C 536
AF ILLUMINA-E6F4B9:7:7:8543:18045#0/1 U 539
AF ILLUMINA-E6F4B9:7:93:9555:19828#0/1 C 561
AF ILLUMINA-E6F4B9:7:26:10907:20854#0/1 U 569
AF ILLUMINA-E6F4B9:7:40:7972:16203#0/1 U 580
AF ILLUMINA-E6F4B9:7:3:11131:15834#0/1 C 582
AF ILLUMINA-E6F4B9:7:60:2574:21036#0/1 U 582
AF ILLUMINA-E6F4B9:7:10:19617:9353#0/1 C 584
AF ILLUMINA-E6F4B9:7:105:19247:11552#0/1 C 586
AF ILLUMINA-E6F4B9:7:115:15404:9187#0/1 C 590
AF ILLUMINA-E6F4B9:7:16:15345:1252#0/1 U 592
AF ILLUMINA-E6F4B9:7:105:16171:11975#0/1 U 592
AF ILLUMINA-E6F4B9:7:57:6737:12623#0/1 U 597
AF ILLUMINA-E6F4B9:7:65:15697:9884#0/1 U 601
AF ILLUMINA-E6F4B9:7:42:4595:4495#0/1 U 603
AF ILLUMINA-E6F4B9:7:68:2042:16964#0/1 U 608
AF ILLUMINA-E6F4B9:7:100:19442:16012#0/1 U 609
AF ILLUMINA-E6F4B9:7:29:9425:11213#0/1 C 610
AF ILLUMINA-E6F4B9:7:57:6619:11092#0/1 C 611
AF ILLUMINA-E6F4B9:7:5:11236:1503#0/1 C 616
AF ILLUMINA-E6F4B9:7:111:14491:1519#0/1 U 616
AF ILLUMINA-E6F4B9:7:74:3236:9507#0/1 C 617
AF ILLUMINA-E6F4B9:7:65:11861:17353#0/1 U 623
AF ILLUMINA-E6F4B9:7:12:16920:17135#0/1 U 624
AF ILLUMINA-E6F4B9:7:30:5178:7873#0/1 U 624
AF ILLUMINA-E6F4B9:7:77:7489:12769#0/1 U 624
AF ILLUMINA-E6F4B9:7:105:7151:14187#0/1 U 624
AF ILLUMINA-E6F4B9:7:4:13801:14836#0/1 U 627
AF ILLUMINA-E6F4B9:7:16:8937:3839#0/1 U 627
AF ILLUMINA-E6F4B9:7:102:18197:7663#0/1 U 627
AF ILLUMINA-E6F4B9:7:6:8912:6470#0/1 U 628
AF ILLUMINA-E6F4B9:7:67:8001:12623#0/1 U 628
AF ILLUMINA-E6F4B9:7:91:13461:11661#0/1 U 628
AF ILLUMINA-E6F4B9:7:68:17666:19181#0/1 U 630
AF ILLUMINA-E6F4B9:7:91:17589:5316#0/1 U 633
AF ILLUMINA-E6F4B9:7:63:15651:17550#0/1 U 641
AF ILLUMINA-E6F4B9:7:15:15793:13898#0/1 U 642
AF ILLUMINA-E6F4B9:7:1:16859:5208#0/1 U 643
AF ILLUMINA-E6F4B9:7:89:8069:7674#0/1 U 643
AF ILLUMINA-E6F4B9:7:18:12414:10696#0/1 U 645
AF ILLUMINA-E6F4B9:7:77:10677:1721#0/1 U 647
AF ILLUMINA-E6F4B9:7:46:6469:20028#0/1 U 651
AF ILLUMINA-E6F4B9:7:94:10083:7919#0/1 U 652
AF ILLUMINA-E6F4B9:7:23:12876:13078#0/1 U 653
AF ILLUMINA-E6F4B9:7:26:11945:5103#0/1 U 653
AF ILLUMINA-E6F4B9:7:45:2348:7373#0/1 U 653
AF ILLUMINA-E6F4B9:7:46:13799:14706#0/1 U 653
AF ILLUMINA-E6F4B9:7:86:4936:2005#0/1 U 653
AF ILLUMINA-E6F4B9:7:90:16444:11962#0/1 U 653
AF ILLUMINA-E6F4B9:7:114:7798:12255#0/1 U 653
AF ILLUMINA-E6F4B9:7:115:8585:1206#0/1 U 653
AF ILLUMINA-E6F4B9:7:7:19184:12244#0/1 C 670
AF ILLUMINA-E6F4B9:7:50:8851:7029#0/1 U 682
AF ILLUMINA-E6F4B9:7:59:4002:8664#0/1 U 682
AF ILLUMINA-E6F4B9:7:32:5550:9106#0/1 U 683
AF ILLUMINA-E6F4B9:7:58:5579:7121#0/1 U 683
AF ILLUMINA-E6F4B9:7:65:9259:9388#0/1 U 683
AF ILLUMINA-E6F4B9:7:11:12183:12853#0/1 U 686
AF ILLUMINA-E6F4B9:7:12:2328:20436#0/1 U 686
AF ILLUMINA-E6F4B9:7:40:12271:11956#0/1 U 686
AF ILLUMINA-E6F4B9:7:49:12049:2993#0/1 U 686
AF ILLUMINA-E6F4B9:7:76:9004:21262#0/1 U 686
AF ILLUMINA-E6F4B9:7:120:11310:16994#0/1 U 687
AF ILLUMINA-E6F4B9:7:94:2303:16821#0/1 U 689
AF ILLUMINA-E6F4B9:7:71:15503:11214#0/1 U 691
AF ILLUMINA-E6F4B9:7:31:17063:14618#0/1 U 692
AF ILLUMINA-E6F4B9:7:43:12948:15532#0/1 U 692
AF ILLUMINA-E6F4B9:7:5:1662:3906#0/1 U 694
AF ILLUMINA-E6F4B9:7:44:16665:19500#0/1 C 708
AF ILLUMINA-E6F4B9:7:8:6108:7372#0/1 C 709
AF ILLUMINA-E6F4B9:7:111:1069:10971#0/1 C 709
AF ILLUMINA-E6F4B9:7:80:3240:8139#0/1 C 711
AF ILLUMINA-E6F4B9:7:32:15998:17670#0/1 U 720
AF ILLUMINA-E6F4B9:7:110:15584:13117#0/1 U 720
AF ILLUMINA-E6F4B9:7:44:19225:17332#0/1 U 722
AF ILLUMINA-E6F4B9:7:108:8463:13910#0/1 U 722
AF ILLUMINA-E6F4B9:7:60:10109:6816#0/1 U 725
AF ILLUMINA-E6F4B9:7:68:12689:8361#0/1 U 725
AF ILLUMINA-E6F4B9:7:111:4236:18750#0/1 U 725
AF ILLUMINA-E6F4B9:7:67:14941:18328#0/1 U 726
AF ILLUMINA-E6F4B9:7:87:1946:17287#0/1 U 726
AF ILLUMINA-E6F4B9:7:113:11313:5030#0/1 U 726
AF ILLUMINA-E6F4B9:7:49:9964:14515#0/1 U 727
AF ILLUMINA-E6F4B9:7:82:5768:6506#0/1 U 727
AF ILLUMINA-E6F4B9:7:112:10425:11748#0/1 U 728
AF ILLUMINA-E6F4B9:7:12:15816:11280#0/1 U 729
AF ILLUMINA-E6F4B9:7:48:12026:9273#0/1 U 736
AF ILLUMINA-E6F4B9:7:104:5921:15819#0/1 U 736
AF ILLUMINA-E6F4B9:7:58:9428:4334#0/1 U 745
AF ILLUMINA-E6F4B9:7:8:19503:8591#0/1 U 744
AF ILLUMINA-E6F4B9:7:111:6324:3138#0/1 U 748
AF ILLUMINA-E6F4B9:7:34:16265:10753#0/1 U 749
AF ILLUMINA-E6F4B9:7:110:14401:15901#0/1 U 749
AF ILLUMINA-E6F4B9:7:23:4824:4737#0/1 U 750
AF ILLUMINA-E6F4B9:7:50:6719:18170#0/1 U 769
AF ILLUMINA-E6F4B9:7:76:10061:18157#0/1 U 769
AF ILLUMINA-E6F4B9:7:3:18412:19509#0/1 U 773
AF ILLUMINA-E6F4B9:7:110:5319:4714#0/1 C 795
AF ILLUMINA-E6F4B9:7:30:11581:17769#0/1 C 797
AF ILLUMINA-E6F4B9:7:14:12448:10118#0/1 U 798
AF ILLUMINA-E6F4B9:7:45:2383:19519#0/1 C 798
AF ILLUMINA-E6F4B9:7:119:7549:8156#0/1 C 798
AF ILLUMINA-E6F4B9:7:99:3871:18691#0/1 U 817
AF ILLUMINA-E6F4B9:7:64:17017:13722#0/1 U 818
AF ILLUMINA-E6F4B9:7:1:15154:15355#0/1 C 822
AF ILLUMINA-E6F4B9:7:120:15798:14589#0/1 U 825
AF ILLUMINA-E6F4B9:7:34:17770:13802#0/1 U 827
AF ILLUMINA-E6F4B9:7:120:15209:19447#0/1 C 831
AF ILLUMINA-E6F4B9:7:92:13303:6922#0/1 U 832
AF ILLUMINA-E6F4B9:7:23:15940:16062#0/1 U 835
AF ILLUMINA-E6F4B9:7:108:12143:17752#0/1 U 835
AF ILLUMINA-E6F4B9:7:17:10877:10143#0/1 U 836
AF ILLUMINA-E6F4B9:7:86:2406:18383#0/1 U 838
AF ILLUMINA-E6F4B9:7:116:14466:1738#0/1 U 838
AF ILLUMINA-E6F4B9:7:34:14020:2318#0/1 U 839
AF ILLUMINA-E6F4B9:7:37:9011:1268#0/1 U 839
AF ILLUMINA-E6F4B9:7:71:19528:18257#0/1 U 839
AF ILLUMINA-E6F4B9:7:110:4637:2444#0/1 U 840
AF ILLUMINA-E6F4B9:7:57:14818:1816#0/1 U 842
AF ILLUMINA-E6F4B9:7:81:6663:17232#0/1 U 851
AF ILLUMINA-E6F4B9:7:13:8772:18088#0/1 U 853
AF ILLUMINA-E6F4B9:7:3:14909:5330#0/1 C 856
AF ILLUMINA-E6F4B9:7:97:15380:18624#0/1 U 856
AF ILLUMINA-E6F4B9:7:22:5757:21257#0/1 C 872
AF ILLUMINA-E6F4B9:7:118:9320:5823#0/1 C 900
AF ILLUMINA-E6F4B9:7:47:18569:6358#0/1 U 909
AF ILLUMINA-E6F4B9:7:19:17124:10609#0/1 U 916
AF ILLUMINA-E6F4B9:7:82:7964:21030#0/1 C 925
AF ILLUMINA-E6F4B9:7:63:7123:8028#0/1 C 928
AF ILLUMINA-E6F4B9:7:77:2091:1793#0/1 C 928
AF ILLUMINA-E6F4B9:7:84:11922:16158#0/1 C 928
AF ILLUMINA-E6F4B9:7:87:4376:15804#0/1 C 930
AF ILLUMINA-E6F4B9:7:46:15988:17516#0/1 C 931
AF ILLUMINA-E6F4B9:7:57:11123:4961#0/1 C 933
AF ILLUMINA-E6F4B9:7:21:3296:17614#0/1 C 938
AF ILLUMINA-E6F4B9:7:95:7461:2409#0/1 C 940
AF ILLUMINA-E6F4B9:7:102:1901:18236#0/1 C 940
AF ILLUMINA-E6F4B9:7:112:19589:8793#0/1 U 950
AF ILLUMINA-E6F4B9:7:17:14524:11917#0/1 U 951
AF ILLUMINA-E6F4B9:7:74:4268:6472#0/1 U 951
AF ILLUMINA-E6F4B9:7:92:16468:17211#0/1 U 951
AF ILLUMINA-E6F4B9:7:44:18893:9702#0/1 U 952
AF ILLUMINA-E6F4B9:7:80:11068:1636#0/1 U 952
AF ILLUMINA-E6F4B9:7:93:3564:19409#0/1 U 952
AF ILLUMINA-E6F4B9:7:97:4003:15874#0/1 U 952
AF ILLUMINA-E6F4B9:7:106:6893:8513#0/1 U 952
AF ILLUMINA-E6F4B9:7:107:17359:18039#0/1 U 952
AF ILLUMINA-E6F4B9:7:115:15165:15147#0/1 U 952
AF ILLUMINA-E6F4B9:7:27:11260:4954#0/1 U 953
AF ILLUMINA-E6F4B9:7:48:3984:3387#0/1 U 953
AF ILLUMINA-E6F4B9:7:54:5699:3095#0/1 U 953
AF ILLUMINA-E6F4B9:7:55:13092:5528#0/1 U 953
AF ILLUMINA-E6F4B9:7:78:12741:8256#0/1 U 953
AF ILLUMINA-E6F4B9:7:83:19445:9542#0/1 U 953
AF ILLUMINA-E6F4B9:7:3:13057:16443#0/1 U 954
AF ILLUMINA-E6F4B9:7:51:15097:8334#0/1 U 954
AF ILLUMINA-E6F4B9:7:39:4601:11029#0/1 U 955
AF ILLUMINA-E6F4B9:7:40:9116:17174#0/1 U 955
AF ILLUMINA-E6F4B9:7:66:4419:9987#0/1 U 955
AF ILLUMINA-E6F4B9:7:73:8662:21092#0/1 U 955
AF ILLUMINA-E6F4B9:7:84:1960:10092#0/1 U 955
AF ILLUMINA-E6F4B9:7:116:8636:1829#0/1 U 955
AF ILLUMINA-E6F4B9:7:111:17786:16429#0/1 U 953
AF ILLUMINA-E6F4B9:7:48:18087:17040#0/1 U 955
AF ILLUMINA-E6F4B9:7:30:5214:19882#0/1 U 956
AF ILLUMINA-E6F4B9:7:114:16486:11948#0/1 U 956
AF ILLUMINA-E6F4B9:7:25:6310:12009#0/1 U 957
AF ILLUMINA-E6F4B9:7:60:8045:14758#0/1 U 957
AF ILLUMINA-E6F4B9:7:84:7640:10053#0/1 U 957
AF ILLUMINA-E6F4B9:7:85:7799:10337#0/1 U 957
AF ILLUMINA-E6F4B9:7:119:2461:2856#0/1 U 957
AF ILLUMINA-E6F4B9:7:57:18252:15093#0/1 U 958
AF ILLUMINA-E6F4B9:7:68:3390:9463#0/1 U 958
AF ILLUMINA-E6F4B9:7:98:15729:16565#0/1 U 958
AF ILLUMINA-E6F4B9:7:99:10529:3124#0/1 U 958
AF ILLUMINA-E6F4B9:7:116:14144:12873#0/1 U 958
AF ILLUMINA-E6F4B9:7:48:13701:12184#0/1 U 959
AF ILLUMINA-E6F4B9:7:8:6345:6523#0/1 U 960
AF ILLUMINA-E6F4B9:7:30:5163:1874#0/1 U 960
AF ILLUMINA-E6F4B9:7:64:10366:20676#0/1 U 962
AF ILLUMINA-E6F4B9:7:20:2727:10209#0/1 U 965
AF ILLUMINA-E6F4B9:7:104:13531:8771#0/1 U 968
AF ILLUMINA-E6F4B9:7:17:18792:9191#0/1 U 969
AF ILLUMINA-E6F4B9:7:97:10258:6869#0/1 U 1025
AF ILLUMINA-E6F4B9:7:102:5936:14566#0/1 U 1028
AF ILLUMINA-E6F4B9:7:71:7314:10929#0/1 U 1030
AF ILLUMINA-E6F4B9:7:15:1766:15327#0/1 U 1031
AF ILLUMINA-E6F4B9:7:13:17835:14570#0/1 U 1032
AF ILLUMINA-E6F4B9:7:72:12196:9345#0/1 U 1033
AF ILLUMINA-E6F4B9:7:74:17558:12172#0/1 U 1033
AF ILLUMINA-E6F4B9:7:91:15392:17062#0/1 U 1033
AF ILLUMINA-E6F4B9:7:20:2026:12439#0/1 U 1032
AF ILLUMINA-E6F4B9:7:30:5300:18627#0/1 U 1034
AF ILLUMINA-E6F4B9:7:45:2418:20290#0/1 U 1034
AF ILLUMINA-E6F4B9:7:70:1161:5188#0/1 U 1035
AF ILLUMINA-E6F4B9:7:82:10706:4177#0/1 U 1055
AF ILLUMINA-E6F4B9:7:42:16753:17001#0/1 U 1057
AF ILLUMINA-E6F4B9:7:18:10069:20965#0/1 C 1063
AF ILLUMINA-E6F4B9:7:45:12376:13406#0/1 C 1063
AF ILLUMINA-E6F4B9:7:91:5072:14482#0/1 U 1072
AF ILLUMINA-E6F4B9:7:28:9557:15413#0/1 C 1077
AF ILLUMINA-E6F4B9:7:120:2881:9462#0/1 C 1077
AF ILLUMINA-E6F4B9:7:42:5080:16048#0/1 U 1079
AF ILLUMINA-E6F4B9:7:41:15581:8823#0/1 U 1081
AF ILLUMINA-E6F4B9:7:95:8999:14372#0/1 U 1083
AF ILLUMINA-E6F4B9:7:36:8560:17884#0/1 U 1107
AF ILLUMINA-E6F4B9:7:114:15356:12182#0/1 C 1112
AF ILLUMINA-E6F4B9:7:30:4702:14262#0/1 U 1126
AF ILLUMINA-E6F4B9:7:49:2654:11989#0/1 C 1136
AF ILLUMINA-E6F4B9:7:68:3906:8054#0/1 U 1141
AF ILLUMINA-E6F4B9:7:105:10742:3361#0/1 U 1164
AF ILLUMINA-E6F4B9:7:34:18815:16824#0/1 C 1166
AF ILLUMINA-E6F4B9:7:9:2094:17356#0/1 U 1169
AF ILLUMINA-E6F4B9:7:87:12179:18991#0/1 U 1169
AF ILLUMINA-E6F4B9:7:119:9329:15258#0/1 U 1170
AF ILLUMINA-E6F4B9:7:10:16296:10275#0/1 U 1176
AF ILLUMINA-E6F4B9:7:70:8501:11249#0/1 U 1176
AF ILLUMINA-E6F4B9:7:29:13517:20902#0/1 U 1178
AF ILLUMINA-E6F4B9:7:88:3909:15813#0/1 C 1178
AF ILLUMINA-E6F4B9:7:116:19042:20114#0/1 C 1178
AF ILLUMINA-E6F4B9:7:33:8732:14695#0/1 C 1179
AF ILLUMINA-E6F4B9:7:15:11843:2736#0/1 U 1180
AF ILLUMINA-E6F4B9:7:82:9907:15125#0/1 U 1180
AF ILLUMINA-E6F4B9:7:14:8289:14245#0/1 U 1181
AF ILLUMINA-E6F4B9:7:28:8218:20568#0/1 U 1181
AF ILLUMINA-E6F4B9:7:21:17821:4384#0/1 U 1182
AF ILLUMINA-E6F4B9:7:71:9107:9480#0/1 U 1182
AF ILLUMINA-E6F4B9:7:70:1132:3818#0/1 U 1183
AF ILLUMINA-E6F4B9:7:98:12469:11746#0/1 U 1184
AF ILLUMINA-E6F4B9:7:96:11115:16380#0/1 U 1189
AF ILLUMINA-E6F4B9:7:21:15372:19124#0/1 U 1192
AF ILLUMINA-E6F4B9:7:70:5058:3587#0/1 U 1192
AF ILLUMINA-E6F4B9:7:54:6536:19335#0/1 U 1192
AF ILLUMINA-E6F4B9:7:9:15436:6988#0/1 U 1193
AF ILLUMINA-E6F4B9:7:39:14492:14569#0/1 U 1193
AF ILLUMINA-E6F4B9:7:89:7037:7950#0/1 U 1193
AF ILLUMINA-E6F4B9:7:103:7380:12177#0/1 U 1194
AF ILLUMINA-E6F4B9:7:83:3322:5632#0/1 C 1194
AF ILLUMINA-E6F4B9:7:93:2940:2323#0/1 U 1199
AF ILLUMINA-E6F4B9:7:105:7920:7104#0/1 U 1205
AF ILLUMINA-E6F4B9:7:38:2703:11904#0/1 C 1207
AF ILLUMINA-E6F4B9:7:83:17157:13554#0/1 U 1207
AF ILLUMINA-E6F4B9:7:25:15646:7189#0/1 C 1212
AF ILLUMINA-E6F4B9:7:5:1499:1209#0/1 C 1214
AF ILLUMINA-E6F4B9:7:6:18732:20575#0/1 C 1219
AF ILLUMINA-E6F4B9:7:49:17532:1275#0/1 C 1219
AF ILLUMINA-E6F4B9:7:96:4971:11431#0/1 C 1219
AF ILLUMINA-E6F4B9:7:35:16458:16943#0/1 C 1221
AF ILLUMINA-E6F4B9:7:70:19427:14378#0/1 C 1221
AF ILLUMINA-E6F4B9:7:95:4060:6944#0/1 C 1221
AF ILLUMINA-E6F4B9:7:21:5610:7106#0/1 C 1223
AF ILLUMINA-E6F4B9:7:97:6415:19317#0/1 C 1223
AF ILLUMINA-E6F4B9:7:105:11669:18191#0/1 C 1223
AF ILLUMINA-E6F4B9:7:51:18040:14614#0/1 C 1225
AF ILLUMINA-E6F4B9:7:46:9543:17498#0/1 U 1226
AF ILLUMINA-E6F4B9:7:86:3488:16032#0/1 C 1226
AF ILLUMINA-E6F4B9:7:99:11083:15796#0/1 C 1226
AF ILLUMINA-E6F4B9:7:113:14223:14598#0/1 C 1226
AF ILLUMINA-E6F4B9:7:48:2521:4166#0/1 U 1227
AF ILLUMINA-E6F4B9:7:99:18992:20483#0/1 U 1227
AF ILLUMINA-E6F4B9:7:116:9062:15661#0/1 U 1227
AF ILLUMINA-E6F4B9:7:12:4559:7161#0/1 U 1227
AF ILLUMINA-E6F4B9:7:9:6050:9808#0/1 C 1232
AF ILLUMINA-E6F4B9:7:50:9653:13870#0/1 C 1232
AF ILLUMINA-E6F4B9:7:50:11868:17082#0/1 C 1232
AF ILLUMINA-E6F4B9:7:79:4273:18428#0/1 C 1232
AF ILLUMINA-E6F4B9:7:85:4849:13104#0/1 C 1232
AF ILLUMINA-E6F4B9:7:16:14338:12295#0/1 C 1239
AF ILLUMINA-E6F4B9:7:26:9513:11690#0/1 C 1239
AF ILLUMINA-E6F4B9:7:35:15667:13092#0/1 C 1239
AF ILLUMINA-E6F4B9:7:101:11441:2638#0/1 C 1239
AF ILLUMINA-E6F4B9:7:29:18273:5786#0/1 C 1240
AF ILLUMINA-E6F4B9:7:104:15811:6111#0/1 C 1239
AF ILLUMINA-E6F4B9:7:60:15271:9178#0/1 C 1241
AF ILLUMINA-E6F4B9:7:96:10564:7144#0/1 C 1241
AF ILLUMINA-E6F4B9:7:41:4926:16851#0/1 C 1242
AF ILLUMINA-E6F4B9:7:13:5293:8861#0/1 U 1248
AF ILLUMINA-E6F4B9:7:70:2980:17460#0/1 U 1248
AF ILLUMINA-E6F4B9:7:102:12385:6585#0/1 U 1248
AF ILLUMINA-E6F4B9:7:4:13583:15442#0/1 U 1249
AF ILLUMINA-E6F4B9:7:22:12728:13996#0/1 U 1249
AF ILLUMINA-E6F4B9:7:41:5301:3482#0/1 U 1249
AF ILLUMINA-E6F4B9:7:101:17682:1893#0/1 U 1249
AF ILLUMINA-E6F4B9:7:118:1573:1762#0/1 U 1249
AF ILLUMINA-E6F4B9:7:29:4042:15015#0/1 U 1250
AF ILLUMINA-E6F4B9:7:44:7670:14968#0/1 U 1250
AF ILLUMINA-E6F4B9:7:87:17477:11900#0/1 U 1250
AF ILLUMINA-E6F4B9:7:114:18726:16785#0/1 U 1250
AF ILLUMINA-E6F4B9:7:4:7598:5991#0/1 U 1251
AF ILLUMINA-E6F4B9:7:10:4085:10675#0/1 U 1251
AF ILLUMINA-E6F4B9:7:48:6974:5894#0/1 U 1251
AF ILLUMINA-E6F4B9:7:58:9101:17966#0/1 U 1251
AF ILLUMINA-E6F4B9:7:75:3828:9926#0/1 U 1251
AF ILLUMINA-E6F4B9:7:90:9642:8820#0/1 U 1251
AF ILLUMINA-E6F4B9:7:66:11561:20024#0/1 U 1251
AF ILLUMINA-E6F4B9:7:7:2163:9792#0/1 U 1252
AF ILLUMINA-E6F4B9:7:23:14516:16694#0/1 U 1252
AF ILLUMINA-E6F4B9:7:24:12480:20170#0/1 U 1252
AF ILLUMINA-E6F4B9:7:45:5496:6609#0/1 U 1252
AF ILLUMINA-E6F4B9:7:83:11068:12393#0/1 U 1252
AF ILLUMINA-E6F4B9:7:91:6405:9177#0/1 U 1252
AF ILLUMINA-E6F4B9:7:111:5147:6030#0/1 U 1252
AF ILLUMINA-E6F4B9:7:116:17668:17624#0/1 U 1252
AF ILLUMINA-E6F4B9:7:4:2454:20649#0/1 U 1253
AF ILLUMINA-E6F4B9:7:27:15704:15077#0/1 U 1253
AF ILLUMINA-E6F4B9:7:42:10442:3353#0/1 U 1253
AF ILLUMINA-E6F4B9:7:43:7903:5319#0/1 U 1253
AF ILLUMINA-E6F4B9:7:48:17273:13482#0/1 U 1253
AF ILLUMINA-E6F4B9:7:51:8589:13380#0/1 U 1253
AF ILLUMINA-E6F4B9:7:101:12063:2881#0/1 U 1253
AF ILLUMINA-E6F4B9:7:113:11973:8402#0/1 U 1253
AF ILLUMINA-E6F4B9:7:113:15482:21190#0/1 U 1253
AF ILLUMINA-E6F4B9:7:3:5877:7538#0/1 U 1254
AF ILLUMINA-E6F4B9:7:12:8703:12050#0/1 U 1254
AF ILLUMINA-E6F4B9:7:44:6714:20699#0/1 U 1254
AF ILLUMINA-E6F4B9:7:46:12035:16692#0/1 U 1254
AF ILLUMINA-E6F4B9:7:53:12060:15080#0/1 U 1254
AF ILLUMINA-E6F4B9:7:58:9251:18659#0/1 U 1254
AF ILLUMINA-E6F4B9:7:69:2161:2291#0/1 U 1254
AF ILLUMINA-E6F4B9:7:69:10807:15389#0/1 U 1254
AF ILLUMINA-E6F4B9:7:74:16200:18473#0/1 U 1254
AF ILLUMINA-E6F4B9:7:75:18107:4389#0/1 U 1254
AF ILLUMINA-E6F4B9:7:98:10687:3827#0/1 U 1254
AF ILLUMINA-E6F4B9:7:109:6040:2771#0/1 U 1254
AF ILLUMINA-E6F4B9:7:115:15716:20777#0/1 U 1254
AF ILLUMINA-E6F4B9:7:119:10826:3394#0/1 U 1254
AF ILLUMINA-E6F4B9:7:46:14728:6512#0/1 U 1252
AF ILLUMINA-E6F4B9:7:2:15921:3533#0/1 U 1255
AF ILLUMINA-E6F4B9:7:9:14987:20392#0/1 U 1255
AF ILLUMINA-E6F4B9:7:18:6175:7804#0/1 U 1255
AF ILLUMINA-E6F4B9:7:20:18961:2568#0/1 U 1255
AF ILLUMINA-E6F4B9:7:20:11562:18863#0/1 U 1255
AF ILLUMINA-E6F4B9:7:23:12559:16564#0/1 U 1255
AF ILLUMINA-E6F4B9:7:29:13113:1706#0/1 U 1255
AF ILLUMINA-E6F4B9:7:29:19558:8938#0/1 U 1255
AF ILLUMINA-E6F4B9:7:32:11489:8099#0/1 U 1255
AF ILLUMINA-E6F4B9:7:33:11894:4967#0/1 U 1255
AF ILLUMINA-E6F4B9:7:40:2630:19014#0/1 U 1255
AF ILLUMINA-E6F4B9:7:41:19361:13572#0/1 U 1255
AF ILLUMINA-E6F4B9:7:50:19507:3220#0/1 U 1255
AF ILLUMINA-E6F4B9:7:50:14264:7995#0/1 U 1255
AF ILLUMINA-E6F4B9:7:53:12116:11674#0/1 U 1255
AF ILLUMINA-E6F4B9:7:56:2144:13197#0/1 U 1255
AF ILLUMINA-E6F4B9:7:62:8288:8163#0/1 U 1255
AF ILLUMINA-E6F4B9:7:68:12504:6571#0/1 U 1255
AF ILLUMINA-E6F4B9:7:70:7246:7767#0/1 U 1255
AF ILLUMINA-E6F4B9:7:72:12919:1727#0/1 U 1255
AF ILLUMINA-E6F4B9:7:73:8735:14065#0/1 U 1255
AF ILLUMINA-E6F4B9:7:75:15693:9851#0/1 U 1255
AF ILLUMINA-E6F4B9:7:80:7152:7104#0/1 U 1255
AF ILLUMINA-E6F4B9:7:82:3629:12128#0/1 U 1255
AF ILLUMINA-E6F4B9:7:90:4083:1357#0/1 U 1255
AF ILLUMINA-E6F4B9:7:95:17293:21267#0/1 U 1255
AF ILLUMINA-E6F4B9:7:103:12504:4149#0/1 U 1255
AF ILLUMINA-E6F4B9:7:105:17017:18716#0/1 U 1255
AF ILLUMINA-E6F4B9:7:107:5808:16402#0/1 U 1255
AF ILLUMINA-E6F4B9:7:115:1128:1125#0/1 U 1255
AF ILLUMINA-E6F4B9:7:115:10254:5701#0/1 U 1255
AF ILLUMINA-E6F4B9:7:118:7672:8681#0/1 U 1255
AF ILLUMINA-E6F4B9:7:118:10252:13400#0/1 U 1255
AF ILLUMINA-E6F4B9:7:120:12076:18303#0/1 U 1255
AF ILLUMINA-E6F4B9:7:78:17652:13479#0/1 U 1251
AF ILLUMINA-E6F4B9:7:45:16524:8345#0/1 U 1254
AF ILLUMINA-E6F4B9:7:2:4628:7432#0/1 U 1256
AF ILLUMINA-E6F4B9:7:3:16263:1632#0/1 U 1256
AF ILLUMINA-E6F4B9:7:14:16445:17280#0/1 U 1256
AF ILLUMINA-E6F4B9:7:18:14055:8867#0/1 U 1256
AF ILLUMINA-E6F4B9:7:28:17659:7678#0/1 U 1256
AF ILLUMINA-E6F4B9:7:35:5994:11648#0/1 U 1256
AF ILLUMINA-E6F4B9:7:36:6614:12721#0/1 U 1256
AF ILLUMINA-E6F4B9:7:39:2436:1259#0/1 U 1256
AF ILLUMINA-E6F4B9:7:39:3806:7850#0/1 U 1256
AF ILLUMINA-E6F4B9:7:40:19606:7560#0/1 U 1256
AF ILLUMINA-E6F4B9:7:53:15869:12671#0/1 U 1256
AF ILLUMINA-E6F4B9:7:55:5906:1376#0/1 U 1256
AF ILLUMINA-E6F4B9:7:55:2879:15786#0/1 U 1256
AF ILLUMINA-E6F4B9:7:57:17716:16444#0/1 U 1256
AF ILLUMINA-E6F4B9:7:59:17134:12024#0/1 U 1256
AF ILLUMINA-E6F4B9:7:65:8031:8005#0/1 U 1256
AF ILLUMINA-E6F4B9:7:74:19433:7635#0/1 U 1256
AF ILLUMINA-E6F4B9:7:81:6040:15744#0/1 U 1256
AF ILLUMINA-E6F4B9:7:88:4270:16618#0/1 U 1256
AF ILLUMINA-E6F4B9:7:94:5705:2108#0/1 U 1256
AF ILLUMINA-E6F4B9:7:95:16075:3844#0/1 U 1256
AF ILLUMINA-E6F4B9:7:98:12526:5048#0/1 U 1256
AF ILLUMINA-E6F4B9:7:113:8888:8409#0/1 U 1256
AF ILLUMINA-E6F4B9:7:115:5694:10512#0/1 U 1256
AF ILLUMINA-E6F4B9:7:115:13111:18952#0/1 U 1256
AF ILLUMINA-E6F4B9:7:3:15758:16623#0/1 U 1257
AF ILLUMINA-E6F4B9:7:4:12147:10676#0/1 U 1257
AF ILLUMINA-E6F4B9:7:6:15779:19413#0/1 U 1257
AF ILLUMINA-E6F4B9:7:10:16198:3860#0/1 U 1257
AF ILLUMINA-E6F4B9:7:12:17219:18177#0/1 U 1257
AF ILLUMINA-E6F4B9:7:21:15456:14857#0/1 U 1257
AF ILLUMINA-E6F4B9:7:23:13461:20836#0/1 U 1257
AF ILLUMINA-E6F4B9:7:28:8604:16138#0/1 U 1257
AF ILLUMINA-E6F4B9:7:30:7499:10676#0/1 U 1257
AF ILLUMINA-E6F4B9:7:31:1322:2624#0/1 U 1257
AF ILLUMINA-E6F4B9:7:31:17349:7095#0/1 U 1257
AF ILLUMINA-E6F4B9:7:43:2856:2255#0/1 U 1257
AF ILLUMINA-E6F4B9:7:43:1921:4196#0/1 U 1257
AF ILLUMINA-E6F4B9:7:44:5660:8643#0/1 U 1257
AF ILLUMINA-E6F4B9:7:44:3927:17750#0/1 U 1257
AF ILLUMINA-E6F4B9:7:45:19021:14798#0/1 U 1257
AF ILLUMINA-E6F4B9:7:48:19666:14867#0/1 U 1257
AF ILLUMINA-E6F4B9:7:49:5428:15998#0/1 U 1257
AF ILLUMINA-E6F4B9:7:50:7949:8805#0/1 U 1257
AF ILLUMINA-E6F4B9:7:51:18786:1692#0/1 U 1257
AF ILLUMINA-E6F4B9:7:59:10403:3662#0/1 U 1257
AF ILLUMINA-E6F4B9:7:60:12526:11222#0/1 U 1257
AF ILLUMINA-E6F4B9:7:61:1494:5959#0/1 U 1257
AF ILLUMINA-E6F4B9:7:66:2066:3672#0/1 U 1257
AF ILLUMINA-E6F4B9:7:67:5358:8035#0/1 U 1257
AF ILLUMINA-E6F4B9:7:68:9492:7776#0/1 U 1257
AF ILLUMINA-E6F4B9:7:71:17827:4598#0/1 U 1257
AF ILLUMINA-E6F4B9:7:74:18907:6026#0/1 U 1257
AF ILLUMINA-E6F4B9:7:77:8236:18893#0/1 U 1257
AF ILLUMINA-E6F4B9:7:78:7397:10505#0/1 U 1257
AF ILLUMINA-E6F4B9:7:79:15672:19184#0/1 U 1257
AF ILLUMINA-E6F4B9:7:81:8814:18004#0/1 U 1257
AF ILLUMINA-E6F4B9:7:82:8933:17437#0/1 U 1257
AF ILLUMINA-E6F4B9:7:86:4770:21211#0/1 U 1257
AF ILLUMINA-E6F4B9:7:87:12921:9869#0/1 U 1257
AF ILLUMINA-E6F4B9:7:90:14312:4118#0/1 U 1257
AF ILLUMINA-E6F4B9:7:91:16818:20067#0/1 U 1257
AF ILLUMINA-E6F4B9:7:92:2004:13122#0/1 U 1257
AF ILLUMINA-E6F4B9:7:93:2528:1334#0/1 U 1257
AF ILLUMINA-E6F4B9:7:93:4090:16645#0/1 U 1257
AF ILLUMINA-E6F4B9:7:97:12491:20832#0/1 U 1257
AF ILLUMINA-E6F4B9:7:98:12941:19404#0/1 U 1257
AF ILLUMINA-E6F4B9:7:99:14469:1815#0/1 U 1257
AF ILLUMINA-E6F4B9:7:102:13467:3229#0/1 U 1257
AF ILLUMINA-E6F4B9:7:104:17247:18509#0/1 U 1257
AF ILLUMINA-E6F4B9:7:111:2757:9046#0/1 U 1257
AF ILLUMINA-E6F4B9:7:111:3559:10896#0/1 U 1257
AF ILLUMINA-E6F4B9:7:114:11134:2052#0/1 U 1257
AF ILLUMINA-E6F4B9:7:116:5209:7213#0/1 U 1257
AF ILLUMINA-E6F4B9:7:116:5467:9313#0/1 U 1257
AF ILLUMINA-E6F4B9:7:120:12385:5909#0/1 U 1257
AF ILLUMINA-E6F4B9:7:26:17324:20679#0/1 U 1257
AF ILLUMINA-E6F4B9:7:1:11809:14005#0/1 U 1258
AF ILLUMINA-E6F4B9:7:4:13294:13575#0/1 U 1258
AF ILLUMINA-E6F4B9:7:16:14152:16260#0/1 U 1258
AF ILLUMINA-E6F4B9:7:17:12841:14547#0/1 U 1258
AF ILLUMINA-E6F4B9:7:25:18238:20290#0/1 U 1258
AF ILLUMINA-E6F4B9:7:27:6463:13896#0/1 U 1258
AF ILLUMINA-E6F4B9:7:27:11108:18103#0/1 U 1258
AF ILLUMINA-E6F4B9:7:28:12492:13041#0/1 U 1258
AF ILLUMINA-E6F4B9:7:28:12986:14072#0/1 U 1258
AF ILLUMINA-E6F4B9:7:30:15669:13223#0/1 U 1258
AF ILLUMINA-E6F4B9:7:32:8869:15952#0/1 U 1258
AF ILLUMINA-E6F4B9:7:35:6774:10541#0/1 U 1258
AF ILLUMINA-E6F4B9:7:36:3375:12489#0/1 U 1258
AF ILLUMINA-E6F4B9:7:37:3132:4656#0/1 U 1258
AF ILLUMINA-E6F4B9:7:37:13268:12146#0/1 U 1258
AF ILLUMINA-E6F4B9:7:40:18520:3022#0/1 U 1258
AF ILLUMINA-E6F4B9:7:41:13410:7964#0/1 U 1258
AF ILLUMINA-E6F4B9:7:42:13068:6132#0/1 U 1258
AF ILLUMINA-E6F4B9:7:44:3901:1287#0/1 U 1258
AF ILLUMINA-E6F4B9:7:50:16148:12627#0/1 U 1258
AF ILLUMINA-E6F4B9:7:59:5794:3988#0/1 U 1258
AF ILLUMINA-E6F4B9:7:66:2790:19635#0/1 U 1258
AF ILLUMINA-E6F4B9:7:67:3502:15531#0/1 U 1258
AF ILLUMINA-E6F4B9:7:73:18678:18353#0/1 U 1258
AF ILLUMINA-E6F4B9:7:77:7156:6126#0/1 U 1258
AF ILLUMINA-E6F4B9:7:77:2909:19295#0/1 U 1258
AF ILLUMINA-E6F4B9:7:80:14325:17316#0/1 U 1258
AF ILLUMINA-E6F4B9:7:81:7533:3992#0/1 U 1258
AF ILLUMINA-E6F4B9:7:86:3569:7555#0/1 U 1258
AF ILLUMINA-E6F4B9:7:87:7820:8709#0/1 U 1258
AF ILLUMINA-E6F4B9:7:92:10720:19257#0/1 U 1258
AF ILLUMINA-E6F4B9:7:95:10500:9340#0/1 U 1258
AF ILLUMINA-E6F4B9:7:100:4066:20045#0/1 U 1258
AF ILLUMINA-E6F4B9:7:102:15653:11068#0/1 U 1258
AF ILLUMINA-E6F4B9:7:104:5002:13412#0/1 U 1258
AF ILLUMINA-E6F4B9:7:105:1834:1298#0/1 U 1258
AF ILLUMINA-E6F4B9:7:109:17524:6643#0/1 U 1258
AF ILLUMINA-E6F4B9:7:116:11069:18875#0/1 U 1258
AF ILLUMINA-E6F4B9:7:74:16483:19806#0/1 U 1257
AF ILLUMINA-E6F4B9:7:2:5655:18045#0/1 U 1259
AF ILLUMINA-E6F4B9:7:13:5301:4927#0/1 U 1259
AF ILLUMINA-E6F4B9:7:23:19594:3033#0/1 U 1259
AF ILLUMINA-E6F4B9:7:25:14606:3603#0/1 U 1259
AF ILLUMINA-E6F4B9:7:31:19017:1503#0/1 U 1259
AF ILLUMINA-E6F4B9:7:31:8921:8529#0/1 U 1259
AF ILLUMINA-E6F4B9:7:35:14866:13093#0/1 U 1259
AF ILLUMINA-E6F4B9:7:37:17590:19287#0/1 U 1259
AF ILLUMINA-E6F4B9:7:40:5958:4484#0/1 U 1259
AF ILLUMINA-E6F4B9:7:40:3493:19455#0/1 U 1259
AF ILLUMINA-E6F4B9:7:42:15930:10303#0/1 U 1259
AF ILLUMINA-E6F4B9:7:43:19017:2410#0/1 U 1259
AF ILLUMINA-E6F4B9:7:43:12707:3409#0/1 U 1259
AF ILLUMINA-E6F4B9:7:45:7425:13975#0/1 U 1259
AF ILLUMINA-E6F4B9:7:47:13818:11639#0/1 U 1259
AF ILLUMINA-E6F4B9:7:51:14747:14517#0/1 U 1259
AF ILLUMINA-E6F4B9:7:54:16864:13803#0/1 U 1259
AF ILLUMINA-E6F4B9:7:59:10071:6064#0/1 U 1259
AF ILLUMINA-E6F4B9:7:60:11577:16203#0/1 U 1259
AF ILLUMINA-E6F4B9:7:61:17180:1347#0/1 U 1259
AF ILLUMINA-E6F4B9:7:64:13224:6566#0/1 U 1259
AF ILLUMINA-E6F4B9:7:65:4139:6388#0/1 U 1259
AF ILLUMINA-E6F4B9:7:67:9390:18943#0/1 U 1259
AF ILLUMINA-E6F4B9:7:68:6476:2543#0/1 U 1259
AF ILLUMINA-E6F4B9:7:68:8472:4937#0/1 U 1259
AF ILLUMINA-E6F4B9:7:68:14412:11295#0/1 U 1259
AF ILLUMINA-E6F4B9:7:83:11681:4643#0/1 U 1259
AF ILLUMINA-E6F4B9:7:88:14716:10027#0/1 U 1259
AF ILLUMINA-E6F4B9:7:96:18309:3470#0/1 U 1259
AF ILLUMINA-E6F4B9:7:96:15744:13230#0/1 U 1259
AF ILLUMINA-E6F4B9:7:98:16354:16773#0/1 U 1259
AF ILLUMINA-E6F4B9:7:99:3524:15902#0/1 U 1259
AF ILLUMINA-E6F4B9:7:100:18126:20869#0/1 U 1259
AF ILLUMINA-E6F4B9:7:103:8696:4110#0/1 U 1259
AF ILLUMINA-E6F4B9:7:106:4601:3613#0/1 U 1259
AF ILLUMINA-E6F4B9:7:107:18514:19164#0/1 U 1259
AF ILLUMINA-E6F4B9:7:113:4429:11316#0/1 U 1259
AF ILLUMINA-E6F4B9:7:118:15377:6752#0/1 U 1259
AF ILLUMINA-E6F4B9:7:118:11980:16209#0/1 U 1259
AF ILLUMINA-E6F4B9:7:2:5108:15380#0/1 U 1260
AF ILLUMINA-E6F4B9:7:6:3499:20579#0/1 U 1260
AF ILLUMINA-E6F4B9:7:6:17618:20940#0/1 U 1260
AF ILLUMINA-E6F4B9:7:10:11258:8994#0/1 U 1260
AF ILLUMINA-E6F4B9:7:17:16444:19303#0/1 U 1260
AF ILLUMINA-E6F4B9:7:18:2902:14733#0/1 U 1260
AF ILLUMINA-E6F4B9:7:21:11868:3115#0/1 U 1260
AF ILLUMINA-E6F4B9:7:21:3673:10501#0/1 U 1260
AF ILLUMINA-E6F4B9:7:26:13357:10082#0/1 U 1260
AF ILLUMINA-E6F4B9:7:28:15701:15529#0/1 U 1260
AF ILLUMINA-E6F4B9:7:28:6360:16965#0/1 U 1260
AF ILLUMINA-E6F4B9:7:30:11727:17460#0/1 U 1260
AF ILLUMINA-E6F4B9:7:32:6980:9702#0/1 U 1260
AF ILLUMINA-E6F4B9:7:33:18090:7494#0/1 U 1260
AF ILLUMINA-E6F4B9:7:38:17402:10307#0/1 U 1260
AF ILLUMINA-E6F4B9:7:39:15958:6419#0/1 U 1260
AF ILLUMINA-E6F4B9:7:40:17459:1230#0/1 U 1260
AF ILLUMINA-E6F4B9:7:42:19021:8748#0/1 U 1260
AF ILLUMINA-E6F4B9:7:52:3072:11790#0/1 U 1260
AF ILLUMINA-E6F4B9:7:55:11028:12072#0/1 U 1260
AF ILLUMINA-E6F4B9:7:58:4340:20120#0/1 U 1260
AF ILLUMINA-E6F4B9:7:59:8304:5360#0/1 U 1260
AF ILLUMINA-E6F4B9:7:63:1839:19160#0/1 U 1260
AF ILLUMINA-E6F4B9:7:65:7821:18025#0/1 U 1260
AF ILLUMINA-E6F4B9:7:67:9682:15241#0/1 U 1260
AF ILLUMINA-E6F4B9:7:68:4932:20681#0/1 U 1260
AF ILLUMINA-E6F4B9:7:72:13119:5727#0/1 U 1260
AF ILLUMINA-E6F4B9:7:74:15320:21126#0/1 U 1260
AF ILLUMINA-E6F4B9:7:75:3950:1382#0/1 U 1260
AF ILLUMINA-E6F4B9:7:79:15644:16800#0/1 U 1260
AF ILLUMINA-E6F4B9:7:82:6335:9035#0/1 U 1260
AF ILLUMINA-E6F4B9:7:84:10257:6457#0/1 U 1260
AF ILLUMINA-E6F4B9:7:84:15300:9491#0/1 U 1260
AF ILLUMINA-E6F4B9:7:93:7298:16445#0/1 U 1260
AF ILLUMINA-E6F4B9:7:94:18302:1172#0/1 U 1260
AF ILLUMINA-E6F4B9:7:95:4457:9997#0/1 U 1260
AF ILLUMINA-E6F4B9:7:100:12224:16471#0/1 U 1260
AF ILLUMINA-E6F4B9:7:101:2288:6407#0/1 U 1260
AF ILLUMINA-E6F4B9:7:103:10195:3328#0/1 U 1260
AF ILLUMINA-E6F4B9:7:105:7477:3123#0/1 U 1260
AF ILLUMINA-E6F4B9:7:105:12128:4657#0/1 U 1260
AF ILLUMINA-E6F4B9:7:105:18431:12720#0/1 U 1260
AF ILLUMINA-E6F4B9:7:110:3152:3278#0/1 U 1260
AF ILLUMINA-E6F4B9:7:112:15419:4365#0/1 U 1260
AF ILLUMINA-E6F4B9:7:112:18533:5540#0/1 U 1260
AF ILLUMINA-E6F4B9:7:113:10886:11229#0/1 U 1260
AF ILLUMINA-E6F4B9:7:119:13321:6343#0/1 U 1260
AF ILLUMINA-E6F4B9:7:42:5736:1236#0/1 U 1260
AF ILLUMINA-E6F4B9:7:6:7381:17500#0/1 U 1261
AF ILLUMINA-E6F4B9:7:6:18792:19599#0/1 U 1261
AF ILLUMINA-E6F4B9:7:7:9170:6570#0/1 U 1261
AF ILLUMINA-E6F4B9:7:7:1154:19219#0/1 U 1261
AF ILLUMINA-E6F4B9:7:8:3270:5928#0/1 U 1261
AF ILLUMINA-E6F4B9:7:11:6538:7238#0/1 U 1261
AF ILLUMINA-E6F4B9:7:14:17121:7666#0/1 U 1261
AF ILLUMINA-E6F4B9:7:15:10662:5150#0/1 U 1261
AF ILLUMINA-E6F4B9:7:17:12266:18765#0/1 U 1261
AF ILLUMINA-E6F4B9:7:24:11168:11532#0/1 U 1261
AF ILLUMINA-E6F4B9:7:26:6897:4115#0/1 U 1261
AF ILLUMINA-E6F4B9:7:26:5900:14353#0/1 U 1261
AF ILLUMINA-E6F4B9:7:37:13061:6271#0/1 U 1261
AF ILLUMINA-E6F4B9:7:41:17051:9512#0/1 U 1261
AF ILLUMINA-E6F4B9:7:42:6699:10866#0/1 U 1261
AF ILLUMINA-E6F4B9:7:44:6401:18243#0/1 U 1261
AF ILLUMINA-E6F4B9:7:46:4619:10112#0/1 U 1261
AF ILLUMINA-E6F4B9:7:46:9339:16068#0/1 U 1261
AF ILLUMINA-E6F4B9:7:47:4584:2647#0/1 U 1261
AF ILLUMINA-E6F4B9:7:49:14956:19820#0/1 U 1261
AF ILLUMINA-E6F4B9:7:52:3510:15223#0/1 U 1261
AF ILLUMINA-E6F4B9:7:54:6320:18518#0/1 U 1261
AF ILLUMINA-E6F4B9:7:55:8527:16643#0/1 U 1261
AF ILLUMINA-E6F4B9:7:57:14252:3886#0/1 U 1261
AF ILLUMINA-E6F4B9:7:57:12438:14366#0/1 U 1261
AF ILLUMINA-E6F4B9:7:59:10080:2159#0/1 U 1261
AF ILLUMINA-E6F4B9:7:65:2809:16763#0/1 U 1261
AF ILLUMINA-E6F4B9:7:66:1172:3440#0/1 U 1261
AF ILLUMINA-E6F4B9:7:68:17846:18991#0/1 U 1261
AF ILLUMINA-E6F4B9:7:68:7344:19599#0/1 U 1261
AF ILLUMINA-E6F4B9:7:68:13171:19612#0/1 U 1261
AF ILLUMINA-E6F4B9:7:69:3431:21260#0/1 U 1261
AF ILLUMINA-E6F4B9:7:71:11159:14822#0/1 U 1261
AF ILLUMINA-E6F4B9:7:74:12598:6544#0/1 U 1261
AF ILLUMINA-E6F4B9:7:75:18509:8126#0/1 U 1261
AF ILLUMINA-E6F4B9:7:76:7274:9216#0/1 U 1261
AF ILLUMINA-E6F4B9:7:78:18469:12592#0/1 U 1261
AF ILLUMINA-E6F4B9:7:81:9064:2939#0/1 U 1261
AF ILLUMINA-E6F4B9:7:81:2605:5758#0/1 U 1261
AF ILLUMINA-E6F4B9:7:83:7635:7449#0/1 U 1261
AF ILLUMINA-E6F4B9:7:84:14339:1504#0/1 U 1261
AF ILLUMINA-E6F4B9:7:84:4939:8636#0/1 U 1261
AF ILLUMINA-E6F4B9:7:84:8070:10061#0/1 U 1261
AF ILLUMINA-E6F4B9:7:87:2709:4869#0/1 U 1261
AF ILLUMINA-E6F4B9:7:91:14553:17134#0/1 U 1261
AF ILLUMINA-E6F4B9:7:92:11543:12064#0/1 U 1261
AF ILLUMINA-E6F4B9:7:92:13815:12245#0/1 U 1261
AF ILLUMINA-E6F4B9:7:94:17705:12449#0/1 U 1261
AF ILLUMINA-E6F4B9:7:96:14039:18844#0/1 U 1261
AF ILLUMINA-E6F4B9:7:98:9618:8067#0/1 U 1261
AF ILLUMINA-E6F4B9:7:100:4899:1643#0/1 U 1261
AF ILLUMINA-E6F4B9:7:101:16192:6054#0/1 U 1261
AF ILLUMINA-E6F4B9:7:101:6459:8680#0/1 U 1261
AF ILLUMINA-E6F4B9:7:104:4637:17586#0/1 U 1261
AF ILLUMINA-E6F4B9:7:110:5482:5500#0/1 U 1261
AF ILLUMINA-E6F4B9:7:112:11643:19859#0/1 U 1261
AF ILLUMINA-E6F4B9:7:114:15188:7529#0/1 U 1261
AF ILLUMINA-E6F4B9:7:116:17374:6322#0/1 U 1261
AF ILLUMINA-E6F4B9:7:116:14478:6580#0/1 U 1261
AF ILLUMINA-E6F4B9:7:118:13744:20053#0/1 U 1261
AF ILLUMINA-E6F4B9:7:120:5473:17069#0/1 U 1261
AF ILLUMINA-E6F4B9:7:90:3211:17414#0/1 U 1260
AF ILLUMINA-E6F4B9:7:8:14728:15676#0/1 U 1262
AF ILLUMINA-E6F4B9:7:9:19154:15370#0/1 U 1262
AF ILLUMINA-E6F4B9:7:13:3932:3126#0/1 U 1262
AF ILLUMINA-E6F4B9:7:20:3527:15302#0/1 U 1262
AF ILLUMINA-E6F4B9:7:23:11591:10818#0/1 U 1262
AF ILLUMINA-E6F4B9:7:24:7180:10515#0/1 U 1262
AF ILLUMINA-E6F4B9:7:36:11886:11833#0/1 U 1262
AF ILLUMINA-E6F4B9:7:38:19333:11604#0/1 U 1262
AF ILLUMINA-E6F4B9:7:45:4434:1784#0/1 U 1262
AF ILLUMINA-E6F4B9:7:48:11565:19036#0/1 U 1262
AF ILLUMINA-E6F4B9:7:53:17712:17953#0/1 U 1262
AF ILLUMINA-E6F4B9:7:56:8806:14389#0/1 U 1262
AF ILLUMINA-E6F4B9:7:73:14160:13301#0/1 U 1262
AF ILLUMINA-E6F4B9:7:74:3657:20778#0/1 U 1262
AF ILLUMINA-E6F4B9:7:80:2120:9641#0/1 U 1262
AF ILLUMINA-E6F4B9:7:81:4480:7361#0/1 U 1262
AF ILLUMINA-E6F4B9:7:85:9978:13373#0/1 U 1262
AF ILLUMINA-E6F4B9:7:93:13023:18007#0/1 U 1262
AF ILLUMINA-E6F4B9:7:104:16173:8002#0/1 U 1262
AF ILLUMINA-E6F4B9:7:105:6732:16147#0/1 U 1262
AF ILLUMINA-E6F4B9:7:106:4065:12272#0/1 U 1262
AF ILLUMINA-E6F4B9:7:109:15253:13730#0/1 U 1262
AF ILLUMINA-E6F4B9:7:112:18952:10666#0/1 U 1262
AF ILLUMINA-E6F4B9:7:113:4052:15777#0/1 U 1262
AF ILLUMINA-E6F4B9:7:114:3035:10466#0/1 U 1262
AF ILLUMINA-E6F4B9:7:118:9177:3209#0/1 U 1262
AF ILLUMINA-E6F4B9:7:70:13175:8394#0/1 U 1259
AF ILLUMINA-E6F4B9:7:86:11197:11596#0/1 U 1259
AF ILLUMINA-E6F4B9:7:52:3350:13973#0/1 U 1261
AF ILLUMINA-E6F4B9:7:13:18619:3147#0/1 U 1263
AF ILLUMINA-E6F4B9:7:26:8374:2207#0/1 U 1263
AF ILLUMINA-E6F4B9:7:42:8512:14965#0/1 U 1263
AF ILLUMINA-E6F4B9:7:43:4097:3724#0/1 U 1263
AF ILLUMINA-E6F4B9:7:60:11542:5044#0/1 U 1263
AF ILLUMINA-E6F4B9:7:62:3401:11002#0/1 U 1263
AF ILLUMINA-E6F4B9:7:72:16380:18016#0/1 U 1263
AF ILLUMINA-E6F4B9:7:75:5186:9620#0/1 U 1263
AF ILLUMINA-E6F4B9:7:106:1362:6118#0/1 U 1263
AF ILLUMINA-E6F4B9:7:119:8397:4221#0/1 U 1263
AF ILLUMINA-E6F4B9:7:78:2495:12264#0/1 U 1264
AF ILLUMINA-E6F4B9:7:34:1973:8879#0/1 U 1286
AF ILLUMINA-E6F4B9:7:48:13327:20300#0/1 C 1288
AF ILLUMINA-E6F4B9:7:27:12051:21018#0/1 U 1296
AF ILLUMINA-E6F4B9:7:105:4417:10419#0/1 U 1298
AF ILLUMINA-E6F4B9:7:98:8740:17733#0/1 U 1299
AF ILLUMINA-E6F4B9:7:115:8369:17522#0/1 C 1302
AF ILLUMINA-E6F4B9:7:20:3461:20104#0/1 C 1303
AF ILLUMINA-E6F4B9:7:45:8144:21007#0/1 C 1305
AF ILLUMINA-E6F4B9:7:27:3588:9394#0/1 U 1307
AF ILLUMINA-E6F4B9:7:16:12138:6927#0/1 U 1308
AF ILLUMINA-E6F4B9:7:24:7693:21165#0/1 U 1311
AF ILLUMINA-E6F4B9:7:77:13370:1941#0/1 U 1311
AF ILLUMINA-E6F4B9:7:6:7986:1934#0/1 U 1312
AF ILLUMINA-E6F4B9:7:120:15250:4888#0/1 U 1312
AF ILLUMINA-E6F4B9:7:72:16886:2678#0/1 C 1312
AF ILLUMINA-E6F4B9:7:25:15300:19606#0/1 U 1313
AF ILLUMINA-E6F4B9:7:38:8040:1635#0/1 U 1314
AF ILLUMINA-E6F4B9:7:69:11782:16385#0/1 U 1314
AF ILLUMINA-E6F4B9:7:95:10628:13120#0/1 U 1314
AF ILLUMINA-E6F4B9:7:25:15062:3935#0/1 U 1315
AF ILLUMINA-E6F4B9:7:101:13702:6138#0/1 U 1316
AF ILLUMINA-E6F4B9:7:73:11401:3238#0/1 U 1317
AF ILLUMINA-E6F4B9:7:82:16338:7630#0/1 U 1317
AF ILLUMINA-E6F4B9:7:78:9865:4247#0/1 U 1318
AF ILLUMINA-E6F4B9:7:93:19737:3120#0/1 U 1319
AF ILLUMINA-E6F4B9:7:93:13494:10131#0/1 U 1319
AF ILLUMINA-E6F4B9:7:98:3921:11504#0/1 U 1321
AF ILLUMINA-E6F4B9:7:107:3322:15265#0/1 C 1326
AF ILLUMINA-E6F4B9:7:66:1682:4373#0/1 U 1328
AF ILLUMINA-E6F4B9:7:113:7045:16856#0/1 C 1329
AF ILLUMINA-E6F4B9:7:7:15662:15912#0/1 C 1330
AF ILLUMINA-E6F4B9:7:3:11739:7756#0/1 C 1339
AF ILLUMINA-E6F4B9:7:111:5021:14436#0/1 C 1339
AF ILLUMINA-E6F4B9:7:72:6651:10395#0/1 U 1340
AF ILLUMINA-E6F4B9:7:80:2878:6315#0/1 U 1340
AF ILLUMINA-E6F4B9:7:9:4579:9072#0/1 U 1341
AF ILLUMINA-E6F4B9:7:63:7786:14304#0/1 C 1344
AF ILLUMINA-E6F4B9:7:33:5085:10967#0/1 C 1347
AF ILLUMINA-E6F4B9:7:37:5416:19008#0/1 C 1347
AF ILLUMINA-E6F4B9:7:51:10567:12774#0/1 C 1347
AF ILLUMINA-E6F4B9:7:100:16314:4485#0/1 C 1347
AF ILLUMINA-E6F4B9:7:102:10661:16856#0/1 C 1347
AF ILLUMINA-E6F4B9:7:69:12750:9820#0/1 C 1350
AF ILLUMINA-E6F4B9:7:4:19038:14709#0/1 C 1368
AF ILLUMINA-E6F4B9:7:22:2485:18676#0/1 U 1369
AF ILLUMINA-E6F4B9:7:40:16036:15914#0/1 U 1374
AF ILLUMINA-E6F4B9:7:39:8171:1430#0/1 U 1376
AF ILLUMINA-E6F4B9:7:64:18797:11782#0/1 C 1377
AF ILLUMINA-E6F4B9:7:30:9960:15788#0/1 U 1379
AF ILLUMINA-E6F4B9:7:68:15493:10333#0/1 U 1381
AF ILLUMINA-E6F4B9:7:80:7023:6549#0/1 C 1392
AF ILLUMINA-E6F4B9:7:27:10184:8301#0/1 U 1400
AF ILLUMINA-E6F4B9:7:21:10123:19823#0/1 C 1405
AF ILLUMINA-E6F4B9:7:20:13250:11978#0/1 C 1417
AF ILLUMINA-E6F4B9:7:113:12040:3213#0/1 U 1422
AF ILLUMINA-E6F4B9:7:69:13717:20382#0/1 U 1424
AF ILLUMINA-E6F4B9:7:92:4788:12988#0/1 U 1424
AF ILLUMINA-E6F4B9:7:53:9683:8718#0/1 U 1425
AF ILLUMINA-E6F4B9:7:25:9739:18816#0/1 U 1428
AF ILLUMINA-E6F4B9:7:93:12210:19286#0/1 U 1467
AF ILLUMINA-E6F4B9:7:55:8476:1860#0/1 U 1472
AF ILLUMINA-E6F4B9:7:86:7679:11652#0/1 C 1476
AF ILLUMINA-E6F4B9:7:15:12307:7175#0/1 C 1478
AF ILLUMINA-E6F4B9:7:11:6517:17349#0/1 C 1482
AF ILLUMINA-E6F4B9:7:56:14928:4502#0/1 C 1482
AF ILLUMINA-E6F4B9:7:115:2042:9452#0/1 C 1482
AF ILLUMINA-E6F4B9:7:105:6515:11832#0/1 C 1485
AF ILLUMINA-E6F4B9:7:105:7983:8744#0/1 U 1487
AF ILLUMINA-E6F4B9:7:23:15620:9276#0/1 C 1504
AF ILLUMINA-E6F4B9:7:117:18917:11220#0/1 C 1507
AF ILLUMINA-E6F4B9:7:39:9708:6627#0/1 U 1510
AF ILLUMINA-E6F4B9:7:41:4586:12345#0/1 C 1510
AF ILLUMINA-E6F4B9:7:110:5705:16169#0/1 C 1512
AF ILLUMINA-E6F4B9:7:60:14566:20219#0/1 C 1513
AF ILLUMINA-E6F4B9:7:63:3814:10219#0/1 U 1533
AF ILLUMINA-E6F4B9:7:112:15254:3103#0/1 U 1534
AF ILLUMINA-E6F4B9:7:70:17889:21210#0/1 C 1535
AF ILLUMINA-E6F4B9:7:117:16914:16789#0/1 C 1537
AF ILLUMINA-E6F4B9:7:5:16886:20520#0/1 U 1543
AF ILLUMINA-E6F4B9:7:71:15941:1373#0/1 U 1543
AF ILLUMINA-E6F4B9:7:106:17386:15383#0/1 U 1544
AF ILLUMINA-E6F4B9:7:35:5069:12591#0/1 U 1545
AF ILLUMINA-E6F4B9:7:90:15041:10958#0/1 U 1546
AF ILLUMINA-E6F4B9:7:114:8541:21155#0/1 U 1548
AF ILLUMINA-E6F4B9:7:89:13707:17197#0/1 U 1546
AF ILLUMINA-E6F4B9:7:17:18719:17309#0/1 U 1547
AF ILLUMINA-E6F4B9:7:27:3618:4818#0/1 U 1547
AF ILLUMINA-E6F4B9:7:44:13441:17955#0/1 U 1547
AF ILLUMINA-E6F4B9:7:47:9443:20100#0/1 U 1547
AF ILLUMINA-E6F4B9:7:50:6824:12181#0/1 U 1547
AF ILLUMINA-E6F4B9:7:64:3625:8507#0/1 U 1547
AF ILLUMINA-E6F4B9:7:75:5419:14718#0/1 U 1547
AF ILLUMINA-E6F4B9:7:104:19629:1341#0/1 U 1547
AF ILLUMINA-E6F4B9:7:114:16606:14545#0/1 U 1547
AF ILLUMINA-E6F4B9:7:116:3530:13302#0/1 U 1547
AF ILLUMINA-E6F4B9:7:73:14259:20124#0/1 U 1548
AF ILLUMINA-E6F4B9:7:82:9350:4067#0/1 U 1548
AF ILLUMINA-E6F4B9:7:108:2745:3722#0/1 U 1549
AF ILLUMINA-E6F4B9:7:35:10523:11350#0/1 U 1550
AF ILLUMINA-E6F4B9:7:85:9284:17446#0/1 U 1550
AF ILLUMINA-E6F4B9:7:111:15109:20729#0/1 U 1550
AF ILLUMINA-E6F4B9:7:112:11045:6614#0/1 U 1550
AF ILLUMINA-E6F4B9:7:87:14951:12016#0/1 U 1552
AF ILLUMINA-E6F4B9:7:68:3045:5768#0/1 U 1586
AF ILLUMINA-E6F4B9:7:9:2442:1177#0/1 U 1653
AF ILLUMINA-E6F4B9:7:56:14500:16812#0/1 U 1653
AF ILLUMINA-E6F4B9:7:82:8095:18129#0/1 U 1653
AF ILLUMINA-E6F4B9:7:107:8944:10363#0/1 U 1653
AF ILLUMINA-E6F4B9:7:44:15818:11751#0/1 U 1654
AF ILLUMINA-E6F4B9:7:114:4400:13704#0/1 U 1654
AF ILLUMINA-E6F4B9:7:95:2840:6311#0/1 U 1655
AF ILLUMINA-E6F4B9:7:101:11739:10583#0/1 U 1655
AF ILLUMINA-E6F4B9:7:12:12310:12390#0/1 U 1656
AF ILLUMINA-E6F4B9:7:12:3196:15549#0/1 U 1656
AF ILLUMINA-E6F4B9:7:27:16271:3709#0/1 U 1656
AF ILLUMINA-E6F4B9:7:38:4807:12886#0/1 U 1656
AF ILLUMINA-E6F4B9:7:70:15128:14110#0/1 U 1656
AF ILLUMINA-E6F4B9:7:73:15493:12665#0/1 U 1656
AF ILLUMINA-E6F4B9:7:118:19469:3703#0/1 U 1656
AF ILLUMINA-E6F4B9:7:30:4389:19502#0/1 U 1657
AF ILLUMINA-E6F4B9:7:34:17848:13191#0/1 U 1657
AF ILLUMINA-E6F4B9:7:51:7158:12483#0/1 U 1657
AF ILLUMINA-E6F4B9:7:69:17398:11698#0/1 U 1657
AF ILLUMINA-E6F4B9:7:108:10045:7522#0/1 U 1657
AF ILLUMINA-E6F4B9:7:5:1662:16137#0/1 U 1658
AF ILLUMINA-E6F4B9:7:11:9799:12617#0/1 U 1658
AF ILLUMINA-E6F4B9:7:16:12415:9376#0/1 U 1658
AF ILLUMINA-E6F4B9:7:58:7235:15797#0/1 U 1658
AF ILLUMINA-E6F4B9:7:75:4008:21239#0/1 U 1658
AF ILLUMINA-E6F4B9:7:93:9444:7799#0/1 U 1658
AF ILLUMINA-E6F4B9:7:99:5754:11764#0/1 U 1658
AF ILLUMINA-E6F4B9:7:120:11288:3164#0/1 U 1658
AF ILLUMINA-E6F4B9:7:35:11406:18671#0/1 U 1659
AF ILLUMINA-E6F4B9:7:41:8201:12452#0/1 U 1659
AF ILLUMINA-E6F4B9:7:79:16196:2556#0/1 U 1659
AF ILLUMINA-E6F4B9:7:98:13540:14235#0/1 U 1659
AF ILLUMINA-E6F4B9:7:108:12129:5874#0/1 U 1659
AF ILLUMINA-E6F4B9:7:115:4281:8221#0/1 U 1659
AF ILLUMINA-E6F4B9:7:5:14844:6344#0/1 U 1660
AF ILLUMINA-E6F4B9:7:5:8714:13299#0/1 U 1660
AF ILLUMINA-E6F4B9:7:7:9253:2804#0/1 U 1660
AF ILLUMINA-E6F4B9:7:16:6088:19932#0/1 U 1660
AF ILLUMINA-E6F4B9:7:22:3924:13531#0/1 U 1660
AF ILLUMINA-E6F4B9:7:24:9024:14596#0/1 U 1660
AF ILLUMINA-E6F4B9:7:33:17392:13697#0/1 U 1660
AF ILLUMINA-E6F4B9:7:33:8869:16778#0/1 U 1660
AF ILLUMINA-E6F4B9:7:39:17270:2194#0/1 U 1660
AF ILLUMINA-E6F4B9:7:44:15571:8283#0/1 U 1660
AF ILLUMINA-E6F4B9:7:51:16978:8000#0/1 U 1660
AF ILLUMINA-E6F4B9:7:53:12855:9096#0/1 U 1660
AF ILLUMINA-E6F4B9:7:73:13175:10246#0/1 U 1660
AF ILLUMINA-E6F4B9:7:82:7825:1472#0/1 U 1660
AF ILLUMINA-E6F4B9:7:88:12871:7662#0/1 U 1660
AF ILLUMINA-E6F4B9:7:92:17244:11447#0/1 U 1660
AF ILLUMINA-E6F4B9:7:95:4372:6430#0/1 U 1660
AF ILLUMINA-E6F4B9:7:99:10410:7904#0/1 U 1660
AF ILLUMINA-E6F4B9:7:114:19051:7968#0/1 U 1660
AF ILLUMINA-E6F4B9:7:117:7314:19951#0/1 U 1660
AF ILLUMINA-E6F4B9:7:119:2636:20963#0/1 U 1660
AF ILLUMINA-E6F4B9:7:1:12366:21236#0/1 U 1661
AF ILLUMINA-E6F4B9:7:2:8368:6919#0/1 U 1661
AF ILLUMINA-E6F4B9:7:2:5398:9484#0/1 U 1661
AF ILLUMINA-E6F4B9:7:2:10530:13723#0/1 U 1661
AF ILLUMINA-E6F4B9:7:3:16710:15343#0/1 U 1661
AF ILLUMINA-E6F4B9:7:4:11670:3791#0/1 U 1661
AF ILLUMINA-E6F4B9:7:4:7280:4447#0/1 U 1661
AF ILLUMINA-E6F4B9:7:4:18670:9706#0/1 U 1661
AF ILLUMINA-E6F4B9:7:4:17676:17243#0/1 U 1661
AF ILLUMINA-E6F4B9:7:5:16072:11206#0/1 U 1661
AF ILLUMINA-E6F4B9:7:6:19806:1158#0/1 U 1661
AF ILLUMINA-E6F4B9:7:6:5855:3927#0/1 U 1661
AF ILLUMINA-E6F4B9:7:6:17494:10685#0/1 U 1661
AF ILLUMINA-E6F4B9:7:7:17870:2711#0/1 U 1661
AF ILLUMINA-E6F4B9:7:8:9548:5108#0/1 U 1661
AF ILLUMINA-E6F4B9:7:9:11336:9204#0/1 U 1661
AF ILLUMINA-E6F4B9:7:10:9832:3256#0/1 U 1661
AF ILLUMINA-E6F4B9:7:10:14390:3917#0/1 U 1661
AF ILLUMINA-E6F4B9:7:10:19086:4118#0/1 U 1661
AF ILLUMINA-E6F4B9:7:10:6472:11568#0/1 U 1661
AF ILLUMINA-E6F4B9:7:17:14508:17302#0/1 U 1661
AF ILLUMINA-E6F4B9:7:20:3976:7053#0/1 U 1661
AF ILLUMINA-E6F4B9:7:22:17212:13806#0/1 U 1661
AF ILLUMINA-E6F4B9:7:22:8253:17146#0/1 U 1661
AF ILLUMINA-E6F4B9:7:24:14325:3336#0/1 U 1661
AF ILLUMINA-E6F4B9:7:24:3060:13577#0/1 U 1661
AF ILLUMINA-E6F4B9:7:26:19077:16229#0/1 U 1661
AF ILLUMINA-E6F4B9:7:28:2446:3982#0/1 U 1661
AF ILLUMINA-E6F4B9:7:29:2012:5274#0/1 U 1661
AF ILLUMINA-E6F4B9:7:31:18569:10060#0/1 U 1661
AF ILLUMINA-E6F4B9:7:34:2776:10450#0/1 U 1661
AF ILLUMINA-E6F4B9:7:34:11021:10933#0/1 U 1661
AF ILLUMINA-E6F4B9:7:34:8260:18907#0/1 U 1661
AF ILLUMINA-E6F4B9:7:40:3172:12047#0/1 U 1661
AF ILLUMINA-E6F4B9:7:40:19709:18882#0/1 U 1661
AF ILLUMINA-E6F4B9:7:42:15390:17710#0/1 U 1661
AF ILLUMINA-E6F4B9:7:44:13099:8962#0/1 U 1661
AF ILLUMINA-E6F4B9:7:44:6986:18804#0/1 U 1661
AF ILLUMINA-E6F4B9:7:45:13002:1102#0/1 U 1661
AF ILLUMINA-E6F4B9:7:45:11358:6924#0/1 U 1661
AF ILLUMINA-E6F4B9:7:45:5706:20979#0/1 U 1661
AF ILLUMINA-E6F4B9:7:47:12666:8309#0/1 U 1661
AF ILLUMINA-E6F4B9:7:48:5308:8048#0/1 U 1661
AF ILLUMINA-E6F4B9:7:50:6697:21089#0/1 U 1661
AF ILLUMINA-E6F4B9:7:52:3513:16699#0/1 U 1661
AF ILLUMINA-E6F4B9:7:52:15298:17474#0/1 U 1661
AF ILLUMINA-E6F4B9:7:55:5013:3024#0/1 U 1661
AF ILLUMINA-E6F4B9:7:55:15180:6844#0/1 U 1661
AF ILLUMINA-E6F4B9:7:55:13979:14854#0/1 U 1661
AF ILLUMINA-E6F4B9:7:56:14550:10051#0/1 U 1661
AF ILLUMINA-E6F4B9:7:59:18854:9982#0/1 U 1661
AF ILLUMINA-E6F4B9:7:62:9475:18737#0/1 U 1661
AF ILLUMINA-E6F4B9:7:63:17119:10910#0/1 U 1661
AF ILLUMINA-E6F4B9:7:63:16861:11115#0/1 U 1661
AF ILLUMINA-E6F4B9:7:64:18554:7680#0/1 U 1661
AF ILLUMINA-E6F4B9:7:64:5228:17408#0/1 U 1661
AF ILLUMINA-E6F4B9:7:66:1919:17691#0/1 U 1661
AF ILLUMINA-E6F4B9:7:70:9925:17617#0/1 U 1661
AF ILLUMINA-E6F4B9:7:72:11250:6585#0/1 U 1661
AF ILLUMINA-E6F4B9:7:72:9907:14713#0/1 U 1661
AF ILLUMINA-E6F4B9:7:72:2440:16596#0/1 U 1661
AF ILLUMINA-E6F4B9:7:74:9993:18045#0/1 U 1661
AF ILLUMINA-E6F4B9:7:75:18690:5433#0/1 U 1661
AF ILLUMINA-E6F4B9:7:76:7311:5301#0/1 U 1661
AF ILLUMINA-E6F4B9:7:76:3316:14979#0/1 U 1661
AF ILLUMINA-E6F4B9:7:77:14120:6011#0/1 U 1661
AF ILLUMINA-E6F4B9:7:77:12157:16647#0/1 U 1661
AF ILLUMINA-E6F4B9:7:79:4348:9142#0/1 U 1661
AF ILLUMINA-E6F4B9:7:79:13065:20972#0/1 U 1661
AF ILLUMINA-E6F4B9:7:80:17274:15438#0/1 U 1661
AF ILLUMINA-E6F4B9:7:83:11524:7193#0/1 U 1661
AF ILLUMINA-E6F4B9:7:83:19457:13015#0/1 U 1661
AF ILLUMINA-E6F4B9:7:84:17716:4516#0/1 U 1661
AF ILLUMINA-E6F4B9:7:84:17064:8484#0/1 U 1661
AF ILLUMINA-E6F4B9:7:84:9038:10247#0/1 U 1661
AF ILLUMINA-E6F4B9:7:87:14720:13791#0/1 U 1661
AF ILLUMINA-E6F4B9:7:88:5265:5090#0/1 U 1661
AF ILLUMINA-E6F4B9:7:88:5174:11707#0/1 U 1661
AF ILLUMINA-E6F4B9:7:91:15014:12268#0/1 U 1661
AF ILLUMINA-E6F4B9:7:92:1824:7323#0/1 U 1661
AF ILLUMINA-E6F4B9:7:94:18988:4108#0/1 U 1661
AF ILLUMINA-E6F4B9:7:97:16590:2779#0/1 U 1661
AF ILLUMINA-E6F4B9:7:97:1263:8601#0/1 U 1661
AF ILLUMINA-E6F4B9:7:103:5308:8520#0/1 U 1661
AF ILLUMINA-E6F4B9:7:103:14563:13241#0/1 U 1661
AF ILLUMINA-E6F4B9:7:103:4624:21111#0/1 U 1661
AF ILLUMINA-E6F4B9:7:104:19164:1637#0/1 U 1661
AF ILLUMINA-E6F4B9:7:106:15561:3057#0/1 U 1661
AF ILLUMINA-E6F4B9:7:106:19175:12191#0/1 U 1661
AF ILLUMINA-E6F4B9:7:108:17370:2632#0/1 U 1661
AF ILLUMINA-E6F4B9:7:108:1871:8048#0/1 U 1661
AF ILLUMINA-E6F4B9:7:109:16920:3879#0/1 U 1661
AF ILLUMINA-E6F4B9:7:109:4156:14550#0/1 U 1661
AF ILLUMINA-E6F4B9:7:110:6126:12244#0/1 U 1661
AF ILLUMINA-E6F4B9:7:110:6448:16601#0/1 U 1661
AF ILLUMINA-E6F4B9:7:110:11616:17541#0/1 U 1661
AF ILLUMINA-E6F4B9:7:111:19820:12377#0/1 U 1661
AF ILLUMINA-E6F4B9:7:113:1449:8104#0/1 U 1661
AF ILLUMINA-E6F4B9:7:113:2956:8181#0/1 U 1661
AF ILLUMINA-E6F4B9:7:113:4578:14646#0/1 U 1661
AF ILLUMINA-E6F4B9:7:113:18067:19972#0/1 U 1661
AF ILLUMINA-E6F4B9:7:118:19037:7475#0/1 U 1661
AF ILLUMINA-E6F4B9:7:119:13189:8088#0/1 U 1661
AF ILLUMINA-E6F4B9:7:120:12241:2775#0/1 U 1661
AF ILLUMINA-E6F4B9:7:120:4153:4850#0/1 U 1661
AF ILLUMINA-E6F4B9:7:1:18379:6264#0/1 U 1661
AF ILLUMINA-E6F4B9:7:2:2027:7250#0/1 U 1662
AF ILLUMINA-E6F4B9:7:3:16710:6862#0/1 U 1662
AF ILLUMINA-E6F4B9:7:4:4894:21198#0/1 U 1662
AF ILLUMINA-E6F4B9:7:5:8851:14063#0/1 U 1662
AF ILLUMINA-E6F4B9:7:6:4998:12381#0/1 U 1662
AF ILLUMINA-E6F4B9:7:7:18499:15316#0/1 U 1662
AF ILLUMINA-E6F4B9:7:9:12613:6428#0/1 U 1662
AF ILLUMINA-E6F4B9:7:9:12667:19977#0/1 U 1662
AF ILLUMINA-E6F4B9:7:10:4422:14103#0/1 U 1662
AF ILLUMINA-E6F4B9:7:11:4124:8933#0/1 U 1662
AF ILLUMINA-E6F4B9:7:12:6338:3272#0/1 U 1662
AF ILLUMINA-E6F4B9:7:12:5957:4922#0/1 U 1662
AF ILLUMINA-E6F4B9:7:12:11700:13886#0/1 U 1662
AF ILLUMINA-E6F4B9:7:12:16900:20817#0/1 U 1662
AF ILLUMINA-E6F4B9:7:13:19596:17279#0/1 U 1662
AF ILLUMINA-E6F4B9:7:14:9268:12900#0/1 U 1662
AF ILLUMINA-E6F4B9:7:15:11532:10243#0/1 U 1662
AF ILLUMINA-E6F4B9:7:16:11940:16340#0/1 U 1662
AF ILLUMINA-E6F4B9:7:21:10254:11347#0/1 U 1662
AF ILLUMINA-E6F4B9:7:22:4730:11103#0/1 U 1662
AF ILLUMINA-E6F4B9:7:23:6786:2428#0/1 U 1662
AF ILLUMINA-E6F4B9:7:23:17432:14876#0/1 U 1662
AF ILLUMINA-E6F4B9:7:25:15855:4801#0/1 U 1662
AF ILLUMINA-E6F4B9:7:25:6664:12021#0/1 U 1662
AF ILLUMINA-E6F4B9:7:26:8422:4382#0/1 U 1662
AF ILLUMINA-E6F4B9:7:29:16952:20318#0/1 U 1662
AF ILLUMINA-E6F4B9:7:30:6189:18585#0/1 U 1662
AF ILLUMINA-E6F4B9:7:32:10908:12903#0/1 U 1662
AF ILLUMINA-E6F4B9:7:35:2179:11400#0/1 U 1662
AF ILLUMINA-E6F4B9:7:38:17540:6294#0/1 U 1662
AF ILLUMINA-E6F4B9:7:40:3129:2199#0/1 U 1662
AF ILLUMINA-E6F4B9:7:41:1380:7710#0/1 U 1662
AF ILLUMINA-E6F4B9:7:41:19219:11957#0/1 U 1662
AF ILLUMINA-E6F4B9:7:41:9932:12547#0/1 U 1662
AF ILLUMINA-E6F4B9:7:45:10217:16575#0/1 U 1662
AF ILLUMINA-E6F4B9:7:46:17481:5319#0/1 U 1662
AF ILLUMINA-E6F4B9:7:47:14833:16764#0/1 U 1662
AF ILLUMINA-E6F4B9:7:52:4159:8597#0/1 U 1662
AF ILLUMINA-E6F4B9:7:53:4670:16614#0/1 U 1662
AF ILLUMINA-E6F4B9:7:55:5766:13639#0/1 U 1662
AF ILLUMINA-E6F4B9:7:55:12453:16643#0/1 U 1662
AF ILLUMINA-E6F4B9:7:56:2911:16156#0/1 U 1662
AF ILLUMINA-E6F4B9:7:57:15347:13006#0/1 U 1662
AF ILLUMINA-E6F4B9:7:57:11181:17740#0/1 U 1662
AF ILLUMINA-E6F4B9:7:58:2067:10547#0/1 U 1662
AF ILLUMINA-E6F4B9:7:58:4855:19594#0/1 U 1662
AF ILLUMINA-E6F4B9:7:58:15219:19897#0/1 U 1662
AF ILLUMINA-E6F4B9:7:59:15980:19651#0/1 U 1662
AF ILLUMINA-E6F4B9:7:63:2502:2906#0/1 U 1662
AF ILLUMINA-E6F4B9:7:63:14583:5880#0/1 U 1662
AF ILLUMINA-E6F4B9:7:63:4777:19615#0/1 U 1662
AF ILLUMINA-E6F4B9:7:65:18399:5541#0/1 U 1662
AF ILLUMINA-E6F4B9:7:65:2143:5632#0/1 U 1662
AF ILLUMINA-E6F4B9:7:66:15748:15231#0/1 U 1662
AF ILLUMINA-E6F4B9:7:67:18639:17562#0/1 U 1662
AF ILLUMINA-E6F4B9:7:70:12442:9081#0/1 U 1662
AF ILLUMINA-E6F4B9:7:70:1453:16139#0/1 U 1662
AF ILLUMINA-E6F4B9:7:71:7472:13005#0/1 U 1662
AF ILLUMINA-E6F4B9:7:71:11759:18290#0/1 U 1662
AF ILLUMINA-E6F4B9:7:71:12941:20595#0/1 U 1662
AF ILLUMINA-E6F4B9:7:74:11596:2944#0/1 U 1662
AF ILLUMINA-E6F4B9:7:76:19246:14415#0/1 U 1662
AF ILLUMINA-E6F4B9:7:77:18137:6826#0/1 U 1662
AF ILLUMINA-E6F4B9:7:81:18672:11934#0/1 U 1662
AF ILLUMINA-E6F4B9:7:82:19592:9335#0/1 U 1662
AF ILLUMINA-E6F4B9:7:83:9380:9772#0/1 U 1662
AF ILLUMINA-E6F4B9:7:84:5326:1940#0/1 U 1662
AF ILLUMINA-E6F4B9:7:84:19810:12616#0/1 U 1662
AF ILLUMINA-E6F4B9:7:86:19628:15249#0/1 U 1662
AF ILLUMINA-E6F4B9:7:89:4073:20602#0/1 U 1662
AF ILLUMINA-E6F4B9:7:91:2364:6181#0/1 U 1662
AF ILLUMINA-E6F4B9:7:92:17741:5666#0/1 U 1662
AF ILLUMINA-E6F4B9:7:92:1732:7381#0/1 U 1662
AF ILLUMINA-E6F4B9:7:92:9669:16602#0/1 U 1662
AF ILLUMINA-E6F4B9:7:94:17766:5573#0/1 U 1662
AF ILLUMINA-E6F4B9:7:94:3554:18533#0/1 U 1662
AF ILLUMINA-E6F4B9:7:97:17237:2132#0/1 U 1662
AF ILLUMINA-E6F4B9:7:98:11031:13309#0/1 U 1662
AF ILLUMINA-E6F4B9:7:99:16739:11891#0/1 U 1662
AF ILLUMINA-E6F4B9:7:99:8421:12726#0/1 U 1662
AF ILLUMINA-E6F4B9:7:100:19606:10598#0/1 U 1662
AF ILLUMINA-E6F4B9:7:101:17502:11402#0/1 U 1662
AF ILLUMINA-E6F4B9:7:101:12290:17917#0/1 U 1662
AF ILLUMINA-E6F4B9:7:103:18196:19351#0/1 U 1662
AF ILLUMINA-E6F4B9:7:105:13037:17948#0/1 U 1662
AF ILLUMINA-E6F4B9:7:106:10831:4469#0/1 U 1662
AF ILLUMINA-E6F4B9:7:109:9590:21257#0/1 U 1662
AF ILLUMINA-E6F4B9:7:112:1528:2238#0/1 U 1662
AF ILLUMINA-E6F4B9:7:112:3376:2784#0/1 U 1662
AF ILLUMINA-E6F4B9:7:112:17416:6346#0/1 U 1662
AF ILLUMINA-E6F4B9:7:114:16613:15413#0/1 U 1662
AF ILLUMINA-E6F4B9:7:115:12916:3927#0/1 U 1662
AF ILLUMINA-E6F4B9:7:117:17750:12032#0/1 U 1662
AF ILLUMINA-E6F4B9:7:118:7069:7540#0/1 U 1662
AF ILLUMINA-E6F4B9:7:119:4760:15287#0/1 U 1662
AF ILLUMINA-E6F4B9:7:120:7727:4269#0/1 U 1662
AF ILLUMINA-E6F4B9:7:65:15646:10921#0/1 U 1661
AF ILLUMINA-E6F4B9:7:5:13960:11051#0/1 U 1663
AF ILLUMINA-E6F4B9:7:5:5989:11745#0/1 U 1663
AF ILLUMINA-E6F4B9:7:7:3210:18440#0/1 U 1663
AF ILLUMINA-E6F4B9:7:9:9718:16944#0/1 U 1663
AF ILLUMINA-E6F4B9:7:16:5083:6412#0/1 U 1663
AF ILLUMINA-E6F4B9:7:23:11973:2718#0/1 U 1663
AF ILLUMINA-E6F4B9:7:24:12541:14499#0/1 U 1663
AF ILLUMINA-E6F4B9:7:33:8043:16957#0/1 U 1663
AF ILLUMINA-E6F4B9:7:36:11869:13856#0/1 U 1663
AF ILLUMINA-E6F4B9:7:38:11767:3916#0/1 U 1663
AF ILLUMINA-E6F4B9:7:41:7992:4063#0/1 U 1663
AF ILLUMINA-E6F4B9:7:42:2563:8883#0/1 U 1663
AF ILLUMINA-E6F4B9:7:46:6860:18951#0/1 U 1663
AF ILLUMINA-E6F4B9:7:49:14794:8276#0/1 U 1663
AF ILLUMINA-E6F4B9:7:50:12450:9835#0/1 U 1663
AF ILLUMINA-E6F4B9:7:58:2466:14919#0/1 U 1663
AF ILLUMINA-E6F4B9:7:58:9194:19789#0/1 U 1663
AF ILLUMINA-E6F4B9:7:69:4769:9348#0/1 U 1663
AF ILLUMINA-E6F4B9:7:70:4455:16734#0/1 U 1663
AF ILLUMINA-E6F4B9:7:73:11690:6338#0/1 U 1663
AF ILLUMINA-E6F4B9:7:77:15725:3150#0/1 U 1663
AF ILLUMINA-E6F4B9:7:77:13915:5179#0/1 U 1663
AF ILLUMINA-E6F4B9:7:81:9447:3050#0/1 U 1663
AF ILLUMINA-E6F4B9:7:81:1650:8839#0/1 U 1663
AF ILLUMINA-E6F4B9:7:82:6476:10683#0/1 U 1663
AF ILLUMINA-E6F4B9:7:85:6000:13905#0/1 U 1663
AF ILLUMINA-E6F4B9:7:88:1391:9789#0/1 U 1663
AF ILLUMINA-E6F4B9:7:92:12746:3304#0/1 U 1663
AF ILLUMINA-E6F4B9:7:98:18011:11714#0/1 U 1663
AF ILLUMINA-E6F4B9:7:100:3046:16056#0/1 U 1663
AF ILLUMINA-E6F4B9:7:102:15382:6586#0/1 U 1663
AF ILLUMINA-E6F4B9:7:105:5963:5561#0/1 U 1663
AF ILLUMINA-E6F4B9:7:113:7155:17152#0/1 U 1663
AF ILLUMINA-E6F4B9:7:116:4071:12174#0/1 U 1663
AF ILLUMINA-E6F4B9:7:117:2677:8187#0/1 U 1663
AF ILLUMINA-E6F4B9:7:58:8120:11949#0/1 U 1663
AF ILLUMINA-E6F4B9:7:109:5022:3962#0/1 U 1663
AF ILLUMINA-E6F4B9:7:11:10205:6096#0/1 U 1664
AF ILLUMINA-E6F4B9:7:27:7261:9119#0/1 U 1664
AF ILLUMINA-E6F4B9:7:29:10700:17550#0/1 U 1664
AF ILLUMINA-E6F4B9:7:35:15142:20874#0/1 U 1664
AF ILLUMINA-E6F4B9:7:38:11139:1427#0/1 U 1664
AF ILLUMINA-E6F4B9:7:48:3861:14809#0/1 U 1664
AF ILLUMINA-E6F4B9:7:49:5630:20495#0/1 U 1664
AF ILLUMINA-E6F4B9:7:51:15899:14079#0/1 U 1664
AF ILLUMINA-E6F4B9:7:60:16939:19920#0/1 U 1664
AF ILLUMINA-E6F4B9:7:70:4843:3382#0/1 U 1664
AF ILLUMINA-E6F4B9:7:72:2745:10952#0/1 U 1664
AF ILLUMINA-E6F4B9:7:84:19403:6136#0/1 U 1664
AF ILLUMINA-E6F4B9:7:93:9712:1371#0/1 U 1664
AF ILLUMINA-E6F4B9:7:103:17675:1055#0/1 U 1664
AF ILLUMINA-E6F4B9:7:107:13807:19251#0/1 U 1664
AF ILLUMINA-E6F4B9:7:107:10986:19588#0/1 U 1664
AF ILLUMINA-E6F4B9:7:108:18650:10230#0/1 U 1664
AF ILLUMINA-E6F4B9:7:111:16078:14317#0/1 U 1664
AF ILLUMINA-E6F4B9:7:118:6538:2018#0/1 U 1664
AF ILLUMINA-E6F4B9:7:9:12509:9948#0/1 U 1665
AF ILLUMINA-E6F4B9:7:10:16914:15205#0/1 U 1665
AF ILLUMINA-E6F4B9:7:12:5330:16935#0/1 U 1665
AF ILLUMINA-E6F4B9:7:24:12396:1232#0/1 U 1665
AF ILLUMINA-E6F4B9:7:32:17027:3322#0/1 U 1665
AF ILLUMINA-E6F4B9:7:33:13939:8647#0/1 U 1665
AF ILLUMINA-E6F4B9:7:38:16961:17646#0/1 U 1665
AF ILLUMINA-E6F4B9:7:40:14936:9624#0/1 U 1665
AF ILLUMINA-E6F4B9:7:43:8210:18689#0/1 U 1665
AF ILLUMINA-E6F4B9:7:65:7840:13267#0/1 U 1665
AF ILLUMINA-E6F4B9:7:67:9122:17971#0/1 U 1665
AF ILLUMINA-E6F4B9:7:68:5469:17016#0/1 U 1665
AF ILLUMINA-E6F4B9:7:76:11856:14358#0/1 U 1665
AF ILLUMINA-E6F4B9:7:79:19000:10903#0/1 U 1665
AF ILLUMINA-E6F4B9:7:88:14942:3631#0/1 U 1665
AF ILLUMINA-E6F4B9:7:97:13248:21032#0/1 U 1665
AF ILLUMINA-E6F4B9:7:98:5332:6611#0/1 U 1665
AF ILLUMINA-E6F4B9:7:107:3804:17994#0/1 U 1665
AF ILLUMINA-E6F4B9:7:33:16595:5922#0/1 U 1666
AF ILLUMINA-E6F4B9:7:38:5793:3310#0/1 U 1666
AF ILLUMINA-E6F4B9:7:67:6335:7820#0/1 U 1666
AF ILLUMINA-E6F4B9:7:79:5099:4020#0/1 U 1666
AF ILLUMINA-E6F4B9:7:96:6289:8900#0/1 U 1666
AF ILLUMINA-E6F4B9:7:102:7071:11090#0/1 U 1666
AF ILLUMINA-E6F4B9:7:105:12422:1413#0/1 U 1666
AF ILLUMINA-E6F4B9:7:107:10474:6479#0/1 U 1667
AF ILLUMINA-E6F4B9:7:6:14771:3176#0/1 U 1666
AF ILLUMINA-E6F4B9:7:2:11288:3842#0/1 U 1668
AF ILLUMINA-E6F4B9:7:17:8574:20719#0/1 U 1668
AF ILLUMINA-E6F4B9:7:6:13099:13206#0/1 U 1669
AF ILLUMINA-E6F4B9:7:73:4529:11853#0/1 U 1679
AF ILLUMINA-E6F4B9:7:53:3272:16258#0/1 C 1681
AF ILLUMINA-E6F4B9:7:60:16561:3605#0/1 U 1686
AF ILLUMINA-E6F4B9:7:94:15114:14480#0/1 U 1687
AF ILLUMINA-E6F4B9:7:25:10516:10656#0/1 U 1688
AF ILLUMINA-E6F4B9:7:5:9793:10994#0/1 U 1689
AF ILLUMINA-E6F4B9:7:43:12442:5572#0/1 U 1689
AF ILLUMINA-E6F4B9:7:43:19201:20254#0/1 U 1689
AF ILLUMINA-E6F4B9:7:1:11948:15107#0/1 U 1690
AF ILLUMINA-E6F4B9:7:4:2383:9342#0/1 U 1690
AF ILLUMINA-E6F4B9:7:27:4318:9949#0/1 U 1690
AF ILLUMINA-E6F4B9:7:46:4824:9938#0/1 U 1690
AF ILLUMINA-E6F4B9:7:84:15873:2239#0/1 U 1690
AF ILLUMINA-E6F4B9:7:92:16839:14426#0/1 U 1690
AF ILLUMINA-E6F4B9:7:118:10202:14547#0/1 U 1690
AF ILLUMINA-E6F4B9:7:53:7541:11968#0/1 U 1691
AF ILLUMINA-E6F4B9:7:72:2747:5463#0/1 U 1691
AF ILLUMINA-E6F4B9:7:81:10004:14854#0/1 U 1691
AF ILLUMINA-E6F4B9:7:111:19315:9117#0/1 U 1691
AF ILLUMINA-E6F4B9:7:29:16935:5700#0/1 U 1692
AF ILLUMINA-E6F4B9:7:4:18606:5510#0/1 U 1693
AF ILLUMINA-E6F4B9:7:8:2604:13067#0/1 U 1693
AF ILLUMINA-E6F4B9:7:9:18904:4657#0/1 U 1693
AF ILLUMINA-E6F4B9:7:43:19758:4637#0/1 U 1693
AF ILLUMINA-E6F4B9:7:90:6267:15854#0/1 U 1693
AF ILLUMINA-E6F4B9:7:113:16614:9493#0/1 U 1693
AF ILLUMINA-E6F4B9:7:116:4280:3834#0/1 U 1693
AF ILLUMINA-E6F4B9:7:5:2389:20069#0/1 U 1694
AF ILLUMINA-E6F4B9:7:10:12634:16963#0/1 U 1694
AF ILLUMINA-E6F4B9:7:13:2561:6587#0/1 U 1694
AF ILLUMINA-E6F4B9:7:41:13740:18595#0/1 U 1694
AF ILLUMINA-E6F4B9:7:43:14025:7375#0/1 U 1694
AF ILLUMINA-E6F4B9:7:51:7468:15167#0/1 U 1694
AF ILLUMINA-E6F4B9:7:58:9067:12858#0/1 U 1694
AF ILLUMINA-E6F4B9:7:64:15217:5229#0/1 U 1694
AF ILLUMINA-E6F4B9:7:74:8903:4646#0/1 U 1694
AF ILLUMINA-E6F4B9:7:81:1794:2230#0/1 U 1694
AF ILLUMINA-E6F4B9:7:86:14458:1111#0/1 U 1694
AF ILLUMINA-E6F4B9:7:119:8360:7511#0/1 U 1694
AF ILLUMINA-E6F4B9:7:75:13307:14653#0/1 U 1695
AF ILLUMINA-E6F4B9:7:106:13501:1139#0/1 U 1695
AF ILLUMINA-E6F4B9:7:113:1862:5059#0/1 U 1719
AF ILLUMINA-E6F4B9:7:82:13342:11412#0/1 U 1727
AF ILLUMINA-E6F4B9:7:100:18340:9213#0/1 C 1737
AF ILLUMINA-E6F4B9:7:29:18950:7999#0/1 C 1738
AF ILLUMINA-E6F4B9:7:93:4110:14141#0/1 C 1738
AF ILLUMINA-E6F4B9:7:29:13472:11837#0/1 C 1741
AF ILLUMINA-E6F4B9:7:35:4699:18304#0/1 C 1741
AF ILLUMINA-E6F4B9:7:10:14337:14027#0/1 U 1745
AF ILLUMINA-E6F4B9:7:97:5643:16413#0/1 U 1752
AF ILLUMINA-E6F4B9:7:100:4123:6687#0/1 U 1752
AF ILLUMINA-E6F4B9:7:34:9363:18063#0/1 U 1754
AF ILLUMINA-E6F4B9:7:79:15184:5659#0/1 U 1756
AF ILLUMINA-E6F4B9:7:7:3574:7759#0/1 U 1759
AF ILLUMINA-E6F4B9:7:47:18880:10137#0/1 U 1759
AF ILLUMINA-E6F4B9:7:1:4118:1755#0/1 C 1767
AF ILLUMINA-E6F4B9:7:27:4599:13514#0/1 C 1767
AF ILLUMINA-E6F4B9:7:115:13973:10884#0/1 U 1783
AF ILLUMINA-E6F4B9:7:16:18741:1881#0/1 U 1787
AF ILLUMINA-E6F4B9:7:56:10721:10565#0/1 U 1787
AF ILLUMINA-E6F4B9:7:78:5864:13556#0/1 U 1787
AF ILLUMINA-E6F4B9:7:59:2016:20314#0/1 U 1789
AF ILLUMINA-E6F4B9:7:73:11513:19978#0/1 U 1789
AF ILLUMINA-E6F4B9:7:80:2668:6238#0/1 U 1789
AF ILLUMINA-E6F4B9:7:82:7685:7182#0/1 U 1789
AF ILLUMINA-E6F4B9:7:3:4560:6847#0/1 U 1790
AF ILLUMINA-E6F4B9:7:21:11823:15892#0/1 U 1790
AF ILLUMINA-E6F4B9:7:26:15120:7662#0/1 U 1790
AF ILLUMINA-E6F4B9:7:28:19318:14526#0/1 U 1790
AF ILLUMINA-E6F4B9:7:48:11465:13270#0/1 U 1790
AF ILLUMINA-E6F4B9:7:72:11649:9936#0/1 U 1790
AF ILLUMINA-E6F4B9:7:84:3163:5368#0/1 U 1790
AF ILLUMINA-E6F4B9:7:87:14048:7890#0/1 U 1790
AF ILLUMINA-E6F4B9:7:93:9550:1835#0/1 U 1790
AF ILLUMINA-E6F4B9:7:107:18395:18241#0/1 U 1790
AF ILLUMINA-E6F4B9:7:28:1128:19691#0/1 U 1791
AF ILLUMINA-E6F4B9:7:34:3951:18466#0/1 U 1791
AF ILLUMINA-E6F4B9:7:35:19452:12964#0/1 U 1791
AF ILLUMINA-E6F4B9:7:38:17938:11079#0/1 U 1791
AF ILLUMINA-E6F4B9:7:52:16844:5589#0/1 U 1791
AF ILLUMINA-E6F4B9:7:57:1562:4041#0/1 U 1791
AF ILLUMINA-E6F4B9:7:88:12989:6699#0/1 U 1791
AF ILLUMINA-E6F4B9:7:108:16424:18246#0/1 U 1791
AF ILLUMINA-E6F4B9:7:110:6463:13266#0/1 U 1791
AF ILLUMINA-E6F4B9:7:116:17481:17081#0/1 U 1791
AF ILLUMINA-E6F4B9:7:120:9532:7413#0/1 U 1791
AF ILLUMINA-E6F4B9:7:58:11440:966#0/1 U 1789
AF ILLUMINA-E6F4B9:7:13:6317:17257#0/1 U 1792
AF ILLUMINA-E6F4B9:7:17:14653:11207#0/1 U 1792
AF ILLUMINA-E6F4B9:7:43:13633:3399#0/1 U 1792
AF ILLUMINA-E6F4B9:7:55:7208:4529#0/1 U 1792
AF ILLUMINA-E6F4B9:7:56:14176:20142#0/1 U 1792
AF ILLUMINA-E6F4B9:7:60:8047:11946#0/1 U 1792
AF ILLUMINA-E6F4B9:7:98:5221:13278#0/1 U 1792
AF ILLUMINA-E6F4B9:7:101:17727:10179#0/1 U 1792
AF ILLUMINA-E6F4B9:7:103:16129:19553#0/1 U 1792
AF ILLUMINA-E6F4B9:7:118:7899:3546#0/1 U 1792
AF ILLUMINA-E6F4B9:7:5:5757:16962#0/1 U 1793
AF ILLUMINA-E6F4B9:7:42:7322:13489#0/1 U 1793
AF ILLUMINA-E6F4B9:7:46:3737:1378#0/1 U 1793
AF ILLUMINA-E6F4B9:7:63:9588:17468#0/1 U 1793
AF ILLUMINA-E6F4B9:7:64:4257:14240#0/1 U 1793
AF ILLUMINA-E6F4B9:7:65:11512:16801#0/1 U 1793
AF ILLUMINA-E6F4B9:7:76:7923:12140#0/1 U 1793
AF ILLUMINA-E6F4B9:7:89:16984:5387#0/1 U 1793
AF ILLUMINA-E6F4B9:7:112:11184:11229#0/1 U 1793
AF ILLUMINA-E6F4B9:7:10:2069:18051#0/1 U 1793
AF ILLUMINA-E6F4B9:7:30:12694:7166#0/1 U 1793
AF ILLUMINA-E6F4B9:7:14:7967:12891#0/1 U 1794
AF ILLUMINA-E6F4B9:7:31:12407:7129#0/1 U 1794
AF ILLUMINA-E6F4B9:7:50:12866:5956#0/1 U 1794
AF ILLUMINA-E6F4B9:7:55:13032:5033#0/1 U 1794
AF ILLUMINA-E6F4B9:7:69:14237:19186#0/1 U 1794
AF ILLUMINA-E6F4B9:7:89:11768:21246#0/1 U 1794
AF ILLUMINA-E6F4B9:7:90:16443:5690#0/1 U 1794
AF ILLUMINA-E6F4B9:7:92:13090:6269#0/1 U 1794
AF ILLUMINA-E6F4B9:7:94:10900:10772#0/1 U 1794
AF ILLUMINA-E6F4B9:7:105:15862:11371#0/1 U 1794
AF ILLUMINA-E6F4B9:7:106:10042:17858#0/1 U 1794
AF ILLUMINA-E6F4B9:7:118:11401:11778#0/1 U 1794
AF ILLUMINA-E6F4B9:7:77:10522:6170#0/1 U 1795
AF ILLUMINA-E6F4B9:7:83:11767:21082#0/1 U 1795
AF ILLUMINA-E6F4B9:7:102:12611:11178#0/1 U 1795
AF ILLUMINA-E6F4B9:7:40:16851:1278#0/1 U 1794
AF ILLUMINA-E6F4B9:7:19:5238:21195#0/1 U 1796
AF ILLUMINA-E6F4B9:7:102:15647:19978#0/1 U 1796
AF ILLUMINA-E6F4B9:7:95:19129:6557#0/1 U 1797
AF ILLUMINA-E6F4B9:7:14:1636:13921#0/1 U 1793
AF ILLUMINA-E6F4B9:7:119:5705:18506#0/1 U 1798
AF ILLUMINA-E6F4B9:7:14:14673:17881#0/1 C 1799
AF ILLUMINA-E6F4B9:7:36:18298:1569#0/1 U 1799
AF ILLUMINA-E6F4B9:7:52:12067:18484#0/1 U 1801
AF ILLUMINA-E6F4B9:7:69:17899:5492#0/1 U 1804
AF ILLUMINA-E6F4B9:7:31:8181:17534#0/1 U 1805
AF ILLUMINA-E6F4B9:7:90:18312:4137#0/1 U 1805
AF ILLUMINA-E6F4B9:7:49:11700:16563#0/1 U 1805
AF ILLUMINA-E6F4B9:7:85:17278:7063#0/1 U 1806
AF ILLUMINA-E6F4B9:7:8:17785:20332#0/1 U 1807
AF ILLUMINA-E6F4B9:7:104:16777:18207#0/1 C 1812
AF ILLUMINA-E6F4B9:7:22:10861:13203#0/1 C 1860
AF ILLUMINA-E6F4B9:7:6:6928:8735#0/1 U 1857
AF ILLUMINA-E6F4B9:7:30:3524:1201#0/1 U 1857
AF ILLUMINA-E6F4B9:7:5:4577:11975#0/1 U 1876
AF ILLUMINA-E6F4B9:7:9:8041:9573#0/1 U 1877
AF ILLUMINA-E6F4B9:7:50:8579:5023#0/1 U 1883
AF ILLUMINA-E6F4B9:7:45:10527:10637#0/1 C 1886
AF ILLUMINA-E6F4B9:7:48:18653:13323#0/1 U 1928
AF ILLUMINA-E6F4B9:7:14:16581:17390#0/1 U 1929
AF ILLUMINA-E6F4B9:7:43:9182:12457#0/1 U 1954
AF ILLUMINA-E6F4B9:7:63:10609:7100#0/1 U 1961
AF ILLUMINA-E6F4B9:7:92:9602:9184#0/1 U 1963
AF ILLUMINA-E6F4B9:7:39:18411:20626#0/1 U 1968
AF ILLUMINA-E6F4B9:7:52:10911:20445#0/1 U 2012
AF ILLUMINA-E6F4B9:7:88:1771:2208#0/1 U 2019
AF ILLUMINA-E6F4B9:7:76:18873:3536#0/1 C 2092
AF ILLUMINA-E6F4B9:7:79:18013:5683#0/1 U 2122
AF ILLUMINA-E6F4B9:7:112:1135:1773#0/1 U 2141
AF ILLUMINA-E6F4B9:7:3:19540:1925#0/1 C 2144
AF ILLUMINA-E6F4B9:7:21:2798:17927#0/1 U 2156
AF ILLUMINA-E6F4B9:7:34:16645:20998#0/1 C 2160
AF ILLUMINA-E6F4B9:7:38:13261:20574#0/1 C 2160
AF ILLUMINA-E6F4B9:7:93:5220:18218#0/1 C 2160
AF ILLUMINA-E6F4B9:7:118:18224:14750#0/1 C 2160
AF ILLUMINA-E6F4B9:7:41:4045:13328#0/1 C 2161
AF ILLUMINA-E6F4B9:7:13:4305:16431#0/1 C 2163
AF ILLUMINA-E6F4B9:7:48:4991:3328#0/1 U 2163
AF ILLUMINA-E6F4B9:7:64:4388:3401#0/1 U 2171
AF ILLUMINA-E6F4B9:7:113:12796:4812#0/1 U 2174
AF ILLUMINA-E6F4B9:7:103:9850:16763#0/1 C 2176
AF ILLUMINA-E6F4B9:7:33:1922:13479#0/1 C 2177
AF ILLUMINA-E6F4B9:7:63:4959:18606#0/1 U 2184
AF ILLUMINA-E6F4B9:7:72:16857:11601#0/1 U 2186
AF ILLUMINA-E6F4B9:7:32:6488:14342#0/1 C 2188
AF ILLUMINA-E6F4B9:7:119:10964:15985#0/1 C 2188
AF ILLUMINA-E6F4B9:7:39:18178:11416#0/1 U 2215
AF ILLUMINA-E6F4B9:7:9:5764:9976#0/1 U 2216
AF ILLUMINA-E6F4B9:7:50:17392:5451#0/1 U 2219
AF ILLUMINA-E6F4B9:7:30:13953:3229#0/1 U 2228
AF ILLUMINA-E6F4B9:7:74:15183:15273#0/1 U 2228
AF ILLUMINA-E6F4B9:7:2:4290:4067#0/1 U 2229
AF ILLUMINA-E6F4B9:7:34:2658:1459#0/1 U 2229
AF ILLUMINA-E6F4B9:7:21:18599:18251#0/1 U 2231
AF ILLUMINA-E6F4B9:7:26:4293:12178#0/1 C 2231
AF ILLUMINA-E6F4B9:7:38:7903:5416#0/1 U 2231
AF ILLUMINA-E6F4B9:7:51:7225:10582#0/1 C 2231
AF ILLUMINA-E6F4B9:7:58:17060:16000#0/1 C 2231
AF ILLUMINA-E6F4B9:7:102:14271:4168#0/1 C 2231
AF ILLUMINA-E6F4B9:7:37:1857:6693#0/1 U 2233
AF ILLUMINA-E6F4B9:7:62:11047:19610#0/1 U 2233
AF ILLUMINA-E6F4B9:7:79:6491:17654#0/1 U 2234
AF ILLUMINA-E6F4B9:7:80:8155:2601#0/1 U 2234
AF ILLUMINA-E6F4B9:7:94:18332:11804#0/1 U 2234
AF ILLUMINA-E6F4B9:7:16:12359:18736#0/1 U 2235
AF ILLUMINA-E6F4B9:7:70:15879:6979#0/1 C 2235
AF ILLUMINA-E6F4B9:7:100:15553:18815#0/1 U 2235
AF ILLUMINA-E6F4B9:7:118:5298:9041#0/1 U 2235
AF ILLUMINA-E6F4B9:7:4:2785:7796#0/1 U 2236
AF ILLUMINA-E6F4B9:7:32:8464:14358#0/1 U 2236
AF ILLUMINA-E6F4B9:7:106:4842:18029#0/1 U 2237
AF ILLUMINA-E6F4B9:7:17:18281:7226#0/1 U 2237
AF ILLUMINA-E6F4B9:7:99:14308:12771#0/1 U 2238
AF ILLUMINA-E6F4B9:7:22:2209:15974#0/1 U 2239
AF ILLUMINA-E6F4B9:7:33:9849:19551#0/1 U 2239
AF ILLUMINA-E6F4B9:7:80:17298:16123#0/1 U 2239
AF ILLUMINA-E6F4B9:7:87:17821:3688#0/1 U 2239
AF ILLUMINA-E6F4B9:7:88:1818:20937#0/1 U 2239
AF ILLUMINA-E6F4B9:7:35:11482:8197#0/1 U 2240
AF ILLUMINA-E6F4B9:7:37:12256:8440#0/1 U 2240
AF ILLUMINA-E6F4B9:7:44:17606:16946#0/1 U 2240
AF ILLUMINA-E6F4B9:7:57:4970:17204#0/1 U 2240
AF ILLUMINA-E6F4B9:7:66:18500:13829#0/1 U 2240
AF ILLUMINA-E6F4B9:7:107:16406:5852#0/1 U 2240
AF ILLUMINA-E6F4B9:7:23:15870:15927#0/1 C 2241
AF ILLUMINA-E6F4B9:7:94:7709:3051#0/1 U 2241
AF ILLUMINA-E6F4B9:7:119:6511:12479#0/1 U 2241
AF ILLUMINA-E6F4B9:7:2:8578:5213#0/1 U 2242
AF ILLUMINA-E6F4B9:7:24:7181:11056#0/1 U 2243
AF ILLUMINA-E6F4B9:7:41:17367:20365#0/1 U 2243
AF ILLUMINA-E6F4B9:7:57:15258:16586#0/1 U 2243
AF ILLUMINA-E6F4B9:7:75:5402:1749#0/1 C 2243
AF ILLUMINA-E6F4B9:7:81:10121:4279#0/1 U 2243
AF ILLUMINA-E6F4B9:7:91:7445:21282#0/1 U 2243
AF ILLUMINA-E6F4B9:7:92:11615:1308#0/1 U 2243
AF ILLUMINA-E6F4B9:7:94:10002:17432#0/1 U 2243
AF ILLUMINA-E6F4B9:7:103:4784:10976#0/1 U 2243
AF ILLUMINA-E6F4B9:7:39:15892:13745#0/1 U 2244
AF ILLUMINA-E6F4B9:7:75:14740:16147#0/1 U 2244
AF ILLUMINA-E6F4B9:7:1:4723:15498#0/1 U 2291
AF ILLUMINA-E6F4B9:7:53:11911:13713#0/1 U 2294
AF ILLUMINA-E6F4B9:7:15:1332:2829#0/1 U 2295
AF ILLUMINA-E6F4B9:7:62:7798:13700#0/1 U 2295
AF ILLUMINA-E6F4B9:7:76:17362:13210#0/1 U 2295
AF ILLUMINA-E6F4B9:7:76:13370:15993#0/1 U 2295
AF ILLUMINA-E6F4B9:7:84:12015:10829#0/1 U 2295
AF ILLUMINA-E6F4B9:7:95:9466:12519#0/1 U 2295
AF ILLUMINA-E6F4B9:7:98:11380:11933#0/1 U 2295
AF ILLUMINA-E6F4B9:7:31:2230:15751#0/1 U 2299
AF ILLUMINA-E6F4B9:7:105:18526:19673#0/1 U 2299
AF ILLUMINA-E6F4B9:7:106:14991:16006#0/1 U 2299
AF ILLUMINA-E6F4B9:7:45:12561:13777#0/1 U 2300
AF ILLUMINA-E6F4B9:7:108:5138:5166#0/1 U 2301
AF ILLUMINA-E6F4B9:7:94:3135:7163#0/1 U 2302
AF ILLUMINA-E6F4B9:7:33:18779:18825#0/1 U 2303
AF ILLUMINA-E6F4B9:7:9:18369:4709#0/1 U 2303
AF ILLUMINA-E6F4B9:7:2:9335:6182#0/1 U 2304
AF ILLUMINA-E6F4B9:7:5:10576:15159#0/1 U 2304
AF ILLUMINA-E6F4B9:7:13:6523:16794#0/1 U 2304
AF ILLUMINA-E6F4B9:7:49:1933:1466#0/1 U 2304
AF ILLUMINA-E6F4B9:7:62:7817:8992#0/1 U 2304
AF ILLUMINA-E6F4B9:7:73:7694:18682#0/1 U 2304
AF ILLUMINA-E6F4B9:7:79:6881:11580#0/1 U 2304
AF ILLUMINA-E6F4B9:7:79:9815:13950#0/1 U 2304
AF ILLUMINA-E6F4B9:7:16:7833:2628#0/1 U 2305
AF ILLUMINA-E6F4B9:7:51:2852:7210#0/1 U 2305
AF ILLUMINA-E6F4B9:7:67:18996:6038#0/1 U 2305
AF ILLUMINA-E6F4B9:7:67:3961:16806#0/1 U 2305
AF ILLUMINA-E6F4B9:7:86:4675:6250#0/1 U 2305
AF ILLUMINA-E6F4B9:7:87:10631:16214#0/1 U 2305
AF ILLUMINA-E6F4B9:7:92:10283:18793#0/1 U 2305
AF ILLUMINA-E6F4B9:7:95:7312:8838#0/1 U 2305
AF ILLUMINA-E6F4B9:7:100:5843:19703#0/1 U 2305
AF ILLUMINA-E6F4B9:7:104:4443:1893#0/1 U 2305
AF ILLUMINA-E6F4B9:7:58:14205:8168#0/1 U 2304
AF ILLUMINA-E6F4B9:7:3:2686:7962#0/1 U 2306
AF ILLUMINA-E6F4B9:7:84:13923:4618#0/1 U 2306
AF ILLUMINA-E6F4B9:7:78:5520:8518#0/1 U 2307
AF ILLUMINA-E6F4B9:7:83:12879:10693#0/1 U 2308
AF ILLUMINA-E6F4B9:7:4:9202:6197#0/1 U 2311
AF ILLUMINA-E6F4B9:7:88:16633:15774#0/1 U 2311
AF ILLUMINA-E6F4B9:7:41:11178:8097#0/1 U 2312
AF ILLUMINA-E6F4B9:7:102:12617:9116#0/1 U 2318
AF ILLUMINA-E6F4B9:7:112:12919:4889#0/1 U 2318
AF ILLUMINA-E6F4B9:7:112:9219:11214#0/1 U 2318
AF ILLUMINA-E6F4B9:7:47:14478:8518#0/1 U 2322
AF ILLUMINA-E6F4B9:7:68:19400:9588#0/1 C 2326
AF ILLUMINA-E6F4B9:7:38:4892:15993#0/1 C 2328
AF ILLUMINA-E6F4B9:7:65:8710:13110#0/1 C 2328
AF ILLUMINA-E6F4B9:7:112:3321:19493#0/1 C 2328
AF ILLUMINA-E6F4B9:7:80:12704:19188#0/1 C 2340
AF ILLUMINA-E6F4B9:7:111:15666:3593#0/1 C 2345
AF ILLUMINA-E6F4B9:7:118:9547:20065#0/1 C 2345
AF ILLUMINA-E6F4B9:7:15:7006:2214#0/1 U 2346
AF ILLUMINA-E6F4B9:7:119:17551:14045#0/1 U 2365
AF ILLUMINA-E6F4B9:7:41:18361:20283#0/1 U 2423
AF ILLUMINA-E6F4B9:7:104:7744:16462#0/1 U 2424
AF ILLUMINA-E6F4B9:7:114:8748:6931#0/1 U 2425
AF ILLUMINA-E6F4B9:7:30:5445:8169#0/1 C 2440
AF ILLUMINA-E6F4B9:7:37:8990:7501#0/1 C 2440
AF ILLUMINA-E6F4B9:7:79:4784:7979#0/1 U 2470
AF ILLUMINA-E6F4B9:7:34:2272:10742#0/1 U 2476
AF ILLUMINA-E6F4B9:7:55:11251:15988#0/1 U 2476
AF ILLUMINA-E6F4B9:7:6:14928:2800#0/1 C 2477
AF ILLUMINA-E6F4B9:7:43:16699:21162#0/1 U 2477
AF ILLUMINA-E6F4B9:7:82:10994:7340#0/1 U 2477
AF ILLUMINA-E6F4B9:7:85:19274:13639#0/1 U 2477
AF ILLUMINA-E6F4B9:7:104:5882:7270#0/1 U 2477
AF ILLUMINA-E6F4B9:7:2:2465:10968#0/1 C 2478
AF ILLUMINA-E6F4B9:7:24:18744:7895#0/1 U 2478
AF ILLUMINA-E6F4B9:7:104:9740:17575#0/1 U 2478
AF ILLUMINA-E6F4B9:7:34:8346:11762#0/1 U 2479
AF ILLUMINA-E6F4B9:7:87:6310:16155#0/1 U 2479
AF ILLUMINA-E6F4B9:7:35:19151:10732#0/1 U 2480
AF ILLUMINA-E6F4B9:7:65:10102:12135#0/1 U 2480
AF ILLUMINA-E6F4B9:7:13:5018:4012#0/1 U 2481
AF ILLUMINA-E6F4B9:7:26:11075:17971#0/1 U 2481
AF ILLUMINA-E6F4B9:7:49:19652:12608#0/1 U 2481
AF ILLUMINA-E6F4B9:7:51:13713:2929#0/1 U 2481
AF ILLUMINA-E6F4B9:7:83:2131:2746#0/1 U 2481
AF ILLUMINA-E6F4B9:7:86:5569:5008#0/1 U 2481
AF ILLUMINA-E6F4B9:7:83:15924:9384#0/1 U 2481
AF ILLUMINA-E6F4B9:7:3:5413:3019#0/1 U 2482
AF ILLUMINA-E6F4B9:7:7:5159:1735#0/1 U 2482
AF ILLUMINA-E6F4B9:7:36:1118:6613#0/1 U 2483
AF ILLUMINA-E6F4B9:7:47:5379:18436#0/1 U 2483
AF ILLUMINA-E6F4B9:7:52:14560:8751#0/1 U 2483
AF ILLUMINA-E6F4B9:7:75:19224:14743#0/1 U 2483
AF ILLUMINA-E6F4B9:7:110:6934:15725#0/1 U 2483
AF ILLUMINA-E6F4B9:7:75:11579:20715#0/1 U 2484
AF ILLUMINA-E6F4B9:7:60:14080:18029#0/1 U 2486
AF ILLUMINA-E6F4B9:7:62:7605:12382#0/1 U 2486
AF ILLUMINA-E6F4B9:7:67:11088:7451#0/1 U 2486
AF ILLUMINA-E6F4B9:7:68:2861:9121#0/1 C 2486
AF ILLUMINA-E6F4B9:7:70:1373:18947#0/1 C 2486
AF ILLUMINA-E6F4B9:7:105:5341:17146#0/1 U 2486
AF ILLUMINA-E6F4B9:7:84:2686:1312#0/1 C 2487
AF ILLUMINA-E6F4B9:7:33:1297:5356#0/1 C 2488
AF ILLUMINA-E6F4B9:7:16:18641:1605#0/1 C 2490
AF ILLUMINA-E6F4B9:7:109:4957:20723#0/1 U 2490
AF ILLUMINA-E6F4B9:7:33:2696:5565#0/1 C 2489
AF ILLUMINA-E6F4B9:7:49:5762:1961#0/1 U 2493
AF ILLUMINA-E6F4B9:7:8:6519:21038#0/1 C 2494
AF ILLUMINA-E6F4B9:7:78:12231:14982#0/1 C 2494
AF ILLUMINA-E6F4B9:7:101:7133:3073#0/1 U 2503
AF ILLUMINA-E6F4B9:7:80:17806:5360#0/1 U 2505
AF ILLUMINA-E6F4B9:7:90:17380:9305#0/1 U 2505
AF ILLUMINA-E6F4B9:7:92:7476:4425#0/1 U 2506
AF ILLUMINA-E6F4B9:7:4:3041:8610#0/1 U 2517
AF ILLUMINA-E6F4B9:7:37:1581:14497#0/1 U 2523
AF ILLUMINA-E6F4B9:7:65:5994:15086#0/1 U 2523
AF ILLUMINA-E6F4B9:7:35:16330:21097#0/1 U 2551
AF ILLUMINA-E6F4B9:7:70:1614:16536#0/1 U 2553
AF ILLUMINA-E6F4B9:7:115:9006:1368#0/1 U 2556
AF ILLUMINA-E6F4B9:7:106:2658:18334#0/1 U 2558
AF ILLUMINA-E6F4B9:7:110:17402:3044#0/1 U 2558
AF ILLUMINA-E6F4B9:7:62:12195:7365#0/1 U 2564
AF ILLUMINA-E6F4B9:7:16:11279:6472#0/1 U 2563
AF ILLUMINA-E6F4B9:7:21:8251:9640#0/1 U 2565
AF ILLUMINA-E6F4B9:7:36:11694:8242#0/1 U 2565
AF ILLUMINA-E6F4B9:7:79:15960:11218#0/1 U 2568
AF ILLUMINA-E6F4B9:7:21:17055:6030#0/1 U 2579
AF ILLUMINA-E6F4B9:7:24:3681:18914#0/1 U 2581
AF ILLUMINA-E6F4B9:7:111:13673:14714#0/1 U 2581
AF ILLUMINA-E6F4B9:7:99:16144:1371#0/1 U 2588
AF ILLUMINA-E6F4B9:7:104:8185:18534#0/1 U 2591
AF ILLUMINA-E6F4B9:7:85:13925:5785#0/1 U 2593
AF ILLUMINA-E6F4B9:7:99:12707:4934#0/1 U 2614
AF ILLUMINA-E6F4B9:7:68:2951:15429#0/1 U 2615
AF ILLUMINA-E6F4B9:7:79:9142:4019#0/1 U 2615
AF ILLUMINA-E6F4B9:7:60:15457:13247#0/1 U 2616
AF ILLUMINA-E6F4B9:7:21:9780:1565#0/1 U 2620
AF ILLUMINA-E6F4B9:7:113:1307:12192#0/1 U 2621
AF ILLUMINA-E6F4B9:7:106:4207:20966#0/1 U 2623
AF ILLUMINA-E6F4B9:7:42:9144:20975#0/1 C 2624
AF ILLUMINA-E6F4B9:7:107:6137:19711#0/1 U 2624
AF ILLUMINA-E6F4B9:7:38:8639:17360#0/1 U 2628
AF ILLUMINA-E6F4B9:7:84:8218:15203#0/1 U 2632
AF ILLUMINA-E6F4B9:7:100:11959:18784#0/1 U 2652
AF ILLUMINA-E6F4B9:7:26:4728:9381#0/1 U 2658
AF ILLUMINA-E6F4B9:7:103:1109:17790#0/1 U 2659
AF ILLUMINA-E6F4B9:7:69:13826:1211#0/1 U 2661
AF ILLUMINA-E6F4B9:7:96:13764:20791#0/1 U 2661
AF ILLUMINA-E6F4B9:7:99:3045:11731#0/1 U 2661
AF ILLUMINA-E6F4B9:7:103:6934:12835#0/1 U 2661
AF ILLUMINA-E6F4B9:7:104:2717:5275#0/1 U 2661
AF ILLUMINA-E6F4B9:7:13:5595:15095#0/1 U 2662
AF ILLUMINA-E6F4B9:7:24:18546:18514#0/1 U 2662
AF ILLUMINA-E6F4B9:7:27:4775:17149#0/1 U 2662
AF ILLUMINA-E6F4B9:7:65:5186:15424#0/1 U 2662
AF ILLUMINA-E6F4B9:7:66:12885:21013#0/1 U 2662
AF ILLUMINA-E6F4B9:7:76:14150:19638#0/1 U 2662
AF ILLUMINA-E6F4B9:7:84:9109:8452#0/1 U 2662
AF ILLUMINA-E6F4B9:7:91:6902:12488#0/1 U 2662
AF ILLUMINA-E6F4B9:7:94:4416:6647#0/1 U 2662
AF ILLUMINA-E6F4B9:7:96:8371:14833#0/1 U 2662
AF ILLUMINA-E6F4B9:7:103:5865:9007#0/1 U 2662
AF ILLUMINA-E6F4B9:7:15:11269:13422#0/1 U 2663
AF ILLUMINA-E6F4B9:7:20:2984:2168#0/1 U 2663
AF ILLUMINA-E6F4B9:7:30:11312:9179#0/1 U 2663
AF ILLUMINA-E6F4B9:7:51:2546:6415#0/1 U 2663
AF ILLUMINA-E6F4B9:7:77:9906:2916#0/1 U 2663
AF ILLUMINA-E6F4B9:7:92:16484:6928#0/1 U 2663
AF ILLUMINA-E6F4B9:7:96:1273:16755#0/1 U 2663
AF ILLUMINA-E6F4B9:7:99:6756:9346#0/1 U 2663
AF ILLUMINA-E6F4B9:7:110:17723:15491#0/1 U 2663
AF ILLUMINA-E6F4B9:7:115:2736:7383#0/1 U 2663
AF ILLUMINA-E6F4B9:7:117:16959:13230#0/1 U 2663
AF ILLUMINA-E6F4B9:7:9:17361:6345#0/1 U 2664
AF ILLUMINA-E6F4B9:7:41:16828:7560#0/1 U 2664
AF ILLUMINA-E6F4B9:7:49:15914:17311#0/1 U 2664
AF ILLUMINA-E6F4B9:7:52:13061:20786#0/1 U 2664
AF ILLUMINA-E6F4B9:7:58:2785:19929#0/1 U 2664
AF ILLUMINA-E6F4B9:7:79:1313:11215#0/1 U 2664
AF ILLUMINA-E6F4B9:7:86:18232:17853#0/1 U 2664
AF ILLUMINA-E6F4B9:7:87:19165:13161#0/1 U 2664
AF ILLUMINA-E6F4B9:7:88:9265:4544#0/1 U 2664
AF ILLUMINA-E6F4B9:7:114:12656:2213#0/1 U 2664
AF ILLUMINA-E6F4B9:7:6:9928:8239#0/1 U 2665
AF ILLUMINA-E6F4B9:7:8:3730:5803#0/1 U 2665
AF ILLUMINA-E6F4B9:7:11:8922:4364#0/1 U 2665
AF ILLUMINA-E6F4B9:7:11:6697:18114#0/1 U 2665
AF ILLUMINA-E6F4B9:7:15:6154:6764#0/1 U 2665
AF ILLUMINA-E6F4B9:7:18:2790:18740#0/1 U 2665
AF ILLUMINA-E6F4B9:7:24:8173:2558#0/1 U 2665
AF ILLUMINA-E6F4B9:7:24:3682:17779#0/1 U 2665
AF ILLUMINA-E6F4B9:7:25:18199:13980#0/1 U 2665
AF ILLUMINA-E6F4B9:7:29:14912:7721#0/1 U 2665
AF ILLUMINA-E6F4B9:7:35:10522:20732#0/1 U 2665
AF ILLUMINA-E6F4B9:7:36:14388:19199#0/1 U 2665
AF ILLUMINA-E6F4B9:7:41:3461:7533#0/1 U 2665
AF ILLUMINA-E6F4B9:7:42:10685:11913#0/1 U 2665
AF ILLUMINA-E6F4B9:7:48:8150:19811#0/1 U 2665
AF ILLUMINA-E6F4B9:7:51:2440:3242#0/1 U 2665
AF ILLUMINA-E6F4B9:7:56:1649:12928#0/1 U 2665
AF ILLUMINA-E6F4B9:7:57:18456:18234#0/1 U 2665
AF ILLUMINA-E6F4B9:7:59:11224:4989#0/1 U 2665
AF ILLUMINA-E6F4B9:7:59:1442:15281#0/1 U 2665
AF ILLUMINA-E6F4B9:7:61:2315:7399#0/1 U 2665
AF ILLUMINA-E6F4B9:7:62:8118:8451#0/1 U 2665
AF ILLUMINA-E6F4B9:7:65:8663:4932#0/1 U 2665
AF ILLUMINA-E6F4B9:7:71:6424:13043#0/1 U 2665
AF ILLUMINA-E6F4B9:7:73:7668:9606#0/1 U 2665
AF ILLUMINA-E6F4B9:7:73:18979:14807#0/1 U 2665
AF ILLUMINA-E6F4B9:7:77:10425:7881#0/1 U 2665
AF ILLUMINA-E6F4B9:7:85:1280:13671#0/1 U 2665
AF ILLUMINA-E6F4B9:7:86:2004:13105#0/1 U 2665
AF ILLUMINA-E6F4B9:7:88:5754:3097#0/1 U 2665
AF ILLUMINA-E6F4B9:7:89:12247:4389#0/1 U 2665
AF ILLUMINA-E6F4B9:7:97:7077:10131#0/1 U 2665
AF ILLUMINA-E6F4B9:7:100:14879:4272#0/1 U 2665
AF ILLUMINA-E6F4B9:7:101:6712:15671#0/1 U 2665
AF ILLUMINA-E6F4B9:7:102:13481:2699#0/1 U 2665
AF ILLUMINA-E6F4B9:7:104:6392:6504#0/1 U 2665
AF ILLUMINA-E6F4B9:7:104:16474:7439#0/1 U 2665
AF ILLUMINA-E6F4B9:7:107:4621:6759#0/1 U 2665
AF ILLUMINA-E6F4B9:7:113:3410:16578#0/1 U 2665
AF ILLUMINA-E6F4B9:7:114:5979:17434#0/1 U 2665
AF ILLUMINA-E6F4B9:7:116:9675:5495#0/1 U 2665
AF ILLUMINA-E6F4B9:7:117:6471:11423#0/1 U 2665
AF ILLUMINA-E6F4B9:7:120:10091:10796#0/1 U 2665
AF ILLUMINA-E6F4B9:7:120:5557:12370#0/1 U 2665
AF ILLUMINA-E6F4B9:7:3:6941:2060#0/1 U 2666
AF ILLUMINA-E6F4B9:7:3:6290:4581#0/1 U 2666
AF ILLUMINA-E6F4B9:7:9:12634:14582#0/1 U 2666
AF ILLUMINA-E6F4B9:7:12:8592:7792#0/1 U 2666
AF ILLUMINA-E6F4B9:7:14:13637:15733#0/1 U 2666
AF ILLUMINA-E6F4B9:7:15:5037:13887#0/1 U 2666
AF ILLUMINA-E6F4B9:7:16:13746:19325#0/1 U 2666
AF ILLUMINA-E6F4B9:7:17:8019:7727#0/1 U 2666
AF ILLUMINA-E6F4B9:7:22:18089:13488#0/1 U 2666
AF ILLUMINA-E6F4B9:7:25:14360:8816#0/1 U 2666
AF ILLUMINA-E6F4B9:7:43:7527:7061#0/1 U 2666
AF ILLUMINA-E6F4B9:7:43:3209:13149#0/1 U 2666
AF ILLUMINA-E6F4B9:7:44:6840:7214#0/1 U 2666
AF ILLUMINA-E6F4B9:7:51:6964:9338#0/1 U 2666
AF ILLUMINA-E6F4B9:7:51:16996:13137#0/1 U 2666
AF ILLUMINA-E6F4B9:7:52:15744:10406#0/1 U 2666
AF ILLUMINA-E6F4B9:7:56:13892:14238#0/1 U 2666
AF ILLUMINA-E6F4B9:7:77:12445:5694#0/1 U 2666
AF ILLUMINA-E6F4B9:7:83:4618:20209#0/1 U 2666
AF ILLUMINA-E6F4B9:7:85:8259:18105#0/1 U 2666
AF ILLUMINA-E6F4B9:7:88:10632:2850#0/1 U 2666
AF ILLUMINA-E6F4B9:7:92:12872:20861#0/1 U 2666
AF ILLUMINA-E6F4B9:7:99:12902:1131#0/1 U 2666
AF ILLUMINA-E6F4B9:7:99:2631:13964#0/1 U 2666
AF ILLUMINA-E6F4B9:7:101:9710:12711#0/1 U 2666
AF ILLUMINA-E6F4B9:7:104:8875:2491#0/1 U 2666
AF ILLUMINA-E6F4B9:7:106:1215:17479#0/1 U 2666
AF ILLUMINA-E6F4B9:7:111:6778:8379#0/1 U 2666
AF ILLUMINA-E6F4B9:7:10:4878:8331#0/1 U 2667
AF ILLUMINA-E6F4B9:7:11:9939:2264#0/1 U 2667
AF ILLUMINA-E6F4B9:7:15:5963:5552#0/1 U 2667
AF ILLUMINA-E6F4B9:7:23:4477:7312#0/1 U 2667
AF ILLUMINA-E6F4B9:7:23:10042:18066#0/1 U 2667
AF ILLUMINA-E6F4B9:7:29:18825:12451#0/1 U 2667
AF ILLUMINA-E6F4B9:7:32:17053:2659#0/1 U 2667
AF ILLUMINA-E6F4B9:7:35:16085:20079#0/1 U 2667
AF ILLUMINA-E6F4B9:7:51:9553:20656#0/1 U 2667
AF ILLUMINA-E6F4B9:7:59:1775:11791#0/1 U 2667
AF ILLUMINA-E6F4B9:7:85:15578:19196#0/1 U 2667
AF ILLUMINA-E6F4B9:7:90:13789:9214#0/1 U 2667
AF ILLUMINA-E6F4B9:7:90:8004:10533#0/1 U 2667
AF ILLUMINA-E6F4B9:7:92:3465:17262#0/1 U 2667
AF ILLUMINA-E6F4B9:7:97:11580:19314#0/1 U 2667
AF ILLUMINA-E6F4B9:7:97:12645:20457#0/1 U 2667
AF ILLUMINA-E6F4B9:7:120:11942:17152#0/1 U 2669
AF ILLUMINA-E6F4B9:7:4:12075:2450#0/1 U 2673
AF ILLUMINA-E6F4B9:7:6:5695:12011#0/1 U 2673
AF ILLUMINA-E6F4B9:7:16:3775:13990#0/1 U 2673
AF ILLUMINA-E6F4B9:7:28:11211:11431#0/1 U 2673
AF ILLUMINA-E6F4B9:7:94:18529:18000#0/1 U 2673
AF ILLUMINA-E6F4B9:7:118:8580:5953#0/1 U 2673
AF ILLUMINA-E6F4B9:7:34:11630:6228#0/1 U 2674
AF ILLUMINA-E6F4B9:7:40:10465:4686#0/1 U 2674
AF ILLUMINA-E6F4B9:7:89:1956:5978#0/1 U 2674
AF ILLUMINA-E6F4B9:7:36:6639:12338#0/1 U 2675
AF ILLUMINA-E6F4B9:7:65:9969:2002#0/1 U 2675
AF ILLUMINA-E6F4B9:7:115:15732:7848#0/1 U 2675
AF ILLUMINA-E6F4B9:7:26:6641:4646#0/1 U 2677
AF ILLUMINA-E6F4B9:7:33:3590:10753#0/1 U 2677
AF ILLUMINA-E6F4B9:7:36:16232:17683#0/1 C 2677
AF ILLUMINA-E6F4B9:7:66:8256:9928#0/1 C 2677
AF ILLUMINA-E6F4B9:7:34:1998:6881#0/1 C 2678
AF ILLUMINA-E6F4B9:7:110:7888:5271#0/1 U 2685
AF ILLUMINA-E6F4B9:7:22:13617:2382#0/1 C 2686
AF ILLUMINA-E6F4B9:7:89:13618:6638#0/1 U 2686
AF ILLUMINA-E6F4B9:7:95:7857:2964#0/1 U 2686
AF ILLUMINA-E6F4B9:7:56:13881:16056#0/1 U 2687
AF ILLUMINA-E6F4B9:7:55:4874:19524#0/1 U 2687
AF ILLUMINA-E6F4B9:7:81:4411:16965#0/1 U 2690
AF ILLUMINA-E6F4B9:7:11:12413:15358#0/1 U 2712
AF ILLUMINA-E6F4B9:7:37:8075:17211#0/1 U 2717
AF ILLUMINA-E6F4B9:7:117:4744:15868#0/1 U 2726
AF ILLUMINA-E6F4B9:7:93:3993:15925#0/1 U 2728
AF ILLUMINA-E6F4B9:7:118:3732:5145#0/1 U 2728
AF ILLUMINA-E6F4B9:7:34:19380:6018#0/1 U 2729
AF ILLUMINA-E6F4B9:7:113:13612:17620#0/1 U 2729
AF ILLUMINA-E6F4B9:7:104:3186:15500#0/1 U 2731
AF ILLUMINA-E6F4B9:7:8:19533:18581#0/1 U 2732
AF ILLUMINA-E6F4B9:7:24:7585:20368#0/1 U 2732
AF ILLUMINA-E6F4B9:7:25:16454:7905#0/1 U 2732
AF ILLUMINA-E6F4B9:7:38:9938:18172#0/1 U 2732
AF ILLUMINA-E6F4B9:7:80:16496:14494#0/1 U 2732
AF ILLUMINA-E6F4B9:7:91:3775:18827#0/1 U 2732
AF ILLUMINA-E6F4B9:7:96:19079:14990#0/1 U 2732
AF ILLUMINA-E6F4B9:7:111:19742:16773#0/1 U 2732
AF ILLUMINA-E6F4B9:7:117:16161:4653#0/1 U 2732
AF ILLUMINA-E6F4B9:7:118:1952:9111#0/1 U 2732
AF ILLUMINA-E6F4B9:7:47:13250:9616#0/1 U 2734
AF ILLUMINA-E6F4B9:7:49:13915:6029#0/1 U 2733
AF ILLUMINA-E6F4B9:7:54:19757:6054#0/1 U 2736
AF ILLUMINA-E6F4B9:7:63:8058:5493#0/1 U 2736
AF ILLUMINA-E6F4B9:7:110:5261:18472#0/1 U 2736
AF ILLUMINA-E6F4B9:7:97:2352:3787#0/1 U 2744
AF ILLUMINA-E6F4B9:7:116:1765:8402#0/1 U 2744
AF ILLUMINA-E6F4B9:7:120:19390:2718#0/1 U 2744
AF ILLUMINA-E6F4B9:7:79:6696:21192#0/1 U 2746
AF ILLUMINA-E6F4B9:7:91:11154:18283#0/1 U 2752
AF ILLUMINA-E6F4B9:7:28:8928:6931#0/1 U 2754
AF ILLUMINA-E6F4B9:7:64:13239:3221#0/1 U 2754
AF ILLUMINA-E6F4B9:7:95:4383:4436#0/1 U 2754
AF ILLUMINA-E6F4B9:7:114:14375:3792#0/1 U 2754
AF ILLUMINA-E6F4B9:7:20:8701:16254#0/1 U 2755
AF ILLUMINA-E6F4B9:7:46:3953:6660#0/1 U 2755
AF ILLUMINA-E6F4B9:7:50:12470:1125#0/1 U 2755
AF ILLUMINA-E6F4B9:7:54:19634:14746#0/1 U 2755
AF ILLUMINA-E6F4B9:7:58:6820:5268#0/1 U 2755
AF ILLUMINA-E6F4B9:7:26:10951:6983#0/1 U 2756
AF ILLUMINA-E6F4B9:7:48:18810:20764#0/1 U 2756
AF ILLUMINA-E6F4B9:7:50:13686:15420#0/1 U 2756
AF ILLUMINA-E6F4B9:7:2:4366:14681#0/1 U 2757
AF ILLUMINA-E6F4B9:7:12:13906:5295#0/1 U 2757
AF ILLUMINA-E6F4B9:7:17:4864:15536#0/1 U 2757
AF ILLUMINA-E6F4B9:7:3:11562:5632#0/1 U 2758
AF ILLUMINA-E6F4B9:7:16:3719:10541#0/1 U 2758
AF ILLUMINA-E6F4B9:7:71:13458:17413#0/1 U 2758
AF ILLUMINA-E6F4B9:7:43:15704:19616#0/1 U 2759
AF ILLUMINA-E6F4B9:7:91:9589:10780#0/1 U 2759
AF ILLUMINA-E6F4B9:7:92:8393:12558#0/1 U 2759
AF ILLUMINA-E6F4B9:7:26:3382:20289#0/1 U 2760
AF ILLUMINA-E6F4B9:7:118:11262:18076#0/1 U 2760
AF ILLUMINA-E6F4B9:7:119:13530:8871#0/1 U 2760
AF ILLUMINA-E6F4B9:7:83:3292:998#0/1 U 2759
AF ILLUMINA-E6F4B9:7:20:6009:11574#0/1 U 2760
AF ILLUMINA-E6F4B9:7:3:14400:1885#0/1 U 2761
AF ILLUMINA-E6F4B9:7:16:1376:1474#0/1 U 2761
AF ILLUMINA-E6F4B9:7:104:11778:1461#0/1 U 2761
AF ILLUMINA-E6F4B9:7:3:17472:6676#0/1 U 2762
AF ILLUMINA-E6F4B9:7:8:12573:21292#0/1 U 2762
AF ILLUMINA-E6F4B9:7:110:13455:17927#0/1 U 2762
AF ILLUMINA-E6F4B9:7:76:16397:18922#0/1 U 2763
AF ILLUMINA-E6F4B9:7:98:8779:11285#0/1 U 2764
AF ILLUMINA-E6F4B9:7:117:10222:19911#0/1 U 2765
AF ILLUMINA-E6F4B9:7:31:18981:13177#0/1 U 2766
AF ILLUMINA-E6F4B9:7:87:4113:17653#0/1 U 2768
AF ILLUMINA-E6F4B9:7:117:13853:18173#0/1 U 2769
AF ILLUMINA-E6F4B9:7:119:3151:5105#0/1 U 2775
AF ILLUMINA-E6F4B9:7:27:12378:16659#0/1 U 2776
AF ILLUMINA-E6F4B9:7:30:10832:14208#0/1 U 2776
AF ILLUMINA-E6F4B9:7:32:5200:18425#0/1 U 2776
AF ILLUMINA-E6F4B9:7:34:1045:4042#0/1 U 2776
AF ILLUMINA-E6F4B9:7:38:2088:11019#0/1 U 2776
AF ILLUMINA-E6F4B9:7:44:6714:17443#0/1 U 2776
AF ILLUMINA-E6F4B9:7:50:9207:12201#0/1 U 2776
AF ILLUMINA-E6F4B9:7:53:16101:1289#0/1 U 2776
AF ILLUMINA-E6F4B9:7:54:4123:5298#0/1 U 2776
AF ILLUMINA-E6F4B9:7:55:14540:19593#0/1 U 2776
AF ILLUMINA-E6F4B9:7:56:6877:4969#0/1 U 2776
AF ILLUMINA-E6F4B9:7:60:3910:3038#0/1 U 2776
AF ILLUMINA-E6F4B9:7:93:16313:15056#0/1 U 2776
AF ILLUMINA-E6F4B9:7:112:17881:3811#0/1 U 2776
AF ILLUMINA-E6F4B9:7:38:7386:20731#0/1 U 2776
AF ILLUMINA-E6F4B9:7:3:10839:6599#0/1 U 2777
AF ILLUMINA-E6F4B9:7:12:15172:16184#0/1 U 2777
AF ILLUMINA-E6F4B9:7:23:5797:8822#0/1 U 2777
AF ILLUMINA-E6F4B9:7:30:6332:11112#0/1 U 2777
AF ILLUMINA-E6F4B9:7:30:16586:17621#0/1 U 2777
AF ILLUMINA-E6F4B9:7:42:15524:4389#0/1 U 2777
AF ILLUMINA-E6F4B9:7:44:14028:19151#0/1 U 2777
AF ILLUMINA-E6F4B9:7:45:4390:8358#0/1 U 2777
AF ILLUMINA-E6F4B9:7:47:17169:16929#0/1 U 2777
AF ILLUMINA-E6F4B9:7:48:4092:5152#0/1 U 2777
AF ILLUMINA-E6F4B9:7:56:1086:4803#0/1 U 2777
AF ILLUMINA-E6F4B9:7:62:19295:4337#0/1 U 2777
AF ILLUMINA-E6F4B9:7:62:11349:20742#0/1 U 2777
AF ILLUMINA-E6F4B9:7:66:17822:6509#0/1 U 2777
AF ILLUMINA-E6F4B9:7:77:10643:16731#0/1 U 2777
AF ILLUMINA-E6F4B9:7:80:4172:4812#0/1 U 2777
AF ILLUMINA-E6F4B9:7:81:5858:7839#0/1 U 2777
AF ILLUMINA-E6F4B9:7:91:16115:16063#0/1 U 2777
AF ILLUMINA-E6F4B9:7:94:11337:9241#0/1 U 2777
AF ILLUMINA-E6F4B9:7:96:6122:15665#0/1 U 2777
AF ILLUMINA-E6F4B9:7:100:3194:15128#0/1 U 2777
AF ILLUMINA-E6F4B9:7:110:14932:8554#0/1 U 2777
AF ILLUMINA-E6F4B9:7:11:8043:18240#0/1 U 2778
AF ILLUMINA-E6F4B9:7:30:15272:10416#0/1 U 2778
AF ILLUMINA-E6F4B9:7:33:1572:20936#0/1 U 2778
AF ILLUMINA-E6F4B9:7:41:1853:14623#0/1 U 2778
AF ILLUMINA-E6F4B9:7:55:9785:1470#0/1 U 2778
AF ILLUMINA-E6F4B9:7:57:13281:3419#0/1 U 2778
AF ILLUMINA-E6F4B9:7:61:15505:21141#0/1 U 2778
AF ILLUMINA-E6F4B9:7:67:14955:4573#0/1 U 2778
AF ILLUMINA-E6F4B9:7:88:3786:8415#0/1 U 2778
AF ILLUMINA-E6F4B9:7:92:9914:5492#0/1 U 2778
AF ILLUMINA-E6F4B9:7:100:12532:8455#0/1 U 2778
AF ILLUMINA-E6F4B9:7:105:3942:14612#0/1 U 2778
AF ILLUMINA-E6F4B9:7:110:14239:15319#0/1 U 2778
AF ILLUMINA-E6F4B9:7:111:10888:5220#0/1 U 2778
AF ILLUMINA-E6F4B9:7:111:12170:12592#0/1 U 2778
AF ILLUMINA-E6F4B9:7:117:2973:10731#0/1 U 2778
AF ILLUMINA-E6F4B9:7:4:4109:12768#0/1 U 2779
AF ILLUMINA-E6F4B9:7:22:3219:4438#0/1 U 2779
AF ILLUMINA-E6F4B9:7:48:14551:7210#0/1 U 2779
AF ILLUMINA-E6F4B9:7:70:9447:14392#0/1 U 2779
AF ILLUMINA-E6F4B9:7:118:7080:5876#0/1 U 2779
AF ILLUMINA-E6F4B9:7:28:15959:18860#0/1 U 2780
AF ILLUMINA-E6F4B9:7:45:5388:10760#0/1 U 2780
AF ILLUMINA-E6F4B9:7:56:13947:18060#0/1 U 2780
AF ILLUMINA-E6F4B9:7:65:12621:16067#0/1 U 2780
AF ILLUMINA-E6F4B9:7:105:9157:13666#0/1 U 2780
AF ILLUMINA-E6F4B9:7:108:5521:10858#0/1 U 2780
AF ILLUMINA-E6F4B9:7:113:13589:6337#0/1 U 2780
AF ILLUMINA-E6F4B9:7:115:8720:21261#0/1 U 2780
AF ILLUMINA-E6F4B9:7:46:14124:20530#0/1 U 2781
AF ILLUMINA-E6F4B9:7:73:8043:20696#0/1 U 2781
AF ILLUMINA-E6F4B9:7:74:5013:20910#0/1 U 2781
AF ILLUMINA-E6F4B9:7:88:14479:6677#0/1 U 2781
AF ILLUMINA-E6F4B9:7:86:15041:2129#0/1 U 2781
AF ILLUMINA-E6F4B9:7:16:6016:2113#0/1 U 2782
AF ILLUMINA-E6F4B9:7:29:2834:3665#0/1 U 2782
AF ILLUMINA-E6F4B9:7:33:18936:21267#0/1 U 2782
AF ILLUMINA-E6F4B9:7:62:2964:1428#0/1 U 2782
AF ILLUMINA-E6F4B9:7:17:10127:20513#0/1 U 2783
AF ILLUMINA-E6F4B9:7:6:5764:9782#0/1 U 2784
AF ILLUMINA-E6F4B9:7:62:2205:16238#0/1 U 2784
AF ILLUMINA-E6F4B9:7:80:1886:7789#0/1 C 2784
AF ILLUMINA-E6F4B9:7:82:6963:8722#0/1 U 2784
AF ILLUMINA-E6F4B9:7:107:14188:5377#0/1 U 2784
AF ILLUMINA-E6F4B9:7:17:10873:15794#0/1 U 2797
AF ILLUMINA-E6F4B9:7:15:16280:8422#0/1 U 2810
AF ILLUMINA-E6F4B9:7:120:5170:5904#0/1 C 2811
AF ILLUMINA-E6F4B9:7:36:5629:18237#0/1 U 2813
AF ILLUMINA-E6F4B9:7:16:4913:18372#0/1 U 2814
AF ILLUMINA-E6F4B9:7:70:1054:3829#0/1 U 2814
AF ILLUMINA-E6F4B9:7:82:8114:9127#0/1 U 2815
AF ILLUMINA-E6F4B9:7:6:5597:15280#0/1 U 2817
AF ILLUMINA-E6F4B9:7:52:19290:14463#0/1 U 2819
AF ILLUMINA-E6F4B9:7:42:2742:2373#0/1 U 2820
AF ILLUMINA-E6F4B9:7:106:3644:15649#0/1 U 2820
AF ILLUMINA-E6F4B9:7:79:3050:10519#0/1 U 2821
AF ILLUMINA-E6F4B9:7:32:10792:6544#0/1 U 2823
AF ILLUMINA-E6F4B9:7:43:8661:1580#0/1 U 2823
AF ILLUMINA-E6F4B9:7:53:11589:17473#0/1 U 2823
AF ILLUMINA-E6F4B9:7:8:12008:18426#0/1 U 2824
AF ILLUMINA-E6F4B9:7:31:5392:4812#0/1 U 2824
AF ILLUMINA-E6F4B9:7:108:14064:12936#0/1 U 2824
AF ILLUMINA-E6F4B9:7:74:13550:15535#0/1 U 2825
AF ILLUMINA-E6F4B9:7:96:12871:2586#0/1 U 2839
AF ILLUMINA-E6F4B9:7:92:3764:6487#0/1 U 2842
AF ILLUMINA-E6F4B9:7:89:16524:16846#0/1 U 2843
AF ILLUMINA-E6F4B9:7:93:17529:6589#0/1 U 2843
AF ILLUMINA-E6F4B9:7:31:12527:20687#0/1 U 2841
AF ILLUMINA-E6F4B9:7:23:18610:9116#0/1 U 2844
AF ILLUMINA-E6F4B9:7:4:3284:7249#0/1 U 2845
AF ILLUMINA-E6F4B9:7:9:4325:2109#0/1 U 2845
AF ILLUMINA-E6F4B9:7:15:16607:14085#0/1 U 2845
AF ILLUMINA-E6F4B9:7:21:5323:3498#0/1 U 2845
AF ILLUMINA-E6F4B9:7:22:5194:18084#0/1 U 2845
AF ILLUMINA-E6F4B9:7:23:9488:4228#0/1 U 2845
AF ILLUMINA-E6F4B9:7:41:15939:7841#0/1 U 2845
AF ILLUMINA-E6F4B9:7:50:2371:3063#0/1 U 2845
AF ILLUMINA-E6F4B9:7:109:7560:12751#0/1 U 2845
AF ILLUMINA-E6F4B9:7:119:3711:1732#0/1 U 2845
AF ILLUMINA-E6F4B9:7:114:7363:10469#0/1 U 2844
AF ILLUMINA-E6F4B9:7:23:15281:1988#0/1 U 2845
AF ILLUMINA-E6F4B9:7:6:14123:16170#0/1 U 2846
AF ILLUMINA-E6F4B9:7:8:18918:9078#0/1 U 2846
AF ILLUMINA-E6F4B9:7:11:14681:3529#0/1 U 2846
AF ILLUMINA-E6F4B9:7:13:1847:17488#0/1 U 2846
AF ILLUMINA-E6F4B9:7:15:7100:19196#0/1 U 2846
AF ILLUMINA-E6F4B9:7:22:18843:19898#0/1 U 2846
AF ILLUMINA-E6F4B9:7:23:6656:17648#0/1 U 2846
AF ILLUMINA-E6F4B9:7:30:17684:13647#0/1 U 2846
AF ILLUMINA-E6F4B9:7:30:17752:14240#0/1 U 2846
AF ILLUMINA-E6F4B9:7:32:15850:19771#0/1 U 2846
AF ILLUMINA-E6F4B9:7:62:6632:4272#0/1 U 2846
AF ILLUMINA-E6F4B9:7:69:16702:12685#0/1 U 2846
AF ILLUMINA-E6F4B9:7:74:1492:7536#0/1 U 2846
AF ILLUMINA-E6F4B9:7:83:2835:4941#0/1 U 2846
AF ILLUMINA-E6F4B9:7:92:13103:4626#0/1 U 2846
AF ILLUMINA-E6F4B9:7:98:16866:15479#0/1 U 2846
AF ILLUMINA-E6F4B9:7:102:5527:6647#0/1 U 2846
AF ILLUMINA-E6F4B9:7:104:16096:17159#0/1 U 2846
AF ILLUMINA-E6F4B9:7:109:7644:5393#0/1 U 2846
AF ILLUMINA-E6F4B9:7:112:7581:17543#0/1 U 2846
AF ILLUMINA-E6F4B9:7:118:11073:17773#0/1 U 2846
AF ILLUMINA-E6F4B9:7:1:15741:18533#0/1 U 2845
AF ILLUMINA-E6F4B9:7:6:3541:8159#0/1 U 2847
AF ILLUMINA-E6F4B9:7:6:10345:13914#0/1 U 2847
AF ILLUMINA-E6F4B9:7:8:12242:20313#0/1 U 2847
AF ILLUMINA-E6F4B9:7:14:18197:2418#0/1 U 2847
AF ILLUMINA-E6F4B9:7:14:7996:12310#0/1 U 2847
AF ILLUMINA-E6F4B9:7:16:15680:3051#0/1 U 2847
AF ILLUMINA-E6F4B9:7:21:18383:16833#0/1 U 2847
AF ILLUMINA-E6F4B9:7:23:3479:12469#0/1 U 2847
AF ILLUMINA-E6F4B9:7:28:4125:17056#0/1 U 2847
AF ILLUMINA-E6F4B9:7:30:1575:5306#0/1 U 2847
AF ILLUMINA-E6F4B9:7:31:15740:14782#0/1 U 2847
AF ILLUMINA-E6F4B9:7:31:6078:19105#0/1 U 2847
AF ILLUMINA-E6F4B9:7:36:11319:3316#0/1 U 2847
AF ILLUMINA-E6F4B9:7:37:13655:2327#0/1 U 2847
AF ILLUMINA-E6F4B9:7:38:4923:6629#0/1 U 2847
AF ILLUMINA-E6F4B9:7:38:13467:12330#0/1 U 2847
AF ILLUMINA-E6F4B9:7:38:9660:21101#0/1 U 2847
AF ILLUMINA-E6F4B9:7:41:7475:5151#0/1 U 2847
AF ILLUMINA-E6F4B9:7:41:10798:10279#0/1 U 2847
AF ILLUMINA-E6F4B9:7:42:1812:13823#0/1 U 2847
AF ILLUMINA-E6F4B9:7:42:3601:17284#0/1 U 2847
AF ILLUMINA-E6F4B9:7:43:10318:6919#0/1 U 2847
AF ILLUMINA-E6F4B9:7:43:7396:14957#0/1 U 2847
AF ILLUMINA-E6F4B9:7:47:2537:13383#0/1 U 2847
AF ILLUMINA-E6F4B9:7:48:8084:15295#0/1 U 2847
AF ILLUMINA-E6F4B9:7:51:7445:16656#0/1 U 2847
AF ILLUMINA-E6F4B9:7:60:2484:19527#0/1 U 2847
AF ILLUMINA-E6F4B9:7:62:16284:14662#0/1 U 2847
AF ILLUMINA-E6F4B9:7:63:14383:8607#0/1 U 2847
AF ILLUMINA-E6F4B9:7:66:14039:5366#0/1 U 2847
AF ILLUMINA-E6F4B9:7:72:11221:20001#0/1 U 2847
AF ILLUMINA-E6F4B9:7:77:13246:12412#0/1 U 2847
AF ILLUMINA-E6F4B9:7:77:8185:15415#0/1 U 2847
AF ILLUMINA-E6F4B9:7:78:16248:2407#0/1 U 2847
AF ILLUMINA-E6F4B9:7:80:17201:13906#0/1 U 2847
AF ILLUMINA-E6F4B9:7:83:3225:12579#0/1 U 2847
AF ILLUMINA-E6F4B9:7:85:5423:3485#0/1 U 2847
AF ILLUMINA-E6F4B9:7:85:6310:5689#0/1 U 2847
AF ILLUMINA-E6F4B9:7:86:17709:6796#0/1 U 2847
AF ILLUMINA-E6F4B9:7:86:9226:18382#0/1 U 2847
AF ILLUMINA-E6F4B9:7:87:2523:1970#0/1 U 2847
AF ILLUMINA-E6F4B9:7:90:17519:16102#0/1 U 2847
AF ILLUMINA-E6F4B9:7:91:14182:19102#0/1 U 2847
AF ILLUMINA-E6F4B9:7:94:4602:12191#0/1 U 2847
AF ILLUMINA-E6F4B9:7:94:8368:17309#0/1 U 2847
AF ILLUMINA-E6F4B9:7:95:18735:6960#0/1 U 2847
AF ILLUMINA-E6F4B9:7:97:11450:1489#0/1 U 2847
AF ILLUMINA-E6F4B9:7:106:13167:5990#0/1 U 2847
AF ILLUMINA-E6F4B9:7:108:5697:2559#0/1 U 2847
AF ILLUMINA-E6F4B9:7:108:11111:9012#0/1 U 2847
AF ILLUMINA-E6F4B9:7:111:19454:11109#0/1 U 2847
AF ILLUMINA-E6F4B9:7:111:4430:13190#0/1 U 2847
AF ILLUMINA-E6F4B9:7:112:11222:1058#0/1 U 2847
AF ILLUMINA-E6F4B9:7:112:15363:16624#0/1 U 2847
AF ILLUMINA-E6F4B9:7:113:13126:1593#0/1 U 2847
AF ILLUMINA-E6F4B9:7:113:16026:4078#0/1 U 2847
AF ILLUMINA-E6F4B9:7:114:4046:2696#0/1 U 2847
AF ILLUMINA-E6F4B9:7:117:8879:2240#0/1 U 2847
AF ILLUMINA-E6F4B9:7:2:1398:15433#0/1 U 2848
AF ILLUMINA-E6F4B9:7:4:13043:2105#0/1 U 2848
AF ILLUMINA-E6F4B9:7:4:6711:12018#0/1 U 2848
AF ILLUMINA-E6F4B9:7:4:8624:15939#0/1 U 2848
AF ILLUMINA-E6F4B9:7:5:2714:9087#0/1 U 2848
AF ILLUMINA-E6F4B9:7:6:8368:5443#0/1 U 2848
AF ILLUMINA-E6F4B9:7:6:1169:14404#0/1 U 2848
AF ILLUMINA-E6F4B9:7:7:12893:1283#0/1 U 2848
AF ILLUMINA-E6F4B9:7:10:1278:3519#0/1 U 2848
AF ILLUMINA-E6F4B9:7:10:17799:10703#0/1 U 2848
AF ILLUMINA-E6F4B9:7:10:16123:11835#0/1 U 2848
AF ILLUMINA-E6F4B9:7:12:3359:16024#0/1 U 2848
AF ILLUMINA-E6F4B9:7:12:11765:18607#0/1 U 2848
AF ILLUMINA-E6F4B9:7:13:13853:10583#0/1 U 2848
AF ILLUMINA-E6F4B9:7:16:17544:9530#0/1 U 2848
AF ILLUMINA-E6F4B9:7:16:10567:13365#0/1 U 2848
AF ILLUMINA-E6F4B9:7:17:14818:7162#0/1 U 2848
AF ILLUMINA-E6F4B9:7:17:3314:9057#0/1 U 2848
AF ILLUMINA-E6F4B9:7:22:17201:5378#0/1 U 2848
AF ILLUMINA-E6F4B9:7:22:10789:5495#0/1 U 2848
AF ILLUMINA-E6F4B9:7:22:15368:12972#0/1 U 2848
AF ILLUMINA-E6F4B9:7:22:5880:17993#0/1 U 2848
AF ILLUMINA-E6F4B9:7:24:18921:19009#0/1 U 2848
AF ILLUMINA-E6F4B9:7:26:18648:4332#0/1 U 2848
AF ILLUMINA-E6F4B9:7:28:11008:5330#0/1 U 2848
AF ILLUMINA-E6F4B9:7:28:8588:5586#0/1 U 2848
AF ILLUMINA-E6F4B9:7:29:15742:4832#0/1 U 2848
AF ILLUMINA-E6F4B9:7:30:17494:2595#0/1 U 2848
AF ILLUMINA-E6F4B9:7:31:12908:2658#0/1 U 2848
AF ILLUMINA-E6F4B9:7:31:13555:3014#0/1 U 2848
AF ILLUMINA-E6F4B9:7:33:10641:7424#0/1 U 2848
AF ILLUMINA-E6F4B9:7:35:4620:20339#0/1 U 2848
AF ILLUMINA-E6F4B9:7:36:7725:11571#0/1 U 2848
AF ILLUMINA-E6F4B9:7:37:3269:8254#0/1 U 2848
AF ILLUMINA-E6F4B9:7:37:3308:15459#0/1 U 2848
AF ILLUMINA-E6F4B9:7:37:5005:18044#0/1 U 2848
AF ILLUMINA-E6F4B9:7:39:9640:3907#0/1 U 2848
AF ILLUMINA-E6F4B9:7:40:15933:4378#0/1 U 2848
AF ILLUMINA-E6F4B9:7:42:17878:10772#0/1 U 2848
AF ILLUMINA-E6F4B9:7:42:6383:19373#0/1 U 2848
AF ILLUMINA-E6F4B9:7:45:2956:6554#0/1 U 2848
AF ILLUMINA-E6F4B9:7:45:4805:18811#0/1 U 2848
AF ILLUMINA-E6F4B9:7:46:11722:11779#0/1 U 2848
AF ILLUMINA-E6F4B9:7:46:9691:20879#0/1 U 2848
AF ILLUMINA-E6F4B9:7:47:14229:7377#0/1 U 2848
AF ILLUMINA-E6F4B9:7:47:6035:21137#0/1 U 2848
AF ILLUMINA-E6F4B9:7:48:6830:7616#0/1 U 2848
AF ILLUMINA-E6F4B9:7:50:18761:17217#0/1 U 2848
AF ILLUMINA-E6F4B9:7:52:2719:2928#0/1 U 2848
AF ILLUMINA-E6F4B9:7:52:14506:9027#0/1 U 2848
AF ILLUMINA-E6F4B9:7:53:6999:11448#0/1 U 2848
AF ILLUMINA-E6F4B9:7:56:9888:2613#0/1 U 2848
AF ILLUMINA-E6F4B9:7:58:13540:1741#0/1 U 2848
AF ILLUMINA-E6F4B9:7:59:3101:6435#0/1 U 2848
AF ILLUMINA-E6F4B9:7:59:13081:13676#0/1 U 2848
AF ILLUMINA-E6F4B9:7:59:16701:18078#0/1 U 2848
AF ILLUMINA-E6F4B9:7:61:1673:12910#0/1 U 2848
AF ILLUMINA-E6F4B9:7:63:13019:16856#0/1 U 2848
AF ILLUMINA-E6F4B9:7:63:14402:21045#0/1 U 2848
AF ILLUMINA-E6F4B9:7:64:18567:3406#0/1 U 2848
AF ILLUMINA-E6F4B9:7:65:13216:15500#0/1 U 2848
AF ILLUMINA-E6F4B9:7:66:17366:6206#0/1 U 2848
AF ILLUMINA-E6F4B9:7:66:8660:9365#0/1 U 2848
AF ILLUMINA-E6F4B9:7:66:5587:13166#0/1 U 2848
AF ILLUMINA-E6F4B9:7:66:14963:13880#0/1 U 2848
AF ILLUMINA-E6F4B9:7:70:12241:3242#0/1 U 2848
AF ILLUMINA-E6F4B9:7:71:18451:14119#0/1 U 2848
AF ILLUMINA-E6F4B9:7:71:19119:19870#0/1 U 2848
AF ILLUMINA-E6F4B9:7:71:4700:20971#0/1 U 2848
AF ILLUMINA-E6F4B9:7:72:8382:1693#0/1 U 2848
AF ILLUMINA-E6F4B9:7:74:16207:9016#0/1 U 2848
AF ILLUMINA-E6F4B9:7:74:4775:10204#0/1 U 2848
AF ILLUMINA-E6F4B9:7:81:7914:10418#0/1 U 2848
AF ILLUMINA-E6F4B9:7:81:2468:19199#0/1 U 2848
AF ILLUMINA-E6F4B9:7:83:18139:2064#0/1 U 2848
AF ILLUMINA-E6F4B9:7:83:16266:5010#0/1 U 2848
AF ILLUMINA-E6F4B9:7:90:9981:2437#0/1 U 2848
AF ILLUMINA-E6F4B9:7:91:9834:12185#0/1 U 2848
AF ILLUMINA-E6F4B9:7:92:3308:17499#0/1 U 2848
AF ILLUMINA-E6F4B9:7:93:15643:10117#0/1 U 2848
AF ILLUMINA-E6F4B9:7:94:7492:11539#0/1 U 2848
AF ILLUMINA-E6F4B9:7:97:8190:15105#0/1 U 2848
AF ILLUMINA-E6F4B9:7:98:10271:2739#0/1 U 2848
AF ILLUMINA-E6F4B9:7:99:15171:4134#0/1 U 2848
AF ILLUMINA-E6F4B9:7:99:16420:7610#0/1 U 2848
AF ILLUMINA-E6F4B9:7:100:12169:12028#0/1 U 2848
AF ILLUMINA-E6F4B9:7:100:1423:17859#0/1 U 2848
AF ILLUMINA-E6F4B9:7:101:8710:13136#0/1 U 2848
AF ILLUMINA-E6F4B9:7:102:3339:1654#0/1 U 2848
AF ILLUMINA-E6F4B9:7:102:9471:11575#0/1 U 2848
AF ILLUMINA-E6F4B9:7:105:18685:4367#0/1 U 2848
AF ILLUMINA-E6F4B9:7:105:7538:5508#0/1 U 2848
AF ILLUMINA-E6F4B9:7:106:16651:20126#0/1 U 2848
AF ILLUMINA-E6F4B9:7:106:14535:20413#0/1 U 2848
AF ILLUMINA-E6F4B9:7:107:19182:10797#0/1 U 2848
AF ILLUMINA-E6F4B9:7:107:1034:12499#0/1 U 2848
AF ILLUMINA-E6F4B9:7:109:16726:9498#0/1 U 2848
AF ILLUMINA-E6F4B9:7:111:13016:8968#0/1 U 2848
AF ILLUMINA-E6F4B9:7:111:10853:18208#0/1 U 2848
AF ILLUMINA-E6F4B9:7:112:10214:13287#0/1 U 2848
AF ILLUMINA-E6F4B9:7:112:7985:17245#0/1 U 2848
AF ILLUMINA-E6F4B9:7:114:3811:16038#0/1 U 2848
AF ILLUMINA-E6F4B9:7:115:13805:3939#0/1 U 2848
AF ILLUMINA-E6F4B9:7:116:1982:9165#0/1 U 2848
AF ILLUMINA-E6F4B9:7:117:7946:6878#0/1 U 2848
AF ILLUMINA-E6F4B9:7:117:6887:18251#0/1 U 2848
AF ILLUMINA-E6F4B9:7:119:5730:18883#0/1 U 2848
AF ILLUMINA-E6F4B9:7:120:3170:6089#0/1 U 2848
AF ILLUMINA-E6F4B9:7:120:6805:16121#0/1 U 2848
AF ILLUMINA-E6F4B9:7:19:13696:8729#0/1 U 2848
AF ILLUMINA-E6F4B9:7:80:16008:18526#0/1 U 2848
AF ILLUMINA-E6F4B9:7:90:1469:10429#0/1 U 2848
AF ILLUMINA-E6F4B9:7:1:16856:1280#0/1 U 2849
AF ILLUMINA-E6F4B9:7:1:18710:16225#0/1 U 2849
AF ILLUMINA-E6F4B9:7:2:3841:17422#0/1 U 2849
AF ILLUMINA-E6F4B9:7:5:6814:9713#0/1 U 2849
AF ILLUMINA-E6F4B9:7:8:10646:20854#0/1 U 2849
AF ILLUMINA-E6F4B9:7:14:11643:11076#0/1 U 2849
AF ILLUMINA-E6F4B9:7:14:16284:18660#0/1 U 2849
AF ILLUMINA-E6F4B9:7:22:14192:15446#0/1 U 2849
AF ILLUMINA-E6F4B9:7:28:7153:2071#0/1 U 2849
AF ILLUMINA-E6F4B9:7:28:14625:8287#0/1 U 2849
AF ILLUMINA-E6F4B9:7:30:5977:4083#0/1 U 2849
AF ILLUMINA-E6F4B9:7:33:4061:16967#0/1 U 2849
AF ILLUMINA-E6F4B9:7:33:8091:19160#0/1 U 2849
AF ILLUMINA-E6F4B9:7:34:6939:2840#0/1 U 2849
AF ILLUMINA-E6F4B9:7:35:1965:1647#0/1 U 2849
AF ILLUMINA-E6F4B9:7:35:3467:6870#0/1 U 2849
AF ILLUMINA-E6F4B9:7:39:6667:11804#0/1 U 2849
AF ILLUMINA-E6F4B9:7:41:16990:8905#0/1 U 2849
AF ILLUMINA-E6F4B9:7:42:8272:12868#0/1 U 2849
AF ILLUMINA-E6F4B9:7:42:13420:13141#0/1 U 2849
AF ILLUMINA-E6F4B9:7:43:17592:18295#0/1 U 2849
AF ILLUMINA-E6F4B9:7:44:14698:1442#0/1 U 2849
AF ILLUMINA-E6F4B9:7:44:1487:6127#0/1 U 2849
AF ILLUMINA-E6F4B9:7:49:11589:18367#0/1 U 2849
AF ILLUMINA-E6F4B9:7:50:11342:14205#0/1 U 2849
AF ILLUMINA-E6F4B9:7:51:10579:3488#0/1 U 2849
AF ILLUMINA-E6F4B9:7:51:14121:14003#0/1 U 2849
AF ILLUMINA-E6F4B9:7:57:7062:4454#0/1 U 2849
AF ILLUMINA-E6F4B9:7:58:4510:4455#0/1 U 2849
AF ILLUMINA-E6F4B9:7:58:8975:11703#0/1 U 2849
AF ILLUMINA-E6F4B9:7:63:3623:1926#0/1 U 2849
AF ILLUMINA-E6F4B9:7:65:10086:21127#0/1 U 2849
AF ILLUMINA-E6F4B9:7:66:10443:18655#0/1 U 2849
AF ILLUMINA-E6F4B9:7:68:4532:15140#0/1 U 2849
AF ILLUMINA-E6F4B9:7:73:16623:13606#0/1 U 2849
AF ILLUMINA-E6F4B9:7:78:13487:11204#0/1 U 2849
AF ILLUMINA-E6F4B9:7:80:8781:21027#0/1 U 2849
AF ILLUMINA-E6F4B9:7:81:9298:21037#0/1 U 2849
AF ILLUMINA-E6F4B9:7:82:10479:19127#0/1 U 2849
AF ILLUMINA-E6F4B9:7:86:15573:19035#0/1 U 2849
AF ILLUMINA-E6F4B9:7:93:5677:14777#0/1 U 2849
AF ILLUMINA-E6F4B9:7:95:11288:6974#0/1 U 2849
AF ILLUMINA-E6F4B9:7:98:8383:1084#0/1 U 2849
AF ILLUMINA-E6F4B9:7:98:9128:2600#0/1 U 2849
AF ILLUMINA-E6F4B9:7:98:8147:19945#0/1 U 2849
AF ILLUMINA-E6F4B9:7:99:3579:12955#0/1 U 2849
AF ILLUMINA-E6F4B9:7:99:5463:16852#0/1 U 2849
AF ILLUMINA-E6F4B9:7:101:4931:7292#0/1 U 2849
AF ILLUMINA-E6F4B9:7:101:3533:18860#0/1 U 2849
AF ILLUMINA-E6F4B9:7:104:6028:19449#0/1 U 2849
AF ILLUMINA-E6F4B9:7:105:1180:2819#0/1 U 2849
AF ILLUMINA-E6F4B9:7:107:13403:19469#0/1 U 2849
AF ILLUMINA-E6F4B9:7:111:7838:3916#0/1 U 2849
AF ILLUMINA-E6F4B9:7:112:10358:19465#0/1 U 2849
AF ILLUMINA-E6F4B9:7:115:11727:17686#0/1 U 2849
AF ILLUMINA-E6F4B9:7:117:3458:7173#0/1 U 2849
AF ILLUMINA-E6F4B9:7:118:14768:9605#0/1 U 2849
AF ILLUMINA-E6F4B9:7:119:6979:11103#0/1 U 2849
AF ILLUMINA-E6F4B9:7:1:10255:14287#0/1 U 2850
AF ILLUMINA-E6F4B9:7:1:9039:16711#0/1 U 2850
AF ILLUMINA-E6F4B9:7:1:15388:18612#0/1 U 2850
AF ILLUMINA-E6F4B9:7:5:14186:1984#0/1 U 2850
AF ILLUMINA-E6F4B9:7:5:12822:2843#0/1 U 2850
AF ILLUMINA-E6F4B9:7:5:17600:15810#0/1 U 2850
AF ILLUMINA-E6F4B9:7:5:13193:18159#0/1 U 2850
AF ILLUMINA-E6F4B9:7:6:12411:8604#0/1 U 2850
AF ILLUMINA-E6F4B9:7:7:15622:3559#0/1 U 2850
AF ILLUMINA-E6F4B9:7:7:17039:20261#0/1 U 2850
AF ILLUMINA-E6F4B9:7:8:12428:17218#0/1 U 2850
AF ILLUMINA-E6F4B9:7:9:4650:10414#0/1 U 2850
AF ILLUMINA-E6F4B9:7:9:1820:14499#0/1 U 2850
AF ILLUMINA-E6F4B9:7:10:5690:9312#0/1 U 2850
AF ILLUMINA-E6F4B9:7:11:7726:11346#0/1 U 2850
AF ILLUMINA-E6F4B9:7:12:8371:2462#0/1 U 2850
AF ILLUMINA-E6F4B9:7:15:2175:16397#0/1 U 2850
AF ILLUMINA-E6F4B9:7:16:15229:1955#0/1 U 2850
AF ILLUMINA-E6F4B9:7:16:16039:4993#0/1 U 2850
AF ILLUMINA-E6F4B9:7:16:9676:13609#0/1 U 2850
AF ILLUMINA-E6F4B9:7:18:4375:7794#0/1 U 2850
AF ILLUMINA-E6F4B9:7:20:2978:9861#0/1 U 2850
AF ILLUMINA-E6F4B9:7:23:6679:8245#0/1 U 2850
AF ILLUMINA-E6F4B9:7:24:1812:8466#0/1 U 2850
AF ILLUMINA-E6F4B9:7:24:12528:10630#0/1 U 2850
AF ILLUMINA-E6F4B9:7:26:3564:12389#0/1 U 2850
AF ILLUMINA-E6F4B9:7:26:1989:13341#0/1 U 2850
AF ILLUMINA-E6F4B9:7:27:10630:3948#0/1 U 2850
AF ILLUMINA-E6F4B9:7:28:13640:8297#0/1 U 2850
AF ILLUMINA-E6F4B9:7:29:17235:10126#0/1 U 2850
AF ILLUMINA-E6F4B9:7:30:17080:8924#0/1 U 2850
AF ILLUMINA-E6F4B9:7:30:18485:11836#0/1 U 2850
AF ILLUMINA-E6F4B9:7:30:13591:13947#0/1 U 2850
AF ILLUMINA-E6F4B9:7:30:14156:20766#0/1 U 2850
AF ILLUMINA-E6F4B9:7:31:18942:12337#0/1 U 2850
AF ILLUMINA-E6F4B9:7:32:18632:13820#0/1 U 2850
AF ILLUMINA-E6F4B9:7:32:5970:14899#0/1 U 2850
AF ILLUMINA-E6F4B9:7:32:11560:20191#0/1 U 2850
AF ILLUMINA-E6F4B9:7:33:7498:2941#0/1 U 2850
AF ILLUMINA-E6F4B9:7:35:7429:16909#0/1 U 2850
AF ILLUMINA-E6F4B9:7:37:9937:10336#0/1 U 2850
AF ILLUMINA-E6F4B9:7:38:2290:8629#0/1 U 2850
AF ILLUMINA-E6F4B9:7:39:9648:12503#0/1 U 2850
AF ILLUMINA-E6F4B9:7:40:8484:17522#0/1 U 2850
AF ILLUMINA-E6F4B9:7:40:8041:20052#0/1 U 2850
AF ILLUMINA-E6F4B9:7:41:4213:9258#0/1 U 2850
AF ILLUMINA-E6F4B9:7:42:14995:1100#0/1 U 2850
AF ILLUMINA-E6F4B9:7:43:11797:3862#0/1 U 2850
AF ILLUMINA-E6F4B9:7:43:12435:16725#0/1 U 2850
AF ILLUMINA-E6F4B9:7:44:17802:12657#0/1 U 2850
AF ILLUMINA-E6F4B9:7:44:5363:13562#0/1 U 2850
AF ILLUMINA-E6F4B9:7:45:11883:6750#0/1 U 2850
AF ILLUMINA-E6F4B9:7:46:18130:11408#0/1 U 2850
AF ILLUMINA-E6F4B9:7:46:6942:15974#0/1 U 2850
AF ILLUMINA-E6F4B9:7:48:19221:5714#0/1 U 2850
AF ILLUMINA-E6F4B9:7:49:17680:15485#0/1 U 2850
AF ILLUMINA-E6F4B9:7:49:11655:17253#0/1 U 2850
AF ILLUMINA-E6F4B9:7:50:13253:13670#0/1 U 2850
AF ILLUMINA-E6F4B9:7:50:15520:14126#0/1 U 2850
AF ILLUMINA-E6F4B9:7:51:16775:20424#0/1 U 2850
AF ILLUMINA-E6F4B9:7:53:8069:5999#0/1 U 2850
AF ILLUMINA-E6F4B9:7:54:19041:17041#0/1 U 2850
AF ILLUMINA-E6F4B9:7:56:2146:5539#0/1 U 2850
AF ILLUMINA-E6F4B9:7:58:13143:2571#0/1 U 2850
AF ILLUMINA-E6F4B9:7:59:2969:3284#0/1 U 2850
AF ILLUMINA-E6F4B9:7:60:5760:16039#0/1 U 2850
AF ILLUMINA-E6F4B9:7:61:18366:16351#0/1 U 2850
AF ILLUMINA-E6F4B9:7:61:9154:18959#0/1 U 2850
AF ILLUMINA-E6F4B9:7:62:16112:2418#0/1 U 2850
AF ILLUMINA-E6F4B9:7:62:4702:20346#0/1 U 2850
AF ILLUMINA-E6F4B9:7:64:2102:1850#0/1 U 2850
AF ILLUMINA-E6F4B9:7:66:6019:20594#0/1 U 2850
AF ILLUMINA-E6F4B9:7:69:7990:11192#0/1 U 2850
AF ILLUMINA-E6F4B9:7:72:6154:10297#0/1 U 2850
AF ILLUMINA-E6F4B9:7:74:1451:2966#0/1 U 2850
AF ILLUMINA-E6F4B9:7:74:10271:4142#0/1 U 2850
AF ILLUMINA-E6F4B9:7:75:3735:3138#0/1 U 2850
AF ILLUMINA-E6F4B9:7:77:8631:7742#0/1 U 2850
AF ILLUMINA-E6F4B9:7:79:2202:13472#0/1 U 2850
AF ILLUMINA-E6F4B9:7:80:17443:9026#0/1 U 2850
AF ILLUMINA-E6F4B9:7:80:2683:14808#0/1 U 2850
AF ILLUMINA-E6F4B9:7:81:14849:2933#0/1 U 2850
AF ILLUMINA-E6F4B9:7:81:17290:10152#0/1 U 2850
AF ILLUMINA-E6F4B9:7:82:15524:13557#0/1 U 2850
AF ILLUMINA-E6F4B9:7:83:15329:9082#0/1 U 2850
AF ILLUMINA-E6F4B9:7:83:10865:16672#0/1 U 2850
AF ILLUMINA-E6F4B9:7:86:1332:4610#0/1 U 2850
AF ILLUMINA-E6F4B9:7:87:5607:1731#0/1 U 2850
AF ILLUMINA-E6F4B9:7:88:10603:8563#0/1 U 2850
AF ILLUMINA-E6F4B9:7:88:18012:9441#0/1 U 2850
AF ILLUMINA-E6F4B9:7:89:14063:5263#0/1 U 2850
AF ILLUMINA-E6F4B9:7:89:15548:10075#0/1 U 2850
AF ILLUMINA-E6F4B9:7:89:17709:15848#0/1 U 2850
AF ILLUMINA-E6F4B9:7:90:9625:9542#0/1 U 2850
AF ILLUMINA-E6F4B9:7:90:14747:11653#0/1 U 2850
AF ILLUMINA-E6F4B9:7:90:15159:12599#0/1 U 2850
AF ILLUMINA-E6F4B9:7:90:10018:12643#0/1 U 2850
AF ILLUMINA-E6F4B9:7:91:14738:13916#0/1 U 2850
AF ILLUMINA-E6F4B9:7:91:8707:19320#0/1 U 2850
AF ILLUMINA-E6F4B9:7:94:15812:5374#0/1 U 2850
AF ILLUMINA-E6F4B9:7:95:14250:19287#0/1 U 2850
AF ILLUMINA-E6F4B9:7:96:2643:4113#0/1 U 2850
AF ILLUMINA-E6F4B9:7:96:4399:15441#0/1 U 2850
AF ILLUMINA-E6F4B9:7:97:6101:3054#0/1 U 2850
AF ILLUMINA-E6F4B9:7:97:13036:19081#0/1 U 2850
AF ILLUMINA-E6F4B9:7:98:13942:3693#0/1 U 2850
AF ILLUMINA-E6F4B9:7:98:1071:9053#0/1 U 2850
AF ILLUMINA-E6F4B9:7:101:17451:15151#0/1 U 2850
AF ILLUMINA-E6F4B9:7:101:13616:21004#0/1 U 2850
AF ILLUMINA-E6F4B9:7:102:19307:2780#0/1 U 2850
AF ILLUMINA-E6F4B9:7:102:16268:10384#0/1 U 2850
AF ILLUMINA-E6F4B9:7:104:15959:14626#0/1 U 2850
AF ILLUMINA-E6F4B9:7:104:1354:19304#0/1 U 2850
AF ILLUMINA-E6F4B9:7:104:2165:20524#0/1 U 2850
AF ILLUMINA-E6F4B9:7:105:2294:2038#0/1 U 2850
AF ILLUMINA-E6F4B9:7:108:11509:20915#0/1 U 2850
AF ILLUMINA-E6F4B9:7:110:17254:2850#0/1 U 2850
AF ILLUMINA-E6F4B9:7:110:7943:5949#0/1 U 2850
AF ILLUMINA-E6F4B9:7:110:11161:18574#0/1 U 2850
AF ILLUMINA-E6F4B9:7:111:11520:15069#0/1 U 2850
AF ILLUMINA-E6F4B9:7:116:17341:3958#0/1 U 2850
AF ILLUMINA-E6F4B9:7:116:5046:5838#0/1 U 2850
AF ILLUMINA-E6F4B9:7:116:6451:16984#0/1 U 2850
AF ILLUMINA-E6F4B9:7:117:18848:15306#0/1 U 2850
AF ILLUMINA-E6F4B9:7:117:7740:17708#0/1 U 2850
AF ILLUMINA-E6F4B9:7:118:5185:3110#0/1 U 2850
AF ILLUMINA-E6F4B9:7:118:8751:17696#0/1 U 2850
AF ILLUMINA-E6F4B9:7:119:15410:10243#0/1 U 2850
AF ILLUMINA-E6F4B9:7:120:8644:8851#0/1 U 2850
AF ILLUMINA-E6F4B9:7:120:16477:12380#0/1 U 2850
AF ILLUMINA-E6F4B9:7:79:14444:1160#0/1 U 2848
AF ILLUMINA-E6F4B9:7:87:2781:13960#0/1 U 2848
AF ILLUMINA-E6F4B9:7:1:18868:4024#0/1 U 2851
AF ILLUMINA-E6F4B9:7:1:18921:12931#0/1 U 2851
AF ILLUMINA-E6F4B9:7:2:1941:4363#0/1 U 2851
AF ILLUMINA-E6F4B9:7:5:18300:6286#0/1 U 2851
AF ILLUMINA-E6F4B9:7:7:14153:1817#0/1 U 2851
AF ILLUMINA-E6F4B9:7:8:8310:1542#0/1 U 2851
AF ILLUMINA-E6F4B9:7:8:3249:5479#0/1 U 2851
AF ILLUMINA-E6F4B9:7:8:7693:8930#0/1 U 2851
AF ILLUMINA-E6F4B9:7:8:3899:8953#0/1 U 2851
AF ILLUMINA-E6F4B9:7:9:1796:8147#0/1 U 2851
AF ILLUMINA-E6F4B9:7:11:14642:12692#0/1 U 2851
AF ILLUMINA-E6F4B9:7:11:9147:15050#0/1 U 2851
AF ILLUMINA-E6F4B9:7:12:10988:2850#0/1 U 2851
AF ILLUMINA-E6F4B9:7:15:19560:9051#0/1 U 2851
AF ILLUMINA-E6F4B9:7:15:2647:11700#0/1 U 2851
AF ILLUMINA-E6F4B9:7:16:10833:1287#0/1 U 2851
AF ILLUMINA-E6F4B9:7:16:10199:8332#0/1 U 2851
AF ILLUMINA-E6F4B9:7:19:3618:12102#0/1 U 2851
AF ILLUMINA-E6F4B9:7:23:5167:6400#0/1 U 2851
AF ILLUMINA-E6F4B9:7:25:8481:2202#0/1 U 2851
AF ILLUMINA-E6F4B9:7:25:7778:10583#0/1 U 2851
AF ILLUMINA-E6F4B9:7:25:6548:18184#0/1 U 2851
AF ILLUMINA-E6F4B9:7:26:15688:4004#0/1 U 2851
AF ILLUMINA-E6F4B9:7:27:7857:16734#0/1 U 2851
AF ILLUMINA-E6F4B9:7:31:14768:2300#0/1 U 2851
AF ILLUMINA-E6F4B9:7:34:17809:19136#0/1 U 2851
AF ILLUMINA-E6F4B9:7:35:1609:17788#0/1 U 2851
AF ILLUMINA-E6F4B9:7:35:19142:19437#0/1 U 2851
AF ILLUMINA-E6F4B9:7:36:12189:7777#0/1 U 2851
AF ILLUMINA-E6F4B9:7:36:19481:10605#0/1 U 2851
AF ILLUMINA-E6F4B9:7:37:16697:7074#0/1 U 2851
AF ILLUMINA-E6F4B9:7:37:16540:7917#0/1 U 2851
AF ILLUMINA-E6F4B9:7:38:17559:11538#0/1 U 2851
AF ILLUMINA-E6F4B9:7:38:12984:18463#0/1 U 2851
AF ILLUMINA-E6F4B9:7:39:7441:10332#0/1 U 2851
AF ILLUMINA-E6F4B9:7:39:10469:19979#0/1 U 2851
AF ILLUMINA-E6F4B9:7:42:4924:15157#0/1 U 2851
AF ILLUMINA-E6F4B9:7:43:6333:18126#0/1 U 2851
AF ILLUMINA-E6F4B9:7:45:9153:19577#0/1 U 2851
AF ILLUMINA-E6F4B9:7:46:9980:8658#0/1 U 2851
AF ILLUMINA-E6F4B9:7:47:12708:12530#0/1 U 2851
AF ILLUMINA-E6F4B9:7:48:4040:17157#0/1 U 2851
AF ILLUMINA-E6F4B9:7:49:18358:3042#0/1 U 2851
AF ILLUMINA-E6F4B9:7:49:12766:19953#0/1 U 2851
AF ILLUMINA-E6F4B9:7:50:4029:16074#0/1 U 2851
AF ILLUMINA-E6F4B9:7:51:18391:12547#0/1 U 2851
AF ILLUMINA-E6F4B9:7:52:2586:13735#0/1 U 2851
AF ILLUMINA-E6F4B9:7:52:12477:16494#0/1 U 2851
AF ILLUMINA-E6F4B9:7:52:4666:18248#0/1 U 2851
AF ILLUMINA-E6F4B9:7:53:11024:1128#0/1 U 2851
AF ILLUMINA-E6F4B9:7:57:15482:14770#0/1 U 2851
AF ILLUMINA-E6F4B9:7:58:8412:3508#0/1 U 2851
AF ILLUMINA-E6F4B9:7:58:10399:5472#0/1 U 2851
AF ILLUMINA-E6F4B9:7:58:3976:5863#0/1 U 2851
AF ILLUMINA-E6F4B9:7:59:13459:5518#0/1 U 2851
AF ILLUMINA-E6F4B9:7:61:7555:17789#0/1 U 2851
AF ILLUMINA-E6F4B9:7:63:12411:18872#0/1 U 2851
AF ILLUMINA-E6F4B9:7:64:13638:5711#0/1 U 2851
AF ILLUMINA-E6F4B9:7:71:14001:17246#0/1 U 2851
AF ILLUMINA-E6F4B9:7:73:4598:5480#0/1 U 2851
AF ILLUMINA-E6F4B9:7:73:4268:6349#0/1 U 2851
AF ILLUMINA-E6F4B9:7:73:10760:20739#0/1 U 2851
AF ILLUMINA-E6F4B9:7:74:10035:11706#0/1 U 2851
AF ILLUMINA-E6F4B9:7:77:12651:14453#0/1 U 2851
AF ILLUMINA-E6F4B9:7:78:16227:5369#0/1 U 2851
AF ILLUMINA-E6F4B9:7:79:13767:1269#0/1 U 2851
AF ILLUMINA-E6F4B9:7:81:1096:13404#0/1 U 2851
AF ILLUMINA-E6F4B9:7:82:14696:8158#0/1 U 2851
AF ILLUMINA-E6F4B9:7:82:18692:10380#0/1 U 2851
AF ILLUMINA-E6F4B9:7:83:19394:3594#0/1 U 2851
AF ILLUMINA-E6F4B9:7:84:16591:3309#0/1 U 2851
AF ILLUMINA-E6F4B9:7:86:5438:3221#0/1 U 2851
AF ILLUMINA-E6F4B9:7:86:5044:9662#0/1 U 2851
AF ILLUMINA-E6F4B9:7:86:9555:17941#0/1 U 2851
AF ILLUMINA-E6F4B9:7:89:14042:1746#0/1 U 2851
AF ILLUMINA-E6F4B9:7:90:16690:18924#0/1 U 2851
AF ILLUMINA-E6F4B9:7:94:10928:15164#0/1 U 2851
AF ILLUMINA-E6F4B9:7:96:5314:13704#0/1 U 2851
AF ILLUMINA-E6F4B9:7:97:4373:3318#0/1 U 2851
AF ILLUMINA-E6F4B9:7:98:5156:16449#0/1 U 2851
AF ILLUMINA-E6F4B9:7:99:5161:19731#0/1 U 2851
AF ILLUMINA-E6F4B9:7:100:7601:6065#0/1 U 2851
AF ILLUMINA-E6F4B9:7:101:15985:15979#0/1 U 2851
AF ILLUMINA-E6F4B9:7:102:5430:7745#0/1 U 2851
AF ILLUMINA-E6F4B9:7:103:5174:20643#0/1 U 2851
AF ILLUMINA-E6F4B9:7:104:9297:15305#0/1 U 2851
AF ILLUMINA-E6F4B9:7:104:3596:19684#0/1 U 2851
AF ILLUMINA-E6F4B9:7:105:9851:12383#0/1 U 2851
AF ILLUMINA-E6F4B9:7:105:3002:15178#0/1 U 2851
AF ILLUMINA-E6F4B9:7:106:4767:11230#0/1 U 2851
AF ILLUMINA-E6F4B9:7:107:15348:21316#0/1 U 2851
AF ILLUMINA-E6F4B9:7:108:17418:12147#0/1 U 2851
AF ILLUMINA-E6F4B9:7:109:6325:15941#0/1 U 2851
AF ILLUMINA-E6F4B9:7:111:16300:2820#0/1 U 2851
AF ILLUMINA-E6F4B9:7:111:18922:10326#0/1 U 2851
AF ILLUMINA-E6F4B9:7:111:16275:16261#0/1 U 2851
AF ILLUMINA-E6F4B9:7:111:9974:20139#0/1 U 2851
AF ILLUMINA-E6F4B9:7:112:7823:1477#0/1 U 2851
AF ILLUMINA-E6F4B9:7:113:12680:1154#0/1 U 2851
AF ILLUMINA-E6F4B9:7:113:15065:11691#0/1 U 2851
AF ILLUMINA-E6F4B9:7:115:7034:5392#0/1 U 2851
AF ILLUMINA-E6F4B9:7:115:2831:16755#0/1 U 2851
AF ILLUMINA-E6F4B9:7:115:8325:19163#0/1 U 2851
AF ILLUMINA-E6F4B9:7:116:9260:1520#0/1 U 2851
AF ILLUMINA-E6F4B9:7:117:2567:21076#0/1 U 2851
AF ILLUMINA-E6F4B9:7:118:8611:5626#0/1 U 2851
AF ILLUMINA-E6F4B9:7:119:10368:10554#0/1 U 2851
AF ILLUMINA-E6F4B9:7:119:15217:14503#0/1 U 2851
AF ILLUMINA-E6F4B9:7:120:14811:6130#0/1 U 2851
AF ILLUMINA-E6F4B9:7:120:12743:15078#0/1 U 2851
AF ILLUMINA-E6F4B9:7:120:17769:21171#0/1 U 2851
AF ILLUMINA-E6F4B9:7:4:18919:12675#0/1 U 2850
AF ILLUMINA-E6F4B9:7:16:19231:12887#0/1 U 2851
AF ILLUMINA-E6F4B9:7:46:7516:20613#0/1 U 2851
AF ILLUMINA-E6F4B9:7:9:9699:6820#0/1 U 2852
AF ILLUMINA-E6F4B9:7:9:2332:16922#0/1 U 2852
AF ILLUMINA-E6F4B9:7:10:3223:9284#0/1 U 2852
AF ILLUMINA-E6F4B9:7:14:15976:21001#0/1 U 2852
AF ILLUMINA-E6F4B9:7:16:17613:1845#0/1 U 2852
AF ILLUMINA-E6F4B9:7:20:13549:3252#0/1 U 2852
AF ILLUMINA-E6F4B9:7:22:8180:18500#0/1 U 2852
AF ILLUMINA-E6F4B9:7:24:18323:10442#0/1 U 2852
AF ILLUMINA-E6F4B9:7:25:8109:18276#0/1 U 2852
AF ILLUMINA-E6F4B9:7:26:4673:7499#0/1 U 2852
AF ILLUMINA-E6F4B9:7:36:14536:7369#0/1 U 2852
AF ILLUMINA-E6F4B9:7:39:1694:13561#0/1 U 2852
AF ILLUMINA-E6F4B9:7:42:16043:8555#0/1 U 2852
AF ILLUMINA-E6F4B9:7:42:4737:17266#0/1 U 2852
AF ILLUMINA-E6F4B9:7:44:2342:1715#0/1 U 2852
AF ILLUMINA-E6F4B9:7:45:16239:3856#0/1 U 2852
AF ILLUMINA-E6F4B9:7:45:15589:8419#0/1 U 2852
AF ILLUMINA-E6F4B9:7:48:4702:13765#0/1 U 2852
AF ILLUMINA-E6F4B9:7:51:4990:20098#0/1 U 2852
AF ILLUMINA-E6F4B9:7:52:14353:20187#0/1 U 2852
AF ILLUMINA-E6F4B9:7:53:4129:12745#0/1 U 2852
AF ILLUMINA-E6F4B9:7:58:14974:19345#0/1 U 2852
AF ILLUMINA-E6F4B9:7:61:12793:12338#0/1 U 2852
AF ILLUMINA-E6F4B9:7:64:7160:7560#0/1 U 2852
AF ILLUMINA-E6F4B9:7:65:11233:1676#0/1 U 2852
AF ILLUMINA-E6F4B9:7:66:6833:16785#0/1 U 2852
AF ILLUMINA-E6F4B9:7:67:9582:2239#0/1 U 2852
AF ILLUMINA-E6F4B9:7:67:19639:10982#0/1 U 2852
AF ILLUMINA-E6F4B9:7:71:11967:6534#0/1 U 2852
AF ILLUMINA-E6F4B9:7:72:13244:10267#0/1 U 2852
AF ILLUMINA-E6F4B9:7:75:8472:5740#0/1 U 2852
AF ILLUMINA-E6F4B9:7:76:11267:15062#0/1 U 2852
AF ILLUMINA-E6F4B9:7:77:12053:7195#0/1 U 2852
AF ILLUMINA-E6F4B9:7:77:2269:14568#0/1 U 2852
AF ILLUMINA-E6F4B9:7:78:12572:20243#0/1 U 2852
AF ILLUMINA-E6F4B9:7:80:14847:6121#0/1 U 2852
AF ILLUMINA-E6F4B9:7:82:5419:13689#0/1 U 2852
AF ILLUMINA-E6F4B9:7:86:8194:5228#0/1 U 2852
AF ILLUMINA-E6F4B9:7:87:10688:8374#0/1 U 2852
AF ILLUMINA-E6F4B9:7:92:2510:9712#0/1 U 2852
AF ILLUMINA-E6F4B9:7:92:7511:20498#0/1 U 2852
AF ILLUMINA-E6F4B9:7:94:10408:16047#0/1 U 2852
AF ILLUMINA-E6F4B9:7:95:16870:3537#0/1 U 2852
AF ILLUMINA-E6F4B9:7:95:6816:18197#0/1 U 2852
AF ILLUMINA-E6F4B9:7:96:12774:3462#0/1 U 2852
AF ILLUMINA-E6F4B9:7:96:15143:6135#0/1 U 2852
AF ILLUMINA-E6F4B9:7:96:3714:15158#0/1 U 2852
AF ILLUMINA-E6F4B9:7:97:6221:5560#0/1 U 2852
AF ILLUMINA-E6F4B9:7:97:4347:6436#0/1 U 2852
AF ILLUMINA-E6F4B9:7:97:12698:13098#0/1 U 2852
AF ILLUMINA-E6F4B9:7:100:7171:19091#0/1 U 2852
AF ILLUMINA-E6F4B9:7:101:19546:15760#0/1 U 2852
AF ILLUMINA-E6F4B9:7:102:19789:4339#0/1 U 2852
AF ILLUMINA-E6F4B9:7:104:16010:9841#0/1 U 2852
AF ILLUMINA-E6F4B9:7:104:14331:14079#0/1 U 2852
AF ILLUMINA-E6F4B9:7:108:12765:7929#0/1 U 2852
AF ILLUMINA-E6F4B9:7:110:14803:20327#0/1 U 2852
AF ILLUMINA-E6F4B9:7:111:16822:6773#0/1 U 2852
AF ILLUMINA-E6F4B9:7:114:14103:9275#0/1 U 2852
AF ILLUMINA-E6F4B9:7:116:13932:10876#0/1 U 2852
AF ILLUMINA-E6F4B9:7:116:8407:12057#0/1 U 2852
AF ILLUMINA-E6F4B9:7:118:5741:8106#0/1 U 2852
AF ILLUMINA-E6F4B9:7:17:7701:11075#0/1 U 2852
AF ILLUMINA-E6F4B9:7:9:11754:15519#0/1 U 2853
AF ILLUMINA-E6F4B9:7:14:16417:6544#0/1 U 2853
AF ILLUMINA-E6F4B9:7:20:14641:1475#0/1 U 2853
AF ILLUMINA-E6F4B9:7:20:4759:5324#0/1 U 2853
AF ILLUMINA-E6F4B9:7:21:18394:7803#0/1 U 2853
AF ILLUMINA-E6F4B9:7:26:13591:9499#0/1 U 2853
AF ILLUMINA-E6F4B9:7:26:2012:14484#0/1 U 2853
AF ILLUMINA-E6F4B9:7:29:1802:15030#0/1 U 2853
AF ILLUMINA-E6F4B9:7:33:17340:13571#0/1 U 2853
AF ILLUMINA-E6F4B9:7:35:15668:19907#0/1 U 2853
AF ILLUMINA-E6F4B9:7:39:4722:11979#0/1 U 2853
AF ILLUMINA-E6F4B9:7:50:13482:17216#0/1 U 2853
AF ILLUMINA-E6F4B9:7:69:2771:7120#0/1 U 2853
AF ILLUMINA-E6F4B9:7:71:8766:5239#0/1 U 2853
AF ILLUMINA-E6F4B9:7:74:15390:2028#0/1 U 2853
AF ILLUMINA-E6F4B9:7:78:5804:10868#0/1 U 2853
AF ILLUMINA-E6F4B9:7:99:2487:21290#0/1 U 2853
AF ILLUMINA-E6F4B9:7:101:17480:12075#0/1 U 2853
AF ILLUMINA-E6F4B9:7:102:12580:9942#0/1 U 2853
AF ILLUMINA-E6F4B9:7:111:1746:11611#0/1 U 2853
AF ILLUMINA-E6F4B9:7:113:5496:15176#0/1 U 2853
AF ILLUMINA-E6F4B9:7:116:15275:17360#0/1 U 2853
AF ILLUMINA-E6F4B9:7:94:15791:20911#0/1 U 2853
AF ILLUMINA-E6F4B9:7:101:14505:4651#0/1 U 2854
AF ILLUMINA-E6F4B9:7:108:17083:5380#0/1 U 2854
AF ILLUMINA-E6F4B9:7:119:2822:18220#0/1 U 2854
AF ILLUMINA-E6F4B9:7:17:1543:19903#0/1 U 2855
AF ILLUMINA-E6F4B9:7:26:9042:1033#0/1 U 2855
AF ILLUMINA-E6F4B9:7:97:10678:17612#0/1 U 2855
AF ILLUMINA-E6F4B9:7:11:13469:13092#0/1 U 2856
AF ILLUMINA-E6F4B9:7:12:16557:20818#0/1 U 2856
AF ILLUMINA-E6F4B9:7:21:13319:17837#0/1 U 2856
AF ILLUMINA-E6F4B9:7:22:17912:19000#0/1 U 2856
AF ILLUMINA-E6F4B9:7:23:18258:6350#0/1 U 2856
AF ILLUMINA-E6F4B9:7:24:10701:11868#0/1 U 2856
AF ILLUMINA-E6F4B9:7:37:5650:10665#0/1 U 2856
AF ILLUMINA-E6F4B9:7:63:8292:15598#0/1 U 2856
AF ILLUMINA-E6F4B9:7:71:14130:4714#0/1 U 2856
AF ILLUMINA-E6F4B9:7:76:7766:11497#0/1 U 2856
AF ILLUMINA-E6F4B9:7:83:4466:12612#0/1 U 2856
AF ILLUMINA-E6F4B9:7:119:19369:20908#0/1 U 2856
AF ILLUMINA-E6F4B9:7:50:7525:10312#0/1 U 2857
AF ILLUMINA-E6F4B9:7:73:19356:14359#0/1 U 2857
AF ILLUMINA-E6F4B9:7:79:5940:18822#0/1 U 2857
AF ILLUMINA-E6F4B9:7:90:8981:8267#0/1 U 2857
AF ILLUMINA-E6F4B9:7:90:3551:13741#0/1 U 2857
AF ILLUMINA-E6F4B9:7:96:17064:13768#0/1 U 2857
AF ILLUMINA-E6F4B9:7:110:1942:8551#0/1 U 2857
AF ILLUMINA-E6F4B9:7:15:9228:7558#0/1 U 2858
AF ILLUMINA-E6F4B9:7:28:6721:6830#0/1 U 2858
AF ILLUMINA-E6F4B9:7:29:17309:6100#0/1 U 2858
AF ILLUMINA-E6F4B9:7:35:12015:2056#0/1 U 2858
AF ILLUMINA-E6F4B9:7:39:11564:13692#0/1 U 2858
AF ILLUMINA-E6F4B9:7:76:7811:19055#0/1 U 2858
AF ILLUMINA-E6F4B9:7:81:13012:5032#0/1 U 2858
AF ILLUMINA-E6F4B9:7:84:2397:20109#0/1 U 2858
AF ILLUMINA-E6F4B9:7:93:16082:2630#0/1 U 2858
AF ILLUMINA-E6F4B9:7:95:12396:10944#0/1 U 2858
AF ILLUMINA-E6F4B9:7:99:11787:10787#0/1 U 2858
AF ILLUMINA-E6F4B9:7:100:11806:5516#0/1 U 2858
AF ILLUMINA-E6F4B9:7:114:7765:3324#0/1 U 2858
AF ILLUMINA-E6F4B9:7:120:3259:7057#0/1 U 2858
AF ILLUMINA-E6F4B9:7:2:18583:9773#0/1 U 2859
AF ILLUMINA-E6F4B9:7:9:2734:16900#0/1 U 2859
AF ILLUMINA-E6F4B9:7:23:11977:16360#0/1 U 2859
AF ILLUMINA-E6F4B9:7:31:7809:6753#0/1 U 2859
AF ILLUMINA-E6F4B9:7:47:8243:9006#0/1 U 2859
AF ILLUMINA-E6F4B9:7:53:8222:1335#0/1 U 2859
AF ILLUMINA-E6F4B9:7:64:8966:7568#0/1 U 2859
AF ILLUMINA-E6F4B9:7:72:13893:16327#0/1 U 2859
AF ILLUMINA-E6F4B9:7:76:3973:5533#0/1 U 2859
AF ILLUMINA-E6F4B9:7:81:8848:14035#0/1 U 2859
AF ILLUMINA-E6F4B9:7:91:4684:2654#0/1 U 2859
AF ILLUMINA-E6F4B9:7:94:1796:4049#0/1 U 2859
AF ILLUMINA-E6F4B9:7:100:16076:3191#0/1 U 2859
AF ILLUMINA-E6F4B9:7:103:3813:1513#0/1 U 2859
AF ILLUMINA-E6F4B9:7:103:9255:17144#0/1 U 2859
AF ILLUMINA-E6F4B9:7:108:11564:12884#0/1 U 2859
AF ILLUMINA-E6F4B9:7:112:12944:12183#0/1 U 2859
AF ILLUMINA-E6F4B9:7:24:13889:6266#0/1 U 2860
AF ILLUMINA-E6F4B9:7:53:11542:1758#0/1 C 2877
AF ILLUMINA-E6F4B9:7:103:19359:12379#0/1 U 2885
AF ILLUMINA-E6F4B9:7:29:12288:14792#0/1 U 2890
AF ILLUMINA-E6F4B9:7:32:5309:12722#0/1 U 2894
AF ILLUMINA-E6F4B9:7:61:10938:16389#0/1 U 2899
AF ILLUMINA-E6F4B9:7:67:11810:2807#0/1 U 2899
AF ILLUMINA-E6F4B9:7:79:1643:14657#0/1 U 2899
AF ILLUMINA-E6F4B9:7:97:10350:17980#0/1 U 2899
AF ILLUMINA-E6F4B9:7:1:4843:1173#0/1 U 2900
AF ILLUMINA-E6F4B9:7:11:8909:6242#0/1 U 2900
AF ILLUMINA-E6F4B9:7:13:12408:17148#0/1 U 2900
AF ILLUMINA-E6F4B9:7:39:6919:3233#0/1 U 2900
AF ILLUMINA-E6F4B9:7:49:1140:6686#0/1 U 2900
AF ILLUMINA-E6F4B9:7:3:18649:15201#0/1 U 2901
AF ILLUMINA-E6F4B9:7:10:12328:6664#0/1 U 2901
AF ILLUMINA-E6F4B9:7:13:12532:17188#0/1 U 2901
AF ILLUMINA-E6F4B9:7:18:6148:14235#0/1 U 2901
AF ILLUMINA-E6F4B9:7:21:8002:14385#0/1 U 2901
AF ILLUMINA-E6F4B9:7:38:12400:8363#0/1 U 2901
AF ILLUMINA-E6F4B9:7:60:6191:1670#0/1 U 2901
AF ILLUMINA-E6F4B9:7:64:19564:1387#0/1 U 2901
AF ILLUMINA-E6F4B9:7:69:7777:12590#0/1 U 2901
AF ILLUMINA-E6F4B9:7:70:7538:12340#0/1 U 2901
AF ILLUMINA-E6F4B9:7:74:13288:7636#0/1 U 2901
AF ILLUMINA-E6F4B9:7:74:1447:13696#0/1 U 2901
AF ILLUMINA-E6F4B9:7:83:18030:2713#0/1 U 2901
AF ILLUMINA-E6F4B9:7:84:13660:9416#0/1 U 2901
AF ILLUMINA-E6F4B9:7:92:17641:2294#0/1 U 2901
AF ILLUMINA-E6F4B9:7:92:18480:10238#0/1 U 2901
AF ILLUMINA-E6F4B9:7:111:12918:2585#0/1 U 2901
AF ILLUMINA-E6F4B9:7:3:1262:5782#0/1 U 2902
AF ILLUMINA-E6F4B9:7:3:6554:8924#0/1 U 2902
AF ILLUMINA-E6F4B9:7:6:1140:13443#0/1 U 2902
AF ILLUMINA-E6F4B9:7:11:17506:15282#0/1 U 2902
AF ILLUMINA-E6F4B9:7:17:12192:9831#0/1 U 2902
AF ILLUMINA-E6F4B9:7:17:1727:18482#0/1 U 2902
AF ILLUMINA-E6F4B9:7:21:13989:9176#0/1 U 2902
AF ILLUMINA-E6F4B9:7:21:2530:10212#0/1 U 2902
AF ILLUMINA-E6F4B9:7:28:5719:12625#0/1 U 2902
AF ILLUMINA-E6F4B9:7:34:18804:20394#0/1 U 2902
AF ILLUMINA-E6F4B9:7:37:13009:5053#0/1 U 2902
AF ILLUMINA-E6F4B9:7:39:4294:3280#0/1 U 2902
AF ILLUMINA-E6F4B9:7:39:12006:5477#0/1 U 2902
AF ILLUMINA-E6F4B9:7:39:4062:16158#0/1 U 2902
AF ILLUMINA-E6F4B9:7:40:15771:18383#0/1 U 2902
AF ILLUMINA-E6F4B9:7:41:15875:4921#0/1 U 2902
AF ILLUMINA-E6F4B9:7:46:14802:6239#0/1 U 2902
AF ILLUMINA-E6F4B9:7:50:16950:11873#0/1 U 2902
AF ILLUMINA-E6F4B9:7:52:6941:7717#0/1 U 2902
AF ILLUMINA-E6F4B9:7:55:15124:14664#0/1 U 2902
AF ILLUMINA-E6F4B9:7:56:18450:16572#0/1 U 2902
AF ILLUMINA-E6F4B9:7:60:12202:4336#0/1 U 2902
AF ILLUMINA-E6F4B9:7:63:10180:10934#0/1 U 2902
AF ILLUMINA-E6F4B9:7:67:11250:11998#0/1 U 2902
AF ILLUMINA-E6F4B9:7:72:12016:10269#0/1 U 2902
AF ILLUMINA-E6F4B9:7:74:14372:20677#0/1 U 2902
AF ILLUMINA-E6F4B9:7:75:8419:10955#0/1 U 2902
AF ILLUMINA-E6F4B9:7:76:5559:5048#0/1 U 2902
AF ILLUMINA-E6F4B9:7:78:8050:4474#0/1 U 2902
AF ILLUMINA-E6F4B9:7:78:1177:10468#0/1 U 2902
AF ILLUMINA-E6F4B9:7:80:8126:3453#0/1 U 2902
AF ILLUMINA-E6F4B9:7:82:3349:9382#0/1 U 2902
AF ILLUMINA-E6F4B9:7:83:17011:8184#0/1 U 2902
AF ILLUMINA-E6F4B9:7:84:11628:17989#0/1 U 2902
AF ILLUMINA-E6F4B9:7:85:6842:4809#0/1 U 2902
AF ILLUMINA-E6F4B9:7:88:9454:8147#0/1 U 2902
AF ILLUMINA-E6F4B9:7:92:16321:10255#0/1 U 2902
AF ILLUMINA-E6F4B9:7:103:16767:2140#0/1 U 2902
AF ILLUMINA-E6F4B9:7:103:9338:6423#0/1 U 2902
AF ILLUMINA-E6F4B9:7:103:11728:11294#0/1 U 2902
AF ILLUMINA-E6F4B9:7:108:3276:7038#0/1 U 2902
AF ILLUMINA-E6F4B9:7:108:1860:10196#0/1 U 2902
AF ILLUMINA-E6F4B9:7:108:6222:11616#0/1 U 2902
AF ILLUMINA-E6F4B9:7:110:18712:7658#0/1 U 2902
AF ILLUMINA-E6F4B9:7:111:6302:15086#0/1 U 2902
AF ILLUMINA-E6F4B9:7:115:19496:6450#0/1 U 2902
AF ILLUMINA-E6F4B9:7:115:17083:11435#0/1 U 2902
AF ILLUMINA-E6F4B9:7:120:11710:2997#0/1 U 2902
AF ILLUMINA-E6F4B9:7:120:3811:3036#0/1 U 2902
AF ILLUMINA-E6F4B9:7:23:8600:8136#0/1 U 2902
AF ILLUMINA-E6F4B9:7:44:17709:3010#0/1 U 2902
AF ILLUMINA-E6F4B9:7:2:5751:6681#0/1 U 2903
AF ILLUMINA-E6F4B9:7:6:19088:8999#0/1 U 2903
AF ILLUMINA-E6F4B9:7:8:18409:2373#0/1 U 2903
AF ILLUMINA-E6F4B9:7:10:8090:5507#0/1 U 2903
AF ILLUMINA-E6F4B9:7:10:11720:9036#0/1 U 2903
AF ILLUMINA-E6F4B9:7:11:5484:16167#0/1 U 2903
AF ILLUMINA-E6F4B9:7:12:5333:8944#0/1 U 2903
AF ILLUMINA-E6F4B9:7:12:12934:11544#0/1 U 2903
AF ILLUMINA-E6F4B9:7:13:18209:19979#0/1 U 2903
AF ILLUMINA-E6F4B9:7:14:4110:5637#0/1 U 2903
AF ILLUMINA-E6F4B9:7:23:14755:13492#0/1 U 2903
AF ILLUMINA-E6F4B9:7:23:12221:19818#0/1 U 2903
AF ILLUMINA-E6F4B9:7:24:18760:7834#0/1 U 2903
AF ILLUMINA-E6F4B9:7:26:10872:9823#0/1 U 2903
AF ILLUMINA-E6F4B9:7:26:1390:12783#0/1 U 2903
AF ILLUMINA-E6F4B9:7:27:6166:19284#0/1 U 2903
AF ILLUMINA-E6F4B9:7:29:13261:12718#0/1 U 2903
AF ILLUMINA-E6F4B9:7:30:16866:2351#0/1 U 2903
AF ILLUMINA-E6F4B9:7:31:13055:14141#0/1 U 2903
AF ILLUMINA-E6F4B9:7:35:8706:17902#0/1 U 2903
AF ILLUMINA-E6F4B9:7:38:18496:10568#0/1 U 2903
AF ILLUMINA-E6F4B9:7:38:8681:18489#0/1 U 2903
AF ILLUMINA-E6F4B9:7:48:15038:13353#0/1 U 2903
AF ILLUMINA-E6F4B9:7:48:19587:15911#0/1 U 2903
AF ILLUMINA-E6F4B9:7:50:9831:1976#0/1 U 2903
AF ILLUMINA-E6F4B9:7:50:17378:5645#0/1 U 2903
AF ILLUMINA-E6F4B9:7:53:18589:12182#0/1 U 2903
AF ILLUMINA-E6F4B9:7:55:2438:13803#0/1 U 2903
AF ILLUMINA-E6F4B9:7:56:14295:6289#0/1 U 2903
AF ILLUMINA-E6F4B9:7:58:15005:19789#0/1 U 2903
AF ILLUMINA-E6F4B9:7:60:10233:3480#0/1 U 2903
AF ILLUMINA-E6F4B9:7:60:19434:7055#0/1 U 2903
AF ILLUMINA-E6F4B9:7:62:14016:1444#0/1 U 2903
AF ILLUMINA-E6F4B9:7:69:14536:7808#0/1 U 2903
AF ILLUMINA-E6F4B9:7:69:7093:16728#0/1 U 2903
AF ILLUMINA-E6F4B9:7:74:11359:14669#0/1 U 2903
AF ILLUMINA-E6F4B9:7:76:18337:4064#0/1 U 2903
AF ILLUMINA-E6F4B9:7:79:17852:19015#0/1 U 2903
AF ILLUMINA-E6F4B9:7:81:15131:7136#0/1 U 2903
AF ILLUMINA-E6F4B9:7:82:6018:3605#0/1 U 2903
AF ILLUMINA-E6F4B9:7:83:2765:14464#0/1 U 2903
AF ILLUMINA-E6F4B9:7:84:9600:6439#0/1 U 2903
AF ILLUMINA-E6F4B9:7:84:15653:9878#0/1 U 2903
AF ILLUMINA-E6F4B9:7:86:2945:10999#0/1 U 2903
AF ILLUMINA-E6F4B9:7:87:16217:6831#0/1 U 2903
AF ILLUMINA-E6F4B9:7:87:17826:16962#0/1 U 2903
AF ILLUMINA-E6F4B9:7:88:8859:4347#0/1 U 2903
AF ILLUMINA-E6F4B9:7:90:16575:9659#0/1 U 2903
AF ILLUMINA-E6F4B9:7:92:4137:17521#0/1 U 2903
AF ILLUMINA-E6F4B9:7:94:11562:15076#0/1 U 2903
AF ILLUMINA-E6F4B9:7:95:9364:3994#0/1 U 2903
AF ILLUMINA-E6F4B9:7:95:7764:5221#0/1 U 2903
AF ILLUMINA-E6F4B9:7:101:6883:1937#0/1 U 2903
AF ILLUMINA-E6F4B9:7:102:8358:8890#0/1 U 2903
AF ILLUMINA-E6F4B9:7:105:6580:14134#0/1 U 2903
AF ILLUMINA-E6F4B9:7:106:15307:10687#0/1 U 2903
AF ILLUMINA-E6F4B9:7:111:7015:2511#0/1 U 2903
AF ILLUMINA-E6F4B9:7:111:6003:16378#0/1 U 2903
AF ILLUMINA-E6F4B9:7:113:7596:17565#0/1 U 2903
AF ILLUMINA-E6F4B9:7:120:1328:9157#0/1 U 2903
AF ILLUMINA-E6F4B9:7:2:17679:17888#0/1 U 2904
AF ILLUMINA-E6F4B9:7:7:13199:16465#0/1 U 2904
AF ILLUMINA-E6F4B9:7:9:12853:1118#0/1 U 2904
AF ILLUMINA-E6F4B9:7:11:8274:11246#0/1 U 2904
AF ILLUMINA-E6F4B9:7:12:16070:8233#0/1 U 2904
AF ILLUMINA-E6F4B9:7:14:17299:20230#0/1 U 2904
AF ILLUMINA-E6F4B9:7:23:16231:7388#0/1 U 2904
AF ILLUMINA-E6F4B9:7:24:10534:4030#0/1 U 2904
AF ILLUMINA-E6F4B9:7:29:4550:12993#0/1 U 2904
AF ILLUMINA-E6F4B9:7:30:16415:10318#0/1 U 2904
AF ILLUMINA-E6F4B9:7:33:11921:11263#0/1 U 2904
AF ILLUMINA-E6F4B9:7:34:16128:19058#0/1 U 2904
AF ILLUMINA-E6F4B9:7:41:16968:9819#0/1 U 2904
AF ILLUMINA-E6F4B9:7:43:5180:8492#0/1 U 2904
AF ILLUMINA-E6F4B9:7:44:8296:16467#0/1 U 2904
AF ILLUMINA-E6F4B9:7:45:17189:2524#0/1 U 2904
AF ILLUMINA-E6F4B9:7:45:18958:17751#0/1 U 2904
AF ILLUMINA-E6F4B9:7:46:4872:2938#0/1 U 2904
AF ILLUMINA-E6F4B9:7:53:14873:15126#0/1 U 2904
AF ILLUMINA-E6F4B9:7:57:5673:11661#0/1 U 2904
AF ILLUMINA-E6F4B9:7:61:14630:18240#0/1 U 2904
AF ILLUMINA-E6F4B9:7:62:9302:10371#0/1 U 2904
AF ILLUMINA-E6F4B9:7:68:3318:19692#0/1 U 2904
AF ILLUMINA-E6F4B9:7:72:11391:13611#0/1 U 2904
AF ILLUMINA-E6F4B9:7:73:6164:9414#0/1 U 2904
AF ILLUMINA-E6F4B9:7:78:17655:3815#0/1 U 2904
AF ILLUMINA-E6F4B9:7:79:15538:9282#0/1 U 2904
AF ILLUMINA-E6F4B9:7:81:6081:19786#0/1 U 2904
AF ILLUMINA-E6F4B9:7:83:2140:16398#0/1 U 2904
AF ILLUMINA-E6F4B9:7:84:16382:18800#0/1 U 2904
AF ILLUMINA-E6F4B9:7:86:15586:6427#0/1 U 2904
AF ILLUMINA-E6F4B9:7:86:6660:11760#0/1 U 2904
AF ILLUMINA-E6F4B9:7:89:11579:16070#0/1 U 2904
AF ILLUMINA-E6F4B9:7:94:16919:2764#0/1 U 2904
AF ILLUMINA-E6F4B9:7:94:10495:14247#0/1 U 2904
AF ILLUMINA-E6F4B9:7:97:1858:9353#0/1 U 2904
AF ILLUMINA-E6F4B9:7:98:7921:17039#0/1 U 2904
AF ILLUMINA-E6F4B9:7:100:11416:1472#0/1 U 2904
AF ILLUMINA-E6F4B9:7:102:3213:1910#0/1 U 2904
AF ILLUMINA-E6F4B9:7:103:11922:12912#0/1 U 2904
AF ILLUMINA-E6F4B9:7:104:3519:15281#0/1 U 2904
AF ILLUMINA-E6F4B9:7:105:11523:19660#0/1 U 2904
AF ILLUMINA-E6F4B9:7:106:17671:16866#0/1 U 2904
AF ILLUMINA-E6F4B9:7:108:15111:14146#0/1 U 2904
AF ILLUMINA-E6F4B9:7:110:17338:16013#0/1 U 2904
AF ILLUMINA-E6F4B9:7:112:14885:1455#0/1 U 2904
AF ILLUMINA-E6F4B9:7:113:12238:17882#0/1 U 2904
AF ILLUMINA-E6F4B9:7:115:6183:20718#0/1 U 2904
AF ILLUMINA-E6F4B9:7:118:14522:10929#0/1 U 2904
AF ILLUMINA-E6F4B9:7:120:5493:6012#0/1 U 2904
AF ILLUMINA-E6F4B9:7:1:12397:1983#0/1 U 2905
AF ILLUMINA-E6F4B9:7:5:7778:16270#0/1 U 2905
AF ILLUMINA-E6F4B9:7:8:11152:18972#0/1 U 2905
AF ILLUMINA-E6F4B9:7:10:6436:7056#0/1 U 2905
AF ILLUMINA-E6F4B9:7:12:16177:17513#0/1 U 2905
AF ILLUMINA-E6F4B9:7:21:12769:5709#0/1 U 2905
AF ILLUMINA-E6F4B9:7:29:16191:6253#0/1 U 2905
AF ILLUMINA-E6F4B9:7:30:11528:10725#0/1 U 2905
AF ILLUMINA-E6F4B9:7:36:8927:2684#0/1 U 2905
AF ILLUMINA-E6F4B9:7:41:3955:11622#0/1 U 2905
AF ILLUMINA-E6F4B9:7:41:9926:15889#0/1 U 2905
AF ILLUMINA-E6F4B9:7:43:11082:6705#0/1 U 2905
AF ILLUMINA-E6F4B9:7:44:10582:21282#0/1 U 2905
AF ILLUMINA-E6F4B9:7:48:10771:10786#0/1 U 2905
AF ILLUMINA-E6F4B9:7:54:2232:10400#0/1 U 2905
AF ILLUMINA-E6F4B9:7:55:2783:3940#0/1 U 2905
AF ILLUMINA-E6F4B9:7:57:4593:1888#0/1 U 2905
AF ILLUMINA-E6F4B9:7:58:8053:2214#0/1 U 2905
AF ILLUMINA-E6F4B9:7:60:7856:16271#0/1 U 2905
AF ILLUMINA-E6F4B9:7:62:11829:3982#0/1 U 2905
AF ILLUMINA-E6F4B9:7:63:9796:8949#0/1 U 2905
AF ILLUMINA-E6F4B9:7:63:19090:18318#0/1 U 2905
AF ILLUMINA-E6F4B9:7:65:18066:15006#0/1 U 2905
AF ILLUMINA-E6F4B9:7:71:3843:11035#0/1 U 2905
AF ILLUMINA-E6F4B9:7:78:8556:17682#0/1 U 2905
AF ILLUMINA-E6F4B9:7:80:4131:18488#0/1 U 2905
AF ILLUMINA-E6F4B9:7:81:16872:6523#0/1 U 2905
AF ILLUMINA-E6F4B9:7:82:13251:1998#0/1 U 2905
AF ILLUMINA-E6F4B9:7:82:11989:4519#0/1 U 2905
AF ILLUMINA-E6F4B9:7:85:10237:21274#0/1 U 2905
AF ILLUMINA-E6F4B9:7:87:10448:12874#0/1 U 2905
AF ILLUMINA-E6F4B9:7:90:1264:11247#0/1 U 2905
AF ILLUMINA-E6F4B9:7:90:2994:12067#0/1 U 2905
AF ILLUMINA-E6F4B9:7:90:2140:15426#0/1 U 2905
AF ILLUMINA-E6F4B9:7:90:14301:21006#0/1 U 2905
AF ILLUMINA-E6F4B9:7:92:9280:17118#0/1 U 2905
AF ILLUMINA-E6F4B9:7:96:4327:3703#0/1 U 2905
AF ILLUMINA-E6F4B9:7:96:1679:8053#0/1 U 2905
AF ILLUMINA-E6F4B9:7:99:16358:14429#0/1 U 2905
AF ILLUMINA-E6F4B9:7:102:4402:5954#0/1 U 2905
AF ILLUMINA-E6F4B9:7:106:7028:9349#0/1 U 2905
AF ILLUMINA-E6F4B9:7:110:9000:4651#0/1 U 2905
AF ILLUMINA-E6F4B9:7:6:9538:7714#0/1 U 2906
AF ILLUMINA-E6F4B9:7:8:2210:4744#0/1 U 2906
AF ILLUMINA-E6F4B9:7:8:17089:19980#0/1 U 2906
AF ILLUMINA-E6F4B9:7:11:3322:12926#0/1 U 2906
AF ILLUMINA-E6F4B9:7:11:9642:13128#0/1 U 2906
AF ILLUMINA-E6F4B9:7:19:4442:15542#0/1 U 2906
AF ILLUMINA-E6F4B9:7:25:9286:7278#0/1 U 2906
AF ILLUMINA-E6F4B9:7:26:14966:5388#0/1 U 2906
AF ILLUMINA-E6F4B9:7:26:11094:14482#0/1 U 2906
AF ILLUMINA-E6F4B9:7:27:12915:2123#0/1 U 2906
AF ILLUMINA-E6F4B9:7:28:16382:14577#0/1 U 2906
AF ILLUMINA-E6F4B9:7:31:18824:7793#0/1 U 2906
AF ILLUMINA-E6F4B9:7:37:19330:13821#0/1 U 2906
AF ILLUMINA-E6F4B9:7:38:8724:15787#0/1 U 2906
AF ILLUMINA-E6F4B9:7:38:7792:16937#0/1 U 2906
AF ILLUMINA-E6F4B9:7:40:5691:13516#0/1 U 2906
AF ILLUMINA-E6F4B9:7:44:10653:5567#0/1 U 2906
AF ILLUMINA-E6F4B9:7:46:19803:10646#0/1 U 2906
AF ILLUMINA-E6F4B9:7:48:13708:5473#0/1 U 2906
AF ILLUMINA-E6F4B9:7:61:3490:17099#0/1 U 2906
AF ILLUMINA-E6F4B9:7:62:9830:19475#0/1 U 2906
AF ILLUMINA-E6F4B9:7:65:19594:11094#0/1 U 2906
AF ILLUMINA-E6F4B9:7:66:18729:5885#0/1 U 2906
AF ILLUMINA-E6F4B9:7:67:4413:16168#0/1 U 2906
AF ILLUMINA-E6F4B9:7:68:1061:14570#0/1 U 2906
AF ILLUMINA-E6F4B9:7:70:3474:3960#0/1 U 2906
AF ILLUMINA-E6F4B9:7:73:8429:2031#0/1 U 2906
AF ILLUMINA-E6F4B9:7:73:12243:4274#0/1 U 2906
AF ILLUMINA-E6F4B9:7:73:9216:17784#0/1 U 2906
AF ILLUMINA-E6F4B9:7:74:11395:6935#0/1 U 2906
AF ILLUMINA-E6F4B9:7:75:5727:11438#0/1 U 2906
AF ILLUMINA-E6F4B9:7:75:16406:20524#0/1 U 2906
AF ILLUMINA-E6F4B9:7:79:12756:9990#0/1 U 2906
AF ILLUMINA-E6F4B9:7:83:19508:5812#0/1 U 2906
AF ILLUMINA-E6F4B9:7:86:1597:6188#0/1 U 2906
AF ILLUMINA-E6F4B9:7:88:15013:14203#0/1 U 2906
AF ILLUMINA-E6F4B9:7:89:11508:15540#0/1 U 2906
AF ILLUMINA-E6F4B9:7:90:2276:21044#0/1 U 2906
AF ILLUMINA-E6F4B9:7:93:12644:3286#0/1 U 2906
AF ILLUMINA-E6F4B9:7:94:8828:2791#0/1 U 2906
AF ILLUMINA-E6F4B9:7:95:3445:18275#0/1 U 2906
AF ILLUMINA-E6F4B9:7:100:2674:2251#0/1 U 2906
AF ILLUMINA-E6F4B9:7:100:8894:4015#0/1 U 2906
AF ILLUMINA-E6F4B9:7:101:5750:10566#0/1 U 2906
AF ILLUMINA-E6F4B9:7:107:16555:15369#0/1 U 2906
AF ILLUMINA-E6F4B9:7:108:3802:15813#0/1 U 2906
AF ILLUMINA-E6F4B9:7:112:7134:4403#0/1 U 2906
AF ILLUMINA-E6F4B9:7:113:7720:15004#0/1 U 2906
AF ILLUMINA-E6F4B9:7:116:8795:12488#0/1 U 2906
AF ILLUMINA-E6F4B9:7:84:1028:7369#0/1 U 2906
AF ILLUMINA-E6F4B9:7:1:9787:3088#0/1 U 2907
AF ILLUMINA-E6F4B9:7:1:3491:9154#0/1 U 2907
AF ILLUMINA-E6F4B9:7:1:14443:16342#0/1 U 2907
AF ILLUMINA-E6F4B9:7:2:17328:8222#0/1 U 2907
AF ILLUMINA-E6F4B9:7:2:19711:8801#0/1 U 2907
AF ILLUMINA-E6F4B9:7:2:2645:11773#0/1 U 2907
AF ILLUMINA-E6F4B9:7:3:8498:16221#0/1 U 2907
AF ILLUMINA-E6F4B9:7:6:5275:6559#0/1 U 2907
AF ILLUMINA-E6F4B9:7:6:6256:12893#0/1 U 2907
AF ILLUMINA-E6F4B9:7:7:9446:17924#0/1 U 2907
AF ILLUMINA-E6F4B9:7:8:5878:3050#0/1 U 2907
AF ILLUMINA-E6F4B9:7:10:7884:19130#0/1 U 2907
AF ILLUMINA-E6F4B9:7:11:6660:3607#0/1 U 2907
AF ILLUMINA-E6F4B9:7:13:10146:12363#0/1 U 2907
AF ILLUMINA-E6F4B9:7:14:2692:16087#0/1 U 2907
AF ILLUMINA-E6F4B9:7:14:12531:19627#0/1 U 2907
AF ILLUMINA-E6F4B9:7:14:2976:20287#0/1 U 2907
AF ILLUMINA-E6F4B9:7:15:3814:13815#0/1 U 2907
AF ILLUMINA-E6F4B9:7:15:18854:19595#0/1 U 2907
AF ILLUMINA-E6F4B9:7:16:16797:19617#0/1 U 2907
AF ILLUMINA-E6F4B9:7:17:15904:12692#0/1 U 2907
AF ILLUMINA-E6F4B9:7:17:6525:20040#0/1 U 2907
AF ILLUMINA-E6F4B9:7:20:2769:3301#0/1 U 2907
AF ILLUMINA-E6F4B9:7:22:5576:21190#0/1 U 2907
AF ILLUMINA-E6F4B9:7:23:10741:14065#0/1 U 2907
AF ILLUMINA-E6F4B9:7:23:10959:17014#0/1 U 2907
AF ILLUMINA-E6F4B9:7:24:6188:9419#0/1 U 2907
AF ILLUMINA-E6F4B9:7:25:11483:11317#0/1 U 2907
AF ILLUMINA-E6F4B9:7:26:7094:8602#0/1 U 2907
AF ILLUMINA-E6F4B9:7:27:13075:7195#0/1 U 2907
AF ILLUMINA-E6F4B9:7:28:18271:4021#0/1 U 2907
AF ILLUMINA-E6F4B9:7:30:11887:9679#0/1 U 2907
AF ILLUMINA-E6F4B9:7:30:1494:14307#0/1 U 2907
AF ILLUMINA-E6F4B9:7:30:13119:15182#0/1 U 2907
AF ILLUMINA-E6F4B9:7:31:1674:9580#0/1 U 2907
AF ILLUMINA-E6F4B9:7:32:3075:6198#0/1 U 2907
AF ILLUMINA-E6F4B9:7:32:12783:10903#0/1 U 2907
AF ILLUMINA-E6F4B9:7:32:10611:14821#0/1 U 2907
AF ILLUMINA-E6F4B9:7:33:3959:9603#0/1 U 2907
AF ILLUMINA-E6F4B9:7:34:4112:6315#0/1 U 2907
AF ILLUMINA-E6F4B9:7:36:2577:10757#0/1 U 2907
AF ILLUMINA-E6F4B9:7:37:11498:3765#0/1 U 2907
AF ILLUMINA-E6F4B9:7:37:18021:10335#0/1 U 2907
AF ILLUMINA-E6F4B9:7:37:11058:18036#0/1 U 2907
AF ILLUMINA-E6F4B9:7:38:18569:2923#0/1 U 2907
AF ILLUMINA-E6F4B9:7:38:14758:20137#0/1 U 2907
AF ILLUMINA-E6F4B9:7:39:11811:12243#0/1 U 2907
AF ILLUMINA-E6F4B9:7:40:9745:3177#0/1 U 2907
AF ILLUMINA-E6F4B9:7:40:18654:12001#0/1 U 2907
AF ILLUMINA-E6F4B9:7:40:6189:18561#0/1 U 2907
AF ILLUMINA-E6F4B9:7:41:5363:20010#0/1 U 2907
AF ILLUMINA-E6F4B9:7:42:7313:11919#0/1 U 2907
AF ILLUMINA-E6F4B9:7:43:7842:4200#0/1 U 2907
AF ILLUMINA-E6F4B9:7:43:8621:5810#0/1 U 2907
AF ILLUMINA-E6F4B9:7:44:2906:9920#0/1 U 2907
AF ILLUMINA-E6F4B9:7:44:10946:13699#0/1 U 2907
AF ILLUMINA-E6F4B9:7:45:13620:7964#0/1 U 2907
AF ILLUMINA-E6F4B9:7:46:16452:3694#0/1 U 2907
AF ILLUMINA-E6F4B9:7:47:12382:8956#0/1 U 2907
AF ILLUMINA-E6F4B9:7:48:6981:8157#0/1 U 2907
AF ILLUMINA-E6F4B9:7:48:7922:15814#0/1 U 2907
AF ILLUMINA-E6F4B9:7:50:1228:13850#0/1 U 2907
AF ILLUMINA-E6F4B9:7:50:19809:13864#0/1 U 2907
AF ILLUMINA-E6F4B9:7:50:12054:17857#0/1 U 2907
AF ILLUMINA-E6F4B9:7:51:12340:7262#0/1 U 2907
AF ILLUMINA-E6F4B9:7:51:3914:7354#0/1 U 2907
AF ILLUMINA-E6F4B9:7:51:2536:10472#0/1 U 2907
AF ILLUMINA-E6F4B9:7:51:3534:11836#0/1 U 2907
AF ILLUMINA-E6F4B9:7:51:7142:13349#0/1 U 2907
AF ILLUMINA-E6F4B9:7:52:8926:2434#0/1 U 2907
AF ILLUMINA-E6F4B9:7:52:15228:4805#0/1 U 2907
AF ILLUMINA-E6F4B9:7:53:16881:2191#0/1 U 2907
AF ILLUMINA-E6F4B9:7:53:10352:9231#0/1 U 2907
AF ILLUMINA-E6F4B9:7:53:16642:17540#0/1 U 2907
AF ILLUMINA-E6F4B9:7:54:11668:7930#0/1 U 2907
AF ILLUMINA-E6F4B9:7:58:12161:9852#0/1 U 2907
AF ILLUMINA-E6F4B9:7:58:1214:14162#0/1 U 2907
AF ILLUMINA-E6F4B9:7:58:14894:20452#0/1 U 2907
AF ILLUMINA-E6F4B9:7:59:4132:19810#0/1 U 2907
AF ILLUMINA-E6F4B9:7:62:15635:15736#0/1 U 2907
AF ILLUMINA-E6F4B9:7:63:12160:3331#0/1 U 2907
AF ILLUMINA-E6F4B9:7:63:13912:20153#0/1 U 2907
AF ILLUMINA-E6F4B9:7:64:10202:4888#0/1 U 2907
AF ILLUMINA-E6F4B9:7:64:5077:5420#0/1 U 2907
AF ILLUMINA-E6F4B9:7:64:4998:10804#0/1 U 2907
AF ILLUMINA-E6F4B9:7:65:9482:9528#0/1 U 2907
AF ILLUMINA-E6F4B9:7:65:6357:12607#0/1 U 2907
AF ILLUMINA-E6F4B9:7:66:11917:13632#0/1 U 2907
AF ILLUMINA-E6F4B9:7:67:11247:15934#0/1 U 2907
AF ILLUMINA-E6F4B9:7:68:6641:1088#0/1 U 2907
AF ILLUMINA-E6F4B9:7:68:3175:16183#0/1 U 2907
AF ILLUMINA-E6F4B9:7:69:12334:9881#0/1 U 2907
AF ILLUMINA-E6F4B9:7:69:5625:15259#0/1 U 2907
AF ILLUMINA-E6F4B9:7:69:7740:20785#0/1 U 2907
AF ILLUMINA-E6F4B9:7:70:12518:5327#0/1 U 2907
AF ILLUMINA-E6F4B9:7:72:1159:3721#0/1 U 2907
AF ILLUMINA-E6F4B9:7:73:10107:1534#0/1 U 2907
AF ILLUMINA-E6F4B9:7:73:11533:2055#0/1 U 2907
AF ILLUMINA-E6F4B9:7:73:11258:2248#0/1 U 2907
AF ILLUMINA-E6F4B9:7:74:7803:6123#0/1 U 2907
AF ILLUMINA-E6F4B9:7:77:16596:10628#0/1 U 2907
AF ILLUMINA-E6F4B9:7:77:17807:12139#0/1 U 2907
AF ILLUMINA-E6F4B9:7:77:12661:13605#0/1 U 2907
AF ILLUMINA-E6F4B9:7:78:3422:5826#0/1 U 2907
AF ILLUMINA-E6F4B9:7:79:17535:1856#0/1 U 2907
AF ILLUMINA-E6F4B9:7:79:6935:5132#0/1 U 2907
AF ILLUMINA-E6F4B9:7:79:4814:13477#0/1 U 2907
AF ILLUMINA-E6F4B9:7:80:9339:12035#0/1 U 2907
AF ILLUMINA-E6F4B9:7:81:9542:9409#0/1 U 2907
AF ILLUMINA-E6F4B9:7:83:12696:1966#0/1 U 2907
AF ILLUMINA-E6F4B9:7:84:19334:3354#0/1 U 2907
AF ILLUMINA-E6F4B9:7:84:15145:4159#0/1 U 2907
AF ILLUMINA-E6F4B9:7:84:19594:10546#0/1 U 2907
AF ILLUMINA-E6F4B9:7:85:19307:3449#0/1 U 2907
AF ILLUMINA-E6F4B9:7:85:7560:13691#0/1 U 2907
AF ILLUMINA-E6F4B9:7:86:15576:11385#0/1 U 2907
AF ILLUMINA-E6F4B9:7:86:1515:16692#0/1 U 2907
AF ILLUMINA-E6F4B9:7:87:6082:14088#0/1 U 2907
AF ILLUMINA-E6F4B9:7:87:17618:15652#0/1 U 2907
AF ILLUMINA-E6F4B9:7:87:7765:18085#0/1 U 2907
AF ILLUMINA-E6F4B9:7:90:5988:14346#0/1 U 2907
AF ILLUMINA-E6F4B9:7:90:16973:19956#0/1 U 2907
AF ILLUMINA-E6F4B9:7:90:17471:21005#0/1 U 2907
AF ILLUMINA-E6F4B9:7:91:12101:1577#0/1 U 2907
AF ILLUMINA-E6F4B9:7:91:7269:19584#0/1 U 2907
AF ILLUMINA-E6F4B9:7:92:5549:1039#0/1 U 2907
AF ILLUMINA-E6F4B9:7:92:16023:13029#0/1 U 2907
AF ILLUMINA-E6F4B9:7:92:9583:17574#0/1 U 2907
AF ILLUMINA-E6F4B9:7:93:12361:6726#0/1 U 2907
AF ILLUMINA-E6F4B9:7:94:10397:6611#0/1 U 2907
AF ILLUMINA-E6F4B9:7:95:7842:7705#0/1 U 2907
AF ILLUMINA-E6F4B9:7:95:11758:10966#0/1 U 2907
AF ILLUMINA-E6F4B9:7:95:14628:20223#0/1 U 2907
AF ILLUMINA-E6F4B9:7:96:7343:2180#0/1 U 2907
AF ILLUMINA-E6F4B9:7:96:12830:9767#0/1 U 2907
AF ILLUMINA-E6F4B9:7:96:15430:15058#0/1 U 2907
AF ILLUMINA-E6F4B9:7:97:6592:8968#0/1 U 2907
AF ILLUMINA-E6F4B9:7:97:3209:13884#0/1 U 2907
AF ILLUMINA-E6F4B9:7:98:16442:18051#0/1 U 2907
AF ILLUMINA-E6F4B9:7:99:10929:7755#0/1 U 2907
AF ILLUMINA-E6F4B9:7:99:7856:18506#0/1 U 2907
AF ILLUMINA-E6F4B9:7:100:11101:3559#0/1 U 2907
AF ILLUMINA-E6F4B9:7:101:7538:18588#0/1 U 2907
AF ILLUMINA-E6F4B9:7:102:4759:4478#0/1 U 2907
AF ILLUMINA-E6F4B9:7:102:3393:9159#0/1 U 2907
AF ILLUMINA-E6F4B9:7:102:11702:9812#0/1 U 2907
AF ILLUMINA-E6F4B9:7:103:8073:2433#0/1 U 2907
AF ILLUMINA-E6F4B9:7:104:18841:6495#0/1 U 2907
AF ILLUMINA-E6F4B9:7:104:6257:16112#0/1 U 2907
AF ILLUMINA-E6F4B9:7:104:6634:19160#0/1 U 2907
AF ILLUMINA-E6F4B9:7:106:16651:8931#0/1 U 2907
AF ILLUMINA-E6F4B9:7:106:10143:10940#0/1 U 2907
AF ILLUMINA-E6F4B9:7:106:1438:15868#0/1 U 2907
AF ILLUMINA-E6F4B9:7:107:17642:2731#0/1 U 2907
AF ILLUMINA-E6F4B9:7:108:4989:2825#0/1 U 2907
AF ILLUMINA-E6F4B9:7:108:1443:16273#0/1 U 2907
AF ILLUMINA-E6F4B9:7:112:15775:2074#0/1 U 2907
AF ILLUMINA-E6F4B9:7:113:3202:13748#0/1 U 2907
AF ILLUMINA-E6F4B9:7:113:8549:14980#0/1 U 2907
AF ILLUMINA-E6F4B9:7:113:1300:17385#0/1 U 2907
AF ILLUMINA-E6F4B9:7:114:4083:2311#0/1 U 2907
AF ILLUMINA-E6F4B9:7:115:18506:1680#0/1 U 2907
AF ILLUMINA-E6F4B9:7:115:7552:8728#0/1 U 2907
AF ILLUMINA-E6F4B9:7:115:15475:13755#0/1 U 2907
AF ILLUMINA-E6F4B9:7:115:8474:16740#0/1 U 2907
AF ILLUMINA-E6F4B9:7:116:5842:6261#0/1 U 2907
AF ILLUMINA-E6F4B9:7:116:18099:7386#0/1 U 2907
AF ILLUMINA-E6F4B9:7:116:4198:15722#0/1 U 2907
AF ILLUMINA-E6F4B9:7:116:16685:16948#0/1 U 2907
AF ILLUMINA-E6F4B9:7:117:18385:13530#0/1 U 2907
AF ILLUMINA-E6F4B9:7:118:3916:18486#0/1 U 2907
AF ILLUMINA-E6F4B9:7:119:18342:9724#0/1 U 2907
AF ILLUMINA-E6F4B9:7:119:3176:15554#0/1 U 2907
AF ILLUMINA-E6F4B9:7:120:2928:13560#0/1 U 2907
AF ILLUMINA-E6F4B9:7:1:6476:14469#0/1 U 2908
AF ILLUMINA-E6F4B9:7:2:9027:20220#0/1 U 2908
AF ILLUMINA-E6F4B9:7:3:14243:14723#0/1 U 2908
AF ILLUMINA-E6F4B9:7:4:17054:3297#0/1 U 2908
AF ILLUMINA-E6F4B9:7:4:4825:18905#0/1 U 2908
AF ILLUMINA-E6F4B9:7:6:2731:9768#0/1 U 2908
AF ILLUMINA-E6F4B9:7:6:13715:10066#0/1 U 2908
AF ILLUMINA-E6F4B9:7:8:5990:11337#0/1 U 2908
AF ILLUMINA-E6F4B9:7:8:15980:14704#0/1 U 2908
AF ILLUMINA-E6F4B9:7:9:3694:7170#0/1 U 2908
AF ILLUMINA-E6F4B9:7:11:12539:13452#0/1 U 2908
AF ILLUMINA-E6F4B9:7:13:13911:7223#0/1 U 2908
AF ILLUMINA-E6F4B9:7:14:14630:18299#0/1 U 2908
AF ILLUMINA-E6F4B9:7:16:12834:17866#0/1 U 2908
AF ILLUMINA-E6F4B9:7:17:13435:16180#0/1 U 2908
AF ILLUMINA-E6F4B9:7:22:12481:7491#0/1 U 2908
AF ILLUMINA-E6F4B9:7:22:4649:9490#0/1 U 2908
AF ILLUMINA-E6F4B9:7:24:16146:7615#0/1 U 2908
AF ILLUMINA-E6F4B9:7:25:13731:6731#0/1 U 2908
AF ILLUMINA-E6F4B9:7:26:12773:17822#0/1 U 2908
AF ILLUMINA-E6F4B9:7:27:9892:1708#0/1 U 2908
AF ILLUMINA-E6F4B9:7:27:13993:11216#0/1 U 2908
AF ILLUMINA-E6F4B9:7:29:13123:11791#0/1 U 2908
AF ILLUMINA-E6F4B9:7:29:10041:15139#0/1 U 2908
AF ILLUMINA-E6F4B9:7:32:16191:15968#0/1 U 2908
AF ILLUMINA-E6F4B9:7:32:4850:17144#0/1 U 2908
AF ILLUMINA-E6F4B9:7:33:15788:6706#0/1 U 2908
AF ILLUMINA-E6F4B9:7:34:6588:7026#0/1 U 2908
AF ILLUMINA-E6F4B9:7:34:16678:10220#0/1 U 2908
AF ILLUMINA-E6F4B9:7:35:4073:16057#0/1 U 2908
AF ILLUMINA-E6F4B9:7:35:5013:19211#0/1 U 2908
AF ILLUMINA-E6F4B9:7:36:18960:2132#0/1 U 2908
AF ILLUMINA-E6F4B9:7:37:12585:8690#0/1 U 2908
AF ILLUMINA-E6F4B9:7:39:14609:4339#0/1 U 2908
AF ILLUMINA-E6F4B9:7:40:11086:18820#0/1 U 2908
AF ILLUMINA-E6F4B9:7:43:12101:10627#0/1 U 2908
AF ILLUMINA-E6F4B9:7:43:13443:12925#0/1 U 2908
AF ILLUMINA-E6F4B9:7:44:4570:4434#0/1 U 2908
AF ILLUMINA-E6F4B9:7:44:7994:9575#0/1 U 2908
AF ILLUMINA-E6F4B9:7:44:4486:10136#0/1 U 2908
AF ILLUMINA-E6F4B9:7:44:8006:19662#0/1 U 2908
AF ILLUMINA-E6F4B9:7:47:15890:14049#0/1 U 2908
AF ILLUMINA-E6F4B9:7:48:14274:12334#0/1 U 2908
AF ILLUMINA-E6F4B9:7:50:2611:6829#0/1 U 2908
AF ILLUMINA-E6F4B9:7:51:18589:15693#0/1 U 2908
AF ILLUMINA-E6F4B9:7:53:9978:3409#0/1 U 2908
AF ILLUMINA-E6F4B9:7:54:3202:2761#0/1 U 2908
AF ILLUMINA-E6F4B9:7:54:9452:4370#0/1 U 2908
AF ILLUMINA-E6F4B9:7:55:7538:1191#0/1 U 2908
AF ILLUMINA-E6F4B9:7:55:14263:5106#0/1 U 2908
AF ILLUMINA-E6F4B9:7:56:8216:9144#0/1 U 2908
AF ILLUMINA-E6F4B9:7:57:19031:2217#0/1 U 2908
AF ILLUMINA-E6F4B9:7:57:11780:14978#0/1 U 2908
AF ILLUMINA-E6F4B9:7:57:13151:18845#0/1 U 2908
AF ILLUMINA-E6F4B9:7:58:6020:3495#0/1 U 2908
AF ILLUMINA-E6F4B9:7:58:7714:6346#0/1 U 2908
AF ILLUMINA-E6F4B9:7:58:17143:8504#0/1 U 2908
AF ILLUMINA-E6F4B9:7:59:7216:16442#0/1 U 2908
AF ILLUMINA-E6F4B9:7:60:15992:17419#0/1 U 2908
AF ILLUMINA-E6F4B9:7:60:12985:19929#0/1 U 2908
AF ILLUMINA-E6F4B9:7:61:8084:5243#0/1 U 2908
AF ILLUMINA-E6F4B9:7:61:11080:13850#0/1 U 2908
AF ILLUMINA-E6F4B9:7:61:16122:18418#0/1 U 2908
AF ILLUMINA-E6F4B9:7:62:13729:3229#0/1 U 2908
AF ILLUMINA-E6F4B9:7:64:9533:5719#0/1 U 2908
AF ILLUMINA-E6F4B9:7:68:12429:11082#0/1 U 2908
AF ILLUMINA-E6F4B9:7:68:12670:15853#0/1 U 2908
AF ILLUMINA-E6F4B9:7:68:10408:18421#0/1 U 2908
AF ILLUMINA-E6F4B9:7:69:6633:3477#0/1 U 2908
AF ILLUMINA-E6F4B9:7:69:14208:14942#0/1 U 2908
AF ILLUMINA-E6F4B9:7:70:14664:19879#0/1 U 2908
AF ILLUMINA-E6F4B9:7:72:16591:19593#0/1 U 2908
AF ILLUMINA-E6F4B9:7:73:8144:10901#0/1 U 2908
AF ILLUMINA-E6F4B9:7:73:3368:14457#0/1 U 2908
AF ILLUMINA-E6F4B9:7:74:14308:3550#0/1 U 2908
AF ILLUMINA-E6F4B9:7:75:7810:7951#0/1 U 2908
AF ILLUMINA-E6F4B9:7:76:11104:15844#0/1 U 2908
AF ILLUMINA-E6F4B9:7:77:15114:19246#0/1 U 2908
AF ILLUMINA-E6F4B9:7:79:12173:14889#0/1 U 2908
AF ILLUMINA-E6F4B9:7:79:10831:15621#0/1 U 2908
AF ILLUMINA-E6F4B9:7:81:6999:10853#0/1 U 2908
AF ILLUMINA-E6F4B9:7:81:16008:14367#0/1 U 2908
AF ILLUMINA-E6F4B9:7:81:12738:20683#0/1 U 2908
AF ILLUMINA-E6F4B9:7:84:6921:9047#0/1 U 2908
AF ILLUMINA-E6F4B9:7:87:19278:10142#0/1 U 2908
AF ILLUMINA-E6F4B9:7:88:13310:14953#0/1 U 2908
AF ILLUMINA-E6F4B9:7:89:17273:6270#0/1 U 2908
AF ILLUMINA-E6F4B9:7:89:5394:18798#0/1 U 2908
AF ILLUMINA-E6F4B9:7:91:8115:7891#0/1 U 2908
AF ILLUMINA-E6F4B9:7:92:12048:21218#0/1 U 2908
AF ILLUMINA-E6F4B9:7:93:10975:19367#0/1 U 2908
AF ILLUMINA-E6F4B9:7:95:17258:3857#0/1 U 2908
AF ILLUMINA-E6F4B9:7:95:9852:4644#0/1 U 2908
AF ILLUMINA-E6F4B9:7:96:5233:1873#0/1 U 2908
AF ILLUMINA-E6F4B9:7:96:18113:6056#0/1 U 2908
AF ILLUMINA-E6F4B9:7:96:4682:9079#0/1 U 2908
AF ILLUMINA-E6F4B9:7:97:13644:1588#0/1 U 2908
AF ILLUMINA-E6F4B9:7:97:10146:3730#0/1 U 2908
AF ILLUMINA-E6F4B9:7:97:12720:15533#0/1 U 2908
AF ILLUMINA-E6F4B9:7:100:4105:17707#0/1 U 2908
AF ILLUMINA-E6F4B9:7:102:8145:5364#0/1 U 2908
AF ILLUMINA-E6F4B9:7:102:19699:9799#0/1 U 2908
AF ILLUMINA-E6F4B9:7:102:7681:11354#0/1 U 2908
AF ILLUMINA-E6F4B9:7:105:12150:17523#0/1 U 2908
AF ILLUMINA-E6F4B9:7:106:6305:8824#0/1 U 2908
AF ILLUMINA-E6F4B9:7:107:6162:16847#0/1 U 2908
AF ILLUMINA-E6F4B9:7:108:10090:15172#0/1 U 2908
AF ILLUMINA-E6F4B9:7:110:9547:4214#0/1 U 2908
AF ILLUMINA-E6F4B9:7:111:12596:12475#0/1 U 2908
AF ILLUMINA-E6F4B9:7:111:15245:13121#0/1 U 2908
AF ILLUMINA-E6F4B9:7:112:10932:17354#0/1 U 2908
AF ILLUMINA-E6F4B9:7:114:18776:16302#0/1 U 2908
AF ILLUMINA-E6F4B9:7:116:11640:2220#0/1 U 2908
AF ILLUMINA-E6F4B9:7:117:8934:2524#0/1 U 2908
AF ILLUMINA-E6F4B9:7:117:11238:4048#0/1 U 2908
AF ILLUMINA-E6F4B9:7:117:12963:9727#0/1 U 2908
AF ILLUMINA-E6F4B9:7:119:17643:20871#0/1 U 2908
AF ILLUMINA-E6F4B9:7:33:8179:9482#0/1 U 2909
AF ILLUMINA-E6F4B9:7:34:3223:2323#0/1 U 2909
AF ILLUMINA-E6F4B9:7:43:15950:2335#0/1 U 2909
AF ILLUMINA-E6F4B9:7:47:14800:12612#0/1 U 2909
AF ILLUMINA-E6F4B9:7:56:9833:3351#0/1 U 2909
AF ILLUMINA-E6F4B9:7:64:18284:12610#0/1 U 2909
AF ILLUMINA-E6F4B9:7:74:11022:12887#0/1 U 2909
AF ILLUMINA-E6F4B9:7:83:13457:2365#0/1 U 2909
AF ILLUMINA-E6F4B9:7:90:7956:2760#0/1 U 2909
AF ILLUMINA-E6F4B9:7:93:6100:11275#0/1 U 2909
AF ILLUMINA-E6F4B9:7:117:9308:17487#0/1 U 2909
AF ILLUMINA-E6F4B9:7:42:15834:11124#0/1 U 2907
AF ILLUMINA-E6F4B9:7:8:7111:13919#0/1 U 2910
AF ILLUMINA-E6F4B9:7:17:16088:1355#0/1 U 2910
AF ILLUMINA-E6F4B9:7:41:6156:7844#0/1 U 2910
AF ILLUMINA-E6F4B9:7:116:14961:12242#0/1 U 2910
AF ILLUMINA-E6F4B9:7:118:11691:14263#0/1 U 2910
AF ILLUMINA-E6F4B9:7:105:2375:11970#0/1 C 2911
AF ILLUMINA-E6F4B9:7:60:9222:20447#0/1 U 2912
AF ILLUMINA-E6F4B9:7:7:4286:12223#0/1 U 2913
AF ILLUMINA-E6F4B9:7:120:10018:3944#0/1 U 2913
AF ILLUMINA-E6F4B9:7:80:12698:17900#0/1 U 2913
AF ILLUMINA-E6F4B9:7:110:4344:2189#0/1 U 2916
AF ILLUMINA-E6F4B9:7:77:11892:3842#0/1 U 2917
AF ILLUMINA-E6F4B9:7:117:1143:7780#0/1 U 2917
AF ILLUMINA-E6F4B9:7:25:13072:5872#0/1 U 2918
AF ILLUMINA-E6F4B9:7:46:4400:12104#0/1 U 2918
AF ILLUMINA-E6F4B9:7:97:5315:9179#0/1 U 2918
AF ILLUMINA-E6F4B9:7:100:18569:5444#0/1 U 2918
AF ILLUMINA-E6F4B9:7:116:5921:16709#0/1 U 2918
AF ILLUMINA-E6F4B9:7:76:7985:20929#0/1 U 2919
AF ILLUMINA-E6F4B9:7:15:6806:17033#0/1 U 2920
AF ILLUMINA-E6F4B9:7:53:3778:4478#0/1 U 2920
AF ILLUMINA-E6F4B9:7:20:19473:9911#0/1 U 2921
AF ILLUMINA-E6F4B9:7:72:17045:18807#0/1 U 2940
AF ILLUMINA-E6F4B9:7:75:2653:8467#0/1 U 2940
AF ILLUMINA-E6F4B9:7:107:13703:2774#0/1 U 2940
AF ILLUMINA-E6F4B9:7:8:9123:12947#0/1 U 2941
AF ILLUMINA-E6F4B9:7:16:16953:17738#0/1 U 2941
AF ILLUMINA-E6F4B9:7:22:10832:4073#0/1 U 2941
AF ILLUMINA-E6F4B9:7:47:18899:15915#0/1 U 2941
AF ILLUMINA-E6F4B9:7:68:17110:18274#0/1 U 2941
AF ILLUMINA-E6F4B9:7:34:14788:11379#0/1 U 2944
AF ILLUMINA-E6F4B9:7:82:8040:8495#0/1 U 2944
AF ILLUMINA-E6F4B9:7:60:7611:14549#0/1 U 2946
AF ILLUMINA-E6F4B9:7:63:2168:11993#0/1 U 2946
AF ILLUMINA-E6F4B9:7:83:14268:1964#0/1 U 2946
AF ILLUMINA-E6F4B9:7:74:13115:16781#0/1 U 2947
AF ILLUMINA-E6F4B9:7:96:10841:21279#0/1 U 2950
AF ILLUMINA-E6F4B9:7:2:5860:3648#0/1 U 2960
AF ILLUMINA-E6F4B9:7:94:7157:1769#0/1 U 2957
AF ILLUMINA-E6F4B9:7:63:11387:13655#0/1 U 2988
AF ILLUMINA-E6F4B9:7:71:9139:18733#0/1 U 2988
AF ILLUMINA-E6F4B9:7:119:14520:16061#0/1 U 2990
AF ILLUMINA-E6F4B9:7:43:3671:12246#0/1 U 2991
AF ILLUMINA-E6F4B9:7:32:13187:20289#0/1 U 2992
AF ILLUMINA-E6F4B9:7:86:14316:18309#0/1 U 2992
AF ILLUMINA-E6F4B9:7:105:4165:4848#0/1 U 2992
AF ILLUMINA-E6F4B9:7:61:12728:5507#0/1 U 2994
AF ILLUMINA-E6F4B9:7:87:15199:18837#0/1 U 2994
AF ILLUMINA-E6F4B9:7:100:19177:19476#0/1 U 2994
AF ILLUMINA-E6F4B9:7:7:8338:9471#0/1 U 2995
AF ILLUMINA-E6F4B9:7:26:17011:3512#0/1 U 2995
AF ILLUMINA-E6F4B9:7:53:4693:8163#0/1 U 2998
AF ILLUMINA-E6F4B9:7:97:13506:12871#0/1 U 2998
AF ILLUMINA-E6F4B9:7:46:13846:15416#0/1 U 2999
AF ILLUMINA-E6F4B9:7:55:6519:15202#0/1 U 2999
AF ILLUMINA-E6F4B9:7:70:3092:16235#0/1 U 2999
AF ILLUMINA-E6F4B9:7:78:18963:10960#0/1 U 2999
AF ILLUMINA-E6F4B9:7:80:5925:13155#0/1 U 2999
AF ILLUMINA-E6F4B9:7:33:18595:19112#0/1 U 3001
AF ILLUMINA-E6F4B9:7:56:19251:13042#0/1 U 3001
AF ILLUMINA-E6F4B9:7:64:14794:3176#0/1 C 3001
AF ILLUMINA-E6F4B9:7:88:4571:8134#0/1 U 3001
AF ILLUMINA-E6F4B9:7:35:19125:12838#0/1 U 3002
AF ILLUMINA-E6F4B9:7:40:18181:8223#0/1 U 3004
AF ILLUMINA-E6F4B9:7:24:13639:14843#0/1 U 3006
AF ILLUMINA-E6F4B9:7:65:7817:14411#0/1 U 3006
AF ILLUMINA-E6F4B9:7:100:4410:5772#0/1 U 3006
AF ILLUMINA-E6F4B9:7:7:10930:20659#0/1 U 3007
AF ILLUMINA-E6F4B9:7:45:14404:11001#0/1 U 3008
AF ILLUMINA-E6F4B9:7:88:5238:6288#0/1 U 3008
AF ILLUMINA-E6F4B9:7:49:4630:8425#0/1 U 3010
AF ILLUMINA-E6F4B9:7:93:15307:7526#0/1 U 3010
AF ILLUMINA-E6F4B9:7:94:18409:7449#0/1 U 3010
AF ILLUMINA-E6F4B9:7:54:11653:19429#0/1 U 3011
AF ILLUMINA-E6F4B9:7:59:5589:5947#0/1 U 3011
AF ILLUMINA-E6F4B9:7:48:9510:10460#0/1 U 3012
AF ILLUMINA-E6F4B9:7:31:8355:8613#0/1 U 3020
AF ILLUMINA-E6F4B9:7:76:18503:8769#0/1 U 3025
AF ILLUMINA-E6F4B9:7:105:4180:14438#0/1 U 3026
AF ILLUMINA-E6F4B9:7:33:14050:2419#0/1 U 3028
AF ILLUMINA-E6F4B9:7:42:13082:15624#0/1 U 3028
AF ILLUMINA-E6F4B9:7:112:1639:4935#0/1 U 3028
AF ILLUMINA-E6F4B9:7:117:6904:9145#0/1 U 3028
AF ILLUMINA-E6F4B9:7:51:1221:18648#0/1 U 3029
AF ILLUMINA-E6F4B9:7:64:5647:8839#0/1 U 3029
AF ILLUMINA-E6F4B9:7:67:7581:13407#0/1 U 3029
AF ILLUMINA-E6F4B9:7:79:6625:17507#0/1 U 3029
AF ILLUMINA-E6F4B9:7:42:4086:4786#0/1 U 3030
AF ILLUMINA-E6F4B9:7:86:16267:4399#0/1 U 3030
AF ILLUMINA-E6F4B9:7:62:5388:5980#0/1 U 3033
AF ILLUMINA-E6F4B9:7:75:13771:5124#0/1 C 3037
AF ILLUMINA-E6F4B9:7:75:11757:15312#0/1 C 3042
AF ILLUMINA-E6F4B9:7:14:13568:2850#0/1 C 3043
AF ILLUMINA-E6F4B9:7:21:18177:18441#0/1 C 3044
AF ILLUMINA-E6F4B9:7:34:14783:6220#0/1 U 3052
AF ILLUMINA-E6F4B9:7:40:17343:5866#0/1 U 3052
AF ILLUMINA-E6F4B9:7:2:1403:10052#0/1 U 3056
AF ILLUMINA-E6F4B9:7:44:2346:19203#0/1 U 3057
AF ILLUMINA-E6F4B9:7:72:9939:18069#0/1 U 3057
AF ILLUMINA-E6F4B9:7:82:6547:3000#0/1 U 3057
AF ILLUMINA-E6F4B9:7:90:1933:16531#0/1 U 3057
AF ILLUMINA-E6F4B9:7:59:10289:20972#0/1 C 3069
AF ILLUMINA-E6F4B9:7:3:10236:6014#0/1 U 3079
AF ILLUMINA-E6F4B9:7:36:5142:19631#0/1 U 3080
AF ILLUMINA-E6F4B9:7:63:2390:8576#0/1 U 3080
AF ILLUMINA-E6F4B9:7:52:15889:10832#0/1 C 3082
AF ILLUMINA-E6F4B9:7:76:7215:4500#0/1 U 3082
AF ILLUMINA-E6F4B9:7:80:2846:1115#0/1 U 3083
AF ILLUMINA-E6F4B9:7:80:17979:12380#0/1 U 3083
AF ILLUMINA-E6F4B9:7:87:6548:15604#0/1 U 3083
AF ILLUMINA-E6F4B9:7:88:8905:4028#0/1 U 3083
AF ILLUMINA-E6F4B9:7:103:11961:5054#0/1 U 3083
AF ILLUMINA-E6F4B9:7:8:19043:11976#0/1 U 3084
AF ILLUMINA-E6F4B9:7:13:3114:6919#0/1 U 3084
AF ILLUMINA-E6F4B9:7:13:14491:10291#0/1 U 3084
AF ILLUMINA-E6F4B9:7:17:15974:18264#0/1 U 3084
AF ILLUMINA-E6F4B9:7:22:7388:16260#0/1 U 3084
AF ILLUMINA-E6F4B9:7:48:9452:14920#0/1 U 3084
AF ILLUMINA-E6F4B9:7:56:13979:13489#0/1 U 3084
AF ILLUMINA-E6F4B9:7:60:5177:15722#0/1 U 3084
AF ILLUMINA-E6F4B9:7:79:14984:14292#0/1 U 3084
AF ILLUMINA-E6F4B9:7:81:5106:4197#0/1 U 3084
AF ILLUMINA-E6F4B9:7:81:9305:21169#0/1 U 3084
AF ILLUMINA-E6F4B9:7:85:19645:3534#0/1 U 3084
AF ILLUMINA-E6F4B9:7:89:15372:19461#0/1 U 3084
AF ILLUMINA-E6F4B9:7:93:14797:6435#0/1 U 3084
AF ILLUMINA-E6F4B9:7:98:12200:7217#0/1 U 3084
AF ILLUMINA-E6F4B9:7:99:4168:16961#0/1 U 3084
AF ILLUMINA-E6F4B9:7:101:4151:10134#0/1 U 3084
AF ILLUMINA-E6F4B9:7:110:17178:17140#0/1 U 3084
AF ILLUMINA-E6F4B9:7:112:12373:4922#0/1 U 3084
AF ILLUMINA-E6F4B9:7:116:3670:5236#0/1 U 3084
AF ILLUMINA-E6F4B9:7:5:4351:1661#0/1 U 3085
AF ILLUMINA-E6F4B9:7:5:1781:13462#0/1 U 3085
AF ILLUMINA-E6F4B9:7:6:17770:8541#0/1 U 3085
AF ILLUMINA-E6F4B9:7:6:4892:10203#0/1 U 3085
AF ILLUMINA-E6F4B9:7:8:7500:21057#0/1 U 3085
AF ILLUMINA-E6F4B9:7:18:5059:4848#0/1 U 3085
AF ILLUMINA-E6F4B9:7:21:13998:8083#0/1 U 3085
AF ILLUMINA-E6F4B9:7:21:14811:8755#0/1 U 3085
AF ILLUMINA-E6F4B9:7:28:3822:1592#0/1 U 3085
AF ILLUMINA-E6F4B9:7:31:14264:3599#0/1 U 3085
AF ILLUMINA-E6F4B9:7:32:14191:12539#0/1 U 3085
AF ILLUMINA-E6F4B9:7:33:15781:4175#0/1 U 3085
AF ILLUMINA-E6F4B9:7:39:18474:13408#0/1 U 3085
AF ILLUMINA-E6F4B9:7:57:7944:3592#0/1 U 3085
AF ILLUMINA-E6F4B9:7:58:14547:19777#0/1 U 3085
AF ILLUMINA-E6F4B9:7:68:6677:18006#0/1 U 3085
AF ILLUMINA-E6F4B9:7:82:9342:12606#0/1 U 3085
AF ILLUMINA-E6F4B9:7:98:17097:10934#0/1 U 3085
AF ILLUMINA-E6F4B9:7:100:13771:19971#0/1 U 3085
AF ILLUMINA-E6F4B9:7:107:6495:9637#0/1 U 3085
AF ILLUMINA-E6F4B9:7:113:5328:18860#0/1 U 3085
AF ILLUMINA-E6F4B9:7:116:1688:8088#0/1 U 3085
AF ILLUMINA-E6F4B9:7:67:14519:19818#0/1 C 3086
AF ILLUMINA-E6F4B9:7:91:4558:11574#0/1 U 3086
AF ILLUMINA-E6F4B9:7:21:3494:6827#0/1 U 3087
AF ILLUMINA-E6F4B9:7:79:15112:4463#0/1 U 3087
AF ILLUMINA-E6F4B9:7:90:3451:20848#0/1 U 3087
AF ILLUMINA-E6F4B9:7:115:5756:11662#0/1 U 3087
AF ILLUMINA-E6F4B9:7:116:17307:5775#0/1 U 3087
AF ILLUMINA-E6F4B9:7:2:12028:4342#0/1 U 3088
AF ILLUMINA-E6F4B9:7:22:12193:13354#0/1 U 3088
AF ILLUMINA-E6F4B9:7:37:17896:19026#0/1 U 3088
AF ILLUMINA-E6F4B9:7:52:10282:4491#0/1 U 3088
AF ILLUMINA-E6F4B9:7:56:3478:20312#0/1 U 3088
AF ILLUMINA-E6F4B9:7:63:1535:7567#0/1 U 3088
AF ILLUMINA-E6F4B9:7:90:7684:5013#0/1 U 3088
AF ILLUMINA-E6F4B9:7:3:6866:14253#0/1 U 3086
AF ILLUMINA-E6F4B9:7:32:3729:16042#0/1 U 3086
AF ILLUMINA-E6F4B9:7:79:7517:16376#0/1 U 3086
AF ILLUMINA-E6F4B9:7:107:16270:9248#0/1 U 3086
AF ILLUMINA-E6F4B9:7:114:3655:6518#0/1 U 3086
AF ILLUMINA-E6F4B9:7:6:4574:10431#0/1 U 3087
AF ILLUMINA-E6F4B9:7:64:15808:12801#0/1 U 3087
AF ILLUMINA-E6F4B9:7:3:6850:1461#0/1 U 3088
AF ILLUMINA-E6F4B9:7:7:10305:15459#0/1 U 3088
AF ILLUMINA-E6F4B9:7:31:4352:14073#0/1 U 3088
AF ILLUMINA-E6F4B9:7:47:12122:4337#0/1 U 3088
AF ILLUMINA-E6F4B9:7:58:4638:10928#0/1 U 3088
AF ILLUMINA-E6F4B9:7:70:3001:19411#0/1 U 3088
AF ILLUMINA-E6F4B9:7:73:13272:11734#0/1 U 3088
AF ILLUMINA-E6F4B9:7:86:6653:6152#0/1 U 3088
AF ILLUMINA-E6F4B9:7:104:4055:3103#0/1 U 3088
AF ILLUMINA-E6F4B9:7:106:11847:19983#0/1 U 3088
AF ILLUMINA-E6F4B9:7:108:8612:12574#0/1 U 3088
AF ILLUMINA-E6F4B9:7:3:4059:19903#0/1 U 3089
AF ILLUMINA-E6F4B9:7:4:14922:11587#0/1 U 3089
AF ILLUMINA-E6F4B9:7:17:7713:21126#0/1 U 3089
AF ILLUMINA-E6F4B9:7:20:13190:2435#0/1 U 3089
AF ILLUMINA-E6F4B9:7:24:16625:1372#0/1 U 3089
AF ILLUMINA-E6F4B9:7:24:4713:2462#0/1 U 3089
AF ILLUMINA-E6F4B9:7:27:3580:10492#0/1 U 3089
AF ILLUMINA-E6F4B9:7:29:16145:8109#0/1 U 3089
AF ILLUMINA-E6F4B9:7:30:4107:3494#0/1 U 3089
AF ILLUMINA-E6F4B9:7:34:1570:7028#0/1 U 3089
AF ILLUMINA-E6F4B9:7:38:8540:5313#0/1 U 3089
AF ILLUMINA-E6F4B9:7:48:6079:13875#0/1 U 3089
AF ILLUMINA-E6F4B9:7:53:9833:16517#0/1 U 3089
AF ILLUMINA-E6F4B9:7:55:10952:13922#0/1 U 3089
AF ILLUMINA-E6F4B9:7:64:3158:15840#0/1 U 3089
AF ILLUMINA-E6F4B9:7:64:6519:17954#0/1 U 3089
AF ILLUMINA-E6F4B9:7:70:4691:2285#0/1 U 3089
AF ILLUMINA-E6F4B9:7:70:4090:4846#0/1 U 3089
AF ILLUMINA-E6F4B9:7:76:17244:5496#0/1 U 3089
AF ILLUMINA-E6F4B9:7:78:6558:11514#0/1 U 3089
AF ILLUMINA-E6F4B9:7:80:14369:10361#0/1 U 3089
AF ILLUMINA-E6F4B9:7:84:5910:18875#0/1 U 3089
AF ILLUMINA-E6F4B9:7:85:4511:12860#0/1 U 3089
AF ILLUMINA-E6F4B9:7:85:14551:15919#0/1 U 3089
AF ILLUMINA-E6F4B9:7:92:2544:17278#0/1 U 3089
AF ILLUMINA-E6F4B9:7:93:4523:8090#0/1 U 3089
AF ILLUMINA-E6F4B9:7:94:5101:9269#0/1 U 3089
AF ILLUMINA-E6F4B9:7:104:18024:18185#0/1 U 3089
AF ILLUMINA-E6F4B9:7:112:16428:17254#0/1 U 3089
AF ILLUMINA-E6F4B9:7:112:13166:20880#0/1 U 3089
AF ILLUMINA-E6F4B9:7:120:11698:7136#0/1 U 3089
AF ILLUMINA-E6F4B9:7:1:19610:17944#0/1 U 3090
AF ILLUMINA-E6F4B9:7:2:4063:19230#0/1 U 3090
AF ILLUMINA-E6F4B9:7:20:2233:2611#0/1 U 3090
AF ILLUMINA-E6F4B9:7:22:15121:14881#0/1 U 3090
AF ILLUMINA-E6F4B9:7:28:16440:13668#0/1 U 3090
AF ILLUMINA-E6F4B9:7:43:17515:9055#0/1 U 3090
AF ILLUMINA-E6F4B9:7:46:3327:8616#0/1 U 3090
AF ILLUMINA-E6F4B9:7:59:14444:7357#0/1 U 3090
AF ILLUMINA-E6F4B9:7:60:12366:2815#0/1 U 3090
AF ILLUMINA-E6F4B9:7:64:7473:6928#0/1 U 3090
AF ILLUMINA-E6F4B9:7:66:3504:17670#0/1 U 3090
AF ILLUMINA-E6F4B9:7:70:2488:9720#0/1 U 3090
AF ILLUMINA-E6F4B9:7:82:16563:17452#0/1 U 3090
AF ILLUMINA-E6F4B9:7:87:2485:5798#0/1 U 3090
AF ILLUMINA-E6F4B9:7:100:4978:3279#0/1 U 3090
AF ILLUMINA-E6F4B9:7:115:10616:15088#0/1 U 3090
AF ILLUMINA-E6F4B9:7:118:13902:7214#0/1 U 3090
AF ILLUMINA-E6F4B9:7:13:18638:17381#0/1 U 3091
AF ILLUMINA-E6F4B9:7:72:12825:14749#0/1 U 3091
AF ILLUMINA-E6F4B9:7:79:19823:17892#0/1 U 3091
AF ILLUMINA-E6F4B9:7:82:18699:6565#0/1 U 3091
AF ILLUMINA-E6F4B9:7:93:17212:12721#0/1 U 3091
AF ILLUMINA-E6F4B9:7:94:18661:5947#0/1 U 3091
AF ILLUMINA-E6F4B9:7:30:7230:8728#0/1 U 3092
AF ILLUMINA-E6F4B9:7:46:5137:2653#0/1 U 3092
AF ILLUMINA-E6F4B9:7:47:15652:21154#0/1 U 3092
AF ILLUMINA-E6F4B9:7:69:9501:18869#0/1 U 3092
AF ILLUMINA-E6F4B9:7:104:5155:2306#0/1 U 3092
AF ILLUMINA-E6F4B9:7:79:10206:7048#0/1 U 3104
AF ILLUMINA-E6F4B9:7:80:7778:13041#0/1 U 3105
AF ILLUMINA-E6F4B9:7:43:7583:10215#0/1 U 3107
AF ILLUMINA-E6F4B9:7:55:10174:14287#0/1 U 3107
AF ILLUMINA-E6F4B9:7:56:10361:8139#0/1 U 3107
AF ILLUMINA-E6F4B9:7:111:7444:18167#0/1 U 3107
AF ILLUMINA-E6F4B9:7:12:13553:15600#0/1 U 3116
AF ILLUMINA-E6F4B9:7:38:17298:11804#0/1 U 3116
AF ILLUMINA-E6F4B9:7:39:4051:4236#0/1 U 3116
AF ILLUMINA-E6F4B9:7:44:2325:13902#0/1 U 3117
AF ILLUMINA-E6F4B9:7:63:3016:5509#0/1 U 3117
AF ILLUMINA-E6F4B9:7:64:12110:12208#0/1 C 3117
AF ILLUMINA-E6F4B9:7:71:1616:19165#0/1 U 3117
AF ILLUMINA-E6F4B9:7:101:3978:15827#0/1 U 3117
AF ILLUMINA-E6F4B9:7:51:15632:6843#0/1 U 3118
AF ILLUMINA-E6F4B9:7:101:16207:18979#0/1 U 3122
AF ILLUMINA-E6F4B9:7:65:1144:10876#0/1 U 3123
AF ILLUMINA-E6F4B9:7:19:19087:2616#0/1 U 3124
AF ILLUMINA-E6F4B9:7:73:15736:15886#0/1 U 3124
AF ILLUMINA-E6F4B9:7:28:19445:7175#0/1 U 3123
AF ILLUMINA-E6F4B9:7:35:12564:14027#0/1 U 3123
AF ILLUMINA-E6F4B9:7:45:17272:11502#0/1 U 3123
AF ILLUMINA-E6F4B9:7:51:2036:12642#0/1 U 3123
AF ILLUMINA-E6F4B9:7:83:3028:4396#0/1 U 3123
AF ILLUMINA-E6F4B9:7:93:11525:1811#0/1 U 3123
AF ILLUMINA-E6F4B9:7:94:18262:5396#0/1 U 3123
AF ILLUMINA-E6F4B9:7:103:18388:21110#0/1 U 3124
AF ILLUMINA-E6F4B9:7:19:8658:7097#0/1 U 3125
AF ILLUMINA-E6F4B9:7:110:4427:15262#0/1 U 3125
AF ILLUMINA-E6F4B9:7:101:13366:3786#0/1 U 3126
AF ILLUMINA-E6F4B9:7:98:4020:16489#0/1 U 3127
AF ILLUMINA-E6F4B9:7:82:18350:2258#0/1 C 3129
AF ILLUMINA-E6F4B9:7:93:1538:13189#0/1 U 3128
AF ILLUMINA-E6F4B9:7:101:17043:19989#0/1 U 3128
AF ILLUMINA-E6F4B9:7:107:2618:15916#0/1 U 3128
AF ILLUMINA-E6F4B9:7:114:7430:8694#0/1 U 3128
AF ILLUMINA-E6F4B9:7:8:5887:10913#0/1 U 3129
AF ILLUMINA-E6F4B9:7:15:14949:6382#0/1 U 3129
AF ILLUMINA-E6F4B9:7:51:7316:5865#0/1 U 3129
AF ILLUMINA-E6F4B9:7:120:1321:6477#0/1 U 3129
AF ILLUMINA-E6F4B9:7:33:3229:12840#0/1 U 3130
AF ILLUMINA-E6F4B9:7:53:8197:11726#0/1 U 3130
AF ILLUMINA-E6F4B9:7:42:6182:16018#0/1 U 3131
AF ILLUMINA-E6F4B9:7:73:13243:4652#0/1 U 3131
AF ILLUMINA-E6F4B9:7:84:6632:16313#0/1 U 3134
AF ILLUMINA-E6F4B9:7:12:6360:6838#0/1 U 3152
AF ILLUMINA-E6F4B9:7:14:8063:16155#0/1 U 3152
AF ILLUMINA-E6F4B9:7:62:3574:15457#0/1 U 3152
AF ILLUMINA-E6F4B9:7:93:1917:3547#0/1 U 3152
AF ILLUMINA-E6F4B9:7:32:16399:7424#0/1 U 3153
AF ILLUMINA-E6F4B9:7:46:14688:12467#0/1 U 3153
AF ILLUMINA-E6F4B9:7:48:2621:7285#0/1 U 3153
AF ILLUMINA-E6F4B9:7:74:8213:1275#0/1 U 3153
AF ILLUMINA-E6F4B9:7:95:18468:14990#0/1 U 3153
AF ILLUMINA-E6F4B9:7:28:18633:16595#0/1 U 3159
AF ILLUMINA-E6F4B9:7:34:7162:7597#0/1 C 3160
AF ILLUMINA-E6F4B9:7:2:11996:1100#0/1 C 3163
AF ILLUMINA-E6F4B9:7:76:7310:16554#0/1 U 3166
AF ILLUMINA-E6F4B9:7:21:15306:9657#0/1 C 3176
AF ILLUMINA-E6F4B9:7:50:3172:8914#0/1 U 3177
AF ILLUMINA-E6F4B9:7:40:11847:20082#0/1 C 3180
AF ILLUMINA-E6F4B9:7:69:17714:4492#0/1 C 3180
AF ILLUMINA-E6F4B9:7:82:7292:10612#0/1 C 3181
AF ILLUMINA-E6F4B9:7:107:5090:13666#0/1 C 3181
AF ILLUMINA-E6F4B9:7:61:17620:16066#0/1 C 3188
AF ILLUMINA-E6F4B9:7:70:9389:16337#0/1 C 3188
AF ILLUMINA-E6F4B9:7:4:13360:19660#0/1 C 3195
AF ILLUMINA-E6F4B9:7:109:12473:7455#0/1 U 3195
AF ILLUMINA-E6F4B9:7:30:14699:5773#0/1 U 3203
AF ILLUMINA-E6F4B9:7:100:6714:1420#0/1 U 3204
AF ILLUMINA-E6F4B9:7:32:1045:1399#0/1 C 3206
AF ILLUMINA-E6F4B9:7:31:11014:4183#0/1 U 3210
AF ILLUMINA-E6F4B9:7:66:8297:13667#0/1 U 3220
AF ILLUMINA-E6F4B9:7:88:10807:11112#0/1 U 3222
AF ILLUMINA-E6F4B9:7:94:12227:13187#0/1 U 3222
AF ILLUMINA-E6F4B9:7:54:14421:15880#0/1 C 3224
AF ILLUMINA-E6F4B9:7:108:18582:6701#0/1 U 3232
AF ILLUMINA-E6F4B9:7:29:12953:13168#0/1 U 3233
AF ILLUMINA-E6F4B9:7:21:19467:19189#0/1 U 3240
AF ILLUMINA-E6F4B9:7:52:13798:19585#0/1 C 3252
AF ILLUMINA-E6F4B9:7:110:2223:8876#0/1 U 3257
AF ILLUMINA-E6F4B9:7:51:12463:19977#0/1 U 3298
AF ILLUMINA-E6F4B9:7:3:12936:6365#0/1 U 3302
AF ILLUMINA-E6F4B9:7:52:9449:19206#0/1 U 3302
AF ILLUMINA-E6F4B9:7:54:6634:17034#0/1 U 3303
AF ILLUMINA-E6F4B9:7:89:7811:19451#0/1 U 3303
AF ILLUMINA-E6F4B9:7:115:9512:20491#0/1 U 3304
AF ILLUMINA-E6F4B9:7:3:5824:19521#0/1 U 3305
AF ILLUMINA-E6F4B9:7:45:16419:20200#0/1 U 3306
AF ILLUMINA-E6F4B9:7:48:10811:3137#0/1 U 3306
AF ILLUMINA-E6F4B9:7:59:15431:6694#0/1 U 3306
AF ILLUMINA-E6F4B9:7:59:18340:21016#0/1 U 3306
AF ILLUMINA-E6F4B9:7:82:14819:19594#0/1 U 3306
AF ILLUMINA-E6F4B9:7:83:1119:3323#0/1 U 3306
AF ILLUMINA-E6F4B9:7:89:15819:5760#0/1 U 3306
AF ILLUMINA-E6F4B9:7:90:14149:13167#0/1 U 3306
AF ILLUMINA-E6F4B9:7:97:6225:13247#0/1 U 3306
AF ILLUMINA-E6F4B9:7:107:10641:18225#0/1 U 3306
AF ILLUMINA-E6F4B9:7:116:15483:8934#0/1 U 3306
AF ILLUMINA-E6F4B9:7:116:17713:10853#0/1 U 3306
AF ILLUMINA-E6F4B9:7:22:17345:20635#0/1 U 3307
AF ILLUMINA-E6F4B9:7:96:15711:1775#0/1 U 3307
AF ILLUMINA-E6F4B9:7:43:16092:14348#0/1 U 3308
AF ILLUMINA-E6F4B9:7:61:10496:5596#0/1 U 3308
AF ILLUMINA-E6F4B9:7:61:5779:13213#0/1 U 3308
AF ILLUMINA-E6F4B9:7:83:2963:20336#0/1 U 3308
AF ILLUMINA-E6F4B9:7:103:14533:4021#0/1 U 3308
AF ILLUMINA-E6F4B9:7:104:4777:2845#0/1 U 3308
AF ILLUMINA-E6F4B9:7:105:12262:10759#0/1 U 3308
AF ILLUMINA-E6F4B9:7:5:8438:21188#0/1 U 3309
AF ILLUMINA-E6F4B9:7:11:18394:8349#0/1 U 3309
AF ILLUMINA-E6F4B9:7:15:8165:17803#0/1 U 3309
AF ILLUMINA-E6F4B9:7:22:6768:17599#0/1 U 3309
AF ILLUMINA-E6F4B9:7:31:18539:5610#0/1 U 3309
AF ILLUMINA-E6F4B9:7:43:12810:10178#0/1 U 3309
AF ILLUMINA-E6F4B9:7:50:17583:11241#0/1 U 3309
AF ILLUMINA-E6F4B9:7:71:12959:15667#0/1 U 3309
AF ILLUMINA-E6F4B9:7:114:9953:9718#0/1 U 3309
AF ILLUMINA-E6F4B9:7:22:15333:10925#0/1 U 3310
AF ILLUMINA-E6F4B9:7:23:4914:2520#0/1 U 3310
AF ILLUMINA-E6F4B9:7:36:3297:19943#0/1 U 3310
AF ILLUMINA-E6F4B9:7:49:18839:3355#0/1 U 3310
AF ILLUMINA-E6F4B9:7:63:9194:3115#0/1 U 3310
AF ILLUMINA-E6F4B9:7:97:4704:13758#0/1 U 3310
AF ILLUMINA-E6F4B9:7:1:7485:3976#0/1 U 3311
AF ILLUMINA-E6F4B9:7:15:6520:8639#0/1 U 3311
AF ILLUMINA-E6F4B9:7:27:8954:18726#0/1 U 3311
AF ILLUMINA-E6F4B9:7:42:10329:7111#0/1 U 3311
AF ILLUMINA-E6F4B9:7:68:15694:19770#0/1 U 3311
AF ILLUMINA-E6F4B9:7:87:4437:13731#0/1 U 3311
AF ILLUMINA-E6F4B9:7:93:16562:6973#0/1 U 3311
AF ILLUMINA-E6F4B9:7:61:14712:13536#0/1 U 3312
AF ILLUMINA-E6F4B9:7:69:16934:9141#0/1 U 3312
AF ILLUMINA-E6F4B9:7:22:17021:15738#0/1 U 3313
AF ILLUMINA-E6F4B9:7:70:3598:16824#0/1 U 3313
AF ILLUMINA-E6F4B9:7:106:11105:11988#0/1 U 3313
AF ILLUMINA-E6F4B9:7:110:6253:8871#0/1 U 3313
AF ILLUMINA-E6F4B9:7:110:10102:16474#0/1 U 3313
AF ILLUMINA-E6F4B9:7:14:9193:6160#0/1 U 3314
AF ILLUMINA-E6F4B9:7:106:7115:7632#0/1 U 3317
AF ILLUMINA-E6F4B9:7:26:17551:3378#0/1 C 3318
AF ILLUMINA-E6F4B9:7:58:5741:1975#0/1 C 3318
AF ILLUMINA-E6F4B9:7:83:6295:2397#0/1 U 3318
AF ILLUMINA-E6F4B9:7:89:7795:10619#0/1 U 3318
AF ILLUMINA-E6F4B9:7:110:7668:5436#0/1 U 3318
AF ILLUMINA-E6F4B9:7:6:12218:12696#0/1 U 3319
AF ILLUMINA-E6F4B9:7:24:19621:17838#0/1 U 3319
AF ILLUMINA-E6F4B9:7:36:1872:3192#0/1 U 3320
AF ILLUMINA-E6F4B9:7:56:2268:8269#0/1 U 3320
AF ILLUMINA-E6F4B9:7:95:8891:20998#0/1 U 3320
AF ILLUMINA-E6F4B9:7:2:5974:19280#0/1 U 3321
AF ILLUMINA-E6F4B9:7:5:14544:13069#0/1 U 3321
AF ILLUMINA-E6F4B9:7:8:16421:8543#0/1 U 3321
AF ILLUMINA-E6F4B9:7:12:3141:13736#0/1 U 3321
AF ILLUMINA-E6F4B9:7:14:12541:17530#0/1 U 3321
AF ILLUMINA-E6F4B9:7:15:14580:10737#0/1 U 3321
AF ILLUMINA-E6F4B9:7:24:16671:3732#0/1 U 3321
AF ILLUMINA-E6F4B9:7:30:9830:10896#0/1 U 3321
AF ILLUMINA-E6F4B9:7:32:17362:18131#0/1 U 3321
AF ILLUMINA-E6F4B9:7:36:3576:13726#0/1 U 3321
AF ILLUMINA-E6F4B9:7:39:1573:14271#0/1 U 3321
AF ILLUMINA-E6F4B9:7:63:15163:14666#0/1 U 3321
AF ILLUMINA-E6F4B9:7:68:5709:16890#0/1 U 3321
AF ILLUMINA-E6F4B9:7:76:19017:9438#0/1 U 3321
AF ILLUMINA-E6F4B9:7:105:5588:10189#0/1 U 3321
AF ILLUMINA-E6F4B9:7:6:18957:11332#0/1 U 3322
AF ILLUMINA-E6F4B9:7:6:7319:13066#0/1 U 3322
AF ILLUMINA-E6F4B9:7:13:9756:16044#0/1 U 3322
AF ILLUMINA-E6F4B9:7:16:4256:15941#0/1 U 3322
AF ILLUMINA-E6F4B9:7:16:16641:17417#0/1 U 3322
AF ILLUMINA-E6F4B9:7:17:4430:9415#0/1 U 3322
AF ILLUMINA-E6F4B9:7:20:8275:3550#0/1 U 3322
AF ILLUMINA-E6F4B9:7:21:5159:15250#0/1 U 3322
AF ILLUMINA-E6F4B9:7:24:6161:10993#0/1 U 3322
AF ILLUMINA-E6F4B9:7:25:17311:20543#0/1 U 3322
AF ILLUMINA-E6F4B9:7:26:15760:18050#0/1 U 3322
AF ILLUMINA-E6F4B9:7:27:18560:8054#0/1 U 3322
AF ILLUMINA-E6F4B9:7:28:5518:1725#0/1 U 3322
AF ILLUMINA-E6F4B9:7:28:18203:16190#0/1 U 3322
AF ILLUMINA-E6F4B9:7:31:15279:2912#0/1 U 3322
AF ILLUMINA-E6F4B9:7:39:17311:9148#0/1 U 3322
AF ILLUMINA-E6F4B9:7:40:18197:4140#0/1 U 3322
AF ILLUMINA-E6F4B9:7:42:1996:14283#0/1 U 3322
AF ILLUMINA-E6F4B9:7:46:18051:1506#0/1 U 3322
AF ILLUMINA-E6F4B9:7:47:19741:9448#0/1 U 3322
AF ILLUMINA-E6F4B9:7:50:3865:11927#0/1 U 3322
AF ILLUMINA-E6F4B9:7:52:2418:16212#0/1 U 3322
AF ILLUMINA-E6F4B9:7:53:6435:10441#0/1 U 3322
AF ILLUMINA-E6F4B9:7:57:13663:9275#0/1 U 3322
AF ILLUMINA-E6F4B9:7:61:9151:5140#0/1 U 3322
AF ILLUMINA-E6F4B9:7:64:6196:4594#0/1 U 3322
AF ILLUMINA-E6F4B9:7:67:7562:11121#0/1 U 3322
AF ILLUMINA-E6F4B9:7:68:16995:17731#0/1 U 3322
AF ILLUMINA-E6F4B9:7:70:17307:11337#0/1 U 3322
AF ILLUMINA-E6F4B9:7:72:14140:14056#0/1 U 3322
AF ILLUMINA-E6F4B9:7:73:18071:19599#0/1 U 3322
AF ILLUMINA-E6F4B9:7:74:10636:15068#0/1 U 3322
AF ILLUMINA-E6F4B9:7:74:13107:15467#0/1 U 3322
AF ILLUMINA-E6F4B9:7:75:7663:13246#0/1 U 3322
AF ILLUMINA-E6F4B9:7:81:9915:2336#0/1 U 3322
AF ILLUMINA-E6F4B9:7:85:10732:2578#0/1 U 3322
AF ILLUMINA-E6F4B9:7:85:16130:11052#0/1 U 3322
AF ILLUMINA-E6F4B9:7:87:5606:3992#0/1 U 3322
AF ILLUMINA-E6F4B9:7:88:13790:15967#0/1 U 3322
AF ILLUMINA-E6F4B9:7:89:16303:14016#0/1 U 3322
AF ILLUMINA-E6F4B9:7:91:18289:8663#0/1 U 3322
AF ILLUMINA-E6F4B9:7:94:18363:18695#0/1 U 3322
AF ILLUMINA-E6F4B9:7:95:16700:7015#0/1 U 3322
AF ILLUMINA-E6F4B9:7:99:18715:5671#0/1 U 3322
AF ILLUMINA-E6F4B9:7:99:3150:9397#0/1 U 3322
AF ILLUMINA-E6F4B9:7:100:14228:11657#0/1 U 3322
AF ILLUMINA-E6F4B9:7:101:15398:2754#0/1 U 3322
AF ILLUMINA-E6F4B9:7:103:4359:15409#0/1 U 3322
AF ILLUMINA-E6F4B9:7:106:2927:10349#0/1 U 3322
AF ILLUMINA-E6F4B9:7:106:5420:11509#0/1 U 3322
AF ILLUMINA-E6F4B9:7:106:12826:12186#0/1 U 3322
AF ILLUMINA-E6F4B9:7:107:7167:8009#0/1 U 3322
AF ILLUMINA-E6F4B9:7:107:5209:16011#0/1 U 3322
AF ILLUMINA-E6F4B9:7:107:12395:16699#0/1 U 3322
AF ILLUMINA-E6F4B9:7:107:18115:17666#0/1 U 3322
AF ILLUMINA-E6F4B9:7:110:1657:4037#0/1 U 3322
AF ILLUMINA-E6F4B9:7:110:7405:20797#0/1 U 3322
AF ILLUMINA-E6F4B9:7:111:15623:17069#0/1 U 3322
AF ILLUMINA-E6F4B9:7:111:18324:20574#0/1 U 3322
AF ILLUMINA-E6F4B9:7:112:17559:6005#0/1 U 3322
AF ILLUMINA-E6F4B9:7:115:4616:20886#0/1 U 3322
AF ILLUMINA-E6F4B9:7:116:4935:10104#0/1 U 3322
AF ILLUMINA-E6F4B9:7:118:18079:8547#0/1 U 3322
AF ILLUMINA-E6F4B9:7:119:11145:3706#0/1 U 3322
AF ILLUMINA-E6F4B9:7:120:10535:18626#0/1 U 3322
AF ILLUMINA-E6F4B9:7:6:17979:15223#0/1 U 3322
AF ILLUMINA-E6F4B9:7:3:6046:10690#0/1 U 3323
AF ILLUMINA-E6F4B9:7:4:5517:9606#0/1 U 3323
AF ILLUMINA-E6F4B9:7:9:10919:14276#0/1 U 3323
AF ILLUMINA-E6F4B9:7:16:4381:7359#0/1 U 3323
AF ILLUMINA-E6F4B9:7:21:15068:4462#0/1 U 3323
AF ILLUMINA-E6F4B9:7:24:6709:20522#0/1 U 3323
AF ILLUMINA-E6F4B9:7:26:12130:8352#0/1 U 3323
AF ILLUMINA-E6F4B9:7:36:16295:10084#0/1 U 3323
AF ILLUMINA-E6F4B9:7:41:16759:15062#0/1 U 3323
AF ILLUMINA-E6F4B9:7:55:19308:19301#0/1 U 3323
AF ILLUMINA-E6F4B9:7:56:9754:17572#0/1 U 3323
AF ILLUMINA-E6F4B9:7:60:15557:19329#0/1 U 3323
AF ILLUMINA-E6F4B9:7:65:15122:15783#0/1 U 3323
AF ILLUMINA-E6F4B9:7:74:4397:16858#0/1 U 3323
AF ILLUMINA-E6F4B9:7:82:7731:15829#0/1 U 3323
AF ILLUMINA-E6F4B9:7:83:7496:1335#0/1 U 3323
AF ILLUMINA-E6F4B9:7:84:6713:11559#0/1 U 3323
AF ILLUMINA-E6F4B9:7:88:14000:10916#0/1 U 3323
AF ILLUMINA-E6F4B9:7:90:7444:10280#0/1 U 3323
AF ILLUMINA-E6F4B9:7:93:19147:12489#0/1 U 3323
AF ILLUMINA-E6F4B9:7:116:15472:3275#0/1 U 3323
AF ILLUMINA-E6F4B9:7:18:6154:11298#0/1 U 3324
AF ILLUMINA-E6F4B9:7:46:15288:15244#0/1 U 3324
AF ILLUMINA-E6F4B9:7:52:19749:12717#0/1 U 3324
AF ILLUMINA-E6F4B9:7:72:14206:18920#0/1 U 3324
AF ILLUMINA-E6F4B9:7:97:7968:1001#0/1 U 3324
AF ILLUMINA-E6F4B9:7:4:15382:8511#0/1 C 3329
AF ILLUMINA-E6F4B9:7:30:15035:4012#0/1 U 3332
AF ILLUMINA-E6F4B9:7:109:8926:17210#0/1 U 3334
AF ILLUMINA-E6F4B9:7:34:12154:9210#0/1 U 3335
AF ILLUMINA-E6F4B9:7:75:5441:5475#0/1 C 3337
AF ILLUMINA-E6F4B9:7:112:15739:10320#0/1 U 3339
AF ILLUMINA-E6F4B9:7:25:17859:7440#0/1 U 3340
AF ILLUMINA-E6F4B9:7:45:15972:3744#0/1 U 3343
AF ILLUMINA-E6F4B9:7:119:3159:11339#0/1 U 3343
AF ILLUMINA-E6F4B9:7:56:18041:9896#0/1 U 3347
AF ILLUMINA-E6F4B9:7:88:2011:4117#0/1 U 3347
AF ILLUMINA-E6F4B9:7:104:4871:14643#0/1 U 3348
AF ILLUMINA-E6F4B9:7:36:9461:12386#0/1 U 3351
AF ILLUMINA-E6F4B9:7:69:15280:7734#0/1 U 3351
AF ILLUMINA-E6F4B9:7:11:2044:14565#0/1 U 3352
AF ILLUMINA-E6F4B9:7:29:14271:16433#0/1 U 3353
AF ILLUMINA-E6F4B9:7:71:7500:3905#0/1 U 3353
AF ILLUMINA-E6F4B9:7:87:2815:14638#0/1 U 3353
AF ILLUMINA-E6F4B9:7:103:19278:10868#0/1 U 3353
AF ILLUMINA-E6F4B9:7:17:12321:20193#0/1 U 3354
AF ILLUMINA-E6F4B9:7:36:8172:6195#0/1 U 3354
AF ILLUMINA-E6F4B9:7:50:8850:14253#0/1 U 3354
AF ILLUMINA-E6F4B9:7:82:14583:21220#0/1 U 3354
AF ILLUMINA-E6F4B9:7:111:3345:1816#0/1 U 3354
AF ILLUMINA-E6F4B9:7:118:5810:20126#0/1 U 3354
AF ILLUMINA-E6F4B9:7:8:5209:14059#0/1 U 3355
AF ILLUMINA-E6F4B9:7:31:7267:14167#0/1 U 3355
AF ILLUMINA-E6F4B9:7:42:12729:7669#0/1 U 3355
AF ILLUMINA-E6F4B9:7:71:17074:19600#0/1 U 3355
AF ILLUMINA-E6F4B9:7:99:18085:14438#0/1 U 3355
AF ILLUMINA-E6F4B9:7:9:15367:5946#0/1 U 3358
AF ILLUMINA-E6F4B9:7:19:3452:10761#0/1 U 3358
AF ILLUMINA-E6F4B9:7:41:17490:1543#0/1 U 3358
AF ILLUMINA-E6F4B9:7:52:2179:11789#0/1 U 3358
AF ILLUMINA-E6F4B9:7:54:2205:14332#0/1 U 3358
AF ILLUMINA-E6F4B9:7:59:16068:9824#0/1 U 3358
AF ILLUMINA-E6F4B9:7:66:7766:8576#0/1 U 3358
AF ILLUMINA-E6F4B9:7:82:2610:7283#0/1 U 3358
AF ILLUMINA-E6F4B9:7:68:11424:5192#0/1 U 3361
AF ILLUMINA-E6F4B9:7:113:3545:16632#0/1 U 3361
AF ILLUMINA-E6F4B9:7:116:3025:2745#0/1 U 3361
AF ILLUMINA-E6F4B9:7:99:2819:5518#0/1 U 3362
AF ILLUMINA-E6F4B9:7:1:11025:3824#0/1 U 3363
AF ILLUMINA-E6F4B9:7:1:5575:4328#0/1 U 3363
AF ILLUMINA-E6F4B9:7:9:14693:7413#0/1 U 3363
AF ILLUMINA-E6F4B9:7:9:14829:11793#0/1 U 3363
AF ILLUMINA-E6F4B9:7:16:5073:15863#0/1 U 3363
AF ILLUMINA-E6F4B9:7:34:14160:18488#0/1 U 3363
AF ILLUMINA-E6F4B9:7:43:7908:15054#0/1 U 3363
AF ILLUMINA-E6F4B9:7:43:12511:15417#0/1 U 3363
AF ILLUMINA-E6F4B9:7:57:4885:8997#0/1 U 3363
AF ILLUMINA-E6F4B9:7:63:13130:11113#0/1 U 3363
AF ILLUMINA-E6F4B9:7:83:7722:17185#0/1 U 3363
AF ILLUMINA-E6F4B9:7:85:17363:21120#0/1 U 3363
AF ILLUMINA-E6F4B9:7:1:15870:17784#0/1 U 3364
AF ILLUMINA-E6F4B9:7:2:1652:4919#0/1 U 3364
AF ILLUMINA-E6F4B9:7:6:18263:5226#0/1 U 3364
AF ILLUMINA-E6F4B9:7:6:12457:9420#0/1 U 3364
AF ILLUMINA-E6F4B9:7:8:11606:11560#0/1 U 3364
AF ILLUMINA-E6F4B9:7:23:19193:12802#0/1 U 3364
AF ILLUMINA-E6F4B9:7:25:17130:15800#0/1 U 3364
AF ILLUMINA-E6F4B9:7:27:15571:17787#0/1 U 3364
AF ILLUMINA-E6F4B9:7:28:12148:9642#0/1 U 3364
AF ILLUMINA-E6F4B9:7:40:10482:21182#0/1 U 3364
AF ILLUMINA-E6F4B9:7:44:3631:16754#0/1 U 3364
AF ILLUMINA-E6F4B9:7:46:2521:16870#0/1 U 3364
AF ILLUMINA-E6F4B9:7:47:10027:12308#0/1 U 3364
AF ILLUMINA-E6F4B9:7:51:11802:12988#0/1 U 3364
AF ILLUMINA-E6F4B9:7:62:1827:19161#0/1 U 3364
AF ILLUMINA-E6F4B9:7:63:17257:8530#0/1 U 3364
AF ILLUMINA-E6F4B9:7:66:1609:14800#0/1 U 3364
AF ILLUMINA-E6F4B9:7:66:19522:16973#0/1 U 3364
AF ILLUMINA-E6F4B9:7:67:11927:18881#0/1 U 3364
AF ILLUMINA-E6F4B9:7:76:6974:5566#0/1 U 3364
AF ILLUMINA-E6F4B9:7:76:5896:20113#0/1 U 3364
AF ILLUMINA-E6F4B9:7:77:6363:1385#0/1 U 3364
AF ILLUMINA-E6F4B9:7:84:13739:11452#0/1 U 3364
AF ILLUMINA-E6F4B9:7:91:3181:19434#0/1 U 3364
AF ILLUMINA-E6F4B9:7:92:13898:10797#0/1 U 3364
AF ILLUMINA-E6F4B9:7:100:13990:16918#0/1 U 3364
AF ILLUMINA-E6F4B9:7:107:16721:7218#0/1 U 3364
AF ILLUMINA-E6F4B9:7:110:17373:10384#0/1 U 3364
AF ILLUMINA-E6F4B9:7:113:14085:11604#0/1 U 3364
AF ILLUMINA-E6F4B9:7:119:10636:3024#0/1 U 3364
AF ILLUMINA-E6F4B9:7:40:9163:21211#0/1 U 3365
AF ILLUMINA-E6F4B9:7:107:15461:14529#0/1 U 3365
AF ILLUMINA-E6F4B9:7:110:11470:10057#0/1 U 3365
AF ILLUMINA-E6F4B9:7:120:11596:11142#0/1 U 3365
AF ILLUMINA-E6F4B9:7:10:14789:15868#0/1 C 3387
AF ILLUMINA-E6F4B9:7:25:18833:17316#0/1 C 3387
AF ILLUMINA-E6F4B9:7:101:14347:4475#0/1 C 3387
AF ILLUMINA-E6F4B9:7:117:13835:14962#0/1 C 3408
AF ILLUMINA-E6F4B9:7:97:9015:13519#0/1 U 3420
AF ILLUMINA-E6F4B9:7:29:16733:19653#0/1 U 3427
AF ILLUMINA-E6F4B9:7:82:8536:9036#0/1 U 3428
AF ILLUMINA-E6F4B9:7:46:1976:19639#0/1 U 3437
AF ILLUMINA-E6F4B9:7:77:16636:12441#0/1 U 3447
AF ILLUMINA-E6F4B9:7:78:11680:12928#0/1 U 3448
AF ILLUMINA-E6F4B9:7:33:5027:5874#0/1 U 3458
AF ILLUMINA-E6F4B9:7:14:16085:5499#0/1 U 3461
AF ILLUMINA-E6F4B9:7:20:18580:8594#0/1 U 3461
AF ILLUMINA-E6F4B9:7:42:8918:2111#0/1 C 3461
AF ILLUMINA-E6F4B9:7:52:11724:2344#0/1 U 3461
AF ILLUMINA-E6F4B9:7:54:5199:2970#0/1 U 3461
AF ILLUMINA-E6F4B9:7:58:9993:6974#0/1 U 3461
AF ILLUMINA-E6F4B9:7:68:9593:2116#0/1 U 3461
AF ILLUMINA-E6F4B9:7:118:18579:12866#0/1 U 3461
AF ILLUMINA-E6F4B9:7:7:9765:7581#0/1 U 3462
AF ILLUMINA-E6F4B9:7:23:14119:10646#0/1 U 3462
AF ILLUMINA-E6F4B9:7:32:14357:11046#0/1 U 3462
AF ILLUMINA-E6F4B9:7:48:16283:12734#0/1 U 3462
AF ILLUMINA-E6F4B9:7:66:11199:12972#0/1 U 3462
AF ILLUMINA-E6F4B9:7:76:13791:13885#0/1 U 3462
AF ILLUMINA-E6F4B9:7:87:3832:3968#0/1 U 3462
AF ILLUMINA-E6F4B9:7:115:1832:11260#0/1 U 3462
AF ILLUMINA-E6F4B9:7:36:2509:13194#0/1 U 3464
AF ILLUMINA-E6F4B9:7:1:9515:9373#0/1 U 3465
AF ILLUMINA-E6F4B9:7:17:4330:1787#0/1 U 3465
AF ILLUMINA-E6F4B9:7:23:5020:7921#0/1 U 3465
AF ILLUMINA-E6F4B9:7:29:18880:5581#0/1 U 3465
AF ILLUMINA-E6F4B9:7:71:17565:19598#0/1 U 3465
AF ILLUMINA-E6F4B9:7:102:5952:12870#0/1 U 3465
AF ILLUMINA-E6F4B9:7:54:7773:5981#0/1 U 3466
AF ILLUMINA-E6F4B9:7:22:9267:9004#0/1 U 3475
AF ILLUMINA-E6F4B9:7:26:5020:8623#0/1 U 3479
AF ILLUMINA-E6F4B9:7:28:1786:7983#0/1 U 3480
AF ILLUMINA-E6F4B9:7:2:9864:20095#0/1 U 3482
AF ILLUMINA-E6F4B9:7:42:12808:21008#0/1 C 3484
AF ILLUMINA-E6F4B9:7:47:14167:19849#0/1 U 3491
AF ILLUMINA-E6F4B9:7:56:6588:7306#0/1 U 3492
AF ILLUMINA-E6F4B9:7:65:9354:7410#0/1 C 3512
AF ILLUMINA-E6F4B9:7:31:1471:13191#0/1 U 3513
AF ILLUMINA-E6F4B9:7:78:12873:17182#0/1 C 3513
AF ILLUMINA-E6F4B9:7:92:14264:18200#0/1 U 3515
AF ILLUMINA-E6F4B9:7:118:8148:16241#0/1 U 3516
AF ILLUMINA-E6F4B9:7:89:4025:18154#0/1 U 3517
AF ILLUMINA-E6F4B9:7:64:13344:11304#0/1 U 3518
AF ILLUMINA-E6F4B9:7:61:18330:6211#0/1 U 3527
AF ILLUMINA-E6F4B9:7:119:5318:17307#0/1 U 3527
AF ILLUMINA-E6F4B9:7:47:15206:8244#0/1 U 3530
AF ILLUMINA-E6F4B9:7:6:17079:12541#0/1 U 3532
AF ILLUMINA-E6F4B9:7:9:5410:16895#0/1 U 3532
AF ILLUMINA-E6F4B9:7:57:18142:10398#0/1 U 3532
AF ILLUMINA-E6F4B9:7:110:9774:6339#0/1 U 3533
AF ILLUMINA-E6F4B9:7:1:6986:2593#0/1 U 3534
AF ILLUMINA-E6F4B9:7:25:14364:1871#0/1 U 3534
AF ILLUMINA-E6F4B9:7:43:11990:9878#0/1 U 3534
AF ILLUMINA-E6F4B9:7:52:9440:16128#0/1 U 3534
AF ILLUMINA-E6F4B9:7:95:3068:9645#0/1 U 3534
AF ILLUMINA-E6F4B9:7:100:14939:5015#0/1 U 3534
AF ILLUMINA-E6F4B9:7:103:15053:20483#0/1 U 3534
AF ILLUMINA-E6F4B9:7:97:19515:14955#0/1 U 3535
AF ILLUMINA-E6F4B9:7:116:10166:19291#0/1 U 3535
AF ILLUMINA-E6F4B9:7:90:12749:8332#0/1 C 3544
AF ILLUMINA-E6F4B9:7:117:9374:9959#0/1 C 3549
AF ILLUMINA-E6F4B9:7:41:15990:16832#0/1 U 3552
AF ILLUMINA-E6F4B9:7:101:13168:8985#0/1 C 3552
AF ILLUMINA-E6F4B9:7:106:16680:11849#0/1 U 3552
AF ILLUMINA-E6F4B9:7:106:6944:13280#0/1 U 3553
AF ILLUMINA-E6F4B9:7:100:13199:9323#0/1 U 3556
AF ILLUMINA-E6F4B9:7:69:8464:3358#0/1 U 3558
AF ILLUMINA-E6F4B9:7:116:18868:5146#0/1 U 3570
AF ILLUMINA-E6F4B9:7:2:18725:20489#0/1 U 3572
AF ILLUMINA-E6F4B9:7:114:13172:11640#0/1 U 3578
AF ILLUMINA-E6F4B9:7:11:13780:10666#0/1 U 3580
AF ILLUMINA-E6F4B9:7:102:4982:4512#0/1 U 3580
AF ILLUMINA-E6F4B9:7:9:1306:3036#0/1 U 3581
AF ILLUMINA-E6F4B9:7:28:4685:21320#0/1 U 3581
AF ILLUMINA-E6F4B9:7:65:6801:7648#0/1 C 3581
AF ILLUMINA-E6F4B9:7:65:3319:4899#0/1 U 3582
AF ILLUMINA-E6F4B9:7:94:17662:4299#0/1 U 3584
AF ILLUMINA-E6F4B9:7:26:2812:12402#0/1 U 3585
AF ILLUMINA-E6F4B9:7:81:5050:14107#0/1 U 3585
AF ILLUMINA-E6F4B9:7:7:1557:6174#0/1 U 3593
AF ILLUMINA-E6F4B9:7:89:17564:13256#0/1 U 3593
AF ILLUMINA-E6F4B9:7:112:19020:1082#0/1 U 3594
AF ILLUMINA-E6F4B9:7:101:3132:7676#0/1 U 3595
AF ILLUMINA-E6F4B9:7:116:13234:13365#0/1 U 3594
AF ILLUMINA-E6F4B9:7:42:13897:15549#0/1 U 3596
AF ILLUMINA-E6F4B9:7:61:10799:2820#0/1 U 3603
AF ILLUMINA-E6F4B9:7:3:9144:7247#0/1 U 3605
AF ILLUMINA-E6F4B9:7:113:2054:15848#0/1 U 3605
AF ILLUMINA-E6F4B9:7:70:4178:3908#0/1 U 3608
AF ILLUMINA-E6F4B9:7:71:13605:1108#0/1 U 3608
AF ILLUMINA-E6F4B9:7:11:19555:7094#0/1 U 3624
AF ILLUMINA-E6F4B9:7:84:9093:9200#0/1 U 3624
AF ILLUMINA-E6F4B9:7:19:5365:18961#0/1 U 3627
AF ILLUMINA-E6F4B9:7:11:2685:3476#0/1 U 3636
AF ILLUMINA-E6F4B9:7:5:4596:8881#0/1 U 3639
AF ILLUMINA-E6F4B9:7:3:4813:4751#0/1 U 3673
AF ILLUMINA-E6F4B9:7:42:3578:14585#0/1 U 3673
AF ILLUMINA-E6F4B9:7:55:6811:17992#0/1 U 3673
AF ILLUMINA-E6F4B9:7:2:10812:13410#0/1 U 3674
AF ILLUMINA-E6F4B9:7:4:8890:19600#0/1 U 3674
AF ILLUMINA-E6F4B9:7:6:16720:13822#0/1 U 3674
AF ILLUMINA-E6F4B9:7:12:4461:1047#0/1 U 3674
AF ILLUMINA-E6F4B9:7:46:7972:13933#0/1 U 3674
AF ILLUMINA-E6F4B9:7:68:15225:12591#0/1 U 3674
AF ILLUMINA-E6F4B9:7:104:14717:13951#0/1 U 3674
AF ILLUMINA-E6F4B9:7:120:4772:11153#0/1 U 3674
AF ILLUMINA-E6F4B9:7:45:1515:16165#0/1 U 3675
AF ILLUMINA-E6F4B9:7:62:14256:16769#0/1 U 3678
AF ILLUMINA-E6F4B9:7:100:18966:1513#0/1 U 3683
AF ILLUMINA-E6F4B9:7:5:11539:10378#0/1 U 3685
AF ILLUMINA-E6F4B9:7:16:14812:3912#0/1 U 3685
AF ILLUMINA-E6F4B9:7:12:5861:6602#0/1 U 3686
AF ILLUMINA-E6F4B9:7:30:8396:4708#0/1 U 3686
AF ILLUMINA-E6F4B9:7:95:17218:2102#0/1 U 3686
AF ILLUMINA-E6F4B9:7:24:17785:6361#0/1 U 3687
AF ILLUMINA-E6F4B9:7:112:4862:1075#0/1 U 3687
AF ILLUMINA-E6F4B9:7:18:6742:20568#0/1 U 3688
AF ILLUMINA-E6F4B9:7:34:19372:11077#0/1 U 3688
AF ILLUMINA-E6F4B9:7:69:3498:8272#0/1 U 3688
AF ILLUMINA-E6F4B9:7:110:16693:6845#0/1 U 3688
AF ILLUMINA-E6F4B9:7:105:12653:11009#0/1 U 3689
AF ILLUMINA-E6F4B9:7:1:17104:10858#0/1 U 3690
AF ILLUMINA-E6F4B9:7:59:6347:16218#0/1 U 3690
AF ILLUMINA-E6F4B9:7:68:12793:13272#0/1 U 3690
AF ILLUMINA-E6F4B9:7:89:13241:5178#0/1 U 3690
AF ILLUMINA-E6F4B9:7:15:12980:1804#0/1 U 3692
AF ILLUMINA-E6F4B9:7:37:4637:12889#0/1 C 3694
AF ILLUMINA-E6F4B9:7:100:19496:15223#0/1 C 3736
AF ILLUMINA-E6F4B9:7:94:12993:7798#0/1 U 3752
AF ILLUMINA-E6F4B9:7:39:13392:18758#0/1 U 3757
AF ILLUMINA-E6F4B9:7:4:5007:20462#0/1 U 3950
AF ILLUMINA-E6F4B9:7:43:13368:3432#0/1 C 3958
AF ILLUMINA-E6F4B9:7:37:16293:12555#0/1 U 3961
AF ILLUMINA-E6F4B9:7:63:8179:15677#0/1 U 3961
AF ILLUMINA-E6F4B9:7:75:6074:9041#0/1 C 3959
AF ILLUMINA-E6F4B9:7:55:16881:4048#0/1 C 3960
AF ILLUMINA-E6F4B9:7:5:4218:16359#0/1 C 3961
AF ILLUMINA-E6F4B9:7:30:5732:19305#0/1 C 3962
AF ILLUMINA-E6F4B9:7:50:5130:21067#0/1 C 3962
AF ILLUMINA-E6F4B9:7:61:17776:3329#0/1 C 3962
AF ILLUMINA-E6F4B9:7:65:18243:17974#0/1 C 3962
AF ILLUMINA-E6F4B9:7:70:2395:5424#0/1 C 3962
AF ILLUMINA-E6F4B9:7:102:12496:4671#0/1 C 3962
AF ILLUMINA-E6F4B9:7:53:5421:14617#0/1 C 3962
AF ILLUMINA-E6F4B9:7:11:7369:17566#0/1 C 3963
AF ILLUMINA-E6F4B9:7:21:8675:4809#0/1 C 3963
AF ILLUMINA-E6F4B9:7:31:9887:10812#0/1 C 3963
AF ILLUMINA-E6F4B9:7:40:2778:11014#0/1 C 3963
AF ILLUMINA-E6F4B9:7:47:3430:16844#0/1 C 3963
AF ILLUMINA-E6F4B9:7:51:18142:2707#0/1 C 3963
AF ILLUMINA-E6F4B9:7:53:8201:14277#0/1 C 3963
AF ILLUMINA-E6F4B9:7:61:12397:14867#0/1 C 3963
AF ILLUMINA-E6F4B9:7:61:15258:16768#0/1 C 3963
AF ILLUMINA-E6F4B9:7:65:15287:16937#0/1 C 3963
AF ILLUMINA-E6F4B9:7:67:1335:19914#0/1 C 3963
AF ILLUMINA-E6F4B9:7:73:19187:17539#0/1 C 3963
AF ILLUMINA-E6F4B9:7:89:14330:9120#0/1 C 3963
AF ILLUMINA-E6F4B9:7:89:15023:20686#0/1 C 3963
AF ILLUMINA-E6F4B9:7:93:12411:8374#0/1 C 3963
AF ILLUMINA-E6F4B9:7:9:13205:7995#0/1 U 3964
AF ILLUMINA-E6F4B9:7:31:2462:8457#0/1 C 3964
AF ILLUMINA-E6F4B9:7:35:3506:7465#0/1 C 3964
AF ILLUMINA-E6F4B9:7:47:7188:5724#0/1 C 3964
AF ILLUMINA-E6F4B9:7:49:12845:12738#0/1 C 3964
AF ILLUMINA-E6F4B9:7:57:9805:20717#0/1 C 3964
AF ILLUMINA-E6F4B9:7:97:14032:18803#0/1 C 3964
AF ILLUMINA-E6F4B9:7:56:19762:18535#0/1 C 3964
AF ILLUMINA-E6F4B9:7:7:12340:4513#0/1 U 3965
AF ILLUMINA-E6F4B9:7:21:13800:9500#0/1 U 3965
AF ILLUMINA-E6F4B9:7:37:17589:6777#0/1 U 3965
AF ILLUMINA-E6F4B9:7:46:3150:4254#0/1 U 3965
AF ILLUMINA-E6F4B9:7:65:2230:12420#0/1 U 3965
AF ILLUMINA-E6F4B9:7:66:19401:15917#0/1 U 3965
AF ILLUMINA-E6F4B9:7:73:15462:8922#0/1 C 3965
AF ILLUMINA-E6F4B9:7:84:1266:15291#0/1 U 3965
AF ILLUMINA-E6F4B9:7:112:5824:11427#0/1 C 3965
AF ILLUMINA-E6F4B9:7:98:1511:11959#0/1 C 3964
AF ILLUMINA-E6F4B9:7:26:17112:9148#0/1 U 3966
AF ILLUMINA-E6F4B9:7:36:11585:12151#0/1 C 3966
AF ILLUMINA-E6F4B9:7:120:10478:17456#0/1 C 3966
AF ILLUMINA-E6F4B9:7:49:5587:17260#0/1 U 3967
AF ILLUMINA-E6F4B9:7:75:14495:11972#0/1 C 3967
AF ILLUMINA-E6F4B9:7:107:14805:8559#0/1 C 3967
AF ILLUMINA-E6F4B9:7:15:16724:9441#0/1 U 3968
AF ILLUMINA-E6F4B9:7:16:8006:10122#0/1 U 3970
AF ILLUMINA-E6F4B9:7:105:15353:10809#0/1 U 3970
AF ILLUMINA-E6F4B9:7:118:4100:17998#0/1 C 3970
AF ILLUMINA-E6F4B9:7:38:2691:2898#0/1 U 3972
AF ILLUMINA-E6F4B9:7:72:17609:7280#0/1 U 3974
AF ILLUMINA-E6F4B9:7:101:2382:2486#0/1 U 3974
AF ILLUMINA-E6F4B9:7:92:14410:3821#0/1 C 3974
AF ILLUMINA-E6F4B9:7:16:8368:12200#0/1 C 3975
AF ILLUMINA-E6F4B9:7:95:3797:5383#0/1 C 3977
AF ILLUMINA-E6F4B9:7:4:6162:5891#0/1 C 3978
AF ILLUMINA-E6F4B9:7:5:9529:12835#0/1 C 3978
AF ILLUMINA-E6F4B9:7:22:7912:18140#0/1 C 3978
AF ILLUMINA-E6F4B9:7:31:4228:14670#0/1 C 3978
AF ILLUMINA-E6F4B9:7:38:10518:13223#0/1 C 3978
AF ILLUMINA-E6F4B9:7:98:19367:6875#0/1 C 3978
AF ILLUMINA-E6F4B9:7:104:6617:13985#0/1 C 3978
AF ILLUMINA-E6F4B9:7:116:8164:15652#0/1 C 3978
AF ILLUMINA-E6F4B9:7:107:9307:16115#0/1 U 3979
AF ILLUMINA-E6F4B9:7:61:15379:16478#0/1 U 3980
AF ILLUMINA-E6F4B9:7:87:16163:8657#0/1 U 3981
AF ILLUMINA-E6F4B9:7:36:12626:16938#0/1 C 3983
AF ILLUMINA-E6F4B9:7:24:12244:8863#0/1 C 3984
AF ILLUMINA-E6F4B9:7:75:2092:10945#0/1 C 3984
AF ILLUMINA-E6F4B9:7:85:12434:15323#0/1 C 3984
AF ILLUMINA-E6F4B9:7:93:1762:13178#0/1 C 3984
AF ILLUMINA-E6F4B9:7:94:11609:18108#0/1 C 3984
AF ILLUMINA-E6F4B9:7:50:11745:20519#0/1 C 3985
AF ILLUMINA-E6F4B9:7:57:6025:18206#0/1 C 3985
AF ILLUMINA-E6F4B9:7:80:8007:12303#0/1 C 3985
AF ILLUMINA-E6F4B9:7:105:3715:1582#0/1 C 3985
AF ILLUMINA-E6F4B9:7:106:12150:13682#0/1 C 3985
AF ILLUMINA-E6F4B9:7:49:4381:17358#0/1 C 3985
AF ILLUMINA-E6F4B9:7:88:17876:10729#0/1 C 3985
AF ILLUMINA-E6F4B9:7:4:3905:15524#0/1 U 3986
AF ILLUMINA-E6F4B9:7:11:12215:19768#0/1 U 3986
AF ILLUMINA-E6F4B9:7:104:19349:12237#0/1 C 3986
AF ILLUMINA-E6F4B9:7:14:8364:19150#0/1 U 3987
AF ILLUMINA-E6F4B9:7:84:9700:12749#0/1 U 3987
AF ILLUMINA-E6F4B9:7:25:14198:4245#0/1 C 3988
AF ILLUMINA-E6F4B9:7:111:15850:19414#0/1 C 3989
AF ILLUMINA-E6F4B9:7:3:19531:13158#0/1 C 3990
AF ILLUMINA-E6F4B9:7:15:16100:14890#0/1 C 3990
AF ILLUMINA-E6F4B9:7:25:15717:21085#0/1 C 3990
AF ILLUMINA-E6F4B9:7:27:18103:7433#0/1 C 3990
AF ILLUMINA-E6F4B9:7:53:13211:13747#0/1 C 3990
AF ILLUMINA-E6F4B9:7:66:19787:18852#0/1 C 3990
AF ILLUMINA-E6F4B9:7:75:11548:17958#0/1 U 3990
AF ILLUMINA-E6F4B9:7:79:1526:20556#0/1 C 3990
AF ILLUMINA-E6F4B9:7:80:4914:2292#0/1 C 3990
AF ILLUMINA-E6F4B9:7:82:7275:11486#0/1 C 3990
AF ILLUMINA-E6F4B9:7:101:4491:1089#0/1 C 3990
AF ILLUMINA-E6F4B9:7:118:4844:4647#0/1 C 3990
AF ILLUMINA-E6F4B9:7:70:12425:5811#0/1 U 3991
AF ILLUMINA-E6F4B9:7:60:4445:6864#0/1 U 3997
AF ILLUMINA-E6F4B9:7:3:4309:3684#0/1 U 3996
AF ILLUMINA-E6F4B9:7:25:17399:5586#0/1 C 3998
AF ILLUMINA-E6F4B9:7:33:13975:19997#0/1 C 3998
AF ILLUMINA-E6F4B9:7:111:7838:19987#0/1 C 3998
AF ILLUMINA-E6F4B9:7:114:1922:7297#0/1 C 3998
AF ILLUMINA-E6F4B9:7:27:9949:20857#0/1 U 3999
AF ILLUMINA-E6F4B9:7:42:15741:10218#0/1 U 3999
AF ILLUMINA-E6F4B9:7:82:16539:7837#0/1 U 3999
AF ILLUMINA-E6F4B9:7:21:7065:11573#0/1 U 4000
AF ILLUMINA-E6F4B9:7:91:8859:18953#0/1 U 4000
AF ILLUMINA-E6F4B9:7:92:12794:11799#0/1 U 4000
AF ILLUMINA-E6F4B9:7:110:17813:7051#0/1 U 4000
AF ILLUMINA-E6F4B9:7:4:4758:7683#0/1 U 4001
AF ILLUMINA-E6F4B9:7:21:17933:13328#0/1 U 4001
AF ILLUMINA-E6F4B9:7:25:3149:12928#0/1 U 4001
AF ILLUMINA-E6F4B9:7:77:19360:3308#0/1 U 4001
AF ILLUMINA-E6F4B9:7:81:1220:17977#0/1 U 4001
AF ILLUMINA-E6F4B9:7:82:15868:13413#0/1 U 4001
AF ILLUMINA-E6F4B9:7:45:12495:16459#0/1 U 4002
AF ILLUMINA-E6F4B9:7:72:15768:14827#0/1 U 4003
AF ILLUMINA-E6F4B9:7:89:11611:18432#0/1 U 4003
AF ILLUMINA-E6F4B9:7:108:11415:19876#0/1 U 4003
AF ILLUMINA-E6F4B9:7:85:15727:10230#0/1 U 4004
AF ILLUMINA-E6F4B9:7:98:19488:15385#0/1 U 4006
AF ILLUMINA-E6F4B9:7:105:17762:20441#0/1 U 4006
AF ILLUMINA-E6F4B9:7:48:13506:10645#0/1 U 4007
AF ILLUMINA-E6F4B9:7:24:19194:8177#0/1 U 4008
AF ILLUMINA-E6F4B9:7:98:18643:12073#0/1 U 4008
AF ILLUMINA-E6F4B9:7:29:18289:1087#0/1 U 4010
AF ILLUMINA-E6F4B9:7:21:16813:16050#0/1 C 4010
AF ILLUMINA-E6F4B9:7:19:4890:20834#0/1 U 4011
AF ILLUMINA-E6F4B9:7:26:17922:19161#0/1 C 4011
AF ILLUMINA-E6F4B9:7:39:12424:9979#0/1 U 4011
AF ILLUMINA-E6F4B9:7:50:15948:12271#0/1 U 4011
AF ILLUMINA-E6F4B9:7:57:17465:1837#0/1 C 4011
AF ILLUMINA-E6F4B9:7:61:17256:16608#0/1 U 4011
AF ILLUMINA-E6F4B9:7:108:8808:14071#0/1 C 4011
AF ILLUMINA-E6F4B9:7:109:19126:15742#0/1 U 4011
AF ILLUMINA-E6F4B9:7:11:3882:11063#0/1 C 4011
AF ILLUMINA-E6F4B9:7:13:15842:12911#0/1 U 4014
AF ILLUMINA-E6F4B9:7:82:2425:18777#0/1 U 4014
AF ILLUMINA-E6F4B9:7:64:14036:1939#0/1 C 4017
AF ILLUMINA-E6F4B9:7:2:4153:6075#0/1 C 4018
AF ILLUMINA-E6F4B9:7:3:9293:7189#0/1 C 4018
AF ILLUMINA-E6F4B9:7:8:9578:13580#0/1 C 4018
AF ILLUMINA-E6F4B9:7:27:14506:4765#0/1 C 4018
AF ILLUMINA-E6F4B9:7:46:9036:16932#0/1 C 4018
AF ILLUMINA-E6F4B9:7:82:8671:8170#0/1 C 4018
AF ILLUMINA-E6F4B9:7:92:17457:5841#0/1 C 4018
AF ILLUMINA-E6F4B9:7:93:10348:8746#0/1 C 4018
AF ILLUMINA-E6F4B9:7:96:2035:12318#0/1 C 4018
AF ILLUMINA-E6F4B9:7:98:9835:1372#0/1 C 4018
AF ILLUMINA-E6F4B9:7:68:9097:17738#0/1 C 4019
AF ILLUMINA-E6F4B9:7:82:2420:11501#0/1 C 4019
AF ILLUMINA-E6F4B9:7:48:5033:2233#0/1 C 4020
AF ILLUMINA-E6F4B9:7:90:10696:11976#0/1 C 4020
AF ILLUMINA-E6F4B9:7:38:14816:4784#0/1 C 4021
AF ILLUMINA-E6F4B9:7:33:4727:5207#0/1 C 4023
AF ILLUMINA-E6F4B9:7:102:6135:4905#0/1 C 4024
AF ILLUMINA-E6F4B9:7:17:9349:12049#0/1 C 4025
AF ILLUMINA-E6F4B9:7:41:3779:5401#0/1 C 4026
AF ILLUMINA-E6F4B9:7:68:10869:17573#0/1 C 4026
AF ILLUMINA-E6F4B9:7:64:3883:5965#0/1 U 4030
AF ILLUMINA-E6F4B9:7:15:15504:16982#0/1 U 4067
AF ILLUMINA-E6F4B9:7:42:2823:7943#0/1 U 4067
AF ILLUMINA-E6F4B9:7:68:4363:11353#0/1 U 4067
AF ILLUMINA-E6F4B9:7:5:11687:1865#0/1 U 4070
AF ILLUMINA-E6F4B9:7:13:6446:6615#0/1 U 4070
AF ILLUMINA-E6F4B9:7:16:6131:3682#0/1 U 4070
AF ILLUMINA-E6F4B9:7:16:14610:15507#0/1 U 4070
AF ILLUMINA-E6F4B9:7:33:3002:18420#0/1 U 4070
AF ILLUMINA-E6F4B9:7:45:1420:12621#0/1 U 4070
AF ILLUMINA-E6F4B9:7:64:3633:15918#0/1 U 4070
AF ILLUMINA-E6F4B9:7:88:9745:9259#0/1 U 4070
AF ILLUMINA-E6F4B9:7:108:17929:5453#0/1 U 4070
AF ILLUMINA-E6F4B9:7:109:3494:15091#0/1 U 4070
AF ILLUMINA-E6F4B9:7:78:14824:6711#0/1 U 4071
AF ILLUMINA-E6F4B9:7:107:8042:11700#0/1 U 4070
AF ILLUMINA-E6F4B9:7:97:5809:6261#0/1 U 4073
AF ILLUMINA-E6F4B9:7:77:5477:5977#0/1 U 4074
AF ILLUMINA-E6F4B9:7:77:14986:20779#0/1 U 4074
AF ILLUMINA-E6F4B9:7:7:14430:14644#0/1 C 4069
AF ILLUMINA-E6F4B9:7:109:4024:9428#0/1 U 4075
AF ILLUMINA-E6F4B9:7:46:12475:7268#0/1 U 4076
AF ILLUMINA-E6F4B9:7:2:15929:15132#0/1 U 4077
AF ILLUMINA-E6F4B9:7:7:10472:6604#0/1 U 4077
AF ILLUMINA-E6F4B9:7:30:5736:14066#0/1 U 4077
AF ILLUMINA-E6F4B9:7:72:6920:6760#0/1 U 4077
AF ILLUMINA-E6F4B9:7:75:12992:8871#0/1 U 4077
AF ILLUMINA-E6F4B9:7:102:7179:12592#0/1 U 4077
AF ILLUMINA-E6F4B9:7:11:4048:7917#0/1 U 4078
AF ILLUMINA-E6F4B9:7:59:3941:1733#0/1 U 4079
AF ILLUMINA-E6F4B9:7:102:18388:19451#0/1 C 4079
AF ILLUMINA-E6F4B9:7:108:6069:19549#0/1 C 4079
AF ILLUMINA-E6F4B9:7:27:5817:18147#0/1 U 4080
AF ILLUMINA-E6F4B9:7:61:3150:8240#0/1 U 4080
AF ILLUMINA-E6F4B9:7:13:5278:20236#0/1 C 4081
AF ILLUMINA-E6F4B9:7:52:13957:1810#0/1 C 4082
AF ILLUMINA-E6F4B9:7:5:5956:6568#0/1 C 4084
AF ILLUMINA-E6F4B9:7:13:10323:1132#0/1 C 4084
AF ILLUMINA-E6F4B9:7:37:17429:9425#0/1 C 4084
AF ILLUMINA-E6F4B9:7:108:4551:14110#0/1 C 4084
AF ILLUMINA-E6F4B9:7:116:16841:20706#0/1 C 4084
AF ILLUMINA-E6F4B9:7:2:4180:20286#0/1 C 4086
AF ILLUMINA-E6F4B9:7:19:13617:17225#0/1 C 4087
AF ILLUMINA-E6F4B9:7:20:9801:2353#0/1 C 4087
AF ILLUMINA-E6F4B9:7:117:13466:15325#0/1 C 4087
AF ILLUMINA-E6F4B9:7:16:4650:5329#0/1 C 4088
AF ILLUMINA-E6F4B9:7:72:2478:2943#0/1 C 4088
AF ILLUMINA-E6F4B9:7:59:3116:18883#0/1 C 4088
AF ILLUMINA-E6F4B9:7:30:7526:10956#0/1 C 4089
AF ILLUMINA-E6F4B9:7:75:10663:17638#0/1 C 4089
AF ILLUMINA-E6F4B9:7:116:10691:10799#0/1 U 4089
AF ILLUMINA-E6F4B9:7:27:9001:4363#0/1 C 4090
AF ILLUMINA-E6F4B9:7:80:1080:10951#0/1 C 4091
AF ILLUMINA-E6F4B9:7:117:15146:5000#0/1 C 4091
AF ILLUMINA-E6F4B9:7:62:17999:9637#0/1 C 4093
AF ILLUMINA-E6F4B9:7:44:19086:7651#0/1 C 4092
AF ILLUMINA-E6F4B9:7:84:9334:17814#0/1 C 4092
AF ILLUMINA-E6F4B9:7:110:13846:12794#0/1 C 4092
AF ILLUMINA-E6F4B9:7:14:17123:20492#0/1 C 4094
AF ILLUMINA-E6F4B9:7:26:17458:14363#0/1 C 4094
AF ILLUMINA-E6F4B9:7:32:19248:3307#0/1 C 4094
AF ILLUMINA-E6F4B9:7:38:17869:13393#0/1 C 4094
AF ILLUMINA-E6F4B9:7:43:14774:6010#0/1 C 4094
AF ILLUMINA-E6F4B9:7:46:17013:17209#0/1 C 4094
AF ILLUMINA-E6F4B9:7:69:17188:6521#0/1 C 4094
AF ILLUMINA-E6F4B9:7:70:7351:3242#0/1 C 4094
AF ILLUMINA-E6F4B9:7:74:14788:20042#0/1 C 4094
AF ILLUMINA-E6F4B9:7:77:14196:17245#0/1 C 4094
AF ILLUMINA-E6F4B9:7:85:16822:2114#0/1 C 4094
AF ILLUMINA-E6F4B9:7:89:4306:2267#0/1 C 4094
AF ILLUMINA-E6F4B9:7:92:15427:2368#0/1 C 4094
AF ILLUMINA-E6F4B9:7:112:15318:17854#0/1 C 4094
AF ILLUMINA-E6F4B9:7:119:6308:1504#0/1 C 4094
AF ILLUMINA-E6F4B9:7:65:16576:6517#0/1 C 4094
AF ILLUMINA-E6F4B9:7:8:1314:20545#0/1 C 4095
AF ILLUMINA-E6F4B9:7:70:4197:6969#0/1 C 4095
AF ILLUMINA-E6F4B9:7:7:6618:20044#0/1 C 4096
AF ILLUMINA-E6F4B9:7:41:10784:7515#0/1 C 4096
AF ILLUMINA-E6F4B9:7:69:10565:21067#0/1 C 4096
AF ILLUMINA-E6F4B9:7:73:4116:20903#0/1 C 4096
AF ILLUMINA-E6F4B9:7:103:8055:20942#0/1 C 4096
AF ILLUMINA-E6F4B9:7:66:3228:5954#0/1 U 4094
AF ILLUMINA-E6F4B9:7:1:2612:12951#0/1 U 4097
AF ILLUMINA-E6F4B9:7:24:1341:2591#0/1 U 4097
AF ILLUMINA-E6F4B9:7:63:9080:5212#0/1 U 4097
AF ILLUMINA-E6F4B9:7:63:1120:12937#0/1 U 4097
AF ILLUMINA-E6F4B9:7:70:16786:15407#0/1 U 4097
AF ILLUMINA-E6F4B9:7:75:13285:5282#0/1 U 4097
AF ILLUMINA-E6F4B9:7:77:15170:6879#0/1 U 4097
AF ILLUMINA-E6F4B9:7:79:7430:16498#0/1 U 4097
AF ILLUMINA-E6F4B9:7:93:1926:5540#0/1 U 4097
AF ILLUMINA-E6F4B9:7:110:5051:6963#0/1 U 4097
AF ILLUMINA-E6F4B9:7:7:7555:17295#0/1 C 4098
AF ILLUMINA-E6F4B9:7:34:18244:5547#0/1 C 4098
AF ILLUMINA-E6F4B9:7:81:4448:19343#0/1 C 4099
AF ILLUMINA-E6F4B9:7:60:4218:6597#0/1 C 4100
AF ILLUMINA-E6F4B9:7:62:3218:20850#0/1 C 4100
AF ILLUMINA-E6F4B9:7:81:10755:18554#0/1 C 4100
AF ILLUMINA-E6F4B9:7:93:12733:2709#0/1 C 4100
AF ILLUMINA-E6F4B9:7:53:12106:4195#0/1 U 4102
AF ILLUMINA-E6F4B9:7:55:11582:8124#0/1 U 4103
AF ILLUMINA-E6F4B9:7:5:8837:19794#0/1 U 4105
AF ILLUMINA-E6F4B9:7:24:9659:18720#0/1 U 4105
AF ILLUMINA-E6F4B9:7:30:1469:18816#0/1 U 4105
AF ILLUMINA-E6F4B9:7:36:4586:18331#0/1 U 4105
AF ILLUMINA-E6F4B9:7:45:2407:15507#0/1 C 4105
AF ILLUMINA-E6F4B9:7:58:10599:13668#0/1 U 4105
AF ILLUMINA-E6F4B9:7:79:17213:11986#0/1 U 4105
AF ILLUMINA-E6F4B9:7:81:14809:13769#0/1 U 4105
AF ILLUMINA-E6F4B9:7:95:13165:18507#0/1 U 4105
AF ILLUMINA-E6F4B9:7:100:16109:14923#0/1 U 4105
AF ILLUMINA-E6F4B9:7:104:5380:12562#0/1 U 4105
AF ILLUMINA-E6F4B9:7:107:2486:1806#0/1 U 4105
AF ILLUMINA-E6F4B9:7:6:14027:5889#0/1 U 4106
AF ILLUMINA-E6F4B9:7:49:19641:11155#0/1 U 4106
AF ILLUMINA-E6F4B9:7:52:19280:2497#0/1 U 4107
AF ILLUMINA-E6F4B9:7:79:19076:5326#0/1 C 4107
AF ILLUMINA-E6F4B9:7:100:1323:7537#0/1 U 4107
AF ILLUMINA-E6F4B9:7:66:6840:5248#0/1 U 4108
AF ILLUMINA-E6F4B9:7:21:18636:18320#0/1 U 4109
AF ILLUMINA-E6F4B9:7:1:8299:7776#0/1 U 4110
AF ILLUMINA-E6F4B9:7:17:6418:10392#0/1 U 4110
AF ILLUMINA-E6F4B9:7:75:19542:10217#0/1 U 4110
AF ILLUMINA-E6F4B9:7:111:15207:20810#0/1 U 4110
AF ILLUMINA-E6F4B9:7:97:11114:6737#0/1 U 4108
AF ILLUMINA-E6F4B9:7:10:6209:9817#0/1 U 4111
AF ILLUMINA-E6F4B9:7:26:17526:12713#0/1 U 4111
AF ILLUMINA-E6F4B9:7:96:14866:1548#0/1 U 4111
AF ILLUMINA-E6F4B9:7:25:3686:6713#0/1 U 4112
AF ILLUMINA-E6F4B9:7:74:5982:3921#0/1 U 4112
AF ILLUMINA-E6F4B9:7:103:17662:13138#0/1 C 4113
AF ILLUMINA-E6F4B9:7:42:5400:13371#0/1 C 4114
AF ILLUMINA-E6F4B9:7:86:13778:14505#0/1 C 4116
AF ILLUMINA-E6F4B9:7:43:6755:17102#0/1 U 4117
AF ILLUMINA-E6F4B9:7:61:3548:20717#0/1 U 4117
AF ILLUMINA-E6F4B9:7:64:3301:7488#0/1 U 4117
AF ILLUMINA-E6F4B9:7:72:12627:10523#0/1 U 4117
AF ILLUMINA-E6F4B9:7:75:2422:17238#0/1 U 4117
AF ILLUMINA-E6F4B9:7:83:16833:4213#0/1 U 4118
BS 1 4139 NC_011317_pseudo

RD NC_011317_pseudo 4139 0 0
AGTATTATTCCGTGATACGGATACTGTAAGATACAGATGTAATACATCGTTTCTAATAGA
AACTGTATCTTACAGTATCCGTATCACGGAATAATACTTTTTATATGGATTATGGACTTA
TATCAAATTCCTATATGGATCACTGGAGGTGGAAAATAAGAGAAAAACATAAGGTGGAAA
TTAAGCTTATTCTCCACACACAAATACAACCTTAATTTCCACTACCACATGGTCCACCCC
TATGGATCACTGGAGGTGGAAAATAAGAAAAAAACATAAGGTGGAAATTAAGCTTATTCT
CCACACACAAATACAACCTTAATTTCCACTACCACATGGTCCACCCCTATATAAGGAGTA
CAAAAGGAGAGGCGAATTGAGTGATGAATTCAGTCTGCGATGAACATTCGCCGTGTGAAC
ACGGAAACTTATATTGTGAGTGCATATACTGTTGGGAACATGACGGACAGTGCAGGGGGA
AAAAACTGGATTTGGGAGAATCAACTGGAATCGAAGGAAGATTGGCCAACGATAACCAAC
AACCAGGGCTCTCAGATTCATATTGCACCGAGACAATACATCTTGCAACTGCAGTTCAAC
CGGAAAGGAGAGTCATCGATCGAGAAGATTACGTCAAGAATTTCGCTGGTCAAACCGTTG
GTGACCTCTACCCACAATTACAAGGCAGCACCGGAGCCTCTGAACCAATTGATTTCGCAT
TTCCAACTGTTGGCTCAGGAAGCTGGGAAATACTTGTACGTGAATCTCACAAACATTTCG
AGCCAAATAATTCGGAAGAAGCTTATCAATCACATATTAGAAGTGTACGAAGACGATTAT
TCCCCGAAGAAACTATGGATAATAACGGGTCACAGGCAAGCACGACCGAAATGTTACGAA
ACGCTGTCGAAAGATGCGGTTTTGAAGGCCCTCCTAACAGCCCAAGCGAAAATAACAGAG
ATGGAGTTGATGGAACGTGTATATCAACCGTGGAATTACACAGCAATTGTATTGTTAACG
CACATTGCCCAAAACAAGGACCAAGCAATCAAACCAATAAGAGAAAGAAATCAACCGATA
CAACAGAATCAAGCGGATCCAAAAAAAATAAAAGCAGCAATAATCAACAAAATATACAAG
AACAAGGCAGTTCCAGCATCACCGACAATATCGATCTCGTCGACGGAGAGTTGGATGGAT
CAATTGGATCGAATCGAGAAACAGCATACTACACATTCGTCCTCCACAAAGACAACGTTA
AAGAGGACTGGAGATACATCGCCACAACCAGGGCCAAGCAAGCGCCGAGTTTCATCACAT
TCGATCACGGAGACCACATCCATATCCTCTTCTCCTCGTCCAATACAGGAGGAAACAGCA
CAAGAGTCAGAACCAGAATCACCAAGTTTCTTAGTGCGACAAGCGCAGGAAGTGCAGAAG
CGACTATCACTTTTTCCAAAGTTAAATTTCTCAGGAACTTCATTCTCTATTGCATCCGTT
ACGGTATCGAAACAGTCAATATCTATGGAAATAAAATCCAACAACAATTAACCGAAGCAA
TGGATACATTTAAAATATTATTTGAAAATAGAGACCCAAATGACGTAATATTAGAAGCCG
GATGCAAACTATATCATGAAGAAAAAAAGGATAATAAACAAAAAAGATGCGGACAACGTA
AACAACAAAATCTAACGGAAATTATATTGGAAAAAATTAAAGAAAAGAAAATAACAACGG
CACAGCAATGGGAAAATCAAATTGAACCTGAATTCAAAATACAATTAATAAAAGAGTTTG
GATTAAATGTAGACAGTTATGTAACAAGAATAGTACGCATCGAGAGGACACGTATACAAC
AGTTGATAAAAGCAAAAACGCTTACGGAAATAATGCTTGAAACATTAAATGATGACTATA
TTAAACACTTCACACCAGGAGAAGACAACAGTAAAACAACAAAATGTATTGAATGGATAG
AATATCTATTCAAAGAAAATAACATTAATATAATCCACTTCTTGGCATGGAATGAAATTA
TAAAAACAAAAAGGTATAAAAAAATAAATGGAATGGTACTAGAGGGCATCACAAATGCAG
GAAAATCACTAATATTGGATAACTTATTGGCCATGGTAAAACCAGAAGAAATACCACGAG
AACGAGACAACAGTGGATTCCACCTTGACCAAGTACCAGGAGCAGGATCGATCCTATTTG
AAGAACCAATGATCACACCAGTAAACGTCGGAACATGGAAATTATTACTAGAAGGAAAAA
CCATAAAAACAGATGTGAAAAATAAAGACAAAGAGCCGATAGAACGCACACCAACGTGGA
TCACAACAGCAACTCCAATTACAAATAACATTGATATGAATGAGACATCACAAATACTAC
AAAGAATAAAATTATATATATTCAAAAAAAGTATCCAACACAGAGACGACAAATATACTA
TAAATGCGCAAATTCAAAATAAATTGATCAGTCGTCCTCCAACTCTCATTGAGCCAATAC
ATATGGCCATAGTGTTTATAAAAAATTTCACAAAAATATATAATCTAATCGCAGAAGAAG
ACAAGGCACACACAGTGAATGAAAAGGCAATACAAATAAGCAACGAAGTGAAAGAAGAAG
CAGAATTATGGCAGACAGCACTTCAATGGACCATGATGGAGAACAACGAGGAACAAAACG
AAAACGAGGCGCAGAAGGATCAGGTGCAGGAATCGGAAAAGGAAATAGCAACTCCGTAAA
AGAAGGATATGGACCAAATATGACCGAAATGATCCCAAGAAATATTATGAACAAAGGAAA
TCATACGGTACTTCATACAGTAAAGCAGCAAAAATACTTGGACTTCAATTTCGTATCGAA
TCAAAACCCATACATTATACCATATCAAACGGCAGGATTCTGGGCATCAATGTGGGACCA
AGGAGAAATCGAATCAAACAACACCATCAATATCATGAAAGCACTAAATAGAGTAGCTCT
TGGAGTAACATGGATCAAAGGAGAAATCACATTCGAAGTATATTCAGTAACCAGACAACG
CTTGCTAACGGGAACGACAAACCAAACTACATGGGACTTTGAAACAAGTCAAAACATGTT
CATCGCAGACGCAGACAGAGAACCAGAAAACTTCGGATTAACATCAGCAGCAGCAACTGG
TCCACTTGCTCAACAAACAACACAAACACTACTATTCAACAAAAACAACGACAGATACAC
AAAATATGAATTACCACAAAGAAATCAATATACAAGGGAAATCAACTTCCAAAAACTAAC
AAACAACTATATGTGGAGACCAACGGACATCAACGAAGAAGCAAACTTTAGAAGACTGAT
CCCAATGTCGGAAGGAGTATATACATCATCAAACGCAAATAGTAAAGCGTCAGAATTAAC
ACAACAAAATTCAGCATGGGCTACATCAGGAAAAACAACACAAGGAACACTATTCAGAAA
TAGAACATCATATCCAAGAATGCATGTAGCACAACCACAAGTTCCAGATGAAACCGGATA
CATGAAGTTCAGATACCAAGTACGAATGAGCACAAAATTATACCTAGAATTTCATCTCTA
CCCAGATTATGGATCATCAACAAACATGGAATATATGCAAAGACAAGTACTGGAATTACC
AGAAGTCACTGCAAGAGGAGGAGTAGTAACATGTATGCCGTATGAAATCAAAACTTAAAT
ATTTTAATCAACATGTATCAACTATAACACATATATAATCAATAAAGCATTCAAAAAAGT
ATACAAGTCCAAGTCCAATTAATATATATCACAATAAAAATCCACATTAAAATATAAGCT
TAATTTCCACCTCCGTAGTCCACCTCAGAATATTGGCTTAATTTCCACCTCCGTAGTCCA
CCTCAGAATATTGGCTTAAATTCCACCTCCGATGATACAGTTAAGAAGCCAACATTAGTC
CGGGATCCCCGTGTGAGCCGATAGGCGAGGATCGAAAGCCCAAATTTTGCTGACGTCACC
TCACACACATACCAAAAGCTTTAGTTTCTAATAGAAACAGCGTATTACGCTTAAAGCTTT
TGGTATGTGTGTGAGGTGACGTCAGCAAAATTTGGGCTTTCGATCCTCGCCTATCGGCT

QA 1 4139 1 4139
DS VERSION: 1 TIME: Tue Jun 14 09:07:44 2011

RD ILLUMINA-E6F4B9:7:5:12408:9546#0/1 24 0 0
TTTCGTGATACGGATACTGTAAGA

QA 1 24 4 24
DS VERSION: 1 TIME: Tue Jun 14 09:07:44 2011

RD ILLUMINA-E6F4B9:7:24:19465:19643#0/1 22 0 0
TTCGTGATACGGATACTGTAAG

QA 1 22 3 22
DS VERSION: 1 TIME: Tue Jun 14 09:07:44 2011

RD ILLUMINA-E6F4B9:7:9:9867:6127#0/1 22 0 0
TCGTGATACGGATACTGTAAGA

QA 1 22 2 22
DS VERSION: 1 TIME: Tue Jun 14 09:07:44 2011

RD ILLUMINA-E6F4B9:7:71:3414:2818#0/1 22 0 0
TCGTGATACGGATACTGTAAGA

QA 1 22 2 22
DS VERSION: 1 TIME: Tue Jun 14 09:07:44 2011

RD ILLUMINA-E6F4B9:7:73:4752:1265#0/1 21 0 0
TCGTGATACGGATACTGTAAG

QA 1 21 2 21
DS VERSION: 1 TIME: Tue Jun 14 09:07:44 2011

RD ILLUMINA-E6F4B9:7:93:13447:1428#0/1 24 0 0
TCGTGATACGGATACTGTAAGATA

QA 1 24 2 24
DS VERSION: 1 TIME: Tue Jun 14 09:07:44 2011

RD ILLUMINA-E6F4B9:7:22:18632:5104#0/1 21 0 0
CGTGATACGGATACTGTAAGA

QA 1 21 1 21
DS VERSION: 1 TIME: Tue Jun 14 09:07:44 2011

RD ILLUMINA-E6F4B9:7:31:9935:7484#0/1 21 0 0
CGTGATACGGATACTGTAAGA

QA 1 21 1 21
DS VERSION: 1 TIME: Tue Jun 14 09:07:44 2011

RD ILLUMINA-E6F4B9:7:40:3179:3636#0/1 22 0 0
CGTGATACGGATACTGTAAGAT

QA 1 22 1 22
DS VERSION: 1 TIME: Tue Jun 14 09:07:44 2011

RD ILLUMINA-E6F4B9:7:69:14561:5507#0/1 22 0 0
CGTGATACGGATACTGTAAGAT

QA 1 22 1 22
DS VERSION: 1 TIME: Tue Jun 14 09:07:44 2011

RD ILLUMINA-E6F4B9:7:72:19551:17593#0/1 21 0 0
CGTGATACGGATACTGTAAGA

QA 1 21 1 21
DS VERSION: 1 TIME: Tue Jun 14 09:07:44 2011

RD ILLUMINA-E6F4B9:7:99:7845:11182#0/1 22 0 0
CGTGATACGGATACTGTAAGAT

QA 1 22 1 22
DS VERSION: 1 TIME: Tue Jun 14 09:07:44 2011

RD ILLUMINA-E6F4B9:7:112:12121:18969#0/1 21 0 0
CGTGATACGGATACTGTAAGA

QA 1 21 1 21
DS VERSION: 1 TIME: Tue Jun 14 09:07:44 2011

RD ILLUMINA-E6F4B9:7:62:19306:4933#0/1 22 0 0
GTGATACGGATACTGTAAGATA

QA 1 22 1 22
DS VERSION: 1 TIME: Tue Jun 14 09:07:44 2011

RD ILLUMINA-E6F4B9:7:65:11484:18462#0/1 21 0 0
GTGATACGGATACTGTAAGAT

QA 1 21 1 21
DS VERSION: 1 TIME: Tue Jun 14 09:07:44 2011

RD ILLUMINA-E6F4B9:7:68:2815:14306#0/1 21 0 0
GTGATACGGATACTGTAAGAT

QA 1 21 1 21
DS VERSION: 1 TIME: Tue Jun 14 09:07:44 2011

RD ILLUMINA-E6F4B9:7:74:4779:8321#0/1 22 0 0
GTGATACGGATACTGTAAGATA

QA 1 22 1 22
DS VERSION: 1 TIME: Tue Jun 14 09:07:44 2011

RD ILLUMINA-E6F4B9:7:76:16791:14654#0/1 21 0 0
GTGATACGGATACTGTAAGAT

QA 1 21 1 21
DS VERSION: 1 TIME: Tue Jun 14 09:07:44 2011

RD ILLUMINA-E6F4B9:7:80:14645:17191#0/1 21 0 0
GTGATACGGATACTGTAAGAT

QA 1 21 1 21
DS VERSION: 1 TIME: Tue Jun 14 09:07:44 2011

RD ILLUMINA-E6F4B9:7:85:12063:15162#0/1 22 0 0
GTGATACGGATACTGTAAGATA

QA 1 22 1 22
DS VERSION: 1 TIME: Tue Jun 14 09:07:44 2011

RD ILLUMINA-E6F4B9:7:95:1682:5073#0/1 22 0 0
GTGATACGGATACTGTAAGATA

QA 1 22 1 22
DS VERSION: 1 TIME: Tue Jun 14 09:07:44 2011

RD ILLUMINA-E6F4B9:7:3:18178:20724#0/1 23 0 0
TGATACGGATACTGTAAGATACT

QA 1 23 1 22
DS VERSION: 1 TIME: Tue Jun 14 09:07:44 2011

RD ILLUMINA-E6F4B9:7:8:14571:15063#0/1 21 0 0
TGATACGGATACTGTAAGATA

QA 1 21 1 21
DS VERSION: 1 TIME: Tue Jun 14 09:07:44 2011

RD ILLUMINA-E6F4B9:7:18:1456:13423#0/1 22 0 0
TGATACGGATACTGTAAGATAC

QA 1 22 1 22
DS VERSION: 1 TIME: Tue Jun 14 09:07:44 2011

RD ILLUMINA-E6F4B9:7:19:6950:2488#0/1 21 0 0
TGATACGGATACTGTAAGATA

QA 1 21 1 21
DS VERSION: 1 TIME: Tue Jun 14 09:07:44 2011

RD ILLUMINA-E6F4B9:7:24:17190:2742#0/1 19 0 0
TGATACGGATACTGTAAGA

QA 1 19 1 19
DS VERSION: 1 TIME: Tue Jun 14 09:07:44 2011

RD ILLUMINA-E6F4B9:7:26:7833:1166#0/1 25 0 0
TGATACGGATACTGTAAGATACTCG

QA 1 25 1 22
DS VERSION: 1 TIME: Tue Jun 14 09:07:44 2011

RD ILLUMINA-E6F4B9:7:31:8098:1109#0/1 22 0 0
TGATACGGATACTGTAAGATAC

QA 1 22 1 22
DS VERSION: 1 TIME: Tue Jun 14 09:07:44 2011

RD ILLUMINA-E6F4B9:7:39:17942:16693#0/1 20 0 0
TGATACGGATACTGTAAGAT

QA 1 20 1 20
DS VERSION: 1 TIME: Tue Jun 14 09:07:44 2011

RD ILLUMINA-E6F4B9:7:40:5751:9251#0/1 21 0 0
TGATACGGATACTGTAAGATA

QA 1 21 1 21
DS VERSION: 1 TIME: Tue Jun 14 09:07:44 2011

RD ILLUMINA-E6F4B9:7:48:8054:16021#0/1 22 0 0
TGATACGGATACTGTAAGATAC

QA 1 22 1 22
DS VERSION: 1 TIME: Tue Jun 14 09:07:44 2011

RD ILLUMINA-E6F4B9:7:50:5308:7500#0/1 20 0 0
TGATACGGATACTGTAAGAT

QA 1 20 1 20
DS VERSION: 1 TIME: Tue Jun 14 09:07:44 2011

RD ILLUMINA-E6F4B9:7:51:16306:8442#0/1 23 0 0
TGATACGGATACTGTAAGATACA

QA 1 23 1 23
DS VERSION: 1 TIME: Tue Jun 14 09:07:44 2011

RD ILLUMINA-E6F4B9:7:52:12272:5087#0/1 23 0 0
TGATACGGATACTGTAAGATACA

QA 1 23 1 23
DS VERSION: 1 TIME: Tue Jun 14 09:07:44 2011

RD ILLUMINA-E6F4B9:7:53:4911:10250#0/1 22 0 0
TGATACGGATACTGTAAGATAC

QA 1 22 1 22
DS VERSION: 1 TIME: Tue Jun 14 09:07:44 2011

RD ILLUMINA-E6F4B9:7:55:1905:5632#0/1 22 0 0
TGATACGGATACTGTAAGATAC

QA 1 22 1 22
DS VERSION: 1 TIME: Tue Jun 14 09:07:44 2011

RD ILLUMINA-E6F4B9:7:57:8240:20453#0/1 22 0 0
TGATACGGATACTGTAAGATAC

QA 1 22 1 22
DS VERSION: 1 TIME: Tue Jun 14 09:07:44 2011

RD ILLUMINA-E6F4B9:7:60:8840:13411#0/1 23 0 0
TGATACGGATACTGTAAAATACA

QA 1 23 1 23
DS VERSION: 1 TIME: Tue Jun 14 09:07:44 2011

RD ILLUMINA-E6F4B9:7:64:2769:7269#0/1 24 0 0
TGATACGGATACTGTAAGATACTA

QA 1 24 1 22
DS VERSION: 1 TIME: Tue Jun 14 09:07:44 2011

RD ILLUMINA-E6F4B9:7:66:7543:13686#0/1 22 0 0
TGATACGGATACTGTAAGATAC

QA 1 22 1 22
DS VERSION: 1 TIME: Tue Jun 14 09:07:44 2011

RD ILLUMINA-E6F4B9:7:67:18036:2506#0/1 22 0 0
TGATACGGATACTGTAAGATAC

QA 1 22 1 22
DS VERSION: 1 TIME: Tue Jun 14 09:07:44 2011

RD ILLUMINA-E6F4B9:7:71:3953:13762#0/1 23 0 0
TGATACGGATACTGTAAGATACA

QA 1 23 1 23
DS VERSION: 1 TIME: Tue Jun 14 09:07:44 2011

RD ILLUMINA-E6F4B9:7:72:18758:12418#0/1 25 0 0
TGATACGGATACTGTAAGATACATC

QA 1 25 1 23
DS VERSION: 1 TIME: Tue Jun 14 09:07:44 2011

RD ILLUMINA-E6F4B9:7:77:6431:7436#0/1 22 0 0
TGATACGGATACTGTAAGATAC

QA 1 22 1 22
DS VERSION: 1 TIME: Tue Jun 14 09:07:44 2011

RD ILLUMINA-E6F4B9:7:86:13513:7658#0/1 21 0 0
TGATACGGATACTGTAAGATA

QA 1 21 1 21
DS VERSION: 1 TIME: Tue Jun 14 09:07:44 2011

RD ILLUMINA-E6F4B9:7:86:17421:12049#0/1 21 0 0
TGATACGGATACTGTAAGATA

QA 1 21 1 21
DS VERSION: 1 TIME: Tue Jun 14 09:07:44 2011

RD ILLUMINA-E6F4B9:7:91:18641:7016#0/1 22 0 0
TGATACGGATACTGTAAGATAC

QA 1 22 1 22
DS VERSION: 1 TIME: Tue Jun 14 09:07:44 2011

RD ILLUMINA-E6F4B9:7:93:2473:2068#0/1 23 0 0
TGATACGGATACTGTAAGATACA

QA 1 23 1 23
DS VERSION: 1 TIME: Tue Jun 14 09:07:44 2011

RD ILLUMINA-E6F4B9:7:94:12181:2771#0/1 21 0 0
TGATACGGATACTGTAAGATA

QA 1 21 1 21
DS VERSION: 1 TIME: Tue Jun 14 09:07:44 2011

RD ILLUMINA-E6F4B9:7:98:14280:6595#0/1 22 0 0
TGATACGGATACTGTAAGATAC

QA 1 22 1 22
DS VERSION: 1 TIME: Tue Jun 14 09:07:44 2011

RD ILLUMINA-E6F4B9:7:98:2373:18390#0/1 22 0 0
TGATACGGATACTGTAAGATAC

QA 1 22 1 22
DS VERSION: 1 TIME: Tue Jun 14 09:07:44 2011

RD ILLUMINA-E6F4B9:7:101:7824:11916#0/1 21 0 0
TGATACGGATACTGTAAGATA

QA 1 21 1 21
DS VERSION: 1 TIME: Tue Jun 14 09:07:44 2011

RD ILLUMINA-E6F4B9:7:105:6687:2024#0/1 21 0 0
TGATACGGATACTGTAAGATA

QA 1 21 1 21
DS VERSION: 1 TIME: Tue Jun 14 09:07:44 2011

RD ILLUMINA-E6F4B9:7:106:17806:2581#0/1 24 0 0
TGATACGGATACTGTAAGATACTC

QA 1 24 1 22
DS VERSION: 1 TIME: Tue Jun 14 09:07:44 2011

RD ILLUMINA-E6F4B9:7:106:9817:19571#0/1 22 0 0
TGATACGGATACTGTAAGATAC

QA 1 22 1 22
DS VERSION: 1 TIME: Tue Jun 14 09:07:44 2011

RD ILLUMINA-E6F4B9:7:107:1095:6601#0/1 21 0 0
TGATACGGATACTGTAAGATT

QA 1 21 1 20
DS VERSION: 1 TIME: Tue Jun 14 09:07:44 2011

RD ILLUMINA-E6F4B9:7:108:3544:5022#0/1 22 0 0
TGATACGGATACTGTAAGATAC

QA 1 22 1 22
DS VERSION: 1 TIME: Tue Jun 14 09:07:44 2011

RD ILLUMINA-E6F4B9:7:116:8399:6152#0/1 22 0 0
TGATACGGATACTGTAAGATAC

QA 1 22 1 22
DS VERSION: 1 TIME: Tue Jun 14 09:07:44 2011

RD ILLUMINA-E6F4B9:7:118:2598:17424#0/1 21 0 0
TGATACGGATACTGTAAGATA

QA 1 21 1 21
DS VERSION: 1 TIME: Tue Jun 14 09:07:44 2011

RD ILLUMINA-E6F4B9:7:6:8618:20295#0/1 22 0 0
GATACGGATACTGTAAGATACA

QA 1 22 1 22
DS VERSION: 1 TIME: Tue Jun 14 09:07:44 2011

RD ILLUMINA-E6F4B9:7:20:7759:3172#0/1 20 0 0
GATACGGATACTGTAAGATA

QA 1 20 1 20
DS VERSION: 1 TIME: Tue Jun 14 09:07:44 2011

RD ILLUMINA-E6F4B9:7:26:19147:13713#0/1 20 0 0
GATACGGATACTGTAAGATA

QA 1 20 1 20
DS VERSION: 1 TIME: Tue Jun 14 09:07:44 2011

RD ILLUMINA-E6F4B9:7:30:11472:8622#0/1 22 0 0
GATACGGATACTGTAAGATACA

QA 1 22 1 22
DS VERSION: 1 TIME: Tue Jun 14 09:07:44 2011

RD ILLUMINA-E6F4B9:7:31:13493:12778#0/1 20 0 0
GATACGGATACTGTAAGATA

QA 1 20 1 20
DS VERSION: 1 TIME: Tue Jun 14 09:07:44 2011

RD ILLUMINA-E6F4B9:7:73:9118:6002#0/1 20 0 0
GATACGGATACTGTAAGATA

QA 1 20 1 20
DS VERSION: 1 TIME: Tue Jun 14 09:07:44 2011

RD ILLUMINA-E6F4B9:7:85:14172:16822#0/1 22 0 0
GATACGGATACTGTAAGATACA

QA 1 22 1 22
DS VERSION: 1 TIME: Tue Jun 14 09:07:44 2011

RD ILLUMINA-E6F4B9:7:86:6667:11022#0/1 22 0 0
GATACGGATACTGTAAAATACA

QA 1 22 1 22
DS VERSION: 1 TIME: Tue Jun 14 09:07:44 2011

RD ILLUMINA-E6F4B9:7:86:16310:12746#0/1 22 0 0
GATACGGATACTGTAAGATACA

QA 1 22 1 22
DS VERSION: 1 TIME: Tue Jun 14 09:07:44 2011

RD ILLUMINA-E6F4B9:7:118:19428:13032#0/1 22 0 0
GATACGGATACTGTAAGATACA

QA 1 22 1 22
DS VERSION: 1 TIME: Tue Jun 14 09:07:44 2011

RD ILLUMINA-E6F4B9:7:4:7719:6625#0/1 22 0 0
ATACGGATACTGTAAGATACAG

QA 1 22 1 22
DS VERSION: 1 TIME: Tue Jun 14 09:07:44 2011

RD ILLUMINA-E6F4B9:7:10:15994:5805#0/1 21 0 0
ATACGGATACTGTAAGATACA

QA 1 21 1 21
DS VERSION: 1 TIME: Tue Jun 14 09:07:44 2011

RD ILLUMINA-E6F4B9:7:11:11821:1123#0/1 21 0 0
ATACGGATACTGTAAGATACA

QA 1 21 1 21
DS VERSION: 1 TIME: Tue Jun 14 09:07:44 2011

RD ILLUMINA-E6F4B9:7:11:9036:11261#0/1 21 0 0
ATACGGATACTGTAAGATACA

QA 1 21 1 21
DS VERSION: 1 TIME: Tue Jun 14 09:07:44 2011

RD ILLUMINA-E6F4B9:7:25:15550:8432#0/1 21 0 0
ATACGGATACTGTAAGATACA

QA 1 21 1 21
DS VERSION: 1 TIME: Tue Jun 14 09:07:44 2011

RD ILLUMINA-E6F4B9:7:29:11886:19341#0/1 21 0 0
ATACGGATACTGTAAGATACA

QA 1 21 1 21
DS VERSION: 1 TIME: Tue Jun 14 09:07:44 2011

RD ILLUMINA-E6F4B9:7:34:15213:9516#0/1 21 0 0
ATACGGATACTGTAAGATACA

QA 1 21 1 21
DS VERSION: 1 TIME: Tue Jun 14 09:07:44 2011

RD ILLUMINA-E6F4B9:7:37:9017:10469#0/1 21 0 0
ATACGGATACTGTAAGATACA

QA 1 21 1 21
DS VERSION: 1 TIME: Tue Jun 14 09:07:44 2011

RD ILLUMINA-E6F4B9:7:38:2399:11827#0/1 22 0 0
ATACGGATACTGTAAGATCCAG

QA 1 22 1 22
DS VERSION: 1 TIME: Tue Jun 14 09:07:44 2011

RD ILLUMINA-E6F4B9:7:40:13904:3397#0/1 21 0 0
ATACGGATACTGTAAGATACA

QA 1 21 1 21
DS VERSION: 1 TIME: Tue Jun 14 09:07:44 2011

RD ILLUMINA-E6F4B9:7:41:6711:8158#0/1 21 0 0
ATACGGATACTGTAAGATACA

QA 1 21 1 21
DS VERSION: 1 TIME: Tue Jun 14 09:07:44 2011

RD ILLUMINA-E6F4B9:7:46:2865:7431#0/1 22 0 0
ATACGGATACTGTAAGATACAG

QA 1 22 1 22
DS VERSION: 1 TIME: Tue Jun 14 09:07:44 2011

RD ILLUMINA-E6F4B9:7:47:16618:5981#0/1 21 0 0
ATACGGATACTGTAAGATACA

QA 1 21 1 21
DS VERSION: 1 TIME: Tue Jun 14 09:07:44 2011

RD ILLUMINA-E6F4B9:7:55:14379:10437#0/1 21 0 0
ATACGGATACTGTAAGATACA

QA 1 21 1 21
DS VERSION: 1 TIME: Tue Jun 14 09:07:44 2011

RD ILLUMINA-E6F4B9:7:73:4907:16585#0/1 22 0 0
ATACGGATACTGTAAGATACAC

QA 1 22 1 21
DS VERSION: 1 TIME: Tue Jun 14 09:07:44 2011

RD ILLUMINA-E6F4B9:7:75:15877:13454#0/1 21 0 0
ATACGGATACTGTAAGATACA

QA 1 21 1 21
DS VERSION: 1 TIME: Tue Jun 14 09:07:44 2011

RD ILLUMINA-E6F4B9:7:78:9183:9993#0/1 22 0 0
ATACGGATACTGTAAGATACAG

QA 1 22 1 22
DS VERSION: 1 TIME: Tue Jun 14 09:07:44 2011

RD ILLUMINA-E6F4B9:7:82:19659:4919#0/1 21 0 0
ATACGGATACTGTAAGATACA

QA 1 21 1 21
DS VERSION: 1 TIME: Tue Jun 14 09:07:44 2011

RD ILLUMINA-E6F4B9:7:82:2406:15279#0/1 21 0 0
ATACGGATACTGTAAGATACA

QA 1 21 1 21
DS VERSION: 1 TIME: Tue Jun 14 09:07:44 2011

RD ILLUMINA-E6F4B9:7:86:15761:10139#0/1 19 0 0
ATACGGATACTGTAAGATA

QA 1 19 1 19
DS VERSION: 1 TIME: Tue Jun 14 09:07:44 2011

RD ILLUMINA-E6F4B9:7:90:8385:16939#0/1 21 0 0
ATACGGATACTGTAAGATACA

QA 1 21 1 21
DS VERSION: 1 TIME: Tue Jun 14 09:07:44 2011

RD ILLUMINA-E6F4B9:7:90:5621:19438#0/1 22 0 0
ATACGGATACTGTAAGATACAG

QA 1 22 1 22
DS VERSION: 1 TIME: Tue Jun 14 09:07:44 2011

RD ILLUMINA-E6F4B9:7:91:19050:5804#0/1 21 0 0
ATACGGATACTGTAAGATACA

QA 1 21 1 21
DS VERSION: 1 TIME: Tue Jun 14 09:07:44 2011

RD ILLUMINA-E6F4B9:7:93:18757:6124#0/1 21 0 0
ATACGGATACTGTAAGATACA

QA 1 21 1 21
DS VERSION: 1 TIME: Tue Jun 14 09:07:44 2011

RD ILLUMINA-E6F4B9:7:97:14944:8737#0/1 19 0 0
ATACGGATACTGTAAGATA

QA 1 19 1 19
DS VERSION: 1 TIME: Tue Jun 14 09:07:44 2011

RD ILLUMINA-E6F4B9:7:101:12888:18453#0/1 22 0 0
ATACGGATACTGTAAGATACAG

QA 1 22 1 22
DS VERSION: 1 TIME: Tue Jun 14 09:07:44 2011

RD ILLUMINA-E6F4B9:7:113:19172:4683#0/1 22 0 0
ATACGGATACTGTAAGATACAG

QA 1 22 1 22
DS VERSION: 1 TIME: Tue Jun 14 09:07:44 2011

RD ILLUMINA-E6F4B9:7:115:15259:20927#0/1 21 0 0
ATACGGATACTGTAAGATACA

QA 1 21 1 21
DS VERSION: 1 TIME: Tue Jun 14 09:07:44 2011

RD ILLUMINA-E6F4B9:7:117:10214:11672#0/1 21 0 0
ATACGGATACTGTAAGATACA

QA 1 21 1 21
DS VERSION: 1 TIME: Tue Jun 14 09:07:44 2011

RD ILLUMINA-E6F4B9:7:120:18132:15432#0/1 21 0 0
ATACGGATACTGTAAGATACA

QA 1 21 1 21
DS VERSION: 1 TIME: Tue Jun 14 09:07:44 2011

RD ILLUMINA-E6F4B9:7:78:9575:1410#0/1 21 0 0
GTACGGATACTGTAAGATACA

QA 1 21 2 21
DS VERSION: 1 TIME: Tue Jun 14 09:07:44 2011

RD ILLUMINA-E6F4B9:7:5:14885:3018#0/1 20 0 0
TACGGATACTGTAAGATACA

QA 1 20 1 20
DS VERSION: 1 TIME: Tue Jun 14 09:07:44 2011

RD ILLUMINA-E6F4B9:7:10:3034:4588#0/1 20 0 0
TACGGATACTGTAAGATACA

QA 1 20 1 20
DS VERSION: 1 TIME: Tue Jun 14 09:07:44 2011

RD ILLUMINA-E6F4B9:7:12:12142:1524#0/1 22 0 0
TACGGATACTGGAAGATACAGA

QA 1 22 1 22
DS VERSION: 1 TIME: Tue Jun 14 09:07:44 2011

RD ILLUMINA-E6F4B9:7:14:5508:17532#0/1 22 0 0
TACGGATACTGTAAGATACAGA

QA 1 22 1 22
DS VERSION: 1 TIME: Tue Jun 14 09:07:44 2011

RD ILLUMINA-E6F4B9:7:15:18511:1446#0/1 22 0 0
TACGGATACTGTAAGATACAGA

QA 1 22 1 22
DS VERSION: 1 TIME: Tue Jun 14 09:07:44 2011

RD ILLUMINA-E6F4B9:7:16:16170:11713#0/1 22 0 0
TACGGATACTGTAAGATACAGA

QA 1 22 1 22
DS VERSION: 1 TIME: Tue Jun 14 09:07:44 2011

RD ILLUMINA-E6F4B9:7:18:3826:8537#0/1 22 0 0
TACGGATACTGTAAGATACAGA

QA 1 22 1 22
DS VERSION: 1 TIME: Tue Jun 14 09:07:44 2011

RD ILLUMINA-E6F4B9:7:20:3175:20222#0/1 20 0 0
TACGGATACTGTAAGATACA

QA 1 20 1 20
DS VERSION: 1 TIME: Tue Jun 14 09:07:44 2011

RD ILLUMINA-E6F4B9:7:25:17027:13260#0/1 20 0 0
TACGGATACTGTAAGATACA

QA 1 20 1 20
DS VERSION: 1 TIME: Tue Jun 14 09:07:44 2011

RD ILLUMINA-E6F4B9:7:27:11628:17960#0/1 22 0 0
TACGGATACTGTAAGATACAGA

QA 1 22 1 22
DS VERSION: 1 TIME: Tue Jun 14 09:07:44 2011

RD ILLUMINA-E6F4B9:7:31:3376:20752#0/1 20 0 0
TACGGATACTGTAAGATACA

QA 1 20 1 20
DS VERSION: 1 TIME: Tue Jun 14 09:07:44 2011

RD ILLUMINA-E6F4B9:7:35:1973:4214#0/1 20 0 0
TACGGATACTGTAAGATACA

QA 1 20 1 20
DS VERSION: 1 TIME: Tue Jun 14 09:07:44 2011

RD ILLUMINA-E6F4B9:7:42:12765:15352#0/1 22 0 0
TACGGATACTGTAAGATACAGA

QA 1 22 1 22
DS VERSION: 1 TIME: Tue Jun 14 09:07:44 2011

RD ILLUMINA-E6F4B9:7:63:2500:13642#0/1 20 0 0
TACGGATACTGTAAGATACA

QA 1 20 1 20
DS VERSION: 1 TIME: Tue Jun 14 09:07:44 2011

RD ILLUMINA-E6F4B9:7:64:13862:3060#0/1 20 0 0
TACGGATACTGTAAGATACA

QA 1 20 1 20
DS VERSION: 1 TIME: Tue Jun 14 09:07:44 2011

RD ILLUMINA-E6F4B9:7:64:15868:21260#0/1 22 0 0
TACGGATACTGTAAGATACAGA

QA 1 22 1 22
DS VERSION: 1 TIME: Tue Jun 14 09:07:44 2011

RD ILLUMINA-E6F4B9:7:72:14330:6291#0/1 20 0 0
TACGGATACTGTAAGATACA

QA 1 20 1 20
DS VERSION: 1 TIME: Tue Jun 14 09:07:44 2011

RD ILLUMINA-E6F4B9:7:73:11313:19119#0/1 22 0 0
TACGGATACTGTAAGATACAGA

QA 1 22 1 22
DS VERSION: 1 TIME: Tue Jun 14 09:07:44 2011

RD ILLUMINA-E6F4B9:7:78:7180:10020#0/1 22 0 0
TACGGATACTGTAAGATACAGA

QA 1 22 1 22
DS VERSION: 1 TIME: Tue Jun 14 09:07:44 2011

RD ILLUMINA-E6F4B9:7:81:12313:1402#0/1 22 0 0
TACGGATACTGTAAGATACAGA

QA 1 22 1 22
DS VERSION: 1 TIME: Tue Jun 14 09:07:44 2011

RD ILLUMINA-E6F4B9:7:84:6776:7030#0/1 22 0 0
TACGGATACTGTAAGATACAGA

QA 1 22 1 22
DS VERSION: 1 TIME: Tue Jun 14 09:07:44 2011

RD ILLUMINA-E6F4B9:7:87:13083:2579#0/1 20 0 0
TACGGATACTGTAAGATACA

QA 1 20 1 20
DS VERSION: 1 TIME: Tue Jun 14 09:07:44 2011

RD ILLUMINA-E6F4B9:7:91:1802:5712#0/1 22 0 0
TACGGATACTGTAAGATACAGA

QA 1 22 1 22
DS VERSION: 1 TIME: Tue Jun 14 09:07:44 2011

RD ILLUMINA-E6F4B9:7:104:4219:10756#0/1 20 0 0
TACGGATACTGTAAGATACA

QA 1 20 1 20
DS VERSION: 1 TIME: Tue Jun 14 09:07:44 2011

RD ILLUMINA-E6F4B9:7:105:18727:10828#0/1 22 0 0
TACGGATACTGTAAGATACAGA

QA 1 22 1 22
DS VERSION: 1 TIME: Tue Jun 14 09:07:44 2011

RD ILLUMINA-E6F4B9:7:107:14796:5210#0/1 20 0 0
TACGGATACTGTAAGATACA

QA 1 20 1 20
DS VERSION: 1 TIME: Tue Jun 14 09:07:44 2011

RD ILLUMINA-E6F4B9:7:107:5768:9209#0/1 20 0 0
TACGGATACTGTAAGATACA

QA 1 20 1 20
DS VERSION: 1 TIME: Tue Jun 14 09:07:44 2011

RD ILLUMINA-E6F4B9:7:108:2424:1251#0/1 20 0 0
TACGGATACTGTAAGATACA

QA 1 20 1 20
DS VERSION: 1 TIME: Tue Jun 14 09:07:44 2011

RD ILLUMINA-E6F4B9:7:117:6814:20411#0/1 20 0 0
TACGGATACTGTAAGATACA

QA 1 20 1 20
DS VERSION: 1 TIME: Tue Jun 14 09:07:44 2011

RD ILLUMINA-E6F4B9:7:118:13986:6214#0/1 22 0 0
TACGGATACTGTAAGATACAGA

QA 1 22 1 22
DS VERSION: 1 TIME: Tue Jun 14 09:07:44 2011

RD ILLUMINA-E6F4B9:7:4:8708:12846#0/1 22 0 0
ACGGATACTGTAAGATACAGAT

QA 1 22 1 22
DS VERSION: 1 TIME: Tue Jun 14 09:07:44 2011

RD ILLUMINA-E6F4B9:7:6:3970:4319#0/1 22 0 0
ACGGATACTGTAAGATACAGAT

QA 1 22 1 22
DS VERSION: 1 TIME: Tue Jun 14 09:07:44 2011

RD ILLUMINA-E6F4B9:7:83:9400:19986#0/1 25 0 0
AAACTGTATCTTACAGTATCCGTAT

QA 1 25 1 25
DS VERSION: 1 TIME: Tue Jun 14 09:07:44 2011

RD ILLUMINA-E6F4B9:7:68:11136:15208#0/1 23 0 0
ACTGTATCTTACAGTATCCGTAT

QA 1 23 1 23
DS VERSION: 1 TIME: Tue Jun 14 09:07:44 2011

RD ILLUMINA-E6F4B9:7:76:1621:1469#0/1 22 0 0
ACTGTATCTTACAGTATCCGTA

QA 1 22 1 22
DS VERSION: 1 TIME: Tue Jun 14 09:07:44 2011

RD ILLUMINA-E6F4B9:7:12:10794:2845#0/1 22 0 0
CTGTATCTTACAGTATCCGTAT

QA 1 22 1 22
DS VERSION: 1 TIME: Tue Jun 14 09:07:44 2011

RD ILLUMINA-E6F4B9:7:32:11777:1471#0/1 22 0 0
CTGTATCTTACAGTATCCGTAT

QA 1 22 1 22
DS VERSION: 1 TIME: Tue Jun 14 09:07:44 2011

RD ILLUMINA-E6F4B9:7:68:16422:3503#0/1 22 0 0
CTGTATCTTACAGTATCCGTAT

QA 1 22 1 22
DS VERSION: 1 TIME: Tue Jun 14 09:07:44 2011

RD ILLUMINA-E6F4B9:7:86:13666:1402#0/1 22 0 0
CTGTATCTTACAGTATCCGTAT

QA 1 22 1 22
DS VERSION: 1 TIME: Tue Jun 14 09:07:44 2011

RD ILLUMINA-E6F4B9:7:89:13860:1210#0/1 22 0 0
CTGTATCTTACAGTATCCGTAT

QA 1 22 1 22
DS VERSION: 1 TIME: Tue Jun 14 09:07:44 2011

RD ILLUMINA-E6F4B9:7:95:10119:4788#0/1 22 0 0
CTGTATCTTACAGTATCCGTAT

QA 1 22 1 22
DS VERSION: 1 TIME: Tue Jun 14 09:07:44 2011

RD ILLUMINA-E6F4B9:7:114:17615:15607#0/1 21 0 0
CTGTATCTTACAGTATCCGTA

QA 1 21 1 21
DS VERSION: 1 TIME: Tue Jun 14 09:07:44 2011

RD ILLUMINA-E6F4B9:7:34:9430:10199#0/1 24 0 0
GATGTATCTTACAGTATCCGTATC

QA 1 24 3 24
DS VERSION: 1 TIME: Tue Jun 14 09:07:44 2011

RD ILLUMINA-E6F4B9:7:119:15721:9210#0/1 22 0 0
GATGTATCTTACAGTATCCGTA

QA 1 22 3 22
DS VERSION: 1 TIME: Tue Jun 14 09:07:44 2011

RD ILLUMINA-E6F4B9:7:2:18070:13913#0/1 20 0 0
TGTATCTTACAGTATCCGTA

QA 1 20 1 20
DS VERSION: 1 TIME: Tue Jun 14 09:07:44 2011

RD ILLUMINA-E6F4B9:7:6:7021:4896#0/1 21 0 0
TGTATCTTACAGTATCCGTAT

QA 1 21 1 21
DS VERSION: 1 TIME: Tue Jun 14 09:07:44 2011

RD ILLUMINA-E6F4B9:7:6:2905:17555#0/1 21 0 0
TGTATCTTACAGTATCCGTAT

QA 1 21 1 21
DS VERSION: 1 TIME: Tue Jun 14 09:07:44 2011

RD ILLUMINA-E6F4B9:7:7:18322:3488#0/1 23 0 0
TGTATCTTACAGTATCCGTATCA

QA 1 23 1 23
DS VERSION: 1 TIME: Tue Jun 14 09:07:44 2011

RD ILLUMINA-E6F4B9:7:7:10647:5059#0/1 20 0 0
TGTATCTTACAGTATCCGTA

QA 1 20 1 20
DS VERSION: 1 TIME: Tue Jun 14 09:07:44 2011

RD ILLUMINA-E6F4B9:7:9:16850:1408#0/1 21 0 0
TGTATCTTACAGTATCCGTAT

QA 1 21 1 21
DS VERSION: 1 TIME: Tue Jun 14 09:07:44 2011

RD ILLUMINA-E6F4B9:7:9:4887:15554#0/1 21 0 0
TGTATCTTACAGTATCCGTAT

QA 1 21 1 21
DS VERSION: 1 TIME: Tue Jun 14 09:07:44 2011

RD ILLUMINA-E6F4B9:7:12:18661:10710#0/1 21 0 0
TGTATCTTACAGTATCCGTAT

QA 1 21 1 21
DS VERSION: 1 TIME: Tue Jun 14 09:07:44 2011

RD ILLUMINA-E6F4B9:7:14:17790:17737#0/1 21 0 0
TGTATCTTACAGTATCCGTAT

QA 1 21 1 21
DS VERSION: 1 TIME: Tue Jun 14 09:07:44 2011

RD ILLUMINA-E6F4B9:7:21:15055:15485#0/1 21 0 0
TGTATCTTACAGTATCCGTAT

QA 1 21 1 21
DS VERSION: 1 TIME: Tue Jun 14 09:07:44 2011

RD ILLUMINA-E6F4B9:7:32:14060:15120#0/1 21 0 0
TGTATCTTACAGTATCCGTAT

QA 1 21 1 21
DS VERSION: 1 TIME: Tue Jun 14 09:07:44 2011

RD ILLUMINA-E6F4B9:7:34:2873:7484#0/1 22 0 0
TGTATCTTACAGTATCCGTATC

QA 1 22 1 22
DS VERSION: 1 TIME: Tue Jun 14 09:07:44 2011

RD ILLUMINA-E6F4B9:7:39:2900:9156#0/1 21 0 0
TGTATCTTACAGTATCCGTAT

QA 1 21 1 21
DS VERSION: 1 TIME: Tue Jun 14 09:07:44 2011

RD ILLUMINA-E6F4B9:7:41:19461:13015#0/1 21 0 0
TGTATCTTACAGTATCCGTAT

QA 1 21 1 21
DS VERSION: 1 TIME: Tue Jun 14 09:07:44 2011

RD ILLUMINA-E6F4B9:7:41:16191:18088#0/1 21 0 0
TGTATCTTACAGTATCCGTAT

QA 1 21 1 21
DS VERSION: 1 TIME: Tue Jun 14 09:07:44 2011

RD ILLUMINA-E6F4B9:7:49:12680:14700#0/1 23 0 0
TGTATCTTACAGTATCCGTATCA

QA 1 23 1 23
DS VERSION: 1 TIME: Tue Jun 14 09:07:44 2011

RD ILLUMINA-E6F4B9:7:50:1883:3692#0/1 21 0 0
TGTATCTTACAGTATCCGTAT

QA 1 21 1 21
DS VERSION: 1 TIME: Tue Jun 14 09:07:44 2011

RD ILLUMINA-E6F4B9:7:62:13112:7463#0/1 23 0 0
TGTATCTTACAGTATCCGTATCA

QA 1 23 1 23
DS VERSION: 1 TIME: Tue Jun 14 09:07:44 2011

RD ILLUMINA-E6F4B9:7:63:2682:13960#0/1 21 0 0
TGTATCTTACAGTATCCGTAT

QA 1 21 1 21
DS VERSION: 1 TIME: Tue Jun 14 09:07:44 2011

RD ILLUMINA-E6F4B9:7:64:1460:20970#0/1 20 0 0
TGTATCTTACAGTATCCGTA

QA 1 20 1 20
DS VERSION: 1 TIME: Tue Jun 14 09:07:44 2011

RD ILLUMINA-E6F4B9:7:67:19026:17800#0/1 18 0 0
TGTATCTTACAGTATCCG

QA 1 18 1 18
DS VERSION: 1 TIME: Tue Jun 14 09:07:44 2011

RD ILLUMINA-E6F4B9:7:68:16315:12168#0/1 21 0 0
TGTATCTTACAGTATCCGTAT

QA 1 21 1 21
DS VERSION: 1 TIME: Tue Jun 14 09:07:44 2011

RD ILLUMINA-E6F4B9:7:69:11925:17828#0/1 21 0 0
TGTATCTTACAGTATCCGTAT

QA 1 21 1 21
DS VERSION: 1 TIME: Tue Jun 14 09:07:44 2011

RD ILLUMINA-E6F4B9:7:70:5619:14095#0/1 21 0 0
TGTATCTTACAGTATCCGTAT

QA 1 21 1 21
DS VERSION: 1 TIME: Tue Jun 14 09:07:44 2011

RD ILLUMINA-E6F4B9:7:75:4408:14730#0/1 21 0 0
TGTATCTTACAGTATCCGTAT

QA 1 21 1 21
DS VERSION: 1 TIME: Tue Jun 14 09:07:44 2011

RD ILLUMINA-E6F4B9:7:78:8507:9176#0/1 20 0 0
TGTATCTTACAGTATCCGTA

QA 1 20 1 20
DS VERSION: 1 TIME: Tue Jun 14 09:07:44 2011

RD ILLUMINA-E6F4B9:7:87:11682:16096#0/1 21 0 0
TGTATCTTACAGTATCCGTAT

QA 1 21 1 21
DS VERSION: 1 TIME: Tue Jun 14 09:07:44 2011

RD ILLUMINA-E6F4B9:7:87:13736:21126#0/1 20 0 0
TGTATCTTACAGTATCCGTA

QA 1 20 1 20
DS VERSION: 1 TIME: Tue Jun 14 09:07:44 2011

RD ILLUMINA-E6F4B9:7:88:5098:5477#0/1 21 0 0
TGTATCTTACAGTATCCGTAT

QA 1 21 1 21
DS VERSION: 1 TIME: Tue Jun 14 09:07:44 2011

RD ILLUMINA-E6F4B9:7:88:17280:12338#0/1 20 0 0
TGTATCTTACAGTATCCGTA

QA 1 20 1 20
DS VERSION: 1 TIME: Tue Jun 14 09:07:44 2011

RD ILLUMINA-E6F4B9:7:90:6217:6301#0/1 20 0 0
TGTATCTTACAGTATCCGTA

QA 1 20 1 20
DS VERSION: 1 TIME: Tue Jun 14 09:07:44 2011

RD ILLUMINA-E6F4B9:7:90:5659:19304#0/1 21 0 0
TGTATCTTACAGTATCCGTAT

QA 1 21 1 21
DS VERSION: 1 TIME: Tue Jun 14 09:07:44 2011

RD ILLUMINA-E6F4B9:7:91:3581:20671#0/1 21 0 0
TGTATCTTACAGTATCCGTAT

QA 1 21 1 21
DS VERSION: 1 TIME: Tue Jun 14 09:07:44 2011

RD ILLUMINA-E6F4B9:7:94:5552:3189#0/1 22 0 0
TGTATCTTACAGTATCCGTATC

QA 1 22 1 22
DS VERSION: 1 TIME: Tue Jun 14 09:07:44 2011

RD ILLUMINA-E6F4B9:7:108:19777:19329#0/1 20 0 0
TGTATCTTACAGTATCCGTA

QA 1 20 1 20
DS VERSION: 1 TIME: Tue Jun 14 09:07:44 2011

RD ILLUMINA-E6F4B9:7:112:18862:19016#0/1 20 0 0
TGTATCTTACAGTATCCGTA

QA 1 20 1 20
DS VERSION: 1 TIME: Tue Jun 14 09:07:44 2011

RD ILLUMINA-E6F4B9:7:114:17804:20623#0/1 20 0 0
TGTATCTTACAGTATCCGTA

QA 1 20 1 20
DS VERSION: 1 TIME: Tue Jun 14 09:07:44 2011

RD ILLUMINA-E6F4B9:7:117:15223:16456#0/1 20 0 0
TGTATCTTACAGTATCCGTA

QA 1 20 1 20
DS VERSION: 1 TIME: Tue Jun 14 09:07:44 2011

RD ILLUMINA-E6F4B9:7:119:19595:7010#0/1 21 0 0
TGTATCTTACAGTATCCGTAT

QA 1 21 1 21
DS VERSION: 1 TIME: Tue Jun 14 09:07:44 2011

RD ILLUMINA-E6F4B9:7:119:15317:10487#0/1 21 0 0
TGTATCTTACAGTATCCGTAT

QA 1 21 1 21
DS VERSION: 1 TIME: Tue Jun 14 09:07:44 2011

RD ILLUMINA-E6F4B9:7:27:5500:3859#0/1 23 0 0
AAAGTATCTTACAGTATCCGTAT

QA 1 23 4 23
DS VERSION: 1 TIME: Tue Jun 14 09:07:44 2011

RD ILLUMINA-E6F4B9:7:82:16721:5751#0/1 21 0 0
TCGTATCTTACAGTATCCGTA

QA 1 21 3 21
DS VERSION: 1 TIME: Tue Jun 14 09:07:44 2011

RD ILLUMINA-E6F4B9:7:9:13264:11949#0/1 22 0 0
GTATCTTACAGTATCCGTATCA

QA 1 22 1 22
DS VERSION: 1 TIME: Tue Jun 14 09:07:44 2011

RD ILLUMINA-E6F4B9:7:13:9464:19321#0/1 22 0 0
GTATGTTACAGTATCCGTATCA

QA 1 22 1 22
DS VERSION: 1 TIME: Tue Jun 14 09:07:44 2011

RD ILLUMINA-E6F4B9:7:27:10108:3547#0/1 22 0 0
GTATCTTACAGTATCCGTATCA

QA 1 22 1 22
DS VERSION: 1 TIME: Tue Jun 14 09:07:44 2011

RD ILLUMINA-E6F4B9:7:32:9179:10384#0/1 22 0 0
GTATCTTACAGTATCCGTATCA

QA 1 22 1 22
DS VERSION: 1 TIME: Tue Jun 14 09:07:44 2011

RD ILLUMINA-E6F4B9:7:35:9545:18530#0/1 20 0 0
GTATCTTACAGTATCCGTAT

QA 1 20 1 20
DS VERSION: 1 TIME: Tue Jun 14 09:07:44 2011

RD ILLUMINA-E6F4B9:7:39:18655:3143#0/1 22 0 0
GTATCTTACAGTATCCGTATCA

QA 1 22 1 22
DS VERSION: 1 TIME: Tue Jun 14 09:07:44 2011

RD ILLUMINA-E6F4B9:7:60:9378:3222#0/1 22 0 0
GTATCTTACAGTATCCGTATCA

QA 1 22 1 22
DS VERSION: 1 TIME: Tue Jun 14 09:07:44 2011

RD ILLUMINA-E6F4B9:7:62:8646:10614#0/1 22 0 0
GTATCTTACAGTATCCGTATCA

QA 1 22 1 22
DS VERSION: 1 TIME: Tue Jun 14 09:07:44 2011

RD ILLUMINA-E6F4B9:7:64:3352:2202#0/1 21 0 0
GTATCTTACAGTATCCGTATC

QA 1 21 1 21
DS VERSION: 1 TIME: Tue Jun 14 09:07:44 2011

RD ILLUMINA-E6F4B9:7:67:1613:4912#0/1 22 0 0
GTATCTTACAGTATCCGTATCA

QA 1 22 1 22
DS VERSION: 1 TIME: Tue Jun 14 09:07:44 2011

RD ILLUMINA-E6F4B9:7:67:18526:7966#0/1 24 0 0
GTATCTTACAGTATCCGTATCACG

QA 1 24 1 24
DS VERSION: 1 TIME: Tue Jun 14 09:07:44 2011

RD ILLUMINA-E6F4B9:7:67:10786:15530#0/1 22 0 0
GTATCTTACAGTATCCGTATCA

QA 1 22 1 22
DS VERSION: 1 TIME: Tue Jun 14 09:07:44 2011

RD ILLUMINA-E6F4B9:7:74:18181:15987#0/1 22 0 0
GTATCTTACAGTATCCGTATCA

QA 1 22 1 22
DS VERSION: 1 TIME: Tue Jun 14 09:07:44 2011

RD ILLUMINA-E6F4B9:7:75:18830:9605#0/1 22 0 0
GTATCTTACAGTATCCGTATCA

QA 1 22 1 22
DS VERSION: 1 TIME: Tue Jun 14 09:07:44 2011

RD ILLUMINA-E6F4B9:7:88:9498:6813#0/1 22 0 0
GTATCTTACAGTATCCGTATCA

QA 1 22 1 22
DS VERSION: 1 TIME: Tue Jun 14 09:07:44 2011

RD ILLUMINA-E6F4B9:7:96:3040:8830#0/1 22 0 0
GTATCTTACAGTATCCGTATCA

QA 1 22 1 22
DS VERSION: 1 TIME: Tue Jun 14 09:07:44 2011

RD ILLUMINA-E6F4B9:7:104:18922:8295#0/1 22 0 0
GTATCTTACAGTATCCGTATCA

QA 1 22 1 22
DS VERSION: 1 TIME: Tue Jun 14 09:07:44 2011

RD ILLUMINA-E6F4B9:7:117:14434:17627#0/1 22 0 0
GTATCTTACAGTATCCGTATCA

QA 1 22 1 22
DS VERSION: 1 TIME: Tue Jun 14 09:07:44 2011

RD ILLUMINA-E6F4B9:7:118:19310:18429#0/1 21 0 0
GTATCTTACAGTATCCGTATC

QA 1 21 1 21
DS VERSION: 1 TIME: Tue Jun 14 09:07:44 2011

RD ILLUMINA-E6F4B9:7:120:11766:10789#0/1 22 0 0
GTATCTTACAGTATCCGTATCA

QA 1 22 1 22
DS VERSION: 1 TIME: Tue Jun 14 09:07:44 2011

RD ILLUMINA-E6F4B9:7:120:16077:14114#0/1 22 0 0
GTATCTTACAGTATCCGTATCA

QA 1 22 1 22
DS VERSION: 1 TIME: Tue Jun 14 09:07:44 2011

RD ILLUMINA-E6F4B9:7:103:2165:21311#0/1 24 0 0
GATATCTTACAGTATCCGTATCAC

QA 1 24 3 24
DS VERSION: 1 TIME: Tue Jun 14 09:07:44 2011

RD ILLUMINA-E6F4B9:7:15:6922:9384#0/1 23 0 0
TATCTTTCAGTATCCGTATCACG

QA 1 23 1 23
DS VERSION: 1 TIME: Tue Jun 14 09:07:44 2011

RD ILLUMINA-E6F4B9:7:23:3112:19095#0/1 22 0 0
TATCTTACAGTATCCGTATCAC

QA 1 22 1 22
DS VERSION: 1 TIME: Tue Jun 14 09:07:44 2011

RD ILLUMINA-E6F4B9:7:32:6780:3560#0/1 21 0 0
TATCTTACAGTATCCGTATCA

QA 1 21 1 21
DS VERSION: 1 TIME: Tue Jun 14 09:07:44 2011

RD ILLUMINA-E6F4B9:7:38:4686:1087#0/1 22 0 0
TATCTTACAGTATCCGTATCAC

QA 1 22 1 22
DS VERSION: 1 TIME: Tue Jun 14 09:07:44 2011

RD ILLUMINA-E6F4B9:7:42:1787:14611#0/1 22 0 0
TATCTTACAGTATCCGTATCAC

QA 1 22 1 22
DS VERSION: 1 TIME: Tue Jun 14 09:07:44 2011

RD ILLUMINA-E6F4B9:7:54:3059:19183#0/1 22 0 0
TATCTTACAGTATCCGTATCAC

QA 1 22 1 22
DS VERSION: 1 TIME: Tue Jun 14 09:07:44 2011

RD ILLUMINA-E6F4B9:7:80:16440:17425#0/1 22 0 0
TATCTTACAGTATCCGTATCAC

QA 1 22 1 22
DS VERSION: 1 TIME: Tue Jun 14 09:07:44 2011

RD ILLUMINA-E6F4B9:7:105:8255:5767#0/1 21 0 0
TATCTTACAGTATCCGTATCA

QA 1 21 1 21
DS VERSION: 1 TIME: Tue Jun 14 09:07:44 2011

RD ILLUMINA-E6F4B9:7:112:8498:15789#0/1 20 0 0
TATCTTACAGTATCCGTATC

QA 1 20 1 20
DS VERSION: 1 TIME: Tue Jun 14 09:07:44 2011

RD ILLUMINA-E6F4B9:7:117:10091:16106#0/1 22 0 0
TATCTTACAGTATCCGTATCAC

QA 1 22 1 22
DS VERSION: 1 TIME: Tue Jun 14 09:07:44 2011

RD ILLUMINA-E6F4B9:7:118:9686:9383#0/1 21 0 0
TATCTTACAGTATCCGTATCA

QA 1 21 1 21
DS VERSION: 1 TIME: Tue Jun 14 09:07:44 2011

RD ILLUMINA-E6F4B9:7:65:8867:6387#0/1 24 0 0
CGATCTTACAGTATCCGTATCACG

QA 1 24 3 24
DS VERSION: 1 TIME: Tue Jun 14 09:07:44 2011

RD ILLUMINA-E6F4B9:7:6:4842:11593#0/1 18 0 0
ATCTTACAGTATCCGTAT

QA 1 18 1 18
DS VERSION: 1 TIME: Tue Jun 14 09:07:44 2011

RD ILLUMINA-E6F4B9:7:15:13912:3210#0/1 21 0 0
ATCTTACAGTATCCGTATCAC

QA 1 21 1 21
DS VERSION: 1 TIME: Tue Jun 14 09:07:44 2011

RD ILLUMINA-E6F4B9:7:17:10024:3938#0/1 21 0 0
ATCTTACAGTATCCGTATCAC

QA 1 21 1 21
DS VERSION: 1 TIME: Tue Jun 14 09:07:44 2011

RD ILLUMINA-E6F4B9:7:20:6413:2387#0/1 21 0 0
ATCTTACAGTATCCGTATCAC

QA 1 21 1 21
DS VERSION: 1 TIME: Tue Jun 14 09:07:44 2011

RD ILLUMINA-E6F4B9:7:28:15344:13944#0/1 20 0 0
ATCTTACAGTATCCGTATCA

QA 1 20 1 20
DS VERSION: 1 TIME: Tue Jun 14 09:07:44 2011

RD ILLUMINA-E6F4B9:7:33:19552:9505#0/1 21 0 0
ATCTTACAGTATCCGTATCAC

QA 1 21 1 21
DS VERSION: 1 TIME: Tue Jun 14 09:07:44 2011

RD ILLUMINA-E6F4B9:7:38:17733:3703#0/1 21 0 0
ATCTTACAGTATCCGTATCAC

QA 1 21 1 21
DS VERSION: 1 TIME: Tue Jun 14 09:07:44 2011

RD ILLUMINA-E6F4B9:7:64:15159:8037#0/1 21 0 0
ATCTTACAGTATCCGTATCAC

QA 1 21 1 21
DS VERSION: 1 TIME: Tue Jun 14 09:07:44 2011

RD ILLUMINA-E6F4B9:7:67:7596:2203#0/1 21 0 0
ATCTTACAGTATCCGTATCAC

QA 1 21 1 21
DS VERSION: 1 TIME: Tue Jun 14 09:07:44 2011

RD ILLUMINA-E6F4B9:7:103:16808:12177#0/1 20 0 0
ATCTTACAGTATCCGTATCA

QA 1 20 1 20
DS VERSION: 1 TIME: Tue Jun 14 09:07:44 2011

RD ILLUMINA-E6F4B9:7:106:9372:3291#0/1 21 0 0
ATCTTACAGTATCCGTATCAC

QA 1 21 1 21
DS VERSION: 1 TIME: Tue Jun 14 09:07:44 2011

RD ILLUMINA-E6F4B9:7:113:13104:16842#0/1 21 0 0
ATCTTACAGTATCCGTATCAC

QA 1 21 1 21
DS VERSION: 1 TIME: Tue Jun 14 09:07:44 2011

RD ILLUMINA-E6F4B9:7:3:13311:18574#0/1 22 0 0
TCTTACAGTATCCGTATCACGA

QA 1 22 1 21
DS VERSION: 1 TIME: Tue Jun 14 09:07:44 2011

RD ILLUMINA-E6F4B9:7:21:10460:19297#0/1 21 0 0
TCTTACAGTATCCGTATCACG

QA 1 21 1 21
DS VERSION: 1 TIME: Tue Jun 14 09:07:44 2011

RD ILLUMINA-E6F4B9:7:26:2078:20076#0/1 21 0 0
TCTTACAGTATCCGTATCACG

QA 1 21 1 21
DS VERSION: 1 TIME: Tue Jun 14 09:07:44 2011

RD ILLUMINA-E6F4B9:7:78:15857:5159#0/1 22 0 0
TCTTACAGTATCCGTATCACGA

QA 1 22 1 21
DS VERSION: 1 TIME: Tue Jun 14 09:07:44 2011

RD ILLUMINA-E6F4B9:7:95:12152:14125#0/1 21 0 0
TCTTACAGTATCCGTATCACG

QA 1 21 1 21
DS VERSION: 1 TIME: Tue Jun 14 09:07:44 2011

RD ILLUMINA-E6F4B9:7:97:11524:11302#0/1 21 0 0
TCTTACAGTATCCGTATCACG

QA 1 21 1 21
DS VERSION: 1 TIME: Tue Jun 14 09:07:44 2011

RD ILLUMINA-E6F4B9:7:107:5928:19468#0/1 22 0 0
TCTTACAGTATCCGTATCACGA

QA 1 22 1 21
DS VERSION: 1 TIME: Tue Jun 14 09:07:44 2011

RD ILLUMINA-E6F4B9:7:114:17698:20321#0/1 21 0 0
TCTTACAGTATCCGTATCACG

QA 1 21 1 21
DS VERSION: 1 TIME: Tue Jun 14 09:07:44 2011

RD ILLUMINA-E6F4B9:7:2:5212:14739#0/1 21 0 0
CTTACAGTATCCGTATCACGA

QA 1 21 1 20
DS VERSION: 1 TIME: Tue Jun 14 09:07:44 2011

RD ILLUMINA-E6F4B9:7:28:6082:16305#0/1 21 0 0
CTTACAGTATCCGTATCACGA

QA 1 21 1 20
DS VERSION: 1 TIME: Tue Jun 14 09:07:44 2011

RD ILLUMINA-E6F4B9:7:28:19181:18578#0/1 22 0 0
CTTACAGTATCCGTATCACGAA

QA 1 22 1 20
DS VERSION: 1 TIME: Tue Jun 14 09:07:44 2011

RD ILLUMINA-E6F4B9:7:90:2892:10840#0/1 21 0 0
CTTACAGTATCCGTATCACGA

QA 1 21 1 20
DS VERSION: 1 TIME: Tue Jun 14 09:07:44 2011

RD ILLUMINA-E6F4B9:7:101:19256:7218#0/1 21 0 0
CTTACAGTATCCGTATCACGA

QA 1 21 1 20
DS VERSION: 1 TIME: Tue Jun 14 09:07:44 2011

RD ILLUMINA-E6F4B9:7:68:10165:19814#0/1 22 0 0
GTTTTTTACAGTATCCGTATCA

QA 1 22 6 22
DS VERSION: 1 TIME: Tue Jun 14 09:07:44 2011

RD ILLUMINA-E6F4B9:7:52:7426:10489#0/1 21 0 0
TTACAGTATCCGTATCACGAA

QA 1 21 1 19
DS VERSION: 1 TIME: Tue Jun 14 09:07:44 2011

RD ILLUMINA-E6F4B9:7:56:15096:8934#0/1 21 0 0
TTACAGTATCCGTATCACGAA

QA 1 21 1 19
DS VERSION: 1 TIME: Tue Jun 14 09:07:44 2011

RD ILLUMINA-E6F4B9:7:100:9999:17109#0/1 21 0 0
TTACAGTATCCGTATCACGAA

QA 1 21 1 19
DS VERSION: 1 TIME: Tue Jun 14 09:07:44 2011

RD ILLUMINA-E6F4B9:7:74:16939:1049#0/1 23 0 0
CGAATCGAGTGATGAATTCAGTC

QA 1 23 1 23
DS VERSION: 1 TIME: Tue Jun 14 09:07:44 2011

RD ILLUMINA-E6F4B9:7:85:10504:2200#0/1 23 0 0
CGAATCGAGTGATGAATTCAGTC

QA 1 23 1 23
DS VERSION: 1 TIME: Tue Jun 14 09:07:44 2011

RD ILLUMINA-E6F4B9:7:100:3212:19873#0/1 23 0 0
CGAATCGAGTGATGAATTCAGTC

QA 1 23 1 23
DS VERSION: 1 TIME: Tue Jun 14 09:07:44 2011

RD ILLUMINA-E6F4B9:7:74:7180:15967#0/1 25 0 0
ATAATCGAGTGATGAATTCAGTCTG

QA 1 25 3 25
DS VERSION: 1 TIME: Tue Jun 14 09:07:44 2011

RD ILLUMINA-E6F4B9:7:34:7515:17532#0/1 23 0 0
AATCGAGTGATGAATTCAGTCTG

QA 1 23 1 23
DS VERSION: 1 TIME: Tue Jun 14 09:07:44 2011

RD ILLUMINA-E6F4B9:7:38:8040:15547#0/1 23 0 0
AATCGAGTGATGAATTCAGTCTG

QA 1 23 1 23
DS VERSION: 1 TIME: Tue Jun 14 09:07:44 2011

RD ILLUMINA-E6F4B9:7:39:12772:5040#0/1 22 0 0
AATCGAGTGATGAATTCAGTCT

QA 1 22 1 22
DS VERSION: 1 TIME: Tue Jun 14 09:07:44 2011

RD ILLUMINA-E6F4B9:7:47:14616:16644#0/1 23 0 0
AATCGAGTGATGAATTCAGTCTG

QA 1 23 1 23
DS VERSION: 1 TIME: Tue Jun 14 09:07:44 2011

RD ILLUMINA-E6F4B9:7:49:10598:7233#0/1 23 0 0
AATCGAGTGATGAATTCAGTCTG

QA 1 23 1 23
DS VERSION: 1 TIME: Tue Jun 14 09:07:44 2011

RD ILLUMINA-E6F4B9:7:52:3140:1424#0/1 22 0 0
AATCGAGTGATGAATTCAGTCT

QA 1 22 1 22
DS VERSION: 1 TIME: Tue Jun 14 09:07:44 2011

RD ILLUMINA-E6F4B9:7:54:8864:19775#0/1 23 0 0
AATCGAGTGATGAATTCAGTCTG

QA 1 23 1 23
DS VERSION: 1 TIME: Tue Jun 14 09:07:44 2011

RD ILLUMINA-E6F4B9:7:56:8943:19918#0/1 22 0 0
AATCGAGTGATGAATTCAGTCT

QA 1 22 1 22
DS VERSION: 1 TIME: Tue Jun 14 09:07:44 2011

RD ILLUMINA-E6F4B9:7:70:8712:9805#0/1 23 0 0
AATCGAGTGATGAATTCAGTCTG

QA 1 23 1 23
DS VERSION: 1 TIME: Tue Jun 14 09:07:44 2011

RD ILLUMINA-E6F4B9:7:83:12690:7475#0/1 23 0 0
AATCGAGTGATGAATTCAGTCTG

QA 1 23 1 23
DS VERSION: 1 TIME: Tue Jun 14 09:07:44 2011

RD ILLUMINA-E6F4B9:7:87:4517:1650#0/1 22 0 0
AATCGAGTGATGAATTCAGTCT

QA 1 22 1 22
DS VERSION: 1 TIME: Tue Jun 14 09:07:44 2011

RD ILLUMINA-E6F4B9:7:116:14161:6099#0/1 23 0 0
AATCGAGTGATGAATTCAGTCTG

QA 1 23 1 23
DS VERSION: 1 TIME: Tue Jun 14 09:07:44 2011

RD ILLUMINA-E6F4B9:7:10:3051:11632#0/1 22 0 0
ATCGAGTGATGAATTCAGTCTG

QA 1 22 4 22
DS VERSION: 1 TIME: Tue Jun 14 09:07:44 2011

RD ILLUMINA-E6F4B9:7:23:15645:20135#0/1 22 0 0
ATCGAGTGATGAATTCAGTCTG

QA 1 22 4 22
DS VERSION: 1 TIME: Tue Jun 14 09:07:44 2011

RD ILLUMINA-E6F4B9:7:26:17447:17324#0/1 22 0 0
ATCGAGTGATGAATTCAGTCTG

QA 1 22 4 22
DS VERSION: 1 TIME: Tue Jun 14 09:07:44 2011

RD ILLUMINA-E6F4B9:7:34:7780:9884#0/1 22 0 0
ATCGAGTGATGAATTCAGTCTG

QA 1 22 4 22
DS VERSION: 1 TIME: Tue Jun 14 09:07:44 2011

RD ILLUMINA-E6F4B9:7:34:13458:18093#0/1 22 0 0
ATCGAGTGATGAATTCAGTCCG

QA 1 22 4 20
DS VERSION: 1 TIME: Tue Jun 14 09:07:44 2011

RD ILLUMINA-E6F4B9:7:36:9048:13590#0/1 22 0 0
ATCGAGTGATGAATTCAGTCTG

QA 1 22 4 22
DS VERSION: 1 TIME: Tue Jun 14 09:07:44 2011

RD ILLUMINA-E6F4B9:7:50:9967:17092#0/1 22 0 0
ATCGAGTGATGAATTCAGTCTG

QA 1 22 4 22
DS VERSION: 1 TIME: Tue Jun 14 09:07:44 2011

RD ILLUMINA-E6F4B9:7:67:13878:9104#0/1 22 0 0
ATCGAGTGATGAATTCAGTCTG

QA 1 22 4 22
DS VERSION: 1 TIME: Tue Jun 14 09:07:44 2011

RD ILLUMINA-E6F4B9:7:67:6366:15752#0/1 22 0 0
ATCGAGTGATGAATTCAGTCCG

QA 1 22 4 20
DS VERSION: 1 TIME: Tue Jun 14 09:07:44 2011

RD ILLUMINA-E6F4B9:7:74:3929:9354#0/1 22 0 0
ATCGAGTGATGAATTCAGTCTG

QA 1 22 4 22
DS VERSION: 1 TIME: Tue Jun 14 09:07:44 2011

RD ILLUMINA-E6F4B9:7:85:18391:4416#0/1 22 0 0
ATCGAGTGATGAATTCAGTCTG

QA 1 22 4 22
DS VERSION: 1 TIME: Tue Jun 14 09:07:44 2011

RD ILLUMINA-E6F4B9:7:88:3263:9824#0/1 22 0 0
ATCGAGTGATGAATTCAGTCTG

QA 1 22 4 22
DS VERSION: 1 TIME: Tue Jun 14 09:07:44 2011

RD ILLUMINA-E6F4B9:7:98:14561:15639#0/1 22 0 0
ATCGAGTGATGAATTCAGTCTG

QA 1 22 4 22
DS VERSION: 1 TIME: Tue Jun 14 09:07:44 2011

RD ILLUMINA-E6F4B9:7:75:13905:1208#0/1 22 0 0
CGAGTGATGAATTCAGTCTGCG

QA 1 22 2 22
DS VERSION: 1 TIME: Tue Jun 14 09:07:44 2011

RD ILLUMINA-E6F4B9:7:41:11307:11182#0/1 22 0 0
AGTGATGAATTCAGTCTGCGTT

QA 1 22 1 20
DS VERSION: 1 TIME: Tue Jun 14 09:07:44 2011

RD ILLUMINA-E6F4B9:7:60:13550:13765#0/1 27 0 0
AGTGATGAATTCAGTCTGCGTTGAACA

QA 1 27 1 27
DS VERSION: 1 TIME: Tue Jun 14 09:07:44 2011

RD ILLUMINA-E6F4B9:7:38:15339:12328#0/1 24 0 0
GATGAATTCAGTCTGCGTTGAACT

QA 1 24 1 23
DS VERSION: 1 TIME: Tue Jun 14 09:07:44 2011

RD ILLUMINA-E6F4B9:7:108:10095:4472#0/1 25 0 0
GATGAATTCAGTCTGCGTTGAACAT

QA 1 25 1 25
DS VERSION: 1 TIME: Tue Jun 14 09:07:44 2011

RD ILLUMINA-E6F4B9:7:69:1555:16365#0/1 29 0 0
TGAATTCAGTCTGCGTTGAACATTCGCCG

QA 1 29 1 29
DS VERSION: 1 TIME: Tue Jun 14 09:07:44 2011

RD ILLUMINA-E6F4B9:7:9:2005:11115#0/1 27 0 0
GAATTCAGTCTGCGTTGAACATTCGCC

QA 1 27 1 27
DS VERSION: 1 TIME: Tue Jun 14 09:07:44 2011

RD ILLUMINA-E6F4B9:7:27:9408:6508#0/1 24 0 0
GAATTCAGTCTGCGTTGAACATTC

QA 1 24 1 24
DS VERSION: 1 TIME: Tue Jun 14 09:07:44 2011

RD ILLUMINA-E6F4B9:7:117:2008:9117#0/1 23 0 0
GAATTCAGTCTGCGTTGAACATT

QA 1 23 1 23
DS VERSION: 1 TIME: Tue Jun 14 09:07:44 2011

RD ILLUMINA-E6F4B9:7:119:6031:18479#0/1 22 0 0
GAATTCAGTCTGCGTTGAACAT

QA 1 22 1 22
DS VERSION: 1 TIME: Tue Jun 14 09:07:44 2011

RD ILLUMINA-E6F4B9:7:83:4104:20684#0/1 25 0 0
AAATTCAGTCTGCGTTGAACATTCG

QA 1 25 2 25
DS VERSION: 1 TIME: Tue Jun 14 09:07:44 2011

RD ILLUMINA-E6F4B9:7:47:12422:19874#0/1 24 0 0
AATTCAGTCTGCGTTGAACATTCG

QA 1 24 1 24
DS VERSION: 1 TIME: Tue Jun 14 09:07:44 2011

RD ILLUMINA-E6F4B9:7:67:6517:11158#0/1 22 0 0
AATTCAGTCTGCGTTGAACATT

QA 1 22 1 22
DS VERSION: 1 TIME: Tue Jun 14 09:07:44 2011

RD ILLUMINA-E6F4B9:7:93:12161:19441#0/1 24 0 0
AATTCAGTCTGCGTTGAACATTCG

QA 1 24 1 24
DS VERSION: 1 TIME: Tue Jun 14 09:07:44 2011

RD ILLUMINA-E6F4B9:7:108:7032:3842#0/1 24 0 0
TATTCAGTCTGCGTTGAACATTCG

QA 1 24 2 24
DS VERSION: 1 TIME: Tue Jun 14 09:07:44 2011

RD ILLUMINA-E6F4B9:7:14:18055:10558#0/1 25 0 0
ATTCAGTCTGCGTTGAACATTCGCC

QA 1 25 1 25
DS VERSION: 1 TIME: Tue Jun 14 09:07:44 2011

RD ILLUMINA-E6F4B9:7:36:19611:18131#0/1 25 0 0
ATTCAGTCTGCGTTGAACATTCGCC

QA 1 25 1 25
DS VERSION: 1 TIME: Tue Jun 14 09:07:44 2011

RD ILLUMINA-E6F4B9:7:63:6760:10595#0/1 23 0 0
ATTCAGTCTGCGTTGAACATTCG

QA 1 23 1 23
DS VERSION: 1 TIME: Tue Jun 14 09:07:44 2011

RD ILLUMINA-E6F4B9:7:77:3885:11509#0/1 23 0 0
ATTCAGTCTGCGTTGAACATTCG

QA 1 23 1 23
DS VERSION: 1 TIME: Tue Jun 14 09:07:44 2011

RD ILLUMINA-E6F4B9:7:84:1612:14530#0/1 26 0 0
ATTCAGTCTGCGTTGAACATTCGCCG

QA 1 26 1 26
DS VERSION: 1 TIME: Tue Jun 14 09:07:44 2011

RD ILLUMINA-E6F4B9:7:69:5466:11087#0/1 22 0 0
TTTCAGTCTGCGTTGAACATTC

QA 1 22 2 22
DS VERSION: 1 TIME: Tue Jun 14 09:07:44 2011

RD ILLUMINA-E6F4B9:7:7:13114:7507#0/1 23 0 0
TTCAGTCTGCGTTGAACATTCGC

QA 1 23 1 23
DS VERSION: 1 TIME: Tue Jun 14 09:07:44 2011

RD ILLUMINA-E6F4B9:7:120:9262:4990#0/1 23 0 0
TTCAGTCTGCGTTGAACATTCGC

QA 1 23 1 23
DS VERSION: 1 TIME: Tue Jun 14 09:07:44 2011

RD ILLUMINA-E6F4B9:7:86:9447:14390#0/1 29 0 0
AGTCTGCGTTGAACATTCGCCGTGTGAAC

QA 1 29 1 29
DS VERSION: 1 TIME: Tue Jun 14 09:07:44 2011

RD ILLUMINA-E6F4B9:7:33:7594:3048#0/1 28 0 0
GTCTGCGTTGAACATTCGCCGTGTGAAC

QA 1 28 1 28
DS VERSION: 1 TIME: Tue Jun 14 09:07:44 2011

RD ILLUMINA-E6F4B9:7:93:15094:7804#0/1 26 0 0
CTGCGTTGAACATTCGCCGTGTGAAC

QA 1 26 1 26
DS VERSION: 1 TIME: Tue Jun 14 09:07:44 2011

RD ILLUMINA-E6F4B9:7:37:13222:6024#0/1 23 0 0
TGCGTTGAACATTCGCCGTGTGA

QA 1 23 1 23
DS VERSION: 1 TIME: Tue Jun 14 09:07:44 2011

RD ILLUMINA-E6F4B9:7:112:4782:21298#0/1 24 0 0
GCGTTGAACATTCGCCGTGTGAAC

QA 1 24 1 24
DS VERSION: 1 TIME: Tue Jun 14 09:07:44 2011

RD ILLUMINA-E6F4B9:7:97:4271:13432#0/1 20 0 0
GTTGAACATTCGCCGTGTGA

QA 1 20 3 20
DS VERSION: 1 TIME: Tue Jun 14 09:07:44 2011

RD ILLUMINA-E6F4B9:7:100:12843:6663#0/1 23 0 0
GTTGAACATTCGCCGTGTGAACA

QA 1 23 3 23
DS VERSION: 1 TIME: Tue Jun 14 09:07:44 2011

RD ILLUMINA-E6F4B9:7:17:9586:3465#0/1 21 0 0
TGAACATTCGCCGTGTGAACA

QA 1 21 1 21
DS VERSION: 1 TIME: Tue Jun 14 09:07:44 2011

RD ILLUMINA-E6F4B9:7:12:14518:2385#0/1 19 0 0
AACATTCGCCGTGTGAACA

QA 1 19 1 19
DS VERSION: 1 TIME: Tue Jun 14 09:07:44 2011

RD ILLUMINA-E6F4B9:7:44:10657:14034#0/1 18 0 0
ACATTCGCCGTGTGAACA

QA 1 18 1 18
DS VERSION: 1 TIME: Tue Jun 14 09:07:44 2011

RD ILLUMINA-E6F4B9:7:63:12330:4284#0/1 19 0 0
CATTCGCCGTGTGAACACG

QA 1 19 1 19
DS VERSION: 1 TIME: Tue Jun 14 09:07:44 2011

RD ILLUMINA-E6F4B9:7:110:4629:13584#0/1 29 0 0
CATTCGCCGTGTGAACACGGAAACCTCGT

QA 1 29 1 24
DS VERSION: 1 TIME: Tue Jun 14 09:07:44 2011

RD ILLUMINA-E6F4B9:7:114:3274:6782#0/1 21 0 0
CATTCGCCGTGTGAACACGGA

QA 1 21 1 21
DS VERSION: 1 TIME: Tue Jun 14 09:07:44 2011

RD ILLUMINA-E6F4B9:7:114:18601:13143#0/1 22 0 0
ACGGAAACCTATATTGTGAGTG

QA 1 22 1 22
DS VERSION: 1 TIME: Tue Jun 14 09:07:44 2011

RD ILLUMINA-E6F4B9:7:37:11458:3406#0/1 22 0 0
ATTGTTGGGAGCATGACGGACA

QA 1 22 3 22
DS VERSION: 1 TIME: Tue Jun 14 09:07:44 2011

RD ILLUMINA-E6F4B9:7:67:2121:19876#0/1 22 0 0
ATTGTTGGGAGCATGACGGACA

QA 1 22 3 22
DS VERSION: 1 TIME: Tue Jun 14 09:07:44 2011

RD ILLUMINA-E6F4B9:7:15:9082:18507#0/1 23 0 0
TGTTGGGAGCATGACGGACAGTG

QA 1 23 1 23
DS VERSION: 1 TIME: Tue Jun 14 09:07:44 2011

RD ILLUMINA-E6F4B9:7:9:4981:18312#0/1 24 0 0
GGGAGCATGACGGACAGTGCAGGG

QA 1 24 1 24
DS VERSION: 1 TIME: Tue Jun 14 09:07:44 2011

RD ILLUMINA-E6F4B9:7:72:17026:3469#0/1 21 0 0
AGCATGACGGACAGTGCAGGG

QA 1 21 3 21
DS VERSION: 1 TIME: Tue Jun 14 09:07:44 2011

RD ILLUMINA-E6F4B9:7:65:2048:4036#0/1 21 0 0
CATGACGGACAGTGCAGGGGG

QA 1 21 1 21
DS VERSION: 1 TIME: Tue Jun 14 09:07:44 2011

RD ILLUMINA-E6F4B9:7:113:11018:16892#0/1 21 0 0
CATGACGGACAGTGCAGGGGG

QA 1 21 1 21
DS VERSION: 1 TIME: Tue Jun 14 09:07:44 2011

RD ILLUMINA-E6F4B9:7:30:5830:12428#0/1 22 0 0
ATGACGGACAGTGCAGGGGGAA

QA 1 22 1 22
DS VERSION: 1 TIME: Tue Jun 14 09:07:44 2011

RD ILLUMINA-E6F4B9:7:69:10848:12388#0/1 21 0 0
ATGACGGACAGTGCAGGGGGA

QA 1 21 1 21
DS VERSION: 1 TIME: Tue Jun 14 09:07:44 2011

RD ILLUMINA-E6F4B9:7:105:16256:4991#0/1 19 0 0
ATGACGGACAGTGCAGGGG

QA 1 19 1 19
DS VERSION: 1 TIME: Tue Jun 14 09:07:44 2011

RD ILLUMINA-E6F4B9:7:106:1490:6350#0/1 21 0 0
ATGACGGACAGTGCAGGGGGA

QA 1 21 1 21
DS VERSION: 1 TIME: Tue Jun 14 09:07:44 2011

RD ILLUMINA-E6F4B9:7:28:3561:16863#0/1 19 0 0
TGACGGACAGTGCAGGGGT

QA 1 19 1 18
DS VERSION: 1 TIME: Tue Jun 14 09:07:44 2011

RD ILLUMINA-E6F4B9:7:10:15872:16634#0/1 25 0 0
GACGGACAGTGCAGGGGGAAAAAAC

QA 1 25 1 25
DS VERSION: 1 TIME: Tue Jun 14 09:07:44 2011

RD ILLUMINA-E6F4B9:7:84:15756:20007#0/1 20 0 0
GACGGACAGTGCAGGGGGAA

QA 1 20 1 20
DS VERSION: 1 TIME: Tue Jun 14 09:07:44 2011

RD ILLUMINA-E6F4B9:7:103:17213:3521#0/1 25 0 0
ACGGACAGTGCAGGGGGAAAAAACT

QA 1 25 1 25
DS VERSION: 1 TIME: Tue Jun 14 09:07:44 2011

RD ILLUMINA-E6F4B9:7:12:6728:2873#0/1 23 0 0
CGGACAGTGCAGGGGGAAAAAAC

QA 1 23 1 23
DS VERSION: 1 TIME: Tue Jun 14 09:07:44 2011

RD ILLUMINA-E6F4B9:7:30:7114:1778#0/1 22 0 0
CGACAGTGCAGGGGGAAGAAAC

QA 1 22 2 22
DS VERSION: 1 TIME: Tue Jun 14 09:07:44 2011

RD ILLUMINA-E6F4B9:7:75:15431:4755#0/1 21 0 0
AGTGCAGGGGGAAAAAACTGG

QA 1 21 1 21
DS VERSION: 1 TIME: Tue Jun 14 09:07:44 2011

RD ILLUMINA-E6F4B9:7:107:19572:14489#0/1 19 0 0
GTGCAGGGGGAAAAAACTG

QA 1 19 1 19
DS VERSION: 1 TIME: Tue Jun 14 09:07:44 2011

RD ILLUMINA-E6F4B9:7:60:14677:14060#0/1 28 0 0
CAGGGGGAAAGGACTGGATTTGGGAGAG

QA 1 28 1 27
DS VERSION: 1 TIME: Tue Jun 14 09:07:44 2011

RD ILLUMINA-E6F4B9:7:54:7373:5491#0/1 21 0 0
GGGGGAAAAAACTGGATTTGG

QA 1 21 1 21
DS VERSION: 1 TIME: Tue Jun 14 09:07:44 2011

RD ILLUMINA-E6F4B9:7:33:6153:17782#0/1 25 0 0
GGAAAAAACTGGATTTGGGAGAATC

QA 1 25 1 25
DS VERSION: 1 TIME: Tue Jun 14 09:07:44 2011

RD ILLUMINA-E6F4B9:7:61:6765:3293#0/1 22 0 0
GGAAAAAACTGGATTTGGGAGA

QA 1 22 1 22
DS VERSION: 1 TIME: Tue Jun 14 09:07:44 2011

RD ILLUMINA-E6F4B9:7:56:16342:9711#0/1 23 0 0
GAAAAAACTGGATTTGGGAGAAT

QA 1 23 1 23
DS VERSION: 1 TIME: Tue Jun 14 09:07:44 2011

RD ILLUMINA-E6F4B9:7:80:5471:2564#0/1 23 0 0
GAAAAAACTGGATTTGGGAGAAT

QA 1 23 1 23
DS VERSION: 1 TIME: Tue Jun 14 09:07:44 2011

RD ILLUMINA-E6F4B9:7:3:15943:9190#0/1 23 0 0
AAAAAACTGGATTTGGGAGAATC

QA 1 23 1 23
DS VERSION: 1 TIME: Tue Jun 14 09:07:44 2011

RD ILLUMINA-E6F4B9:7:31:14438:9970#0/1 21 0 0
AAAAAACTGGATTTGGGAGAA

QA 1 21 1 21
DS VERSION: 1 TIME: Tue Jun 14 09:07:44 2011

RD ILLUMINA-E6F4B9:7:58:19061:10589#0/1 24 0 0
AAAAACTGGATTTGGGAGAATCTC

QA 1 24 1 22
DS VERSION: 1 TIME: Tue Jun 14 09:07:44 2011

RD ILLUMINA-E6F4B9:7:64:7477:8098#0/1 22 0 0
AAAAACTGGATTTGGGAGAATC

QA 1 22 1 22
DS VERSION: 1 TIME: Tue Jun 14 09:07:44 2011

RD ILLUMINA-E6F4B9:7:72:3329:4283#0/1 22 0 0
AAAAACTGGATTTGGGAGAATC

QA 1 22 1 22
DS VERSION: 1 TIME: Tue Jun 14 09:07:44 2011

RD ILLUMINA-E6F4B9:7:94:9365:5546#0/1 22 0 0
AAAAACTGGATTTGGGAGAATC

QA 1 22 1 22
DS VERSION: 1 TIME: Tue Jun 14 09:07:44 2011

RD ILLUMINA-E6F4B9:7:113:11557:5210#0/1 21 0 0
AAAAACTGGATTTGGGAGAAT

QA 1 21 1 21
DS VERSION: 1 TIME: Tue Jun 14 09:07:44 2011

RD ILLUMINA-E6F4B9:7:1:14890:3711#0/1 21 0 0
AAAACTGGATTTGGGAGAATC

QA 1 21 1 21
DS VERSION: 1 TIME: Tue Jun 14 09:07:44 2011

RD ILLUMINA-E6F4B9:7:5:8081:8365#0/1 21 0 0
AAAACTGGATTTGGGAGAATC

QA 1 21 1 21
DS VERSION: 1 TIME: Tue Jun 14 09:07:44 2011

RD ILLUMINA-E6F4B9:7:35:13761:19485#0/1 24 0 0
AAAACTGGATTTGGGAGAATCAAT

QA 1 24 1 23
DS VERSION: 1 TIME: Tue Jun 14 09:07:44 2011

RD ILLUMINA-E6F4B9:7:36:15890:18390#0/1 21 0 0
AAAACTGGATTTGGGAGAATC

QA 1 21 1 21
DS VERSION: 1 TIME: Tue Jun 14 09:07:44 2011

RD ILLUMINA-E6F4B9:7:52:5149:18069#0/1 21 0 0
AAAACTGGATTTGGGAGAATC

QA 1 21 1 21
DS VERSION: 1 TIME: Tue Jun 14 09:07:44 2011

RD ILLUMINA-E6F4B9:7:63:15662:4810#0/1 21 0 0
AAAACTGGATTTGGGAGAATC

QA 1 21 1 21
DS VERSION: 1 TIME: Tue Jun 14 09:07:44 2011

RD ILLUMINA-E6F4B9:7:64:11244:2111#0/1 21 0 0
AAAACTGGATTTGGGAGAATC

QA 1 21 1 21
DS VERSION: 1 TIME: Tue Jun 14 09:07:44 2011

RD ILLUMINA-E6F4B9:7:117:17024:8973#0/1 20 0 0
AAAACTGGATTTGGGAGAAT

QA 1 20 1 20
DS VERSION: 1 TIME: Tue Jun 14 09:07:44 2011

RD ILLUMINA-E6F4B9:7:6:6678:20521#0/1 18 0 0
ACAAACTGGATTTGGGAG

QA 1 18 3 18
DS VERSION: 1 TIME: Tue Jun 14 09:07:44 2011

RD ILLUMINA-E6F4B9:7:14:15034:16102#0/1 20 0 0
AAACTGGATTTGGGAGAATC

QA 1 20 1 20
DS VERSION: 1 TIME: Tue Jun 14 09:07:44 2011

RD ILLUMINA-E6F4B9:7:20:4660:17326#0/1 24 0 0
AAACTGGATTTGGGAGAATCAATT

QA 1 24 1 22
DS VERSION: 1 TIME: Tue Jun 14 09:07:44 2011

RD ILLUMINA-E6F4B9:7:42:11192:7076#0/1 20 0 0
AAACTGGATTTGGGAGAATC

QA 1 20 1 20
DS VERSION: 1 TIME: Tue Jun 14 09:07:44 2011

RD ILLUMINA-E6F4B9:7:46:17529:3175#0/1 20 0 0
AAACTGGATTTGGGAGAATC

QA 1 20 1 20
DS VERSION: 1 TIME: Tue Jun 14 09:07:44 2011

RD ILLUMINA-E6F4B9:7:46:7357:13232#0/1 20 0 0
AAACTGGATTTGGGAGAATC

QA 1 20 1 20
DS VERSION: 1 TIME: Tue Jun 14 09:07:44 2011

RD ILLUMINA-E6F4B9:7:47:14208:11920#0/1 20 0 0
AAACTGGATTTGGGAGAATC

QA 1 20 1 20
DS VERSION: 1 TIME: Tue Jun 14 09:07:44 2011

RD ILLUMINA-E6F4B9:7:49:15822:11480#0/1 19 0 0
AAACTGGATTTGGGAGAAT

QA 1 19 1 19
DS VERSION: 1 TIME: Tue Jun 14 09:07:44 2011

RD ILLUMINA-E6F4B9:7:68:5553:8478#0/1 20 0 0
AAACTGGATTTGGGAGAATC

QA 1 20 1 20
DS VERSION: 1 TIME: Tue Jun 14 09:07:44 2011

RD ILLUMINA-E6F4B9:7:87:9616:9261#0/1 18 0 0
AAACTGGATTTGGGAGAA

QA 1 18 1 18
DS VERSION: 1 TIME: Tue Jun 14 09:07:44 2011

RD ILLUMINA-E6F4B9:7:87:14783:18282#0/1 20 0 0
AAACTGGATTTGGGAGAATC

QA 1 20 1 20
DS VERSION: 1 TIME: Tue Jun 14 09:07:44 2011

RD ILLUMINA-E6F4B9:7:91:11598:17205#0/1 21 0 0
AAACTGGATTTGGGAGAATCA

QA 1 21 1 21
DS VERSION: 1 TIME: Tue Jun 14 09:07:44 2011

RD ILLUMINA-E6F4B9:7:108:9790:15913#0/1 20 0 0
AAACTGGATTTGGGAGAATC

QA 1 20 1 20
DS VERSION: 1 TIME: Tue Jun 14 09:07:44 2011

RD ILLUMINA-E6F4B9:7:112:10833:20169#0/1 20 0 0
AAACTGGATTTGGGAGAATC

QA 1 20 1 20
DS VERSION: 1 TIME: Tue Jun 14 09:07:44 2011

RD ILLUMINA-E6F4B9:7:20:8039:2378#0/1 21 0 0
AACTGGATTTGGGAGAATCTC

QA 1 21 1 19
DS VERSION: 1 TIME: Tue Jun 14 09:07:44 2011

RD ILLUMINA-E6F4B9:7:27:16912:8449#0/1 19 0 0
AACTGGATTTGGGAGAATC

QA 1 19 1 19
DS VERSION: 1 TIME: Tue Jun 14 09:07:44 2011

RD ILLUMINA-E6F4B9:7:67:6415:12340#0/1 19 0 0
AACTGGATTTGGGAGAATC

QA 1 19 1 19
DS VERSION: 1 TIME: Tue Jun 14 09:07:44 2011

RD ILLUMINA-E6F4B9:7:95:14736:7015#0/1 19 0 0
AACTGGATTTGGGAGAATC

QA 1 19 1 19
DS VERSION: 1 TIME: Tue Jun 14 09:07:44 2011

RD ILLUMINA-E6F4B9:7:102:3133:2529#0/1 19 0 0
AACTGGATTTGGGAGAATC

QA 1 19 1 19
DS VERSION: 1 TIME: Tue Jun 14 09:07:44 2011

RD ILLUMINA-E6F4B9:7:116:8479:14586#0/1 18 0 0
AACTGGATTTGGGAGAAT

QA 1 18 1 18
DS VERSION: 1 TIME: Tue Jun 14 09:07:44 2011

RD ILLUMINA-E6F4B9:7:119:9233:8626#0/1 19 0 0
AACTGGATTTGGGAGAATC

QA 1 19 1 19
DS VERSION: 1 TIME: Tue Jun 14 09:07:44 2011

RD ILLUMINA-E6F4B9:7:34:3127:9538#0/1 22 0 0
GACTGGATTTGGGAGAATCGGT

QA 1 22 2 19
DS VERSION: 1 TIME: Tue Jun 14 09:07:44 2011

RD ILLUMINA-E6F4B9:7:3:8170:1597#0/1 18 0 0
ACTGGATTTGGGAGAATC

QA 1 18 1 18
DS VERSION: 1 TIME: Tue Jun 14 09:07:44 2011

RD ILLUMINA-E6F4B9:7:3:8474:19317#0/1 18 0 0
ACTGGATTTGGGAGAATC

QA 1 18 1 18
DS VERSION: 1 TIME: Tue Jun 14 09:07:44 2011

RD ILLUMINA-E6F4B9:7:27:18142:9968#0/1 18 0 0
ACTGGATTTGGGAGAATC

QA 1 18 1 18
DS VERSION: 1 TIME: Tue Jun 14 09:07:44 2011

RD ILLUMINA-E6F4B9:7:44:4864:7405#0/1 18 0 0
ACTGGATTTGGGAGAATC

QA 1 18 1 18
DS VERSION: 1 TIME: Tue Jun 14 09:07:44 2011

RD ILLUMINA-E6F4B9:7:48:10657:13031#0/1 18 0 0
ACTGGATTTGGGAGAATC

QA 1 18 1 18
DS VERSION: 1 TIME: Tue Jun 14 09:07:44 2011

RD ILLUMINA-E6F4B9:7:55:1541:11703#0/1 18 0 0
ACTGGATTTGGGAGAATC

QA 1 18 1 18
DS VERSION: 1 TIME: Tue Jun 14 09:07:44 2011

RD ILLUMINA-E6F4B9:7:61:9477:17203#0/1 26 0 0
ACTGGATTTGGGAGAATCAATTGGAG

QA 1 26 1 25
DS VERSION: 1 TIME: Tue Jun 14 09:07:44 2011

RD ILLUMINA-E6F4B9:7:68:4881:18662#0/1 21 0 0
ACTGGATTTGGGAGAATCAAT

QA 1 21 1 20
DS VERSION: 1 TIME: Tue Jun 14 09:07:44 2011

RD ILLUMINA-E6F4B9:7:36:2937:4084#0/1 26 0 0
AGGATTTGGGAGAATCAATTGGAGTC

QA 1 26 2 23
DS VERSION: 1 TIME: Tue Jun 14 09:07:44 2011

RD ILLUMINA-E6F4B9:7:25:2823:3218#0/1 26 0 0
GAATCAATTGGAGTCGAAGGAAGATT

QA 1 26 1 26
DS VERSION: 1 TIME: Tue Jun 14 09:07:44 2011

RD ILLUMINA-E6F4B9:7:23:4992:20522#0/1 25 0 0
TGGAGTCGAAGGAAGATTGGCCAAC

QA 1 25 1 25
DS VERSION: 1 TIME: Tue Jun 14 09:07:44 2011

RD ILLUMINA-E6F4B9:7:107:18086:3799#0/1 22 0 0
TGGAATGGAAGGAAGATTGGAG

QA 1 22 1 20
DS VERSION: 1 TIME: Tue Jun 14 09:07:44 2011

RD ILLUMINA-E6F4B9:7:90:10054:7730#0/1 29 0 0
CGAAGGAAGATTGGCCAACGATAACCAAC

QA 1 29 1 29
DS VERSION: 1 TIME: Tue Jun 14 09:07:44 2011

RD ILLUMINA-E6F4B9:7:117:9853:2672#0/1 23 0 0
CGAAGGAAGATTGGCCAACGATA

QA 1 23 1 23
DS VERSION: 1 TIME: Tue Jun 14 09:07:44 2011

RD ILLUMINA-E6F4B9:7:14:3774:11048#0/1 21 0 0
GAAGGAAGATTGGCCAACGAT

QA 1 21 1 21
DS VERSION: 1 TIME: Tue Jun 14 09:07:44 2011

RD ILLUMINA-E6F4B9:7:65:1030:19337#0/1 29 0 0
NTTGGCCAACGATAACCAACAACCAGGGC

QA 1 29 2 29
DS VERSION: 1 TIME: Tue Jun 14 09:07:44 2011

RD ILLUMINA-E6F4B9:7:40:18117:15603#0/1 28 0 0
GATAACCAACAACCAGGGCTCTCAGATT

QA 1 28 1 28
DS VERSION: 1 TIME: Tue Jun 14 09:07:44 2011

RD ILLUMINA-E6F4B9:7:13:19545:18173#0/1 24 0 0
ATAACCAACAACCAGGGCTCTCAG

QA 1 24 1 24
DS VERSION: 1 TIME: Tue Jun 14 09:07:44 2011

RD ILLUMINA-E6F4B9:7:18:17061:19656#0/1 23 0 0
TAACCAACAACCAGGGCTCTCAG

QA 1 23 1 23
DS VERSION: 1 TIME: Tue Jun 14 09:07:44 2011

RD ILLUMINA-E6F4B9:7:46:13165:3460#0/1 24 0 0
TAACCAACAACCAGGGCTCTCAGA

QA 1 24 1 24
DS VERSION: 1 TIME: Tue Jun 14 09:07:44 2011

RD ILLUMINA-E6F4B9:7:58:5634:7622#0/1 18 0 0
TAACCAACAACCAGGGCT

QA 1 18 1 18
DS VERSION: 1 TIME: Tue Jun 14 09:07:44 2011

RD ILLUMINA-E6F4B9:7:72:3861:7542#0/1 23 0 0
TAACCAACAACCAGGGCTCTCAG

QA 1 23 1 23
DS VERSION: 1 TIME: Tue Jun 14 09:07:44 2011

RD ILLUMINA-E6F4B9:7:106:6089:13109#0/1 23 0 0
TAACCAACAACCAGGGCTCTCAG

QA 1 23 1 23
DS VERSION: 1 TIME: Tue Jun 14 09:07:44 2011

RD ILLUMINA-E6F4B9:7:109:7593:4255#0/1 22 0 0
AAACCAACAACCAGGGCTCTCA

QA 1 22 2 22
DS VERSION: 1 TIME: Tue Jun 14 09:07:44 2011

RD ILLUMINA-E6F4B9:7:76:8387:5465#0/1 21 0 0
CCAACAACCAGGGCTCTCAGA

QA 1 21 1 21
DS VERSION: 1 TIME: Tue Jun 14 09:07:44 2011

RD ILLUMINA-E6F4B9:7:7:8543:18045#0/1 23 0 0
ACAACCAGGGCTCTCAGATTTAT

QA 1 23 1 20
DS VERSION: 1 TIME: Tue Jun 14 09:07:44 2011

RD ILLUMINA-E6F4B9:7:93:9555:19828#0/1 21 0 0
TATTGCACCGAGACAATACAT

QA 1 21 1 21
DS VERSION: 1 TIME: Tue Jun 14 09:07:44 2011

RD ILLUMINA-E6F4B9:7:26:10907:20854#0/1 22 0 0
CGAGACAATACATCTTGCAACT

QA 1 22 1 22
DS VERSION: 1 TIME: Tue Jun 14 09:07:44 2011

RD ILLUMINA-E6F4B9:7:40:7972:16203#0/1 22 0 0
ATCTTGCAACTGCAGTTCAACC

QA 1 22 1 22
DS VERSION: 1 TIME: Tue Jun 14 09:07:44 2011

RD ILLUMINA-E6F4B9:7:3:11131:15834#0/1 21 0 0
CTTGCAACTGCAGTTCAACCG

QA 1 21 1 21
DS VERSION: 1 TIME: Tue Jun 14 09:07:44 2011

RD ILLUMINA-E6F4B9:7:60:2574:21036#0/1 23 0 0
CTTGCAACTGCAGTTCAACCGGA

QA 1 23 1 23
DS VERSION: 1 TIME: Tue Jun 14 09:07:44 2011

RD ILLUMINA-E6F4B9:7:10:19617:9353#0/1 21 0 0
TGCAACTGCAGTTCAACCGGA

QA 1 21 1 21
DS VERSION: 1 TIME: Tue Jun 14 09:07:44 2011

RD ILLUMINA-E6F4B9:7:105:19247:11552#0/1 21 0 0
CAACTGCAGTTCAACCGGAAA

QA 1 21 1 21
DS VERSION: 1 TIME: Tue Jun 14 09:07:44 2011

RD ILLUMINA-E6F4B9:7:115:15404:9187#0/1 20 0 0
TGCAGTTCAACCGGAAAGGA

QA 1 20 1 20
DS VERSION: 1 TIME: Tue Jun 14 09:07:44 2011

RD ILLUMINA-E6F4B9:7:16:15345:1252#0/1 29 0 0
CAGTTCAACCGGAAAGGAGAGTCATCGAT

QA 1 29 1 29
DS VERSION: 1 TIME: Tue Jun 14 09:07:44 2011

RD ILLUMINA-E6F4B9:7:105:16171:11975#0/1 29 0 0
CAGTTCAACCGGAAAGGAGAGTCATCGAT

QA 1 29 1 29
DS VERSION: 1 TIME: Tue Jun 14 09:07:44 2011

RD ILLUMINA-E6F4B9:7:57:6737:12623#0/1 26 0 0
CAACCGGAAAGGAGAGTCATCGATCG

QA 1 26 1 26
DS VERSION: 1 TIME: Tue Jun 14 09:07:44 2011

RD ILLUMINA-E6F4B9:7:65:15697:9884#0/1 21 0 0
CGGAAAGGAGAGTCATCGATC

QA 1 21 1 21
DS VERSION: 1 TIME: Tue Jun 14 09:07:44 2011

RD ILLUMINA-E6F4B9:7:42:4595:4495#0/1 28 0 0
GAAAGGAGAGTCATCGATCGAGAAGGAT

QA 1 28 1 25
DS VERSION: 1 TIME: Tue Jun 14 09:07:44 2011

RD ILLUMINA-E6F4B9:7:68:2042:16964#0/1 22 0 0
GAGAGTCATCGATCGAGAAGAG

QA 1 22 1 21
DS VERSION: 1 TIME: Tue Jun 14 09:07:44 2011

RD ILLUMINA-E6F4B9:7:100:19442:16012#0/1 21 0 0
AGAGTCATCGATCGAGAAGAT

QA 1 21 1 21
DS VERSION: 1 TIME: Tue Jun 14 09:07:44 2011

RD ILLUMINA-E6F4B9:7:29:9425:11213#0/1 21 0 0
GAGTCATCGATCGAGAAGATT

QA 1 21 1 21
DS VERSION: 1 TIME: Tue Jun 14 09:07:44 2011

RD ILLUMINA-E6F4B9:7:57:6619:11092#0/1 21 0 0
AGTCATCGATCGAGAAGATTA

QA 1 21 1 21
DS VERSION: 1 TIME: Tue Jun 14 09:07:44 2011

RD ILLUMINA-E6F4B9:7:5:11236:1503#0/1 21 0 0
TCGATCGAGAAGATTACGTCA

QA 1 21 1 21
DS VERSION: 1 TIME: Tue Jun 14 09:07:44 2011

RD ILLUMINA-E6F4B9:7:111:14491:1519#0/1 26 0 0
TCGATCGAGAAGATTACGTCAAGGAT

QA 1 26 1 23
DS VERSION: 1 TIME: Tue Jun 14 09:07:44 2011

RD ILLUMINA-E6F4B9:7:74:3236:9507#0/1 21 0 0
CGATCGAGAAGATTACGTCAA

QA 1 21 1 21
DS VERSION: 1 TIME: Tue Jun 14 09:07:44 2011

RD ILLUMINA-E6F4B9:7:65:11861:17353#0/1 18 0 0
AGAAGATTACGTCAAGGA

QA 1 18 1 16
DS VERSION: 1 TIME: Tue Jun 14 09:07:44 2011

RD ILLUMINA-E6F4B9:7:12:16920:17135#0/1 25 0 0
GAAGATTACGTCAAGGATTTCGCTG

QA 1 25 1 25
DS VERSION: 1 TIME: Tue Jun 14 09:07:44 2011

RD ILLUMINA-E6F4B9:7:30:5178:7873#0/1 26 0 0
GAAGATTACGTCAAGGATTTCGCTGG

QA 1 26 1 26
DS VERSION: 1 TIME: Tue Jun 14 09:07:44 2011

RD ILLUMINA-E6F4B9:7:77:7489:12769#0/1 26 0 0
GAAGATTACGTCAAGGATTTCGCTGG

QA 1 26 1 26
DS VERSION: 1 TIME: Tue Jun 14 09:07:44 2011

RD ILLUMINA-E6F4B9:7:105:7151:14187#0/1 28 0 0
GAAGATTACGTCAAGGATTTCGCTGGTC

QA 1 28 1 28
DS VERSION: 1 TIME: Tue Jun 14 09:07:44 2011

RD ILLUMINA-E6F4B9:7:4:13801:14836#0/1 26 0 0
GATTACGTCCAGGATTTCGCTGGTCA

QA 1 26 1 26
DS VERSION: 1 TIME: Tue Jun 14 09:07:44 2011

RD ILLUMINA-E6F4B9:7:16:8937:3839#0/1 28 0 0
GATTACGTCAAGGATTTCGCTGGTCAAA

QA 1 28 1 28
DS VERSION: 1 TIME: Tue Jun 14 09:07:44 2011

RD ILLUMINA-E6F4B9:7:102:18197:7663#0/1 30 0 0
GATTACGTCAAGGATTTCGCTGGTCAAACC

QA 1 30 1 30
DS VERSION: 1 TIME: Tue Jun 14 09:07:44 2011

RD ILLUMINA-E6F4B9:7:6:8912:6470#0/1 23 0 0
ATTACGTCAAGGATTTCGCTGGT

QA 1 23 1 23
DS VERSION: 1 TIME: Tue Jun 14 09:07:44 2011

RD ILLUMINA-E6F4B9:7:67:8001:12623#0/1 24 0 0
ATTACGTCAAGGATTTCGCTGGTC

QA 1 24 1 24
DS VERSION: 1 TIME: Tue Jun 14 09:07:44 2011

RD ILLUMINA-E6F4B9:7:91:13461:11661#0/1 24 0 0
ATTACGTCAAGGATTTCGCTGGTC

QA 1 24 1 24
DS VERSION: 1 TIME: Tue Jun 14 09:07:44 2011

RD ILLUMINA-E6F4B9:7:68:17666:19181#0/1 23 0 0
TACGTCAAGGATTTCGCTGGTCA

QA 1 23 1 23
DS VERSION: 1 TIME: Tue Jun 14 09:07:44 2011

RD ILLUMINA-E6F4B9:7:91:17589:5316#0/1 26 0 0
GTCAAGGATTTCGCTGGTCAAACCGT

QA 1 26 1 26
DS VERSION: 1 TIME: Tue Jun 14 09:07:44 2011

RD ILLUMINA-E6F4B9:7:63:15651:17550#0/1 26 0 0
TTTCGCTGGTCAAACCGTTGGTGACC

QA 1 26 1 26
DS VERSION: 1 TIME: Tue Jun 14 09:07:44 2011

RD ILLUMINA-E6F4B9:7:15:15793:13898#0/1 24 0 0
TTCGCTGGTCAAACCGTTGGTGAC

QA 1 24 1 24
DS VERSION: 1 TIME: Tue Jun 14 09:07:44 2011

RD ILLUMINA-E6F4B9:7:1:16859:5208#0/1 21 0 0
TCGCTGGTCAAACCGTTGGTG

QA 1 21 1 21
DS VERSION: 1 TIME: Tue Jun 14 09:07:44 2011

RD ILLUMINA-E6F4B9:7:89:8069:7674#0/1 21 0 0
TCGCTGGTCAAACCGTTGGTG

QA 1 21 1 21
DS VERSION: 1 TIME: Tue Jun 14 09:07:44 2011

RD ILLUMINA-E6F4B9:7:18:12414:10696#0/1 21 0 0
GCTGGTCAAACCGTTGGTGAC

QA 1 21 1 21
DS VERSION: 1 TIME: Tue Jun 14 09:07:44 2011

RD ILLUMINA-E6F4B9:7:77:10677:1721#0/1 19 0 0
TGGTCAAACCGTTGGTGAC

QA 1 19 1 19
DS VERSION: 1 TIME: Tue Jun 14 09:07:44 2011

RD ILLUMINA-E6F4B9:7:46:6469:20028#0/1 22 0 0
CAAACCGTTGGTGACCTCTACA

QA 1 22 1 21
DS VERSION: 1 TIME: Tue Jun 14 09:07:44 2011

RD ILLUMINA-E6F4B9:7:94:10083:7919#0/1 24 0 0
AAACCGTTGGTGACCTCTACCCAC

QA 1 24 1 24
DS VERSION: 1 TIME: Tue Jun 14 09:07:44 2011

RD ILLUMINA-E6F4B9:7:23:12876:13078#0/1 22 0 0
AACCGTTGGTGACCTCTACCCT

QA 1 22 1 21
DS VERSION: 1 TIME: Tue Jun 14 09:07:44 2011

RD ILLUMINA-E6F4B9:7:26:11945:5103#0/1 24 0 0
AACCGTTGGTGACCTCTACCCACA

QA 1 24 1 24
DS VERSION: 1 TIME: Tue Jun 14 09:07:44 2011

RD ILLUMINA-E6F4B9:7:45:2348:7373#0/1 20 0 0
AACCGTTGGTGACCTCTACC

QA 1 20 1 20
DS VERSION: 1 TIME: Tue Jun 14 09:07:44 2011

RD ILLUMINA-E6F4B9:7:46:13799:14706#0/1 23 0 0
AACCGTTGGTGACCTCTACCCAC

QA 1 23 1 23
DS VERSION: 1 TIME: Tue Jun 14 09:07:44 2011

RD ILLUMINA-E6F4B9:7:86:4936:2005#0/1 20 0 0
AACCGTTGGTGACCTCTACC

QA 1 20 1 20
DS VERSION: 1 TIME: Tue Jun 14 09:07:44 2011

RD ILLUMINA-E6F4B9:7:90:16444:11962#0/1 20 0 0
AACCGTTGGTGACCTCTACC

QA 1 20 1 20
DS VERSION: 1 TIME: Tue Jun 14 09:07:44 2011

RD ILLUMINA-E6F4B9:7:114:7798:12255#0/1 20 0 0
AACCGTTGGTGACCTCTACC

QA 1 20 1 20
DS VERSION: 1 TIME: Tue Jun 14 09:07:44 2011

RD ILLUMINA-E6F4B9:7:115:8585:1206#0/1 22 0 0
AACCGGTGGTGACCTCTACCCA

QA 1 22 1 22
DS VERSION: 1 TIME: Tue Jun 14 09:07:44 2011

RD ILLUMINA-E6F4B9:7:7:19184:12244#0/1 21 0 0
ACCCACAATTACAAGGCAGCA

QA 1 21 1 21
DS VERSION: 1 TIME: Tue Jun 14 09:07:44 2011

RD ILLUMINA-E6F4B9:7:50:8851:7029#0/1 25 0 0
AAGGCAGCACCGGAGCCTCTGAATC

QA 1 25 1 23
DS VERSION: 1 TIME: Tue Jun 14 09:07:44 2011

RD ILLUMINA-E6F4B9:7:59:4002:8664#0/1 25 0 0
AAGGCAGCACCGGAGCCTCTGAATC

QA 1 25 1 23
DS VERSION: 1 TIME: Tue Jun 14 09:07:44 2011

RD ILLUMINA-E6F4B9:7:32:5550:9106#0/1 25 0 0
AGGCAGCACCGGAGCCTCTGAATCA

QA 1 25 1 22
DS VERSION: 1 TIME: Tue Jun 14 09:07:44 2011

RD ILLUMINA-E6F4B9:7:58:5579:7121#0/1 23 0 0
AGGCAGCACCGGAGCCTCTGAAT

QA 1 23 1 22
DS VERSION: 1 TIME: Tue Jun 14 09:07:44 2011

RD ILLUMINA-E6F4B9:7:65:9259:9388#0/1 23 0 0
AGGCAGCACCGGAGCCTCTGAAT

QA 1 23 1 22
DS VERSION: 1 TIME: Tue Jun 14 09:07:44 2011

RD ILLUMINA-E6F4B9:7:11:12183:12853#0/1 28 0 0
CAGCACCGGAGCCTCTGAATCAATTGAT

QA 1 28 1 28
DS VERSION: 1 TIME: Tue Jun 14 09:07:44 2011

RD ILLUMINA-E6F4B9:7:12:2328:20436#0/1 28 0 0
CAGCACCGGAGCCTCTGAATCAATTGAT

QA 1 28 1 28
DS VERSION: 1 TIME: Tue Jun 14 09:07:44 2011

RD ILLUMINA-E6F4B9:7:40:12271:11956#0/1 28 0 0
CAGCACCGGAGCCTCTGAATCAATTGAT

QA 1 28 1 28
DS VERSION: 1 TIME: Tue Jun 14 09:07:44 2011

RD ILLUMINA-E6F4B9:7:49:12049:2993#0/1 23 0 0
CAGCACCGGAGCCTCTGAATCAA

QA 1 23 1 23
DS VERSION: 1 TIME: Tue Jun 14 09:07:44 2011

RD ILLUMINA-E6F4B9:7:76:9004:21262#0/1 28 0 0
CAGCACCGGAGCCTCTGAATCAATTGAT

QA 1 28 1 28
DS VERSION: 1 TIME: Tue Jun 14 09:07:44 2011

RD ILLUMINA-E6F4B9:7:120:11310:16994#0/1 19 0 0
AGCACCGGAGCCTCTGAAT

QA 1 19 1 18
DS VERSION: 1 TIME: Tue Jun 14 09:07:44 2011

RD ILLUMINA-E6F4B9:7:94:2303:16821#0/1 25 0 0
CACCGGAGCCTCTGAATCAATTGAT

QA 1 25 1 25
DS VERSION: 1 TIME: Tue Jun 14 09:07:44 2011

RD ILLUMINA-E6F4B9:7:71:15503:11214#0/1 23 0 0
CCGGAGCCTCTGAATCAATTGAT

QA 1 23 1 23
DS VERSION: 1 TIME: Tue Jun 14 09:07:44 2011

RD ILLUMINA-E6F4B9:7:31:17063:14618#0/1 28 0 0
CGGAGCCTCTGAATCAATTGATTTCGCA

QA 1 28 1 28
DS VERSION: 1 TIME: Tue Jun 14 09:07:44 2011

RD ILLUMINA-E6F4B9:7:43:12948:15532#0/1 23 0 0
CGGAGCCTCTGAATCAATTGATT

QA 1 23 1 23
DS VERSION: 1 TIME: Tue Jun 14 09:07:44 2011

RD ILLUMINA-E6F4B9:7:5:1662:3906#0/1 22 0 0
GAGCCTCTGAATCAATTGATTT

QA 1 22 1 22
DS VERSION: 1 TIME: Tue Jun 14 09:07:44 2011

RD ILLUMINA-E6F4B9:7:44:16665:19500#0/1 22 0 0
ATTGATTTCGCATTTCCAACTG

QA 1 22 1 22
DS VERSION: 1 TIME: Tue Jun 14 09:07:44 2011

RD ILLUMINA-E6F4B9:7:8:6108:7372#0/1 21 0 0
TTGATTTCGCATTTCCAACTG

QA 1 21 1 21
DS VERSION: 1 TIME: Tue Jun 14 09:07:44 2011

RD ILLUMINA-E6F4B9:7:111:1069:10971#0/1 21 0 0
TTGATTTCGCATTTCCAACTG

QA 1 21 1 21
DS VERSION: 1 TIME: Tue Jun 14 09:07:44 2011

RD ILLUMINA-E6F4B9:7:80:3240:8139#0/1 21 0 0
GATTTCGCATTTCCAACTGTT

QA 1 21 1 21
DS VERSION: 1 TIME: Tue Jun 14 09:07:44 2011

RD ILLUMINA-E6F4B9:7:32:15998:17670#0/1 24 0 0
TTTCCAACTGTTGGCTCGGGAAGC

QA 1 24 1 24
DS VERSION: 1 TIME: Tue Jun 14 09:07:44 2011

RD ILLUMINA-E6F4B9:7:110:15584:13117#0/1 24 0 0
TTTCCAACTGTTGGCTCAGGAAGC

QA 1 24 1 24
DS VERSION: 1 TIME: Tue Jun 14 09:07:44 2011

RD ILLUMINA-E6F4B9:7:44:19225:17332#0/1 22 0 0
TCCAACTGTTGGCTCAGGAAGC

QA 1 22 1 22
DS VERSION: 1 TIME: Tue Jun 14 09:07:44 2011

RD ILLUMINA-E6F4B9:7:108:8463:13910#0/1 22 0 0
TCCAACTGTTGGCTCAGGAAGC

QA 1 22 1 22
DS VERSION: 1 TIME: Tue Jun 14 09:07:44 2011

RD ILLUMINA-E6F4B9:7:60:10109:6816#0/1 27 0 0
AACTGTTGGCTCAGGAAGCTGGGAAAT

QA 1 27 1 27
DS VERSION: 1 TIME: Tue Jun 14 09:07:44 2011

RD ILLUMINA-E6F4B9:7:68:12689:8361#0/1 23 0 0
AACTGTTGGCTCAGGAAGCTGGG

QA 1 23 1 23
DS VERSION: 1 TIME: Tue Jun 14 09:07:44 2011

RD ILLUMINA-E6F4B9:7:111:4236:18750#0/1 28 0 0
AACTGTTGGCTCAGGAAGCTGGGAAATA

QA 1 28 1 28
DS VERSION: 1 TIME: Tue Jun 14 09:07:44 2011

RD ILLUMINA-E6F4B9:7:67:14941:18328#0/1 23 0 0
ACTGTTGGCTCAGGAAGCTGGGA

QA 1 23 1 23
DS VERSION: 1 TIME: Tue Jun 14 09:07:44 2011

RD ILLUMINA-E6F4B9:7:87:1946:17287#0/1 26 0 0
ACTGTTGGCTCAGGAAGCTGGGAAAT

QA 1 26 1 26
DS VERSION: 1 TIME: Tue Jun 14 09:07:44 2011

RD ILLUMINA-E6F4B9:7:113:11313:5030#0/1 21 0 0
ACTGTTGGCTCAGGAAGCTGG

QA 1 21 1 21
DS VERSION: 1 TIME: Tue Jun 14 09:07:44 2011

RD ILLUMINA-E6F4B9:7:49:9964:14515#0/1 21 0 0
CTGTTGGCTCAGGAAGCTGGG

QA 1 21 1 21
DS VERSION: 1 TIME: Tue Jun 14 09:07:44 2011

RD ILLUMINA-E6F4B9:7:82:5768:6506#0/1 21 0 0
CTGTTGGCTCAGGAAGCTGGG

QA 1 21 1 21
DS VERSION: 1 TIME: Tue Jun 14 09:07:44 2011

RD ILLUMINA-E6F4B9:7:112:10425:11748#0/1 21 0 0
TGTTGGCTCAGGAAGCTGGGA

QA 1 21 1 21
DS VERSION: 1 TIME: Tue Jun 14 09:07:44 2011

RD ILLUMINA-E6F4B9:7:12:15816:11280#0/1 23 0 0
GTTGGCTCAGGAAGCTGGGAAAT

QA 1 23 1 23
DS VERSION: 1 TIME: Tue Jun 14 09:07:44 2011

RD ILLUMINA-E6F4B9:7:48:12026:9273#0/1 24 0 0
CAGGAAGCTGGGAAATACTTGTAC

QA 1 24 1 24
DS VERSION: 1 TIME: Tue Jun 14 09:07:44 2011

RD ILLUMINA-E6F4B9:7:104:5921:15819#0/1 26 0 0
CAGGAAGCTGGGAAATACTTGTACGT

QA 1 26 1 26
DS VERSION: 1 TIME: Tue Jun 14 09:07:44 2011

RD ILLUMINA-E6F4B9:7:58:9428:4334#0/1 23 0 0
GGGAAATACTTGTACGTGAATCT

QA 1 23 1 23
DS VERSION: 1 TIME: Tue Jun 14 09:07:44 2011

RD ILLUMINA-E6F4B9:7:8:19503:8591#0/1 27 0 0
TGCGAAATACTTGTACGTGAATCTCAT

QA 1 27 4 26
DS VERSION: 1 TIME: Tue Jun 14 09:07:44 2011

RD ILLUMINA-E6F4B9:7:111:6324:3138#0/1 28 0 0
AAATACTTGTACGTGAATCTCACAAACA

QA 1 28 1 28
DS VERSION: 1 TIME: Tue Jun 14 09:07:44 2011

RD ILLUMINA-E6F4B9:7:34:16265:10753#0/1 21 0 0
AATACTTGTACGTGAATCTCA

QA 1 21 1 21
DS VERSION: 1 TIME: Tue Jun 14 09:07:44 2011

RD ILLUMINA-E6F4B9:7:110:14401:15901#0/1 21 0 0
AATACTTGTACGTGAATCTCA

QA 1 21 1 21
DS VERSION: 1 TIME: Tue Jun 14 09:07:44 2011

RD ILLUMINA-E6F4B9:7:23:4824:4737#0/1 22 0 0
ATACTTGTACGTGAATCTCACA

QA 1 22 1 22
DS VERSION: 1 TIME: Tue Jun 14 09:07:44 2011

RD ILLUMINA-E6F4B9:7:50:6719:18170#0/1 21 0 0
ACAAACATTTCGAGCCAAATA

QA 1 21 1 21
DS VERSION: 1 TIME: Tue Jun 14 09:07:44 2011

RD ILLUMINA-E6F4B9:7:76:10061:18157#0/1 21 0 0
ACAAACATTTCGAGCCAAATA

QA 1 21 1 21
DS VERSION: 1 TIME: Tue Jun 14 09:07:44 2011

RD ILLUMINA-E6F4B9:7:3:18412:19509#0/1 25 0 0
ACATTTCGAGCCAAATAATTCGGAA

QA 1 25 1 25
DS VERSION: 1 TIME: Tue Jun 14 09:07:44 2011

RD ILLUMINA-E6F4B9:7:110:5319:4714#0/1 25 0 0
GAAGAAGCTTATCAATCACATATTA

QA 1 25 1 25
DS VERSION: 1 TIME: Tue Jun 14 09:07:44 2011

RD ILLUMINA-E6F4B9:7:30:11581:17769#0/1 21 0 0
AGAAGCTTATCAATCACATAT

QA 1 21 1 21
DS VERSION: 1 TIME: Tue Jun 14 09:07:44 2011

RD ILLUMINA-E6F4B9:7:14:12448:10118#0/1 22 0 0
GAAGCTTATCAATCACATATTA

QA 1 22 1 22
DS VERSION: 1 TIME: Tue Jun 14 09:07:44 2011

RD ILLUMINA-E6F4B9:7:45:2383:19519#0/1 21 0 0
GAAGCTTATCAATCACATATT

QA 1 21 1 21
DS VERSION: 1 TIME: Tue Jun 14 09:07:44 2011

RD ILLUMINA-E6F4B9:7:119:7549:8156#0/1 21 0 0
GAAGCTTATCAATCACATATT

QA 1 21 1 21
DS VERSION: 1 TIME: Tue Jun 14 09:07:44 2011

RD ILLUMINA-E6F4B9:7:99:3871:18691#0/1 28 0 0
TTAGAAGTGTACGAAGACGATTATTCCC

QA 1 28 1 28
DS VERSION: 1 TIME: Tue Jun 14 09:07:44 2011

RD ILLUMINA-E6F4B9:7:64:17017:13722#0/1 27 0 0
TAGAAGTGTACGAAGACGATTATTCCC

QA 1 27 1 27
DS VERSION: 1 TIME: Tue Jun 14 09:07:44 2011

RD ILLUMINA-E6F4B9:7:1:15154:15355#0/1 21 0 0
AGTGTACGAAGACGATTATTC

QA 1 21 1 21
DS VERSION: 1 TIME: Tue Jun 14 09:07:44 2011

RD ILLUMINA-E6F4B9:7:120:15798:14589#0/1 21 0 0
GTACGAAGACGATTATTCCCC

QA 1 21 1 21
DS VERSION: 1 TIME: Tue Jun 14 09:07:44 2011

RD ILLUMINA-E6F4B9:7:34:17770:13802#0/1 19 0 0
ACGAAGACGATTATTCCCC

QA 1 19 1 19
DS VERSION: 1 TIME: Tue Jun 14 09:07:44 2011

RD ILLUMINA-E6F4B9:7:120:15209:19447#0/1 21 0 0
AGACGATTATTCCCCGAAGAA

QA 1 21 1 21
DS VERSION: 1 TIME: Tue Jun 14 09:07:44 2011

RD ILLUMINA-E6F4B9:7:92:13303:6922#0/1 21 0 0
GACGATTATTCCCCGAAGAAA

QA 1 21 1 21
DS VERSION: 1 TIME: Tue Jun 14 09:07:44 2011

RD ILLUMINA-E6F4B9:7:23:15940:16062#0/1 25 0 0
GATTATTCCCCGAAGAAACTATGGA

QA 1 25 1 25
DS VERSION: 1 TIME: Tue Jun 14 09:07:44 2011

RD ILLUMINA-E6F4B9:7:108:12143:17752#0/1 26 0 0
GATTATTCCCCGAAGAAACTATGGAT

QA 1 26 1 26
DS VERSION: 1 TIME: Tue Jun 14 09:07:44 2011

RD ILLUMINA-E6F4B9:7:17:10877:10143#0/1 22 0 0
ATTATTCCCCGAAGAAACTATG

QA 1 22 1 22
DS VERSION: 1 TIME: Tue Jun 14 09:07:44 2011

RD ILLUMINA-E6F4B9:7:86:2406:18383#0/1 23 0 0
TATTCCCCGAAGAAACTATGGAT

QA 1 23 1 23
DS VERSION: 1 TIME: Tue Jun 14 09:07:44 2011

RD ILLUMINA-E6F4B9:7:116:14466:1738#0/1 23 0 0
TATTCCCCGAAGAAACTATGGAT

QA 1 23 1 23
DS VERSION: 1 TIME: Tue Jun 14 09:07:44 2011

RD ILLUMINA-E6F4B9:7:34:14020:2318#0/1 26 0 0
ATTCCCCGAAGAAACTATGGATAATA

QA 1 26 1 26
DS VERSION: 1 TIME: Tue Jun 14 09:07:44 2011

RD ILLUMINA-E6F4B9:7:37:9011:1268#0/1 22 0 0
ATTCCCCGAAGAAACTATGGAT

QA 1 22 1 22
DS VERSION: 1 TIME: Tue Jun 14 09:07:44 2011

RD ILLUMINA-E6F4B9:7:71:19528:18257#0/1 21 0 0
GTTCCCCGAAGAAACTATGGA

QA 1 21 2 21
DS VERSION: 1 TIME: Tue Jun 14 09:07:44 2011

RD ILLUMINA-E6F4B9:7:110:4637:2444#0/1 26 0 0
TTCCCCGAAGAAACTATGGATAATAA

QA 1 26 1 26
DS VERSION: 1 TIME: Tue Jun 14 09:07:44 2011

RD ILLUMINA-E6F4B9:7:57:14818:1816#0/1 25 0 0
CCCCGAAGAAACTATGGATAATAAC

QA 1 25 1 25
DS VERSION: 1 TIME: Tue Jun 14 09:07:44 2011

RD ILLUMINA-E6F4B9:7:81:6663:17232#0/1 24 0 0
AACTATGGATAATAACGGGTCACA

QA 1 24 1 24
DS VERSION: 1 TIME: Tue Jun 14 09:07:44 2011

RD ILLUMINA-E6F4B9:7:13:8772:18088#0/1 26 0 0
CTATGGATAATAACGGGTCACAGGCA

QA 1 26 1 26
DS VERSION: 1 TIME: Tue Jun 14 09:07:44 2011

RD ILLUMINA-E6F4B9:7:3:14909:5330#0/1 20 0 0
TGGATAATAACGGGTCACAG

QA 1 20 1 20
DS VERSION: 1 TIME: Tue Jun 14 09:07:44 2011

RD ILLUMINA-E6F4B9:7:97:15380:18624#0/1 26 0 0
TGGATAATAACGGGTCACAGGCAAGC

QA 1 26 1 26
DS VERSION: 1 TIME: Tue Jun 14 09:07:44 2011

RD ILLUMINA-E6F4B9:7:22:5757:21257#0/1 21 0 0
ACAGGCAAGCACGACCGAAAT

QA 1 21 1 21
DS VERSION: 1 TIME: Tue Jun 14 09:07:44 2011

RD ILLUMINA-E6F4B9:7:118:9320:5823#0/1 28 0 0
GACGCTGTCAAAAGATGCGGTTTTAAAG

QA 1 28 2 28
DS VERSION: 1 TIME: Tue Jun 14 09:07:44 2011

RD ILLUMINA-E6F4B9:7:47:18569:6358#0/1 25 0 0
AAAAGATGCGGTTTTGAAGGCCCTC

QA 1 25 2 25
DS VERSION: 1 TIME: Tue Jun 14 09:07:44 2011

RD ILLUMINA-E6F4B9:7:19:17124:10609#0/1 27 0 0
GCGGTTTTGAAGGCCCTCCTAACAGCC

QA 1 27 1 27
DS VERSION: 1 TIME: Tue Jun 14 09:07:44 2011

RD ILLUMINA-E6F4B9:7:82:7964:21030#0/1 23 0 0
AAAGCCCTCCTAACAGCCCAAGC

QA 1 23 4 23
DS VERSION: 1 TIME: Tue Jun 14 09:07:44 2011

RD ILLUMINA-E6F4B9:7:63:7123:8028#0/1 21 0 0
GCCCTCCTAACAGCCCAAGCG

QA 1 21 1 21
DS VERSION: 1 TIME: Tue Jun 14 09:07:44 2011

RD ILLUMINA-E6F4B9:7:77:2091:1793#0/1 21 0 0
GCCCTCCTAACAGCCCAAGCG

QA 1 21 1 21
DS VERSION: 1 TIME: Tue Jun 14 09:07:44 2011

RD ILLUMINA-E6F4B9:7:84:11922:16158#0/1 20 0 0
GCCCTCCTAACAGCCCAAGC

QA 1 20 1 20
DS VERSION: 1 TIME: Tue Jun 14 09:07:44 2011

RD ILLUMINA-E6F4B9:7:87:4376:15804#0/1 21 0 0
ACTCCTAACAGCCCAAGCGAA

QA 1 21 2 21
DS VERSION: 1 TIME: Tue Jun 14 09:07:44 2011

RD ILLUMINA-E6F4B9:7:46:15988:17516#0/1 21 0 0
CTCCTAACAGCCCAAGCGAAA

QA 1 21 1 21
DS VERSION: 1 TIME: Tue Jun 14 09:07:44 2011

RD ILLUMINA-E6F4B9:7:57:11123:4961#0/1 24 0 0
CGAAACAGCCCAAGCGAAAATAAC

QA 1 24 4 24
DS VERSION: 1 TIME: Tue Jun 14 09:07:44 2011

RD ILLUMINA-E6F4B9:7:21:3296:17614#0/1 21 0 0
CAGCCCAAGCGAAAATAACAG

QA 1 21 1 21
DS VERSION: 1 TIME: Tue Jun 14 09:07:44 2011

RD ILLUMINA-E6F4B9:7:95:7461:2409#0/1 21 0 0
GCCCAAGCGAAAATAACAGAG

QA 1 21 1 21
DS VERSION: 1 TIME: Tue Jun 14 09:07:44 2011

RD ILLUMINA-E6F4B9:7:102:1901:18236#0/1 21 0 0
GCCCAAGCGAAAATAACAGAG

QA 1 21 1 21
DS VERSION: 1 TIME: Tue Jun 14 09:07:44 2011

RD ILLUMINA-E6F4B9:7:112:19589:8793#0/1 27 0 0
AAATAACAGAGATGGAGTTGATGGAAC

QA 1 27 1 27
DS VERSION: 1 TIME: Tue Jun 14 09:07:44 2011

RD ILLUMINA-E6F4B9:7:17:14524:11917#0/1 26 0 0
AATAACAGAGATGGAGTTGATGGAAC

QA 1 26 1 26
DS VERSION: 1 TIME: Tue Jun 14 09:07:44 2011

RD ILLUMINA-E6F4B9:7:74:4268:6472#0/1 20 0 0
AATAACAGAGATGGAGTTGA

QA 1 20 1 20
DS VERSION: 1 TIME: Tue Jun 14 09:07:44 2011

RD ILLUMINA-E6F4B9:7:92:16468:17211#0/1 26 0 0
AATAACAGAGATGGAGTTGATGGAAC

QA 1 26 1 26
DS VERSION: 1 TIME: Tue Jun 14 09:07:44 2011

RD ILLUMINA-E6F4B9:7:44:18893:9702#0/1 25 0 0
ATAACAGAGATGGAGTTGATGGAAC

QA 1 25 1 25
DS VERSION: 1 TIME: Tue Jun 14 09:07:44 2011

RD ILLUMINA-E6F4B9:7:80:11068:1636#0/1 25 0 0
ATAACAGAGATGGAGTTGATGGAAC

QA 1 25 1 25
DS VERSION: 1 TIME: Tue Jun 14 09:07:44 2011

RD ILLUMINA-E6F4B9:7:93:3564:19409#0/1 25 0 0
ATAACAGAGATGGAGTTGATGGAAC

QA 1 25 1 25
DS VERSION: 1 TIME: Tue Jun 14 09:07:44 2011

RD ILLUMINA-E6F4B9:7:97:4003:15874#0/1 25 0 0
ATAACAGAGATGGAGTTGATGGAAC

QA 1 25 1 25
DS VERSION: 1 TIME: Tue Jun 14 09:07:44 2011

RD ILLUMINA-E6F4B9:7:106:6893:8513#0/1 25 0 0
ATAACAGAGATGGAGTTGATGGAAC

QA 1 25 1 25
DS VERSION: 1 TIME: Tue Jun 14 09:07:44 2011

RD ILLUMINA-E6F4B9:7:107:17359:18039#0/1 25 0 0
ATAACAGAGATGGAGTTGATGGAAC

QA 1 25 1 25
DS VERSION: 1 TIME: Tue Jun 14 09:07:44 2011

RD ILLUMINA-E6F4B9:7:115:15165:15147#0/1 26 0 0
ATAACAGCGATGGAGTTGATGGAACT

QA 1 26 1 25
DS VERSION: 1 TIME: Tue Jun 14 09:07:44 2011

RD ILLUMINA-E6F4B9:7:27:11260:4954#0/1 24 0 0
TAACAGAGATGGAGTTGATGGAAC

QA 1 24 1 24
DS VERSION: 1 TIME: Tue Jun 14 09:07:44 2011

RD ILLUMINA-E6F4B9:7:48:3984:3387#0/1 24 0 0
TAACAGAGATGGAGTTGATGGAAC

QA 1 24 1 24
DS VERSION: 1 TIME: Tue Jun 14 09:07:44 2011

RD ILLUMINA-E6F4B9:7:54:5699:3095#0/1 24 0 0
TAACAGAGATGGAGTCGATGGAAC

QA 1 24 1 24
DS VERSION: 1 TIME: Tue Jun 14 09:07:44 2011

RD ILLUMINA-E6F4B9:7:55:13092:5528#0/1 24 0 0
TAACAGAGATGGAGTTGATGGAAC

QA 1 24 1 24
DS VERSION: 1 TIME: Tue Jun 14 09:07:44 2011

RD ILLUMINA-E6F4B9:7:78:12741:8256#0/1 24 0 0
TAACAGAGATGGAGTTGATGGAAC

QA 1 24 1 24
DS VERSION: 1 TIME: Tue Jun 14 09:07:44 2011

RD ILLUMINA-E6F4B9:7:83:19445:9542#0/1 24 0 0
TAACAGAGATGGAGTTGATGGAAC

QA 1 24 1 24
DS VERSION: 1 TIME: Tue Jun 14 09:07:44 2011

RD ILLUMINA-E6F4B9:7:3:13057:16443#0/1 23 0 0
AACAGAGATGGAGTTGATGGAAC

QA 1 23 1 23
DS VERSION: 1 TIME: Tue Jun 14 09:07:44 2011

RD ILLUMINA-E6F4B9:7:51:15097:8334#0/1 23 0 0
AACAGAGATGGAGTTGATGGAAC

QA 1 23 1 23
DS VERSION: 1 TIME: Tue Jun 14 09:07:44 2011

RD ILLUMINA-E6F4B9:7:39:4601:11029#0/1 22 0 0
ACAGAGATGGAGTTGATGGAAC

QA 1 22 1 22
DS VERSION: 1 TIME: Tue Jun 14 09:07:44 2011

RD ILLUMINA-E6F4B9:7:40:9116:17174#0/1 22 0 0
ACAGAGATGGAGTTGATGGAAC

QA 1 22 1 22
DS VERSION: 1 TIME: Tue Jun 14 09:07:44 2011

RD ILLUMINA-E6F4B9:7:66:4419:9987#0/1 22 0 0
ACAGAGATGGAGTTGATGGAAC

QA 1 22 1 22
DS VERSION: 1 TIME: Tue Jun 14 09:07:44 2011

RD ILLUMINA-E6F4B9:7:73:8662:21092#0/1 23 0 0
ACAGAGATGGAGTTGATGGAACT

QA 1 23 1 22
DS VERSION: 1 TIME: Tue Jun 14 09:07:44 2011

RD ILLUMINA-E6F4B9:7:84:1960:10092#0/1 22 0 0
ACAGAGATGGAGTTGATGGAAC

QA 1 22 1 22
DS VERSION: 1 TIME: Tue Jun 14 09:07:44 2011

RD ILLUMINA-E6F4B9:7:116:8636:1829#0/1 22 0 0
ACAGAGATGGAGTTGATGGAAC

QA 1 22 1 22
DS VERSION: 1 TIME: Tue Jun 14 09:07:44 2011

RD ILLUMINA-E6F4B9:7:111:17786:16429#0/1 24 0 0
TACCAGAGATGGAGTTGATGGAAC

QA 1 24 4 24
DS VERSION: 1 TIME: Tue Jun 14 09:07:44 2011

RD ILLUMINA-E6F4B9:7:48:18087:17040#0/1 22 0 0
CCAGAGATGGAGTTGATGGAAC

QA 1 22 2 22
DS VERSION: 1 TIME: Tue Jun 14 09:07:44 2011

RD ILLUMINA-E6F4B9:7:30:5214:19882#0/1 21 0 0
CAGAGATGGAGTTGATGGAAC

QA 1 21 1 21
DS VERSION: 1 TIME: Tue Jun 14 09:07:44 2011

RD ILLUMINA-E6F4B9:7:114:16486:11948#0/1 21 0 0
CAGAGATGGAGTTGATGGAAC

QA 1 21 1 21
DS VERSION: 1 TIME: Tue Jun 14 09:07:44 2011

RD ILLUMINA-E6F4B9:7:25:6310:12009#0/1 20 0 0
AGAGATGGAGTTGATGGAAC

QA 1 20 1 20
DS VERSION: 1 TIME: Tue Jun 14 09:07:44 2011

RD ILLUMINA-E6F4B9:7:60:8045:14758#0/1 20 0 0
AGAGATGGAGTTGATGGAAC

QA 1 20 1 20
DS VERSION: 1 TIME: Tue Jun 14 09:07:44 2011

RD ILLUMINA-E6F4B9:7:84:7640:10053#0/1 20 0 0
AGAGATGGAGTTGATGGAAC

QA 1 20 1 20
DS VERSION: 1 TIME: Tue Jun 14 09:07:44 2011

RD ILLUMINA-E6F4B9:7:85:7799:10337#0/1 20 0 0
AGAGATGGAGTTGATGGAAC

QA 1 20 1 20
DS VERSION: 1 TIME: Tue Jun 14 09:07:44 2011

RD ILLUMINA-E6F4B9:7:119:2461:2856#0/1 20 0 0
AGAGATGGAGTTGATGGAAC

QA 1 20 1 20
DS VERSION: 1 TIME: Tue Jun 14 09:07:44 2011

RD ILLUMINA-E6F4B9:7:57:18252:15093#0/1 19 0 0
GAGATGGAGTTGATGGAAC

QA 1 19 1 19
DS VERSION: 1 TIME: Tue Jun 14 09:07:44 2011

RD ILLUMINA-E6F4B9:7:68:3390:9463#0/1 19 0 0
GAGATGGAGTTGATGGAAC

QA 1 19 1 19
DS VERSION: 1 TIME: Tue Jun 14 09:07:44 2011

RD ILLUMINA-E6F4B9:7:98:15729:16565#0/1 19 0 0
GAGATGGAGTTGATGGAAC

QA 1 19 1 19
DS VERSION: 1 TIME: Tue Jun 14 09:07:44 2011

RD ILLUMINA-E6F4B9:7:99:10529:3124#0/1 19 0 0
GAGATGGAGTTGATGGAAC

QA 1 19 1 19
DS VERSION: 1 TIME: Tue Jun 14 09:07:44 2011

RD ILLUMINA-E6F4B9:7:116:14144:12873#0/1 28 0 0
GAGATGGAGTTGATGGAACGTGTATATC

QA 1 28 1 28
DS VERSION: 1 TIME: Tue Jun 14 09:07:44 2011

RD ILLUMINA-E6F4B9:7:48:13701:12184#0/1 20 0 0
AGATGGAGTTGATGGAACGT

QA 1 20 1 20
DS VERSION: 1 TIME: Tue Jun 14 09:07:44 2011

RD ILLUMINA-E6F4B9:7:8:6345:6523#0/1 23 0 0
GATGGAGTTGATGGAACGTGTAT

QA 1 23 1 23
DS VERSION: 1 TIME: Tue Jun 14 09:07:44 2011

RD ILLUMINA-E6F4B9:7:30:5163:1874#0/1 24 0 0
GATGGAGTTGATGGAACGTGTATA

QA 1 24 1 24
DS VERSION: 1 TIME: Tue Jun 14 09:07:44 2011

RD ILLUMINA-E6F4B9:7:64:10366:20676#0/1 23 0 0
TGGAGTTGATGGAACGTGTATAT

QA 1 23 1 23
DS VERSION: 1 TIME: Tue Jun 14 09:07:44 2011

RD ILLUMINA-E6F4B9:7:20:2727:10209#0/1 21 0 0
AGTTGATGGAACGTGTATATC

QA 1 21 1 21
DS VERSION: 1 TIME: Tue Jun 14 09:07:44 2011

RD ILLUMINA-E6F4B9:7:104:13531:8771#0/1 21 0 0
TGATGGAACGTGTATATCAAC

QA 1 21 1 21
DS VERSION: 1 TIME: Tue Jun 14 09:07:44 2011

RD ILLUMINA-E6F4B9:7:17:18792:9191#0/1 18 0 0
GATGGAACGTGTATATCA

QA 1 18 1 18
DS VERSION: 1 TIME: Tue Jun 14 09:07:44 2011

RD ILLUMINA-E6F4B9:7:97:10258:6869#0/1 24 0 0
TTGCCCAAAACAAGGACCAAGCAA

QA 1 24 1 24
DS VERSION: 1 TIME: Tue Jun 14 09:07:44 2011

RD ILLUMINA-E6F4B9:7:102:5936:14566#0/1 23 0 0
CCCAAAACAAGGACCAAGCAATC

QA 1 23 1 23
DS VERSION: 1 TIME: Tue Jun 14 09:07:44 2011

RD ILLUMINA-E6F4B9:7:71:7314:10929#0/1 21 0 0
CAAAACAAGGACCAAGCAATC

QA 1 21 1 21
DS VERSION: 1 TIME: Tue Jun 14 09:07:44 2011

RD ILLUMINA-E6F4B9:7:15:1766:15327#0/1 24 0 0
AAAACAAGGACCAAGCAATCAAAC

QA 1 24 1 24
DS VERSION: 1 TIME: Tue Jun 14 09:07:44 2011

RD ILLUMINA-E6F4B9:7:13:17835:14570#0/1 29 0 0
AAACAAGGACCAAGCAATCAAACCAATTC

QA 1 29 1 27
DS VERSION: 1 TIME: Tue Jun 14 09:07:44 2011

RD ILLUMINA-E6F4B9:7:72:12196:9345#0/1 23 0 0
AACAAGGACCAAGCAATCAAACC

QA 1 23 1 23
DS VERSION: 1 TIME: Tue Jun 14 09:07:44 2011

RD ILLUMINA-E6F4B9:7:74:17558:12172#0/1 18 0 0
AACAAGGACCAAGCAATC

QA 1 18 1 18
DS VERSION: 1 TIME: Tue Jun 14 09:07:44 2011

RD ILLUMINA-E6F4B9:7:91:15392:17062#0/1 23 0 0
AACAAGGACCAAGCAATCAAACC

QA 1 23 1 23
DS VERSION: 1 TIME: Tue Jun 14 09:07:44 2011

RD ILLUMINA-E6F4B9:7:20:2026:12439#0/1 20 0 0
GGACAAGGACCAAGCAATCA

QA 1 20 3 20
DS VERSION: 1 TIME: Tue Jun 14 09:07:44 2011

RD ILLUMINA-E6F4B9:7:30:5300:18627#0/1 24 0 0
ACAAGGACCAAGCAATCAAACCAA

QA 1 24 1 24
DS VERSION: 1 TIME: Tue Jun 14 09:07:44 2011

RD ILLUMINA-E6F4B9:7:45:2418:20290#0/1 22 0 0
ACAAGGACCAAGCAATCAAACC

QA 1 22 1 22
DS VERSION: 1 TIME: Tue Jun 14 09:07:44 2011

RD ILLUMINA-E6F4B9:7:70:1161:5188#0/1 24 0 0
CAAGGACCAAGCAATCAAACCTCG

QA 1 24 1 21
DS VERSION: 1 TIME: Tue Jun 14 09:07:44 2011

RD ILLUMINA-E6F4B9:7:82:10706:4177#0/1 25 0 0
CAATAAGAGAAAAAAATCAACCGAT

QA 1 25 1 25
DS VERSION: 1 TIME: Tue Jun 14 09:07:44 2011

RD ILLUMINA-E6F4B9:7:42:16753:17001#0/1 25 0 0
ATAAGAGAAAGAAATCAACCGATAC

QA 1 25 1 25
DS VERSION: 1 TIME: Tue Jun 14 09:07:44 2011

RD ILLUMINA-E6F4B9:7:18:10069:20965#0/1 21 0 0
GAAAGAAATCAACCGATACAA

QA 1 21 1 21
DS VERSION: 1 TIME: Tue Jun 14 09:07:44 2011

RD ILLUMINA-E6F4B9:7:45:12376:13406#0/1 22 0 0
GAAAGAAATCAACCGATACAAC

QA 1 22 1 22
DS VERSION: 1 TIME: Tue Jun 14 09:07:44 2011

RD ILLUMINA-E6F4B9:7:91:5072:14482#0/1 26 0 0
CAACCGATACAACAGAATCAAGCGGA

QA 1 26 1 26
DS VERSION: 1 TIME: Tue Jun 14 09:07:44 2011

RD ILLUMINA-E6F4B9:7:28:9557:15413#0/1 21 0 0
GATACAACAGAATCAAGCGGA

QA 1 21 1 21
DS VERSION: 1 TIME: Tue Jun 14 09:07:44 2011

RD ILLUMINA-E6F4B9:7:120:2881:9462#0/1 21 0 0
GATACAACAGAATCAAGCGGA

QA 1 21 1 21
DS VERSION: 1 TIME: Tue Jun 14 09:07:44 2011

RD ILLUMINA-E6F4B9:7:42:5080:16048#0/1 23 0 0
TACAACAGAATCAAGCGGATCCA

QA 1 23 1 23
DS VERSION: 1 TIME: Tue Jun 14 09:07:44 2011

RD ILLUMINA-E6F4B9:7:41:15581:8823#0/1 22 0 0
CAACAGAATCAAACGGATCCAA

QA 1 22 1 22
DS VERSION: 1 TIME: Tue Jun 14 09:07:44 2011

RD ILLUMINA-E6F4B9:7:95:8999:14372#0/1 23 0 0
ACAGAATCAAGCGGATCCAAAAA

QA 1 23 1 23
DS VERSION: 1 TIME: Tue Jun 14 09:07:44 2011

RD ILLUMINA-E6F4B9:7:36:8560:17884#0/1 23 0 0
AATAAAAGCAGCAATAATCAACA

QA 1 23 1 23
DS VERSION: 1 TIME: Tue Jun 14 09:07:44 2011

RD ILLUMINA-E6F4B9:7:114:15356:12182#0/1 21 0 0
AAGCAGCAATAATCAACAAAA

QA 1 21 1 21
DS VERSION: 1 TIME: Tue Jun 14 09:07:44 2011

RD ILLUMINA-E6F4B9:7:30:4702:14262#0/1 26 0 0
AACAAAATATTCAAGAACAAAGCAGT

QA 1 26 1 26
DS VERSION: 1 TIME: Tue Jun 14 09:07:44 2011

RD ILLUMINA-E6F4B9:7:49:2654:11989#0/1 22 0 0
TCAAGAACAAAGCAGTTCCAGC

QA 1 22 2 22
DS VERSION: 1 TIME: Tue Jun 14 09:07:44 2011

RD ILLUMINA-E6F4B9:7:68:3906:8054#0/1 23 0 0
AACAAAGCAGTTCCAGCATCACC

QA 1 23 1 23
DS VERSION: 1 TIME: Tue Jun 14 09:07:44 2011

RD ILLUMINA-E6F4B9:7:105:10742:3361#0/1 28 0 0
GACGCAGTCGATCTCGTCGACGGAGAGT

QA 1 28 8 28
DS VERSION: 1 TIME: Tue Jun 14 09:07:44 2011

RD ILLUMINA-E6F4B9:7:34:18815:16824#0/1 25 0 0
CGCAGTCGATCTCGTCGACGGAGAG

QA 1 25 6 25
DS VERSION: 1 TIME: Tue Jun 14 09:07:44 2011

RD ILLUMINA-E6F4B9:7:9:2094:17356#0/1 27 0 0
AGTCGATCTCGTCGACGGAGAGTTGGA

QA 1 27 3 27
DS VERSION: 1 TIME: Tue Jun 14 09:07:44 2011

RD ILLUMINA-E6F4B9:7:87:12179:18991#0/1 21 0 0
AGTCGATCTCGTCGACGGAGA

QA 1 21 3 21
DS VERSION: 1 TIME: Tue Jun 14 09:07:44 2011

RD ILLUMINA-E6F4B9:7:119:9329:15258#0/1 26 0 0
GTCGATCTCGTCGACGGAGAGTTGGA

QA 1 26 2 26
DS VERSION: 1 TIME: Tue Jun 14 09:07:44 2011

RD ILLUMINA-E6F4B9:7:10:16296:10275#0/1 22 0 0
CTCGTCGACGGAGAGTTGGATG

QA 1 22 1 22
DS VERSION: 1 TIME: Tue Jun 14 09:07:44 2011

RD ILLUMINA-E6F4B9:7:70:8501:11249#0/1 21 0 0
CTCGTCGACGGAGAGTTGGAT

QA 1 21 1 21
DS VERSION: 1 TIME: Tue Jun 14 09:07:44 2011

RD ILLUMINA-E6F4B9:7:29:13517:20902#0/1 19 0 0
CGTCGACGGAGAGTTGGAT

QA 1 19 1 19
DS VERSION: 1 TIME: Tue Jun 14 09:07:44 2011

RD ILLUMINA-E6F4B9:7:88:3909:15813#0/1 21 0 0
CGTCGACGGAGAGTTGGATGG

QA 1 21 1 21
DS VERSION: 1 TIME: Tue Jun 14 09:07:44 2011

RD ILLUMINA-E6F4B9:7:116:19042:20114#0/1 21 0 0
CGTCGACGGAGAGTTGGATGG

QA 1 21 1 21
DS VERSION: 1 TIME: Tue Jun 14 09:07:44 2011

RD ILLUMINA-E6F4B9:7:33:8732:14695#0/1 21 0 0
GTCGACGGAGAGTTGGATGGA

QA 1 21 1 21
DS VERSION: 1 TIME: Tue Jun 14 09:07:44 2011

RD ILLUMINA-E6F4B9:7:15:11843:2736#0/1 21 0 0
TCGACGGAGAGTTGGATGGAT

QA 1 21 1 21
DS VERSION: 1 TIME: Tue Jun 14 09:07:44 2011

RD ILLUMINA-E6F4B9:7:82:9907:15125#0/1 22 0 0
TCGACGGAGAGTTGGATGGATC

QA 1 22 1 22
DS VERSION: 1 TIME: Tue Jun 14 09:07:44 2011

RD ILLUMINA-E6F4B9:7:14:8289:14245#0/1 23 0 0
CGACGGAGAGTTGGATGGATCAA

QA 1 23 1 23
DS VERSION: 1 TIME: Tue Jun 14 09:07:44 2011

RD ILLUMINA-E6F4B9:7:28:8218:20568#0/1 20 0 0
CGACGGAGAGTTGGATGGAT

QA 1 20 1 20
DS VERSION: 1 TIME: Tue Jun 14 09:07:44 2011

RD ILLUMINA-E6F4B9:7:21:17821:4384#0/1 34 0 0
GACGGAGAGTTGGATGGATCAACTGGATCGTCGT

QA 1 34 1 30
DS VERSION: 1 TIME: Tue Jun 14 09:07:44 2011

RD ILLUMINA-E6F4B9:7:71:9107:9480#0/1 29 0 0
GACGGAGAGTTGGATGGATCAACTGGATC

QA 1 29 1 29
DS VERSION: 1 TIME: Tue Jun 14 09:07:44 2011

RD ILLUMINA-E6F4B9:7:70:1132:3818#0/1 20 0 0
ACGGAGAGTTGGATGGATCA

QA 1 20 1 20
DS VERSION: 1 TIME: Tue Jun 14 09:07:44 2011

RD ILLUMINA-E6F4B9:7:98:12469:11746#0/1 21 0 0
CGGAGAGTTGGATGGATCAAC

QA 1 21 1 20
DS VERSION: 1 TIME: Tue Jun 14 09:07:44 2011

RD ILLUMINA-E6F4B9:7:96:11115:16380#0/1 22 0 0
AGTTGGATGGATCAACTGGATC

QA 1 22 1 22
DS VERSION: 1 TIME: Tue Jun 14 09:07:44 2011

RD ILLUMINA-E6F4B9:7:21:15372:19124#0/1 24 0 0
TGGATGGATCAACTGGATCGAATC

QA 1 24 1 24
DS VERSION: 1 TIME: Tue Jun 14 09:07:44 2011

RD ILLUMINA-E6F4B9:7:70:5058:3587#0/1 24 0 0
TGGATGGATCAACTGGATCGAATC

QA 1 24 1 24
DS VERSION: 1 TIME: Tue Jun 14 09:07:44 2011

RD ILLUMINA-E6F4B9:7:54:6536:19335#0/1 25 0 0
CGGATGGATCAACTGGATCGAATCT

QA 1 25 2 24
DS VERSION: 1 TIME: Tue Jun 14 09:07:44 2011

RD ILLUMINA-E6F4B9:7:9:15436:6988#0/1 23 0 0
GGATGGATCAACTGGATCGAATC

QA 1 23 1 23
DS VERSION: 1 TIME: Tue Jun 14 09:07:44 2011

RD ILLUMINA-E6F4B9:7:39:14492:14569#0/1 23 0 0
GGATGGATCAACTGGATCGAATC

QA 1 23 1 23
DS VERSION: 1 TIME: Tue Jun 14 09:07:44 2011

RD ILLUMINA-E6F4B9:7:89:7037:7950#0/1 25 0 0
GGATGGATCAACTGGATCGAATCTC

QA 1 25 1 23
DS VERSION: 1 TIME: Tue Jun 14 09:07:44 2011

RD ILLUMINA-E6F4B9:7:103:7380:12177#0/1 22 0 0
GATGGATCAACTGGATCGAATC

QA 1 22 1 22
DS VERSION: 1 TIME: Tue Jun 14 09:07:44 2011

RD ILLUMINA-E6F4B9:7:83:3322:5632#0/1 23 0 0
AATGGATCAACTGGATCGAATCG

QA 1 23 2 23
DS VERSION: 1 TIME: Tue Jun 14 09:07:44 2011

RD ILLUMINA-E6F4B9:7:93:2940:2323#0/1 22 0 0
ATCAACTGGATCGAATCGAGAT

QA 1 22 1 21
DS VERSION: 1 TIME: Tue Jun 14 09:07:44 2011

RD ILLUMINA-E6F4B9:7:105:7920:7104#0/1 22 0 0
TGGATCGAATCGAGAAACAGCA

QA 1 22 1 22
DS VERSION: 1 TIME: Tue Jun 14 09:07:44 2011

RD ILLUMINA-E6F4B9:7:38:2703:11904#0/1 21 0 0
GATCGAATCGAGAAACAGCAT

QA 1 21 1 21
DS VERSION: 1 TIME: Tue Jun 14 09:07:44 2011

RD ILLUMINA-E6F4B9:7:83:17157:13554#0/1 27 0 0
GATCGAATCGAGAAACAGCATACTACA

QA 1 27 1 27
DS VERSION: 1 TIME: Tue Jun 14 09:07:44 2011

RD ILLUMINA-E6F4B9:7:25:15646:7189#0/1 21 0 0
AATCGAGAAACAGCATACTAC

QA 1 21 1 21
DS VERSION: 1 TIME: Tue Jun 14 09:07:44 2011

RD ILLUMINA-E6F4B9:7:5:1499:1209#0/1 22 0 0
ACGAGAAACAGCATACTACACA

QA 1 22 2 22
DS VERSION: 1 TIME: Tue Jun 14 09:07:44 2011

RD ILLUMINA-E6F4B9:7:6:18732:20575#0/1 21 0 0
AAACAGCATACTACACATTCG

QA 1 21 1 21
DS VERSION: 1 TIME: Tue Jun 14 09:07:44 2011

RD ILLUMINA-E6F4B9:7:49:17532:1275#0/1 21 0 0
AAACAGCATACTACACATTCG

QA 1 21 1 21
DS VERSION: 1 TIME: Tue Jun 14 09:07:44 2011

RD ILLUMINA-E6F4B9:7:96:4971:11431#0/1 21 0 0
AAACAGCATACTACACATTCG

QA 1 21 1 21
DS VERSION: 1 TIME: Tue Jun 14 09:07:44 2011

RD ILLUMINA-E6F4B9:7:35:16458:16943#0/1 21 0 0
ACAGCATACTACACATTCGTC

QA 1 21 1 21
DS VERSION: 1 TIME: Tue Jun 14 09:07:44 2011

RD ILLUMINA-E6F4B9:7:70:19427:14378#0/1 21 0 0
ACAGCATACTACACATTCGTC

QA 1 21 1 21
DS VERSION: 1 TIME: Tue Jun 14 09:07:44 2011

RD ILLUMINA-E6F4B9:7:95:4060:6944#0/1 21 0 0
ACAGCATACTACACATTCGTC

QA 1 21 1 21
DS VERSION: 1 TIME: Tue Jun 14 09:07:44 2011

RD ILLUMINA-E6F4B9:7:21:5610:7106#0/1 21 0 0
AGCATACTACACATTCGTCCT

QA 1 21 1 21
DS VERSION: 1 TIME: Tue Jun 14 09:07:44 2011

RD ILLUMINA-E6F4B9:7:97:6415:19317#0/1 21 0 0
AGCATACTACACATTCGTCCT

QA 1 21 1 21
DS VERSION: 1 TIME: Tue Jun 14 09:07:44 2011

RD ILLUMINA-E6F4B9:7:105:11669:18191#0/1 27 0 0
TGCATACTACACATTCGTCCTCCACAA

QA 1 27 2 27
DS VERSION: 1 TIME: Tue Jun 14 09:07:44 2011

RD ILLUMINA-E6F4B9:7:51:18040:14614#0/1 22 0 0
CATACTACACATTCGTCCTCCA

QA 1 22 1 22
DS VERSION: 1 TIME: Tue Jun 14 09:07:44 2011

RD ILLUMINA-E6F4B9:7:46:9543:17498#0/1 21 0 0
ATACTACACATTCGTCCTCCA

QA 1 21 1 21
DS VERSION: 1 TIME: Tue Jun 14 09:07:44 2011

RD ILLUMINA-E6F4B9:7:86:3488:16032#0/1 21 0 0
ATACTACACATTCGTCCTCCA

QA 1 21 1 21
DS VERSION: 1 TIME: Tue Jun 14 09:07:44 2011

RD ILLUMINA-E6F4B9:7:99:11083:15796#0/1 21 0 0
ATACTACACATTCGTCCTCAT

QA 1 21 1 19
DS VERSION: 1 TIME: Tue Jun 14 09:07:44 2011

RD ILLUMINA-E6F4B9:7:113:14223:14598#0/1 21 0 0
ATACTACACATTCGTCCTCCA

QA 1 21 1 21
DS VERSION: 1 TIME: Tue Jun 14 09:07:44 2011

RD ILLUMINA-E6F4B9:7:48:2521:4166#0/1 28 0 0
TACTACACATTCGTCCTCCACAAAGACA

QA 1 28 1 28
DS VERSION: 1 TIME: Tue Jun 14 09:07:44 2011

RD ILLUMINA-E6F4B9:7:99:18992:20483#0/1 28 0 0
TACTACACATTCGTCCTCCACAAAGACA

QA 1 28 1 28
DS VERSION: 1 TIME: Tue Jun 14 09:07:44 2011

RD ILLUMINA-E6F4B9:7:116:9062:15661#0/1 22 0 0
TACTACACATTCGTCCTCCACA

QA 1 22 1 22
DS VERSION: 1 TIME: Tue Jun 14 09:07:44 2011

RD ILLUMINA-E6F4B9:7:12:4559:7161#0/1 22 0 0
TGCTACACATTCGTCCTCCACT

QA 1 22 3 21
DS VERSION: 1 TIME: Tue Jun 14 09:07:44 2011

RD ILLUMINA-E6F4B9:7:9:6050:9808#0/1 20 0 0
CACATTCGTCCTCCACAAAG

QA 1 20 1 20
DS VERSION: 1 TIME: Tue Jun 14 09:07:44 2011

RD ILLUMINA-E6F4B9:7:50:9653:13870#0/1 20 0 0
CACATTCGTCCTCCACAAAG

QA 1 20 1 20
DS VERSION: 1 TIME: Tue Jun 14 09:07:44 2011

RD ILLUMINA-E6F4B9:7:50:11868:17082#0/1 20 0 0
CACATTCGTCCTCCACAAAG

QA 1 20 1 20
DS VERSION: 1 TIME: Tue Jun 14 09:07:44 2011

RD ILLUMINA-E6F4B9:7:79:4273:18428#0/1 20 0 0
CACATTCGTCCTCCACAAAG

QA 1 20 1 20
DS VERSION: 1 TIME: Tue Jun 14 09:07:44 2011

RD ILLUMINA-E6F4B9:7:85:4849:13104#0/1 20 0 0
CACATTCGTCCTCCACAAAG

QA 1 20 1 20
DS VERSION: 1 TIME: Tue Jun 14 09:07:44 2011

RD ILLUMINA-E6F4B9:7:16:14338:12295#0/1 21 0 0
GTCCTCCACAAAGACAACGTT

QA 1 21 1 21
DS VERSION: 1 TIME: Tue Jun 14 09:07:44 2011

RD ILLUMINA-E6F4B9:7:26:9513:11690#0/1 21 0 0
GTCCTCCACAAAGACAACGTT

QA 1 21 1 21
DS VERSION: 1 TIME: Tue Jun 14 09:07:44 2011

RD ILLUMINA-E6F4B9:7:35:15667:13092#0/1 21 0 0
GTCCTCCACAAAGACAACGTT

QA 1 21 1 21
DS VERSION: 1 TIME: Tue Jun 14 09:07:44 2011

RD ILLUMINA-E6F4B9:7:101:11441:2638#0/1 21 0 0
GTCCTCCACAAAGACAACGTT

QA 1 21 1 21
DS VERSION: 1 TIME: Tue Jun 14 09:07:44 2011

RD ILLUMINA-E6F4B9:7:29:18273:5786#0/1 21 0 0
TCCTCCACAAAGACAACGTTA

QA 1 21 1 21
DS VERSION: 1 TIME: Tue Jun 14 09:07:44 2011

RD ILLUMINA-E6F4B9:7:104:15811:6111#0/1 21 0 0
GCCCTCCACAAAGACAACGTT

QA 1 21 3 21
DS VERSION: 1 TIME: Tue Jun 14 09:07:44 2011

RD ILLUMINA-E6F4B9:7:60:15271:9178#0/1 21 0 0
CCTCCACAAAGACAACGTTAA

QA 1 21 1 21
DS VERSION: 1 TIME: Tue Jun 14 09:07:44 2011

RD ILLUMINA-E6F4B9:7:96:10564:7144#0/1 21 0 0
CCTCCACAAAGACAACGTTAA

QA 1 21 1 21
DS VERSION: 1 TIME: Tue Jun 14 09:07:44 2011

RD ILLUMINA-E6F4B9:7:41:4926:16851#0/1 21 0 0
CTCCACAAAGACAACGTTAAA

QA 1 21 1 21
DS VERSION: 1 TIME: Tue Jun 14 09:07:44 2011

RD ILLUMINA-E6F4B9:7:13:5293:8861#0/1 21 0 0
AAAGACAACGTTAAAGAGGAC

QA 1 21 1 21
DS VERSION: 1 TIME: Tue Jun 14 09:07:44 2011

RD ILLUMINA-E6F4B9:7:70:2980:17460#0/1 23 0 0
AAAGACAACGTTAAAGAGGACTG

QA 1 23 1 23
DS VERSION: 1 TIME: Tue Jun 14 09:07:44 2011

RD ILLUMINA-E6F4B9:7:102:12385:6585#0/1 21 0 0
AAAGACAACGTTAAAGAGGAC

QA 1 21 1 21
DS VERSION: 1 TIME: Tue Jun 14 09:07:44 2011

RD ILLUMINA-E6F4B9:7:4:13583:15442#0/1 21 0 0
AAGACAACGTTAAAGAGGACT

QA 1 21 1 21
DS VERSION: 1 TIME: Tue Jun 14 09:07:44 2011

RD ILLUMINA-E6F4B9:7:22:12728:13996#0/1 28 0 0
AAGACAACGTTAAAGAGGACTGGAGATA

QA 1 28 1 28
DS VERSION: 1 TIME: Tue Jun 14 09:07:44 2011

RD ILLUMINA-E6F4B9:7:41:5301:3482#0/1 26 0 0
AAGACAACGTTAAAGAGGACTGGAGA

QA 1 26 1 26
DS VERSION: 1 TIME: Tue Jun 14 09:07:44 2011

RD ILLUMINA-E6F4B9:7:101:17682:1893#0/1 28 0 0
AAGACAACGTTAAAGAGGACTGGAGATA

QA 1 28 1 28
DS VERSION: 1 TIME: Tue Jun 14 09:07:44 2011

RD ILLUMINA-E6F4B9:7:118:1573:1762#0/1 27 0 0
AAGACAACGTTAAAGAGGACTGGAGAT

QA 1 27 1 27
DS VERSION: 1 TIME: Tue Jun 14 09:07:44 2011

RD ILLUMINA-E6F4B9:7:29:4042:15015#0/1 21 0 0
AGACAACGTTAAAGAGGACTG

QA 1 21 1 21
DS VERSION: 1 TIME: Tue Jun 14 09:07:44 2011

RD ILLUMINA-E6F4B9:7:44:7670:14968#0/1 27 0 0
AGACAACGTTAAAGAGGACTGGAGATA

QA 1 27 1 27
DS VERSION: 1 TIME: Tue Jun 14 09:07:44 2011

RD ILLUMINA-E6F4B9:7:87:17477:11900#0/1 27 0 0
AGACAACGTTAAAGAGGACTGGAGATA

QA 1 27 1 27
DS VERSION: 1 TIME: Tue Jun 14 09:07:44 2011

RD ILLUMINA-E6F4B9:7:114:18726:16785#0/1 26 0 0
AGACAACGTTAAAGAGGACTGGAGAT

QA 1 26 1 26
DS VERSION: 1 TIME: Tue Jun 14 09:07:44 2011

RD ILLUMINA-E6F4B9:7:4:7598:5991#0/1 28 0 0
GACAACGTTAAAGAGGACTGGAGATACA

QA 1 28 1 28
DS VERSION: 1 TIME: Tue Jun 14 09:07:44 2011

RD ILLUMINA-E6F4B9:7:10:4085:10675#0/1 32 0 0
GACAACGTTAAAGAGGACTGGAGATACATTTT

QA 1 32 1 29
DS VERSION: 1 TIME: Tue Jun 14 09:07:44 2011

RD ILLUMINA-E6F4B9:7:48:6974:5894#0/1 26 0 0
GACAACGTTAAAGAGGACTGGAGATA

QA 1 26 1 26
DS VERSION: 1 TIME: Tue Jun 14 09:07:44 2011

RD ILLUMINA-E6F4B9:7:58:9101:17966#0/1 26 0 0
GACAACGTTAAAGAGGACTGGAGATA

QA 1 26 1 26
DS VERSION: 1 TIME: Tue Jun 14 09:07:44 2011

RD ILLUMINA-E6F4B9:7:75:3828:9926#0/1 28 0 0
GACAACGTTAAAGAGGACTGGAGATACA

QA 1 28 1 28
DS VERSION: 1 TIME: Tue Jun 14 09:07:44 2011

RD ILLUMINA-E6F4B9:7:90:9642:8820#0/1 22 0 0
GACAACGTTAAAGAGGACTGGA

QA 1 22 1 22
DS VERSION: 1 TIME: Tue Jun 14 09:07:44 2011

RD ILLUMINA-E6F4B9:7:66:11561:20024#0/1 24 0 0
AACAACGTTAAAGAGGACTGGAGA

QA 1 24 2 24
DS VERSION: 1 TIME: Tue Jun 14 09:07:44 2011

RD ILLUMINA-E6F4B9:7:7:2163:9792#0/1 27 0 0
ACAACGTTAAAGAGGACTGGAGATACA

QA 1 27 1 27
DS VERSION: 1 TIME: Tue Jun 14 09:07:44 2011

RD ILLUMINA-E6F4B9:7:23:14516:16694#0/1 27 0 0
ACAACGTTAAAGAGGACTGGAGATACA

QA 1 27 1 27
DS VERSION: 1 TIME: Tue Jun 14 09:07:44 2011

RD ILLUMINA-E6F4B9:7:24:12480:20170#0/1 25 0 0
ACAACGTTAAAGAGGACTGGAGATA

QA 1 25 1 25
DS VERSION: 1 TIME: Tue Jun 14 09:07:44 2011

RD ILLUMINA-E6F4B9:7:45:5496:6609#0/1 29 0 0
ACAACGTTAAAGAGGACTGGAGATACATC

QA 1 29 1 29
DS VERSION: 1 TIME: Tue Jun 14 09:07:44 2011

RD ILLUMINA-E6F4B9:7:83:11068:12393#0/1 27 0 0
ACAACGTTAAAGAGGACTGGAGATACA

QA 1 27 1 27
DS VERSION: 1 TIME: Tue Jun 14 09:07:44 2011

RD ILLUMINA-E6F4B9:7:91:6405:9177#0/1 25 0 0
ACAACGTTAAAGAGGACTGGAGATA

QA 1 25 1 25
DS VERSION: 1 TIME: Tue Jun 14 09:07:44 2011

RD ILLUMINA-E6F4B9:7:111:5147:6030#0/1 21 0 0
ACAACGTTAAAGAGGACTGGA

QA 1 21 1 21
DS VERSION: 1 TIME: Tue Jun 14 09:07:44 2011

RD ILLUMINA-E6F4B9:7:116:17668:17624#0/1 23 0 0
ACAACGTTAAAGAGGACTGGAGA

QA 1 23 1 23
DS VERSION: 1 TIME: Tue Jun 14 09:07:44 2011

RD ILLUMINA-E6F4B9:7:4:2454:20649#0/1 26 0 0
CAACGTTAAAGAGGACTGGAGATACA

QA 1 26 1 26
DS VERSION: 1 TIME: Tue Jun 14 09:07:44 2011

RD ILLUMINA-E6F4B9:7:27:15704:15077#0/1 26 0 0
CAACGTTAAAGAGGACTGGAGATACA

QA 1 26 1 26
DS VERSION: 1 TIME: Tue Jun 14 09:07:44 2011

RD ILLUMINA-E6F4B9:7:42:10442:3353#0/1 19 0 0
CAACGTTAAAGAGGACTGG

QA 1 19 1 19
DS VERSION: 1 TIME: Tue Jun 14 09:07:44 2011

RD ILLUMINA-E6F4B9:7:43:7903:5319#0/1 26 0 0
CAACGTTAAAGAGGACTGGAGATACA

QA 1 26 1 26
DS VERSION: 1 TIME: Tue Jun 14 09:07:44 2011

RD ILLUMINA-E6F4B9:7:48:17273:13482#0/1 22 0 0
CAACGTTAAAGAGGACTGGAGT

QA 1 22 1 21
DS VERSION: 1 TIME: Tue Jun 14 09:07:44 2011

RD ILLUMINA-E6F4B9:7:51:8589:13380#0/1 26 0 0
CAACGTTAAAGAGGACTGGAGATACA

QA 1 26 1 26
DS VERSION: 1 TIME: Tue Jun 14 09:07:44 2011

RD ILLUMINA-E6F4B9:7:101:12063:2881#0/1 24 0 0
CAACGTTAAAGAGGACTGGAGATA

QA 1 24 1 24
DS VERSION: 1 TIME: Tue Jun 14 09:07:44 2011

RD ILLUMINA-E6F4B9:7:113:11973:8402#0/1 26 0 0
CAACGTTAAAGAGGACTGGAGATACA

QA 1 26 1 26
DS VERSION: 1 TIME: Tue Jun 14 09:07:44 2011

RD ILLUMINA-E6F4B9:7:113:15482:21190#0/1 26 0 0
CAACGTTAAAGAGGACTGGAGATACA

QA 1 26 1 26
DS VERSION: 1 TIME: Tue Jun 14 09:07:44 2011

RD ILLUMINA-E6F4B9:7:3:5877:7538#0/1 25 0 0
AACGTTAAAGAGGACTGGAGATACA

QA 1 25 1 25
DS VERSION: 1 TIME: Tue Jun 14 09:07:44 2011

RD ILLUMINA-E6F4B9:7:12:8703:12050#0/1 21 0 0
AACGTTAAAGAGGACTGGAGA

QA 1 21 1 21
DS VERSION: 1 TIME: Tue Jun 14 09:07:44 2011

RD ILLUMINA-E6F4B9:7:44:6714:20699#0/1 19 0 0
AACGTTAAAGAGGACTGGA

QA 1 19 1 19
DS VERSION: 1 TIME: Tue Jun 14 09:07:44 2011

RD ILLUMINA-E6F4B9:7:46:12035:16692#0/1 20 0 0
AACGTTAAAGAGGACTGGAG

QA 1 20 1 20
DS VERSION: 1 TIME: Tue Jun 14 09:07:44 2011

RD ILLUMINA-E6F4B9:7:53:12060:15080#0/1 25 0 0
AACGTTAAAGAGGACTGGAGATACA

QA 1 25 1 25
DS VERSION: 1 TIME: Tue Jun 14 09:07:44 2011

RD ILLUMINA-E6F4B9:7:58:9251:18659#0/1 25 0 0
AACGTTAAAGAGGACTGGAGATACA

QA 1 25 1 25
DS VERSION: 1 TIME: Tue Jun 14 09:07:44 2011

RD ILLUMINA-E6F4B9:7:69:2161:2291#0/1 25 0 0
AACGTTAAAGAGGACTGGAGATACA

QA 1 25 1 25
DS VERSION: 1 TIME: Tue Jun 14 09:07:44 2011

RD ILLUMINA-E6F4B9:7:69:10807:15389#0/1 20 0 0
AACGTTAAAGAGGACTGGAG

QA 1 20 1 20
DS VERSION: 1 TIME: Tue Jun 14 09:07:44 2011

RD ILLUMINA-E6F4B9:7:74:16200:18473#0/1 25 0 0
AACGTTAAAGAGGACTGGAGATACA

QA 1 25 1 25
DS VERSION: 1 TIME: Tue Jun 14 09:07:44 2011

RD ILLUMINA-E6F4B9:7:75:18107:4389#0/1 21 0 0
AACGTTAAAGAGGACTGGAGA

QA 1 21 1 21
DS VERSION: 1 TIME: Tue Jun 14 09:07:44 2011

RD ILLUMINA-E6F4B9:7:98:10687:3827#0/1 23 0 0
AACGTTAAAGAGGACTGGAGATA

QA 1 23 1 23
DS VERSION: 1 TIME: Tue Jun 14 09:07:44 2011

RD ILLUMINA-E6F4B9:7:109:6040:2771#0/1 27 0 0
AACGTTAAAGAGGACTGGAGATACATC

QA 1 27 1 27
DS VERSION: 1 TIME: Tue Jun 14 09:07:44 2011

RD ILLUMINA-E6F4B9:7:115:15716:20777#0/1 24 0 0
AACGTTAAAGAGGACTGGAGATAC

QA 1 24 1 24
DS VERSION: 1 TIME: Tue Jun 14 09:07:44 2011

RD ILLUMINA-E6F4B9:7:119:10826:3394#0/1 23 0 0
AACGTTAAAGAGGACTGGAGATA

QA 1 23 1 23
DS VERSION: 1 TIME: Tue Jun 14 09:07:44 2011

RD ILLUMINA-E6F4B9:7:46:14728:6512#0/1 22 0 0
ATTACGTTAAAGAGGACTGGAG

QA 1 22 4 22
DS VERSION: 1 TIME: Tue Jun 14 09:07:44 2011

RD ILLUMINA-E6F4B9:7:2:15921:3533#0/1 26 0 0
ACGTTAAAGAGGACTGGAGATACATC

QA 1 26 1 26
DS VERSION: 1 TIME: Tue Jun 14 09:07:44 2011

RD ILLUMINA-E6F4B9:7:9:14987:20392#0/1 24 0 0
ACGTTAAAGAGGACTGGAGATACA

QA 1 24 1 24
DS VERSION: 1 TIME: Tue Jun 14 09:07:44 2011

RD ILLUMINA-E6F4B9:7:18:6175:7804#0/1 26 0 0
ACGTTAAAGAGGACTGGAGATACATC

QA 1 26 1 26
DS VERSION: 1 TIME: Tue Jun 14 09:07:44 2011

RD ILLUMINA-E6F4B9:7:20:18961:2568#0/1 18 0 0
ACGTTAAAGAGGACTGGA

QA 1 18 1 18
DS VERSION: 1 TIME: Tue Jun 14 09:07:44 2011

RD ILLUMINA-E6F4B9:7:20:11562:18863#0/1 25 0 0
ACGTTAAAGAGGACTGGAGATACAT

QA 1 25 1 25
DS VERSION: 1 TIME: Tue Jun 14 09:07:44 2011

RD ILLUMINA-E6F4B9:7:23:12559:16564#0/1 26 0 0
ACGTTAAAGAGGACTGGAGATACATC

QA 1 26 1 26
DS VERSION: 1 TIME: Tue Jun 14 09:07:44 2011

RD ILLUMINA-E6F4B9:7:29:13113:1706#0/1 20 0 0
ACGTTAAAGAGGACTGGAGA

QA 1 20 1 20
DS VERSION: 1 TIME: Tue Jun 14 09:07:44 2011

RD ILLUMINA-E6F4B9:7:29:19558:8938#0/1 18 0 0
ACGTTAAAGAGGACTGGA

QA 1 18 1 18
DS VERSION: 1 TIME: Tue Jun 14 09:07:44 2011

RD ILLUMINA-E6F4B9:7:32:11489:8099#0/1 21 0 0
ACGTTAAAGAGGACTGGAGAT

QA 1 21 1 21
DS VERSION: 1 TIME: Tue Jun 14 09:07:44 2011

RD ILLUMINA-E6F4B9:7:33:11894:4967#0/1 26 0 0
ACGTTAAAGAGGACTGGAGATACATC

QA 1 26 1 26
DS VERSION: 1 TIME: Tue Jun 14 09:07:44 2011

RD ILLUMINA-E6F4B9:7:40:2630:19014#0/1 26 0 0
ACGTTAAAGAGGACTGGAGATACATC

QA 1 26 1 26
DS VERSION: 1 TIME: Tue Jun 14 09:07:44 2011

RD ILLUMINA-E6F4B9:7:41:19361:13572#0/1 22 0 0
ACGTTAAAGAGGACTGGAGATA

QA 1 22 1 22
DS VERSION: 1 TIME: Tue Jun 14 09:07:44 2011

RD ILLUMINA-E6F4B9:7:50:19507:3220#0/1 22 0 0
ACGTTAAAGAGGACTGGAGATA

QA 1 22 1 22
DS VERSION: 1 TIME: Tue Jun 14 09:07:44 2011

RD ILLUMINA-E6F4B9:7:50:14264:7995#0/1 22 0 0
ACGTTAAAGAGGACTGGAGATA

QA 1 22 1 22
DS VERSION: 1 TIME: Tue Jun 14 09:07:44 2011

RD ILLUMINA-E6F4B9:7:53:12116:11674#0/1 24 0 0
ACGTTAAAGAGGACTGGAGATACA

QA 1 24 1 24
DS VERSION: 1 TIME: Tue Jun 14 09:07:44 2011

RD ILLUMINA-E6F4B9:7:56:2144:13197#0/1 22 0 0
ACGTTAAAGAGGACTGGAGATA

QA 1 22 1 22
DS VERSION: 1 TIME: Tue Jun 14 09:07:44 2011

RD ILLUMINA-E6F4B9:7:62:8288:8163#0/1 24 0 0
ACGTTAAAGAGGACTGGAGATACA

QA 1 24 1 24
DS VERSION: 1 TIME: Tue Jun 14 09:07:44 2011

RD ILLUMINA-E6F4B9:7:68:12504:6571#0/1 22 0 0
ACGTTAAAGAGGACTGGAGATA

QA 1 22 1 22
DS VERSION: 1 TIME: Tue Jun 14 09:07:44 2011

RD ILLUMINA-E6F4B9:7:70:7246:7767#0/1 22 0 0
ACGTTAAAGAGGACTGGAGATA

QA 1 22 1 22
DS VERSION: 1 TIME: Tue Jun 14 09:07:44 2011

RD ILLUMINA-E6F4B9:7:72:12919:1727#0/1 24 0 0
ACGTTAAAGAGGACTGGAGATACA

QA 1 24 1 24
DS VERSION: 1 TIME: Tue Jun 14 09:07:44 2011

RD ILLUMINA-E6F4B9:7:73:8735:14065#0/1 24 0 0
ACGTTAAAGAGGACTGGAGATACA

QA 1 24 1 24
DS VERSION: 1 TIME: Tue Jun 14 09:07:44 2011

RD ILLUMINA-E6F4B9:7:75:15693:9851#0/1 20 0 0
ACGTTAAAGAGGACTGGAGA

QA 1 20 1 20
DS VERSION: 1 TIME: Tue Jun 14 09:07:44 2011

RD ILLUMINA-E6F4B9:7:80:7152:7104#0/1 26 0 0
ACGTTAAAGAGGACTGGAGATACATC

QA 1 26 1 26
DS VERSION: 1 TIME: Tue Jun 14 09:07:44 2011

RD ILLUMINA-E6F4B9:7:82:3629:12128#0/1 26 0 0
ACGTTAAAGAGGACTGGAGATACATC

QA 1 26 1 26
DS VERSION: 1 TIME: Tue Jun 14 09:07:44 2011

RD ILLUMINA-E6F4B9:7:90:4083:1357#0/1 19 0 0
ACGTTAAAGAGGACTGGAG

QA 1 19 1 19
DS VERSION: 1 TIME: Tue Jun 14 09:07:44 2011

RD ILLUMINA-E6F4B9:7:95:17293:21267#0/1 22 0 0
ACGTTAAAGAGGACTGGAGATA

QA 1 22 1 22
DS VERSION: 1 TIME: Tue Jun 14 09:07:44 2011

RD ILLUMINA-E6F4B9:7:103:12504:4149#0/1 24 0 0
ACGTTAAAGAGGACTGGAGATACA

QA 1 24 1 24
DS VERSION: 1 TIME: Tue Jun 14 09:07:44 2011

RD ILLUMINA-E6F4B9:7:105:17017:18716#0/1 26 0 0
ACGTTAAAGAGGACTGGAGATACATC

QA 1 26 1 26
DS VERSION: 1 TIME: Tue Jun 14 09:07:44 2011

RD ILLUMINA-E6F4B9:7:107:5808:16402#0/1 18 0 0
ACGTTAAAGAGGACTGGA

QA 1 18 1 18
DS VERSION: 1 TIME: Tue Jun 14 09:07:44 2011

RD ILLUMINA-E6F4B9:7:115:1128:1125#0/1 26 0 0
ACGTTAAAGAGGACTGGAGATACATC

QA 1 26 1 26
DS VERSION: 1 TIME: Tue Jun 14 09:07:44 2011

RD ILLUMINA-E6F4B9:7:115:10254:5701#0/1 24 0 0
ACGTTAAAGAGGACTGGAGATACA

QA 1 24 1 24
DS VERSION: 1 TIME: Tue Jun 14 09:07:44 2011

RD ILLUMINA-E6F4B9:7:118:7672:8681#0/1 24 0 0
ACGTTAAAGAGTACTGGAGATACA

QA 1 24 1 24
DS VERSION: 1 TIME: Tue Jun 14 09:07:44 2011

RD ILLUMINA-E6F4B9:7:118:10252:13400#0/1 24 0 0
ACGTTAAAGAGGACTGGAGATACA

QA 1 24 1 24
DS VERSION: 1 TIME: Tue Jun 14 09:07:44 2011

RD ILLUMINA-E6F4B9:7:120:12076:18303#0/1 24 0 0
ACGTTAAAGAGGACTGGAGATACA

QA 1 24 1 24
DS VERSION: 1 TIME: Tue Jun 14 09:07:44 2011

RD ILLUMINA-E6F4B9:7:78:17652:13479#0/1 28 0 0
GACGGCGTTAAAGAGGACTGGAGATACG

QA 1 28 6 27
DS VERSION: 1 TIME: Tue Jun 14 09:07:44 2011

RD ILLUMINA-E6F4B9:7:45:16524:8345#0/1 21 0 0
AGCGTTAAAGAGGACTGGAGA

QA 1 21 3 21
DS VERSION: 1 TIME: Tue Jun 14 09:07:44 2011

RD ILLUMINA-E6F4B9:7:2:4628:7432#0/1 21 0 0
CGTTAAAGAGGACTGGAGATA

QA 1 21 1 21
DS VERSION: 1 TIME: Tue Jun 14 09:07:44 2011

RD ILLUMINA-E6F4B9:7:3:16263:1632#0/1 19 0 0
CGTTAAAGAGGACTGGAGA

QA 1 19 1 19
DS VERSION: 1 TIME: Tue Jun 14 09:07:44 2011

RD ILLUMINA-E6F4B9:7:14:16445:17280#0/1 21 0 0
CGTTAAAGAGGACTGGAGATA

QA 1 21 1 21
DS VERSION: 1 TIME: Tue Jun 14 09:07:44 2011

RD ILLUMINA-E6F4B9:7:18:14055:8867#0/1 21 0 0
CGTTAAAGAGGACTGGAGATA

QA 1 21 1 21
DS VERSION: 1 TIME: Tue Jun 14 09:07:44 2011

RD ILLUMINA-E6F4B9:7:28:17659:7678#0/1 27 0 0
CGTTAAAGAGGACTGGAGATACATCGC

QA 1 27 1 27
DS VERSION: 1 TIME: Tue Jun 14 09:07:44 2011

RD ILLUMINA-E6F4B9:7:35:5994:11648#0/1 21 0 0
CGTTAAAGAGGACTGGAGATA

QA 1 21 1 21
DS VERSION: 1 TIME: Tue Jun 14 09:07:44 2011

RD ILLUMINA-E6F4B9:7:36:6614:12721#0/1 21 0 0
CGTTAAAGAGGACTGGAGATA

QA 1 21 1 21
DS VERSION: 1 TIME: Tue Jun 14 09:07:44 2011

RD ILLUMINA-E6F4B9:7:39:2436:1259#0/1 22 0 0
CGTTAAAGAGGACTGGAGATAT

QA 1 22 1 21
DS VERSION: 1 TIME: Tue Jun 14 09:07:44 2011

RD ILLUMINA-E6F4B9:7:39:3806:7850#0/1 21 0 0
CGTTAAAGAGGACTGGAGATA

QA 1 21 1 21
DS VERSION: 1 TIME: Tue Jun 14 09:07:44 2011

RD ILLUMINA-E6F4B9:7:40:19606:7560#0/1 21 0 0
CGTTAAAGAGGACTGGAGATA

QA 1 21 1 21
DS VERSION: 1 TIME: Tue Jun 14 09:07:44 2011

RD ILLUMINA-E6F4B9:7:53:15869:12671#0/1 21 0 0
CGTTAAAGAGGACTGGAGATA

QA 1 21 1 21
DS VERSION: 1 TIME: Tue Jun 14 09:07:44 2011

RD ILLUMINA-E6F4B9:7:55:5906:1376#0/1 21 0 0
CGTTAAAGAGGACTGGAGATA

QA 1 21 1 21
DS VERSION: 1 TIME: Tue Jun 14 09:07:44 2011

RD ILLUMINA-E6F4B9:7:55:2879:15786#0/1 23 0 0
CGTTAAAGAGGACTGGAGATACA

QA 1 23 1 23
DS VERSION: 1 TIME: Tue Jun 14 09:07:44 2011

RD ILLUMINA-E6F4B9:7:57:17716:16444#0/1 21 0 0
CGTTAAAGAGGACTGGAGATA

QA 1 21 1 21
DS VERSION: 1 TIME: Tue Jun 14 09:07:44 2011

RD ILLUMINA-E6F4B9:7:59:17134:12024#0/1 19 0 0
CGTTAAAGAGGACTGGAGA

QA 1 19 1 19
DS VERSION: 1 TIME: Tue Jun 14 09:07:44 2011

RD ILLUMINA-E6F4B9:7:65:8031:8005#0/1 21 0 0
CGTTAAAGAGGACTGGAGATA

QA 1 21 1 21
DS VERSION: 1 TIME: Tue Jun 14 09:07:44 2011

RD ILLUMINA-E6F4B9:7:74:19433:7635#0/1 21 0 0
CGTTAAAGAGGACTGGAGATA

QA 1 21 1 21
DS VERSION: 1 TIME: Tue Jun 14 09:07:44 2011

RD ILLUMINA-E6F4B9:7:81:6040:15744#0/1 23 0 0
CGTTAAAGAGGACTGGAGATACA

QA 1 23 1 23
DS VERSION: 1 TIME: Tue Jun 14 09:07:44 2011

RD ILLUMINA-E6F4B9:7:88:4270:16618#0/1 21 0 0
CGTTAAAGAGGACTGGAGATA

QA 1 21 1 21
DS VERSION: 1 TIME: Tue Jun 14 09:07:44 2011

RD ILLUMINA-E6F4B9:7:94:5705:2108#0/1 23 0 0
CGTTAAAGAGGACTGGAGATACA

QA 1 23 1 23
DS VERSION: 1 TIME: Tue Jun 14 09:07:44 2011

RD ILLUMINA-E6F4B9:7:95:16075:3844#0/1 23 0 0
CGTTAAAGAGGACTGGAGATACA

QA 1 23 1 23
DS VERSION: 1 TIME: Tue Jun 14 09:07:44 2011

RD ILLUMINA-E6F4B9:7:98:12526:5048#0/1 23 0 0
CGTTAAAGAGGACTGGAGATACA

QA 1 23 1 23
DS VERSION: 1 TIME: Tue Jun 14 09:07:44 2011

RD ILLUMINA-E6F4B9:7:113:8888:8409#0/1 21 0 0
CGTTAAAGAGGACTGGAGATA

QA 1 21 1 21
DS VERSION: 1 TIME: Tue Jun 14 09:07:44 2011

RD ILLUMINA-E6F4B9:7:115:5694:10512#0/1 21 0 0
CGTTAAAGAGGACTGGAGATA

QA 1 21 1 21
DS VERSION: 1 TIME: Tue Jun 14 09:07:44 2011

RD ILLUMINA-E6F4B9:7:115:13111:18952#0/1 21 0 0
CGTTAAAGAGGACTGGAGATA

QA 1 21 1 21
DS VERSION: 1 TIME: Tue Jun 14 09:07:44 2011

RD ILLUMINA-E6F4B9:7:3:15758:16623#0/1 26 0 0
GTTAAAGAGGACTGGAGATACATCGC

QA 1 26 1 26
DS VERSION: 1 TIME: Tue Jun 14 09:07:44 2011

RD ILLUMINA-E6F4B9:7:4:12147:10676#0/1 20 0 0
GTTAAAGAGGACTGGAGATA

QA 1 20 1 20
DS VERSION: 1 TIME: Tue Jun 14 09:07:44 2011

RD ILLUMINA-E6F4B9:7:6:15779:19413#0/1 24 0 0
GTTAAAGAGGACTGGAGATACATC

QA 1 24 1 24
DS VERSION: 1 TIME: Tue Jun 14 09:07:44 2011

RD ILLUMINA-E6F4B9:7:10:16198:3860#0/1 24 0 0
GTTAAAGAGGACTGGAGATACATT

QA 1 24 1 23
DS VERSION: 1 TIME: Tue Jun 14 09:07:44 2011

RD ILLUMINA-E6F4B9:7:12:17219:18177#0/1 22 0 0
GTTAAAGAGGACTGGAGATACA

QA 1 22 1 22
DS VERSION: 1 TIME: Tue Jun 14 09:07:44 2011

RD ILLUMINA-E6F4B9:7:21:15456:14857#0/1 24 0 0
GTTAAAGAGGACTGGAGATACATC

QA 1 24 1 24
DS VERSION: 1 TIME: Tue Jun 14 09:07:44 2011

RD ILLUMINA-E6F4B9:7:23:13461:20836#0/1 20 0 0
GTTAAAGAGGACTGGAGATA

QA 1 20 1 20
DS VERSION: 1 TIME: Tue Jun 14 09:07:44 2011

RD ILLUMINA-E6F4B9:7:28:8604:16138#0/1 18 0 0
GTTAAAGAGGACTGGAGA

QA 1 18 1 18
DS VERSION: 1 TIME: Tue Jun 14 09:07:44 2011

RD ILLUMINA-E6F4B9:7:30:7499:10676#0/1 24 0 0
GTTAAAGAGGACTGGAGATACATC

QA 1 24 1 24
DS VERSION: 1 TIME: Tue Jun 14 09:07:44 2011

RD ILLUMINA-E6F4B9:7:31:1322:2624#0/1 24 0 0
GTTAAAGAGGACTGGAGATACATC

QA 1 24 1 24
DS VERSION: 1 TIME: Tue Jun 14 09:07:44 2011

RD ILLUMINA-E6F4B9:7:31:17349:7095#0/1 27 0 0
GTTAAAGAGGACTGGAGATACATCGCC

QA 1 27 1 27
DS VERSION: 1 TIME: Tue Jun 14 09:07:44 2011

RD ILLUMINA-E6F4B9:7:43:2856:2255#0/1 20 0 0
GTTAAAGAGGACTGGAGATG

QA 1 20 1 19
DS VERSION: 1 TIME: Tue Jun 14 09:07:44 2011

RD ILLUMINA-E6F4B9:7:43:1921:4196#0/1 19 0 0
GTTAAAGAGGACTGGAGAT

QA 1 19 1 19
DS VERSION: 1 TIME: Tue Jun 14 09:07:44 2011

RD ILLUMINA-E6F4B9:7:44:5660:8643#0/1 23 0 0
GTTAAAGAGGACTGGAGATACAT

QA 1 23 1 23
DS VERSION: 1 TIME: Tue Jun 14 09:07:44 2011

RD ILLUMINA-E6F4B9:7:44:3927:17750#0/1 20 0 0
GTTAAAGAGGACTGGAGATA

QA 1 20 1 20
DS VERSION: 1 TIME: Tue Jun 14 09:07:44 2011

RD ILLUMINA-E6F4B9:7:45:19021:14798#0/1 22 0 0
GTTAAAGAGGACTGGAGATACA

QA 1 22 1 22
DS VERSION: 1 TIME: Tue Jun 14 09:07:44 2011

RD ILLUMINA-E6F4B9:7:48:19666:14867#0/1 24 0 0
GTTAAAGAGGACTGGAGATACATC

QA 1 24 1 24
DS VERSION: 1 TIME: Tue Jun 14 09:07:44 2011

RD ILLUMINA-E6F4B9:7:49:5428:15998#0/1 20 0 0
GTTAAAGAGGACTGGAGATA

QA 1 20 1 20
DS VERSION: 1 TIME: Tue Jun 14 09:07:44 2011

RD ILLUMINA-E6F4B9:7:50:7949:8805#0/1 20 0 0
GTTAAAGAGGACTGGAGATA

QA 1 20 1 20
DS VERSION: 1 TIME: Tue Jun 14 09:07:44 2011

RD ILLUMINA-E6F4B9:7:51:18786:1692#0/1 20 0 0
GTTAAAGAGGACTGGAGATA

QA 1 20 1 20
DS VERSION: 1 TIME: Tue Jun 14 09:07:44 2011

RD ILLUMINA-E6F4B9:7:59:10403:3662#0/1 20 0 0
GTTAAAGAGGACTGGAGATA

QA 1 20 1 20
DS VERSION: 1 TIME: Tue Jun 14 09:07:44 2011

RD ILLUMINA-E6F4B9:7:60:12526:11222#0/1 20 0 0
GTTAAAGAGGACTGGAGATA

QA 1 20 1 20
DS VERSION: 1 TIME: Tue Jun 14 09:07:44 2011

RD ILLUMINA-E6F4B9:7:61:1494:5959#0/1 22 0 0
GTTAAAGAGGACTGGAGATACA

QA 1 22 1 22
DS VERSION: 1 TIME: Tue Jun 14 09:07:44 2011

RD ILLUMINA-E6F4B9:7:66:2066:3672#0/1 22 0 0
GTTAAAGAGGACTGGAGATACA

QA 1 22 1 22
DS VERSION: 1 TIME: Tue Jun 14 09:07:44 2011

RD ILLUMINA-E6F4B9:7:67:5358:8035#0/1 24 0 0
GTTAAAGAGGACTGGAGATACATC

QA 1 24 1 24
DS VERSION: 1 TIME: Tue Jun 14 09:07:44 2011

RD ILLUMINA-E6F4B9:7:68:9492:7776#0/1 18 0 0
GTTAAAGAGGACTGGAGA

QA 1 18 1 18
DS VERSION: 1 TIME: Tue Jun 14 09:07:44 2011

RD ILLUMINA-E6F4B9:7:71:17827:4598#0/1 22 0 0
GTTAAAGAGGACTGGAGATACA

QA 1 22 1 22
DS VERSION: 1 TIME: Tue Jun 14 09:07:44 2011

RD ILLUMINA-E6F4B9:7:74:18907:6026#0/1 22 0 0
GTTAAAGAGGACTGGAGATACA

QA 1 22 1 22
DS VERSION: 1 TIME: Tue Jun 14 09:07:44 2011

RD ILLUMINA-E6F4B9:7:77:8236:18893#0/1 24 0 0
GTTAAAGAGGACTGGAGATACATC

QA 1 24 1 24
DS VERSION: 1 TIME: Tue Jun 14 09:07:44 2011

RD ILLUMINA-E6F4B9:7:78:7397:10505#0/1 20 0 0
GTTAAAGAGGACTGGAGATA

QA 1 20 1 20
DS VERSION: 1 TIME: Tue Jun 14 09:07:44 2011

RD ILLUMINA-E6F4B9:7:79:15672:19184#0/1 20 0 0
GTTAAAGAGGACTGGAGATA

QA 1 20 1 20
DS VERSION: 1 TIME: Tue Jun 14 09:07:44 2011

RD ILLUMINA-E6F4B9:7:81:8814:18004#0/1 23 0 0
GTTAAAGAGGACTGGAGATACAT

QA 1 23 1 23
DS VERSION: 1 TIME: Tue Jun 14 09:07:44 2011

RD ILLUMINA-E6F4B9:7:82:8933:17437#0/1 27 0 0
GTTAAGGAGGACTGGAGATACATCGCC

QA 1 27 1 27
DS VERSION: 1 TIME: Tue Jun 14 09:07:44 2011

RD ILLUMINA-E6F4B9:7:86:4770:21211#0/1 24 0 0
GTTAAAGAGGACTGGAGATACATC

QA 1 24 1 24
DS VERSION: 1 TIME: Tue Jun 14 09:07:44 2011

RD ILLUMINA-E6F4B9:7:87:12921:9869#0/1 20 0 0
GTTAAAGAGGACTGGAGATA

QA 1 20 1 20
DS VERSION: 1 TIME: Tue Jun 14 09:07:44 2011

RD ILLUMINA-E6F4B9:7:90:14312:4118#0/1 23 0 0
GTTAAAGAGGACTGGAGATACAT

QA 1 23 1 23
DS VERSION: 1 TIME: Tue Jun 14 09:07:44 2011

RD ILLUMINA-E6F4B9:7:91:16818:20067#0/1 24 0 0
GTTAAAGAGGACTGGAGATACATC

QA 1 24 1 24
DS VERSION: 1 TIME: Tue Jun 14 09:07:44 2011

RD ILLUMINA-E6F4B9:7:92:2004:13122#0/1 20 0 0
GTTAAAGAGGACTGGAGATA

QA 1 20 1 20
DS VERSION: 1 TIME: Tue Jun 14 09:07:44 2011

RD ILLUMINA-E6F4B9:7:93:2528:1334#0/1 24 0 0
GTTAAAGAGGACTGGAGATACATC

QA 1 24 1 24
DS VERSION: 1 TIME: Tue Jun 14 09:07:44 2011

RD ILLUMINA-E6F4B9:7:93:4090:16645#0/1 23 0 0
GTTAAAGAGGACTGGAGATACAT

QA 1 23 1 23
DS VERSION: 1 TIME: Tue Jun 14 09:07:44 2011

RD ILLUMINA-E6F4B9:7:97:12491:20832#0/1 27 0 0
GTTAAAGAGGACTGGAGATACATCGCC

QA 1 27 1 27
DS VERSION: 1 TIME: Tue Jun 14 09:07:44 2011

RD ILLUMINA-E6F4B9:7:98:12941:19404#0/1 25 0 0
GTTAAAGAGGACTGGAGATACATCG

QA 1 25 1 25
DS VERSION: 1 TIME: Tue Jun 14 09:07:44 2011

RD ILLUMINA-E6F4B9:7:99:14469:1815#0/1 22 0 0
GTTAAAGAGGACTGGAGATACA

QA 1 22 1 22
DS VERSION: 1 TIME: Tue Jun 14 09:07:44 2011

RD ILLUMINA-E6F4B9:7:102:13467:3229#0/1 24 0 0
GTTAAAGAGGACTGGAGATACATC

QA 1 24 1 24
DS VERSION: 1 TIME: Tue Jun 14 09:07:44 2011

RD ILLUMINA-E6F4B9:7:104:17247:18509#0/1 27 0 0
GTTAAAGAGGACTGGAGATACATCGCC

QA 1 27 1 27
DS VERSION: 1 TIME: Tue Jun 14 09:07:44 2011

RD ILLUMINA-E6F4B9:7:111:2757:9046#0/1 24 0 0
GTTAAAGAGGACTGGAGATACATC

QA 1 24 1 24
DS VERSION: 1 TIME: Tue Jun 14 09:07:44 2011

RD ILLUMINA-E6F4B9:7:111:3559:10896#0/1 20 0 0
GTTAAAGAGGACTGGAGATA

QA 1 20 1 20
DS VERSION: 1 TIME: Tue Jun 14 09:07:44 2011

RD ILLUMINA-E6F4B9:7:114:11134:2052#0/1 23 0 0
GTTAAAGAGGACTGGAGATACAT

QA 1 23 1 23
DS VERSION: 1 TIME: Tue Jun 14 09:07:44 2011

RD ILLUMINA-E6F4B9:7:116:5209:7213#0/1 26 0 0
GTTAAAGAGGACTGGAGATACATCGC

QA 1 26 1 26
DS VERSION: 1 TIME: Tue Jun 14 09:07:44 2011

RD ILLUMINA-E6F4B9:7:116:5467:9313#0/1 20 0 0
GTTAAAGAGGACTGGAGATA

QA 1 20 1 20
DS VERSION: 1 TIME: Tue Jun 14 09:07:44 2011

RD ILLUMINA-E6F4B9:7:120:12385:5909#0/1 22 0 0
GTTAAAGAGGACTGGAGATACA

QA 1 22 1 22
DS VERSION: 1 TIME: Tue Jun 14 09:07:44 2011

RD ILLUMINA-E6F4B9:7:26:17324:20679#0/1 22 0 0
ATTAAAGAGGACTGGAGATACA

QA 1 22 2 22
DS VERSION: 1 TIME: Tue Jun 14 09:07:44 2011

RD ILLUMINA-E6F4B9:7:1:11809:14005#0/1 19 0 0
TTAAAGAGGACTGGAGATA

QA 1 19 1 19
DS VERSION: 1 TIME: Tue Jun 14 09:07:44 2011

RD ILLUMINA-E6F4B9:7:4:13294:13575#0/1 21 0 0
TTAAAGAGGACTGGAGATACA

QA 1 21 1 21
DS VERSION: 1 TIME: Tue Jun 14 09:07:44 2011

RD ILLUMINA-E6F4B9:7:16:14152:16260#0/1 21 0 0
TTAAAGAGGACTGGAGATACA

QA 1 21 1 21
DS VERSION: 1 TIME: Tue Jun 14 09:07:44 2011

RD ILLUMINA-E6F4B9:7:17:12841:14547#0/1 27 0 0
TTAAAGAGGACTGGAGATACATCGCCA

QA 1 27 1 27
DS VERSION: 1 TIME: Tue Jun 14 09:07:44 2011

RD ILLUMINA-E6F4B9:7:25:18238:20290#0/1 21 0 0
TTAAAGAGGACTGGAGATACA

QA 1 21 1 21
DS VERSION: 1 TIME: Tue Jun 14 09:07:44 2011

RD ILLUMINA-E6F4B9:7:27:6463:13896#0/1 23 0 0
TTAAAGAGGACTGGAGATACATC

QA 1 23 1 23
DS VERSION: 1 TIME: Tue Jun 14 09:07:44 2011

RD ILLUMINA-E6F4B9:7:27:11108:18103#0/1 23 0 0
TTAAAGAGGACTGGAGATACATC

QA 1 23 1 23
DS VERSION: 1 TIME: Tue Jun 14 09:07:44 2011

RD ILLUMINA-E6F4B9:7:28:12492:13041#0/1 21 0 0
TTAAAGAGGACTGGAGATACA

QA 1 21 1 21
DS VERSION: 1 TIME: Tue Jun 14 09:07:44 2011

RD ILLUMINA-E6F4B9:7:28:12986:14072#0/1 19 0 0
TTAAAGAGGACTGGAGATA

QA 1 19 1 19
DS VERSION: 1 TIME: Tue Jun 14 09:07:44 2011

RD ILLUMINA-E6F4B9:7:30:15669:13223#0/1 26 0 0
TTAAAGAGGACTGGAGATACATCGCC

QA 1 26 1 26
DS VERSION: 1 TIME: Tue Jun 14 09:07:44 2011

RD ILLUMINA-E6F4B9:7:32:8869:15952#0/1 23 0 0
TTAAAGAGGACTGGAGATACATC

QA 1 23 1 23
DS VERSION: 1 TIME: Tue Jun 14 09:07:44 2011

RD ILLUMINA-E6F4B9:7:35:6774:10541#0/1 21 0 0
TTAAAGAGGACTGGAGATACA

QA 1 21 1 21
DS VERSION: 1 TIME: Tue Jun 14 09:07:44 2011

RD ILLUMINA-E6F4B9:7:36:3375:12489#0/1 21 0 0
TTAAAGAGGACTGGAGATACA

QA 1 21 1 21
DS VERSION: 1 TIME: Tue Jun 14 09:07:44 2011

RD ILLUMINA-E6F4B9:7:37:3132:4656#0/1 22 0 0
TTAAAGAGGACTGGAGATACAT

QA 1 22 1 22
DS VERSION: 1 TIME: Tue Jun 14 09:07:44 2011

RD ILLUMINA-E6F4B9:7:37:13268:12146#0/1 29 0 0
TTAAAGAGGACTGGAGATACATCGCCACA

QA 1 29 1 29
DS VERSION: 1 TIME: Tue Jun 14 09:07:44 2011

RD ILLUMINA-E6F4B9:7:40:18520:3022#0/1 21 0 0
TTAAAGAGGACTGGAGATACA

QA 1 21 1 21
DS VERSION: 1 TIME: Tue Jun 14 09:07:44 2011

RD ILLUMINA-E6F4B9:7:41:13410:7964#0/1 23 0 0
TTAAAGAGGACTGGAGATACATC

QA 1 23 1 23
DS VERSION: 1 TIME: Tue Jun 14 09:07:44 2011

RD ILLUMINA-E6F4B9:7:42:13068:6132#0/1 23 0 0
TTAAAGAGGACTGGAGATACATC

QA 1 23 1 23
DS VERSION: 1 TIME: Tue Jun 14 09:07:44 2011

RD ILLUMINA-E6F4B9:7:44:3901:1287#0/1 29 0 0
TTAAAGAGGACTGGAGATACATCGCCACA

QA 1 29 1 29
DS VERSION: 1 TIME: Tue Jun 14 09:07:44 2011

RD ILLUMINA-E6F4B9:7:50:16148:12627#0/1 20 0 0
TTAAAGAGGACTGGAGATAC

QA 1 20 1 20
DS VERSION: 1 TIME: Tue Jun 14 09:07:44 2011

RD ILLUMINA-E6F4B9:7:59:5794:3988#0/1 21 0 0
TTAAAGAGGACTGGAGATACA

QA 1 21 1 21
DS VERSION: 1 TIME: Tue Jun 14 09:07:44 2011

RD ILLUMINA-E6F4B9:7:66:2790:19635#0/1 21 0 0
TTAAAGAGGACTGGAGATACA

QA 1 21 1 21
DS VERSION: 1 TIME: Tue Jun 14 09:07:44 2011

RD ILLUMINA-E6F4B9:7:67:3502:15531#0/1 24 0 0
TTAAAGAGGACTGGAGATACATCG

QA 1 24 1 24
DS VERSION: 1 TIME: Tue Jun 14 09:07:44 2011

RD ILLUMINA-E6F4B9:7:73:18678:18353#0/1 21 0 0
TTAAAGAGGACTGGAGATACA

QA 1 21 1 21
DS VERSION: 1 TIME: Tue Jun 14 09:07:44 2011

RD ILLUMINA-E6F4B9:7:77:7156:6126#0/1 23 0 0
TTAAAGAGGACTGGAGATACATC

QA 1 23 1 23
DS VERSION: 1 TIME: Tue Jun 14 09:07:44 2011

RD ILLUMINA-E6F4B9:7:77:2909:19295#0/1 26 0 0
TTAAAGAGGACTGGAGATACATCGCC

QA 1 26 1 26
DS VERSION: 1 TIME: Tue Jun 14 09:07:44 2011

RD ILLUMINA-E6F4B9:7:80:14325:17316#0/1 21 0 0
TTAAAGAGGACTGGAGATACA

QA 1 21 1 21
DS VERSION: 1 TIME: Tue Jun 14 09:07:44 2011

RD ILLUMINA-E6F4B9:7:81:7533:3992#0/1 23 0 0
TTAAAGAGGACTGGAGATACATC

QA 1 23 1 23
DS VERSION: 1 TIME: Tue Jun 14 09:07:44 2011

RD ILLUMINA-E6F4B9:7:86:3569:7555#0/1 23 0 0
TTAAAGAGGACTGGAGATACATC

QA 1 23 1 23
DS VERSION: 1 TIME: Tue Jun 14 09:07:44 2011

RD ILLUMINA-E6F4B9:7:87:7820:8709#0/1 23 0 0
TTAAAGAGGACTGGAGCTACATC

QA 1 23 1 23
DS VERSION: 1 TIME: Tue Jun 14 09:07:44 2011

RD ILLUMINA-E6F4B9:7:92:10720:19257#0/1 23 0 0
TTAAAGAGGACTGGAGATACATC

QA 1 23 1 23
DS VERSION: 1 TIME: Tue Jun 14 09:07:44 2011

RD ILLUMINA-E6F4B9:7:95:10500:9340#0/1 26 0 0
TTAAAGAGGACTGGAGATACATCGCC

QA 1 26 1 26
DS VERSION: 1 TIME: Tue Jun 14 09:07:44 2011

RD ILLUMINA-E6F4B9:7:100:4066:20045#0/1 19 0 0
TTAAAGAGGACTGGAGATA

QA 1 19 1 19
DS VERSION: 1 TIME: Tue Jun 14 09:07:44 2011

RD ILLUMINA-E6F4B9:7:102:15653:11068#0/1 21 0 0
TTAAAGAGGACTGGAGATACA

QA 1 21 1 21
DS VERSION: 1 TIME: Tue Jun 14 09:07:44 2011

RD ILLUMINA-E6F4B9:7:104:5002:13412#0/1 21 0 0
TTAAAGAGGACTGGAGATACA

QA 1 21 1 21
DS VERSION: 1 TIME: Tue Jun 14 09:07:44 2011

RD ILLUMINA-E6F4B9:7:105:1834:1298#0/1 26 0 0
TTAAAGAGGACTGGAGATACATCGCC

QA 1 26 1 26
DS VERSION: 1 TIME: Tue Jun 14 09:07:44 2011

RD ILLUMINA-E6F4B9:7:109:17524:6643#0/1 26 0 0
TTAAAGAGGACTGGAGATACATCGCC

QA 1 26 1 26
DS VERSION: 1 TIME: Tue Jun 14 09:07:44 2011

RD ILLUMINA-E6F4B9:7:116:11069:18875#0/1 23 0 0
TTAAAGAGGACTGGAGATACATC

QA 1 23 1 23
DS VERSION: 1 TIME: Tue Jun 14 09:07:44 2011

RD ILLUMINA-E6F4B9:7:74:16483:19806#0/1 20 0 0
GATAAAGAGGACTGGAGATA

QA 1 20 3 20
DS VERSION: 1 TIME: Tue Jun 14 09:07:44 2011

RD ILLUMINA-E6F4B9:7:2:5655:18045#0/1 25 0 0
TAAAGAGGACTGGAGATACATCGCC

QA 1 25 1 25
DS VERSION: 1 TIME: Tue Jun 14 09:07:44 2011

RD ILLUMINA-E6F4B9:7:13:5301:4927#0/1 20 0 0
TAAAGAGGACTGGAGATACA

QA 1 20 1 20
DS VERSION: 1 TIME: Tue Jun 14 09:07:44 2011

RD ILLUMINA-E6F4B9:7:23:19594:3033#0/1 21 0 0
TAAAGAGGACTGGAGATACAT

QA 1 21 1 21
DS VERSION: 1 TIME: Tue Jun 14 09:07:44 2011

RD ILLUMINA-E6F4B9:7:25:14606:3603#0/1 21 0 0
TAAAGAGGACTGGAGATACAT

QA 1 21 1 21
DS VERSION: 1 TIME: Tue Jun 14 09:07:44 2011

RD ILLUMINA-E6F4B9:7:31:19017:1503#0/1 22 0 0
TAAAGAGGACTGGAGATACATC

QA 1 22 1 22
DS VERSION: 1 TIME: Tue Jun 14 09:07:44 2011

RD ILLUMINA-E6F4B9:7:31:8921:8529#0/1 22 0 0
TAAAGAGGACTGGAGATACATC

QA 1 22 1 22
DS VERSION: 1 TIME: Tue Jun 14 09:07:44 2011

RD ILLUMINA-E6F4B9:7:35:14866:13093#0/1 22 0 0
TAAAGAGGACTGGAGATACATC

QA 1 22 1 22
DS VERSION: 1 TIME: Tue Jun 14 09:07:44 2011

RD ILLUMINA-E6F4B9:7:37:17590:19287#0/1 18 0 0
TAAAGAGGACTGGAGATA

QA 1 18 1 18
DS VERSION: 1 TIME: Tue Jun 14 09:07:44 2011

RD ILLUMINA-E6F4B9:7:40:5958:4484#0/1 28 0 0
TAAAGAGGACTGGAGATACATCGCCATA

QA 1 28 1 26
DS VERSION: 1 TIME: Tue Jun 14 09:07:44 2011

RD ILLUMINA-E6F4B9:7:40:3493:19455#0/1 22 0 0
TAAAGAGGACTGGAGATACATT

QA 1 22 1 21
DS VERSION: 1 TIME: Tue Jun 14 09:07:44 2011

RD ILLUMINA-E6F4B9:7:42:15930:10303#0/1 22 0 0
TAAAGAGGACTGGAGATACATC

QA 1 22 1 22
DS VERSION: 1 TIME: Tue Jun 14 09:07:44 2011

RD ILLUMINA-E6F4B9:7:43:19017:2410#0/1 20 0 0
TAAAGAGGACTGGAGATACA

QA 1 20 1 20
DS VERSION: 1 TIME: Tue Jun 14 09:07:44 2011

RD ILLUMINA-E6F4B9:7:43:12707:3409#0/1 22 0 0
TAAAGAGGACTGGAGATACATC

QA 1 22 1 22
DS VERSION: 1 TIME: Tue Jun 14 09:07:44 2011

RD ILLUMINA-E6F4B9:7:45:7425:13975#0/1 18 0 0
TAAAGAGGACTGGAGATA

QA 1 18 1 18
DS VERSION: 1 TIME: Tue Jun 14 09:07:44 2011

RD ILLUMINA-E6F4B9:7:47:13818:11639#0/1 21 0 0
TAAAGAGGACTGGAGATACAT

QA 1 21 1 21
DS VERSION: 1 TIME: Tue Jun 14 09:07:44 2011

RD ILLUMINA-E6F4B9:7:51:14747:14517#0/1 21 0 0
TAAAGAGGACTGGAGATACAT

QA 1 21 1 21
DS VERSION: 1 TIME: Tue Jun 14 09:07:44 2011

RD ILLUMINA-E6F4B9:7:54:16864:13803#0/1 25 0 0
TAAAGAGGACTGGAGATACATCGCC

QA 1 25 1 25
DS VERSION: 1 TIME: Tue Jun 14 09:07:44 2011

RD ILLUMINA-E6F4B9:7:59:10071:6064#0/1 18 0 0
TAAAGAGGACTGGAGATG

QA 1 18 1 17
DS VERSION: 1 TIME: Tue Jun 14 09:07:44 2011

RD ILLUMINA-E6F4B9:7:60:11577:16203#0/1 22 0 0
TAAAGAGGACTGGAGATACATC

QA 1 22 1 22
DS VERSION: 1 TIME: Tue Jun 14 09:07:44 2011

RD ILLUMINA-E6F4B9:7:61:17180:1347#0/1 20 0 0
TAAAGAGGACTGGAGATACG

QA 1 20 1 19
DS VERSION: 1 TIME: Tue Jun 14 09:07:44 2011

RD ILLUMINA-E6F4B9:7:64:13224:6566#0/1 21 0 0
TAAAGAGGACTGGAGATACAT

QA 1 21 1 21
DS VERSION: 1 TIME: Tue Jun 14 09:07:44 2011

RD ILLUMINA-E6F4B9:7:65:4139:6388#0/1 20 0 0
TAAAGAGGACTGGAGATACA

QA 1 20 1 20
DS VERSION: 1 TIME: Tue Jun 14 09:07:44 2011

RD ILLUMINA-E6F4B9:7:67:9390:18943#0/1 25 0 0
TAAAGAGGACTGGAGATACATCGCC

QA 1 25 1 25
DS VERSION: 1 TIME: Tue Jun 14 09:07:44 2011

RD ILLUMINA-E6F4B9:7:68:6476:2543#0/1 22 0 0
TAAAGAGGACTGGAGATACATC

QA 1 22 1 22
DS VERSION: 1 TIME: Tue Jun 14 09:07:44 2011

RD ILLUMINA-E6F4B9:7:68:8472:4937#0/1 20 0 0
TAAAGAGGACTGGAGATACA

QA 1 20 1 20
DS VERSION: 1 TIME: Tue Jun 14 09:07:44 2011

RD ILLUMINA-E6F4B9:7:68:14412:11295#0/1 25 0 0
TAAAGAGGACTGGAGATACATCGCC

QA 1 25 1 25
DS VERSION: 1 TIME: Tue Jun 14 09:07:44 2011

RD ILLUMINA-E6F4B9:7:83:11681:4643#0/1 21 0 0
TAAAGAGGACTGGAGATACAT

QA 1 21 1 21
DS VERSION: 1 TIME: Tue Jun 14 09:07:44 2011

RD ILLUMINA-E6F4B9:7:88:14716:10027#0/1 22 0 0
TAAAGAGGACTGGAGATACATC

QA 1 22 1 22
DS VERSION: 1 TIME: Tue Jun 14 09:07:44 2011

RD ILLUMINA-E6F4B9:7:96:18309:3470#0/1 22 0 0
TAAAGAGGACTGGAGATACATC

QA 1 22 1 22
DS VERSION: 1 TIME: Tue Jun 14 09:07:44 2011

RD ILLUMINA-E6F4B9:7:96:15744:13230#0/1 22 0 0
TAAAGAGGACTGGAGATACATC

QA 1 22 1 22
DS VERSION: 1 TIME: Tue Jun 14 09:07:44 2011

RD ILLUMINA-E6F4B9:7:98:16354:16773#0/1 22 0 0
TAAAGAGGACTGGAGATACATC

QA 1 22 1 22
DS VERSION: 1 TIME: Tue Jun 14 09:07:44 2011

RD ILLUMINA-E6F4B9:7:99:3524:15902#0/1 18 0 0
TAAAGAGGACTGGAGATA

QA 1 18 1 18
DS VERSION: 1 TIME: Tue Jun 14 09:07:44 2011

RD ILLUMINA-E6F4B9:7:100:18126:20869#0/1 22 0 0
TAAAGAGGACTGGAGATACATC

QA 1 22 1 22
DS VERSION: 1 TIME: Tue Jun 14 09:07:44 2011

RD ILLUMINA-E6F4B9:7:103:8696:4110#0/1 20 0 0
TAAAGAGGACTGGAGATACA

QA 1 20 1 20
DS VERSION: 1 TIME: Tue Jun 14 09:07:44 2011

RD ILLUMINA-E6F4B9:7:106:4601:3613#0/1 24 0 0
TAAAGAGGACTGGAGATACATCGT

QA 1 24 1 23
DS VERSION: 1 TIME: Tue Jun 14 09:07:44 2011

RD ILLUMINA-E6F4B9:7:107:18514:19164#0/1 24 0 0
TAAAGAGGACTGGAGATACATCGC

QA 1 24 1 24
DS VERSION: 1 TIME: Tue Jun 14 09:07:44 2011

RD ILLUMINA-E6F4B9:7:113:4429:11316#0/1 18 0 0
TAAAGAGGACTGGAGATA

QA 1 18 1 18
DS VERSION: 1 TIME: Tue Jun 14 09:07:44 2011

RD ILLUMINA-E6F4B9:7:118:15377:6752#0/1 20 0 0
TAAAGAGGACTGGAGATACA

QA 1 20 1 20
DS VERSION: 1 TIME: Tue Jun 14 09:07:44 2011

RD ILLUMINA-E6F4B9:7:118:11980:16209#0/1 25 0 0
TAAAGAGGACTGGAGATACATCGCC

QA 1 25 1 25
DS VERSION: 1 TIME: Tue Jun 14 09:07:44 2011

RD ILLUMINA-E6F4B9:7:2:5108:15380#0/1 21 0 0
AAAGAGGACTGGAGATACATC

QA 1 21 1 21
DS VERSION: 1 TIME: Tue Jun 14 09:07:44 2011

RD ILLUMINA-E6F4B9:7:6:3499:20579#0/1 20 0 0
AAAGAGGACTGGAGATACAT

QA 1 20 1 20
DS VERSION: 1 TIME: Tue Jun 14 09:07:44 2011

RD ILLUMINA-E6F4B9:7:6:17618:20940#0/1 21 0 0
AAAGAGGACTGGAGATACATC

QA 1 21 1 21
DS VERSION: 1 TIME: Tue Jun 14 09:07:44 2011

RD ILLUMINA-E6F4B9:7:10:11258:8994#0/1 21 0 0
AAAGAGGACTGGAGATACATC

QA 1 21 1 21
DS VERSION: 1 TIME: Tue Jun 14 09:07:44 2011

RD ILLUMINA-E6F4B9:7:17:16444:19303#0/1 21 0 0
AAAGAGGACTGGAGATACATC

QA 1 21 1 21
DS VERSION: 1 TIME: Tue Jun 14 09:07:44 2011

RD ILLUMINA-E6F4B9:7:18:2902:14733#0/1 27 0 0
AAAGAGGACTGGAGATACATCGCCACA

QA 1 27 1 27
DS VERSION: 1 TIME: Tue Jun 14 09:07:44 2011

RD ILLUMINA-E6F4B9:7:21:11868:3115#0/1 21 0 0
AAAGAGGACTGGAGATACATC

QA 1 21 1 21
DS VERSION: 1 TIME: Tue Jun 14 09:07:44 2011

RD ILLUMINA-E6F4B9:7:21:3673:10501#0/1 21 0 0
AAAGAGGACTGGAGATACATC

QA 1 21 1 21
DS VERSION: 1 TIME: Tue Jun 14 09:07:44 2011

RD ILLUMINA-E6F4B9:7:26:13357:10082#0/1 19 0 0
AAAGAGGACTGGAGATACA

QA 1 19 1 19
DS VERSION: 1 TIME: Tue Jun 14 09:07:44 2011

RD ILLUMINA-E6F4B9:7:28:15701:15529#0/1 24 0 0
AAAGAGGACTGGAGATACATCGCC

QA 1 24 1 24
DS VERSION: 1 TIME: Tue Jun 14 09:07:44 2011

RD ILLUMINA-E6F4B9:7:28:6360:16965#0/1 22 0 0
AAAGAGGACTGGAGATACATCT

QA 1 22 1 21
DS VERSION: 1 TIME: Tue Jun 14 09:07:44 2011

RD ILLUMINA-E6F4B9:7:30:11727:17460#0/1 21 0 0
AAAGAGGACTGGAGATACATC

QA 1 21 1 21
DS VERSION: 1 TIME: Tue Jun 14 09:07:44 2011

RD ILLUMINA-E6F4B9:7:32:6980:9702#0/1 19 0 0
AAAGAGGACTGGAGATACA

QA 1 19 1 19
DS VERSION: 1 TIME: Tue Jun 14 09:07:44 2011

RD ILLUMINA-E6F4B9:7:33:18090:7494#0/1 19 0 0
AAAGAGGACTGGAGATACA

QA 1 19 1 19
DS VERSION: 1 TIME: Tue Jun 14 09:07:44 2011

RD ILLUMINA-E6F4B9:7:38:17402:10307#0/1 27 0 0
AAAGAGGACTGGAGATACATCGCCACA

QA 1 27 1 27
DS VERSION: 1 TIME: Tue Jun 14 09:07:44 2011

RD ILLUMINA-E6F4B9:7:39:15958:6419#0/1 19 0 0
AAAGAGGACTGGAGATACA

QA 1 19 1 19
DS VERSION: 1 TIME: Tue Jun 14 09:07:44 2011

RD ILLUMINA-E6F4B9:7:40:17459:1230#0/1 19 0 0
AAAGAGGACTGGAGATACA

QA 1 19 1 19
DS VERSION: 1 TIME: Tue Jun 14 09:07:44 2011

RD ILLUMINA-E6F4B9:7:42:19021:8748#0/1 27 0 0
AAAGAGGACTGGAGATACATCGCCACA

QA 1 27 1 27
DS VERSION: 1 TIME: Tue Jun 14 09:07:44 2011

RD ILLUMINA-E6F4B9:7:52:3072:11790#0/1 24 0 0
AAAGAGGACTGGAGATACATCGCC

QA 1 24 1 24
DS VERSION: 1 TIME: Tue Jun 14 09:07:44 2011

RD ILLUMINA-E6F4B9:7:55:11028:12072#0/1 22 0 0
AAAGAGGACTGGAGATACATCG

QA 1 22 1 22
DS VERSION: 1 TIME: Tue Jun 14 09:07:44 2011

RD ILLUMINA-E6F4B9:7:58:4340:20120#0/1 23 0 0
AAAGAGGACTGGAGATACATCGC

QA 1 23 1 23
DS VERSION: 1 TIME: Tue Jun 14 09:07:44 2011

RD ILLUMINA-E6F4B9:7:59:8304:5360#0/1 27 0 0
AAAGAGGACTGGAGATACATCGCCACA

QA 1 27 1 27
DS VERSION: 1 TIME: Tue Jun 14 09:07:44 2011

RD ILLUMINA-E6F4B9:7:63:1839:19160#0/1 19 0 0
AAAGAGGACTGGAGATACA

QA 1 19 1 19
DS VERSION: 1 TIME: Tue Jun 14 09:07:44 2011

RD ILLUMINA-E6F4B9:7:65:7821:18025#0/1 24 0 0
AAAGAGGACTGGAGATACATCGCC

QA 1 24 1 24
DS VERSION: 1 TIME: Tue Jun 14 09:07:44 2011

RD ILLUMINA-E6F4B9:7:67:9682:15241#0/1 23 0 0
AAAGAGGACTGGAGATACATCGC

QA 1 23 1 23
DS VERSION: 1 TIME: Tue Jun 14 09:07:44 2011

RD ILLUMINA-E6F4B9:7:68:4932:20681#0/1 27 0 0
AAAGAGGACTGGAGATACATCGCCACA

QA 1 27 1 27
DS VERSION: 1 TIME: Tue Jun 14 09:07:44 2011

RD ILLUMINA-E6F4B9:7:72:13119:5727#0/1 19 0 0
AAAGAGGACTGGAGATACA

QA 1 19 1 19
DS VERSION: 1 TIME: Tue Jun 14 09:07:44 2011

RD ILLUMINA-E6F4B9:7:74:15320:21126#0/1 19 0 0
AAAGAGGACTGGAGATACA

QA 1 19 1 19
DS VERSION: 1 TIME: Tue Jun 14 09:07:44 2011

RD ILLUMINA-E6F4B9:7:75:3950:1382#0/1 24 0 0
AAAGAGGACTGGAGATACATCGCC

QA 1 24 1 24
DS VERSION: 1 TIME: Tue Jun 14 09:07:44 2011

RD ILLUMINA-E6F4B9:7:79:15644:16800#0/1 23 0 0
AAAGAGGACTGGAGATACATCGC

QA 1 23 1 23
DS VERSION: 1 TIME: Tue Jun 14 09:07:44 2011

RD ILLUMINA-E6F4B9:7:82:6335:9035#0/1 19 0 0
AAAGAGGACTGGAGATACA

QA 1 19 1 19
DS VERSION: 1 TIME: Tue Jun 14 09:07:44 2011

RD ILLUMINA-E6F4B9:7:84:10257:6457#0/1 22 0 0
AAAGAGGACTGGAGATCCATCG

QA 1 22 1 22
DS VERSION: 1 TIME: Tue Jun 14 09:07:44 2011

RD ILLUMINA-E6F4B9:7:84:15300:9491#0/1 24 0 0
AAAGAGGACTGGAGATACATCGCC

QA 1 24 1 24
DS VERSION: 1 TIME: Tue Jun 14 09:07:44 2011

RD ILLUMINA-E6F4B9:7:93:7298:16445#0/1 19 0 0
AAAGAGGACTGGAGATACA

QA 1 19 1 19
DS VERSION: 1 TIME: Tue Jun 14 09:07:44 2011

RD ILLUMINA-E6F4B9:7:94:18302:1172#0/1 21 0 0
AAAGAGGACTGGAGATACATC

QA 1 21 1 21
DS VERSION: 1 TIME: Tue Jun 14 09:07:44 2011

RD ILLUMINA-E6F4B9:7:95:4457:9997#0/1 23 0 0
AAAGAGGACTGGAGATACATCGC

QA 1 23 1 23
DS VERSION: 1 TIME: Tue Jun 14 09:07:44 2011

RD ILLUMINA-E6F4B9:7:100:12224:16471#0/1 24 0 0
AAAGAGGACTGGAGATACATCGCC

QA 1 24 1 24
DS VERSION: 1 TIME: Tue Jun 14 09:07:44 2011

RD ILLUMINA-E6F4B9:7:101:2288:6407#0/1 19 0 0
AAAGAGGACTGGAGATACA

QA 1 19 1 19
DS VERSION: 1 TIME: Tue Jun 14 09:07:44 2011

RD ILLUMINA-E6F4B9:7:103:10195:3328#0/1 24 0 0
AAAGAGGACTGGAGATACATCGCC

QA 1 24 1 24
DS VERSION: 1 TIME: Tue Jun 14 09:07:44 2011

RD ILLUMINA-E6F4B9:7:105:7477:3123#0/1 21 0 0
AAAGAGGACTGGAGATACATC

QA 1 21 1 21
DS VERSION: 1 TIME: Tue Jun 14 09:07:44 2011

RD ILLUMINA-E6F4B9:7:105:12128:4657#0/1 25 0 0
AAAGAGGACTGGAGATACATCGCCA

QA 1 25 1 25
DS VERSION: 1 TIME: Tue Jun 14 09:07:44 2011

RD ILLUMINA-E6F4B9:7:105:18431:12720#0/1 21 0 0
AAAGAGGACTGGAGATACATC

QA 1 21 1 21
DS VERSION: 1 TIME: Tue Jun 14 09:07:44 2011

RD ILLUMINA-E6F4B9:7:110:3152:3278#0/1 27 0 0
AAAGAGGACTGGAGATACATCGCCACA

QA 1 27 1 27
DS VERSION: 1 TIME: Tue Jun 14 09:07:44 2011

RD ILLUMINA-E6F4B9:7:112:15419:4365#0/1 23 0 0
AAAGAGGACTGGAGATACATCGC

QA 1 23 1 23
DS VERSION: 1 TIME: Tue Jun 14 09:07:44 2011

RD ILLUMINA-E6F4B9:7:112:18533:5540#0/1 19 0 0
AAAGAGGACTGGAGATACA

QA 1 19 1 19
DS VERSION: 1 TIME: Tue Jun 14 09:07:44 2011

RD ILLUMINA-E6F4B9:7:113:10886:11229#0/1 19 0 0
AAAGAGGACTGGAGATACA

QA 1 19 1 19
DS VERSION: 1 TIME: Tue Jun 14 09:07:44 2011

RD ILLUMINA-E6F4B9:7:119:13321:6343#0/1 21 0 0
AAAGAGGACTGGAGATACATC

QA 1 21 1 21
DS VERSION: 1 TIME: Tue Jun 14 09:07:44 2011

RD ILLUMINA-E6F4B9:7:42:5736:1236#0/1 21 0 0
GAAGAGGACTGGAGATACATC

QA 1 21 2 21
DS VERSION: 1 TIME: Tue Jun 14 09:07:44 2011

RD ILLUMINA-E6F4B9:7:6:7381:17500#0/1 24 0 0
AAGAGGACTGGAGATACATCGCCA

QA 1 24 1 24
DS VERSION: 1 TIME: Tue Jun 14 09:07:44 2011

RD ILLUMINA-E6F4B9:7:6:18792:19599#0/1 23 0 0
AAGAGGACTGGAGATACATCGCC

QA 1 23 1 23
DS VERSION: 1 TIME: Tue Jun 14 09:07:44 2011

RD ILLUMINA-E6F4B9:7:7:9170:6570#0/1 23 0 0
AAGAGGACTGGAGATACATCGCC

QA 1 23 1 23
DS VERSION: 1 TIME: Tue Jun 14 09:07:44 2011

RD ILLUMINA-E6F4B9:7:7:1154:19219#0/1 26 0 0
AAGAGGACTGGAGATACATCGCCACA

QA 1 26 1 26
DS VERSION: 1 TIME: Tue Jun 14 09:07:44 2011

RD ILLUMINA-E6F4B9:7:8:3270:5928#0/1 19 0 0
AAGAGGACTGGAGATACAT

QA 1 19 1 19
DS VERSION: 1 TIME: Tue Jun 14 09:07:44 2011

RD ILLUMINA-E6F4B9:7:11:6538:7238#0/1 26 0 0
AAGAGGACTGGAGATACATCGCCACA

QA 1 26 1 26
DS VERSION: 1 TIME: Tue Jun 14 09:07:44 2011

RD ILLUMINA-E6F4B9:7:14:17121:7666#0/1 20 0 0
AAGAGGACTGGAGATACATC

QA 1 20 1 20
DS VERSION: 1 TIME: Tue Jun 14 09:07:44 2011

RD ILLUMINA-E6F4B9:7:15:10662:5150#0/1 18 0 0
AAGAGGACTGGAGATACA

QA 1 18 1 18
DS VERSION: 1 TIME: Tue Jun 14 09:07:44 2011

RD ILLUMINA-E6F4B9:7:17:12266:18765#0/1 18 0 0
AAGAGGACTGGAGATACA

QA 1 18 1 18
DS VERSION: 1 TIME: Tue Jun 14 09:07:44 2011

RD ILLUMINA-E6F4B9:7:24:11168:11532#0/1 23 0 0
AAGAGGACTGGAGATACATCGCC

QA 1 23 1 23
DS VERSION: 1 TIME: Tue Jun 14 09:07:44 2011

RD ILLUMINA-E6F4B9:7:26:6897:4115#0/1 22 0 0
AAGAGGACTGGAGATACATCGC

QA 1 22 1 22
DS VERSION: 1 TIME: Tue Jun 14 09:07:44 2011

RD ILLUMINA-E6F4B9:7:26:5900:14353#0/1 29 0 0
AAGAGGACTGGAGATACATCGCCACAACC

QA 1 29 1 29
DS VERSION: 1 TIME: Tue Jun 14 09:07:44 2011

RD ILLUMINA-E6F4B9:7:37:13061:6271#0/1 26 0 0
AAGAGGACTGGAGATACATCGCCACA

QA 1 26 1 26
DS VERSION: 1 TIME: Tue Jun 14 09:07:44 2011

RD ILLUMINA-E6F4B9:7:41:17051:9512#0/1 21 0 0
AAGAGGACTGGAGATACATCG

QA 1 21 1 21
DS VERSION: 1 TIME: Tue Jun 14 09:07:44 2011

RD ILLUMINA-E6F4B9:7:42:6699:10866#0/1 26 0 0
AAGAGGACTGGAGATACATCGCCACA

QA 1 26 1 26
DS VERSION: 1 TIME: Tue Jun 14 09:07:44 2011

RD ILLUMINA-E6F4B9:7:44:6401:18243#0/1 24 0 0
AAGAGGACTGGAGATACATCGCCT

QA 1 24 1 23
DS VERSION: 1 TIME: Tue Jun 14 09:07:44 2011

RD ILLUMINA-E6F4B9:7:46:4619:10112#0/1 22 0 0
AAGAGGACTGGAGATACATCGC

QA 1 22 1 22
DS VERSION: 1 TIME: Tue Jun 14 09:07:44 2011

RD ILLUMINA-E6F4B9:7:46:9339:16068#0/1 18 0 0
AAGAGGACTGGAGATACA

QA 1 18 1 18
DS VERSION: 1 TIME: Tue Jun 14 09:07:44 2011

RD ILLUMINA-E6F4B9:7:47:4584:2647#0/1 18 0 0
AAGAGGACTGGAGATACA

QA 1 18 1 18
DS VERSION: 1 TIME: Tue Jun 14 09:07:44 2011

RD ILLUMINA-E6F4B9:7:49:14956:19820#0/1 26 0 0
AAGAGGACTGGAGATACATCGCCACA

QA 1 26 1 26
DS VERSION: 1 TIME: Tue Jun 14 09:07:44 2011

RD ILLUMINA-E6F4B9:7:52:3510:15223#0/1 21 0 0
AAGAGGACTGGAGATACATCG

QA 1 21 1 21
DS VERSION: 1 TIME: Tue Jun 14 09:07:44 2011

RD ILLUMINA-E6F4B9:7:54:6320:18518#0/1 29 0 0
AAGAGGACTGGAGATACATCGCCACAACC

QA 1 29 1 29
DS VERSION: 1 TIME: Tue Jun 14 09:07:44 2011

RD ILLUMINA-E6F4B9:7:55:8527:16643#0/1 23 0 0
AAGAGGACTGGAGATACATCGCC

QA 1 23 1 23
DS VERSION: 1 TIME: Tue Jun 14 09:07:44 2011

RD ILLUMINA-E6F4B9:7:57:14252:3886#0/1 26 0 0
AAGAGGACTGGAGATACATCGCCACA

QA 1 26 1 26
DS VERSION: 1 TIME: Tue Jun 14 09:07:44 2011

RD ILLUMINA-E6F4B9:7:57:12438:14366#0/1 21 0 0
AAGAGGACTGGAGATACATCG

QA 1 21 1 21
DS VERSION: 1 TIME: Tue Jun 14 09:07:44 2011

RD ILLUMINA-E6F4B9:7:59:10080:2159#0/1 23 0 0
AAGAGGACTGGAGATACATCGCC

QA 1 23 1 23
DS VERSION: 1 TIME: Tue Jun 14 09:07:44 2011

RD ILLUMINA-E6F4B9:7:65:2809:16763#0/1 18 0 0
AAGAGGACTGGAGATACA

QA 1 18 1 18
DS VERSION: 1 TIME: Tue Jun 14 09:07:44 2011

RD ILLUMINA-E6F4B9:7:66:1172:3440#0/1 18 0 0
AAGAGGACTGGAGATACA

QA 1 18 1 18
DS VERSION: 1 TIME: Tue Jun 14 09:07:44 2011

RD ILLUMINA-E6F4B9:7:68:17846:18991#0/1 24 0 0
AAGAGGACTGGAGATACATCGCCA

QA 1 24 1 24
DS VERSION: 1 TIME: Tue Jun 14 09:07:44 2011

RD ILLUMINA-E6F4B9:7:68:7344:19599#0/1 20 0 0
AAGAGGACTGGAGATACATC

QA 1 20 1 20
DS VERSION: 1 TIME: Tue Jun 14 09:07:44 2011

RD ILLUMINA-E6F4B9:7:68:13171:19612#0/1 21 0 0
AAGAGGACTGGAGATACATCA

QA 1 21 1 20
DS VERSION: 1 TIME: Tue Jun 14 09:07:44 2011

RD ILLUMINA-E6F4B9:7:69:3431:21260#0/1 20 0 0
AAGAGGACTGGAGATACATC

QA 1 20 1 20
DS VERSION: 1 TIME: Tue Jun 14 09:07:44 2011

RD ILLUMINA-E6F4B9:7:71:11159:14822#0/1 23 0 0
AAGAGGACTGGAGATACATCGCC

QA 1 23 1 23
DS VERSION: 1 TIME: Tue Jun 14 09:07:44 2011

RD ILLUMINA-E6F4B9:7:74:12598:6544#0/1 25 0 0
AAGAGGACTGGAGATACATCGCCAC

QA 1 25 1 25
DS VERSION: 1 TIME: Tue Jun 14 09:07:44 2011

RD ILLUMINA-E6F4B9:7:75:18509:8126#0/1 24 0 0
AAGAGGACTGGAGATACATCGCCA

QA 1 24 1 24
DS VERSION: 1 TIME: Tue Jun 14 09:07:44 2011

RD ILLUMINA-E6F4B9:7:76:7274:9216#0/1 26 0 0
AAGAGGACTGGAGATACATCGCCACA

QA 1 26 1 26
DS VERSION: 1 TIME: Tue Jun 14 09:07:44 2011

RD ILLUMINA-E6F4B9:7:78:18469:12592#0/1 26 0 0
AAGAGGACTGGAGATACATCGCCACA

QA 1 26 1 26
DS VERSION: 1 TIME: Tue Jun 14 09:07:44 2011

RD ILLUMINA-E6F4B9:7:81:9064:2939#0/1 21 0 0
AAGAGGACTGGAGATACATCG

QA 1 21 1 21
DS VERSION: 1 TIME: Tue Jun 14 09:07:44 2011

RD ILLUMINA-E6F4B9:7:81:2605:5758#0/1 23 0 0
AAGAGGACTGGAGATACATCGCC

QA 1 23 1 23
DS VERSION: 1 TIME: Tue Jun 14 09:07:44 2011

RD ILLUMINA-E6F4B9:7:83:7635:7449#0/1 24 0 0
AAGAGGACTGGAGATACATCGCCT

QA 1 24 1 23
DS VERSION: 1 TIME: Tue Jun 14 09:07:44 2011

RD ILLUMINA-E6F4B9:7:84:14339:1504#0/1 20 0 0
AAGAGGACTGGAGATACATC

QA 1 20 1 20
DS VERSION: 1 TIME: Tue Jun 14 09:07:44 2011

RD ILLUMINA-E6F4B9:7:84:4939:8636#0/1 26 0 0
AAGAGGACTGGAGATACATCGCCACA

QA 1 26 1 26
DS VERSION: 1 TIME: Tue Jun 14 09:07:44 2011

RD ILLUMINA-E6F4B9:7:84:8070:10061#0/1 20 0 0
AAGAGGACTGGAGATACATC

QA 1 20 1 20
DS VERSION: 1 TIME: Tue Jun 14 09:07:44 2011

RD ILLUMINA-E6F4B9:7:87:2709:4869#0/1 26 0 0
AAGAGGACTGGAGATACATCGCCACA

QA 1 26 1 26
DS VERSION: 1 TIME: Tue Jun 14 09:07:44 2011

RD ILLUMINA-E6F4B9:7:91:14553:17134#0/1 21 0 0
AAGAGGACTGGAGATACATCG

QA 1 21 1 21
DS VERSION: 1 TIME: Tue Jun 14 09:07:44 2011

RD ILLUMINA-E6F4B9:7:92:11543:12064#0/1 26 0 0
AAGAGGACTGGAGATACATCGCCACA

QA 1 26 1 26
DS VERSION: 1 TIME: Tue Jun 14 09:07:44 2011

RD ILLUMINA-E6F4B9:7:92:13815:12245#0/1 18 0 0
AAGAGGACTGGAGATACA

QA 1 18 1 18
DS VERSION: 1 TIME: Tue Jun 14 09:07:44 2011

RD ILLUMINA-E6F4B9:7:94:17705:12449#0/1 23 0 0
AAGAGGACTGGAGATACATCGCC

QA 1 23 1 23
DS VERSION: 1 TIME: Tue Jun 14 09:07:44 2011

RD ILLUMINA-E6F4B9:7:96:14039:18844#0/1 25 0 0
AAGAGGACTGGAGATACATCGCCAC

QA 1 25 1 25
DS VERSION: 1 TIME: Tue Jun 14 09:07:44 2011

RD ILLUMINA-E6F4B9:7:98:9618:8067#0/1 24 0 0
AAGAGGACTGGAGATACATCGCCA

QA 1 24 1 24
DS VERSION: 1 TIME: Tue Jun 14 09:07:44 2011

RD ILLUMINA-E6F4B9:7:100:4899:1643#0/1 18 0 0
AAGAGGACTGGAGATACA

QA 1 18 1 18
DS VERSION: 1 TIME: Tue Jun 14 09:07:44 2011

RD ILLUMINA-E6F4B9:7:101:16192:6054#0/1 23 0 0
AAGAGGACTGGAGATACATCGCC

QA 1 23 1 23
DS VERSION: 1 TIME: Tue Jun 14 09:07:44 2011

RD ILLUMINA-E6F4B9:7:101:6459:8680#0/1 24 0 0
AAGAGGACTGGAGATACATCGAAA

QA 1 24 1 21
DS VERSION: 1 TIME: Tue Jun 14 09:07:44 2011

RD ILLUMINA-E6F4B9:7:104:4637:17586#0/1 20 0 0
AAGAGGACTGGAGATACATC

QA 1 20 1 20
DS VERSION: 1 TIME: Tue Jun 14 09:07:44 2011

RD ILLUMINA-E6F4B9:7:110:5482:5500#0/1 20 0 0
AAGAGGACTGGAGATACATC

QA 1 20 1 20
DS VERSION: 1 TIME: Tue Jun 14 09:07:44 2011

RD ILLUMINA-E6F4B9:7:112:11643:19859#0/1 23 0 0
AAGAGGACTGGAGATACATCGCC

QA 1 23 1 23
DS VERSION: 1 TIME: Tue Jun 14 09:07:44 2011

RD ILLUMINA-E6F4B9:7:114:15188:7529#0/1 26 0 0
AAGAGGACTGGAGATACATCGCCACA

QA 1 26 1 26
DS VERSION: 1 TIME: Tue Jun 14 09:07:44 2011

RD ILLUMINA-E6F4B9:7:116:17374:6322#0/1 25 0 0
AAGAGGACTGGAGATACATCGCCAC

QA 1 25 1 25
DS VERSION: 1 TIME: Tue Jun 14 09:07:44 2011

RD ILLUMINA-E6F4B9:7:116:14478:6580#0/1 22 0 0
AAGAGGACTGGAGATACATCGC

QA 1 22 1 22
DS VERSION: 1 TIME: Tue Jun 14 09:07:44 2011

RD ILLUMINA-E6F4B9:7:118:13744:20053#0/1 27 0 0
AAGAGGACTGGAGATACATCGCCACAA

QA 1 27 1 27
DS VERSION: 1 TIME: Tue Jun 14 09:07:44 2011

RD ILLUMINA-E6F4B9:7:120:5473:17069#0/1 18 0 0
AAGAGGACTGGAGATACA

QA 1 18 1 18
DS VERSION: 1 TIME: Tue Jun 14 09:07:44 2011

RD ILLUMINA-E6F4B9:7:90:3211:17414#0/1 21 0 0
AGAGAGGACTGGAGATACATC

QA 1 21 3 21
DS VERSION: 1 TIME: Tue Jun 14 09:07:44 2011

RD ILLUMINA-E6F4B9:7:8:14728:15676#0/1 24 0 0
AGAGGACTGGAGATACATCGCCAC

QA 1 24 1 24
DS VERSION: 1 TIME: Tue Jun 14 09:07:44 2011

RD ILLUMINA-E6F4B9:7:9:19154:15370#0/1 20 0 0
AGAGGACTGGAGATACATCG

QA 1 20 1 20
DS VERSION: 1 TIME: Tue Jun 14 09:07:44 2011

RD ILLUMINA-E6F4B9:7:13:3932:3126#0/1 27 0 0
AGAGGACTGGAGATACATCGCCACAAC

QA 1 27 1 27
DS VERSION: 1 TIME: Tue Jun 14 09:07:44 2011

RD ILLUMINA-E6F4B9:7:20:3527:15302#0/1 23 0 0
AGAGGACTGGAGATACATCGCCA

QA 1 23 1 23
DS VERSION: 1 TIME: Tue Jun 14 09:07:44 2011

RD ILLUMINA-E6F4B9:7:23:11591:10818#0/1 23 0 0
AGAGGACTGGAGATACATCGCCA

QA 1 23 1 23
DS VERSION: 1 TIME: Tue Jun 14 09:07:44 2011

RD ILLUMINA-E6F4B9:7:24:7180:10515#0/1 19 0 0
AGAGGACTGGAGATACATC

QA 1 19 1 19
DS VERSION: 1 TIME: Tue Jun 14 09:07:44 2011

RD ILLUMINA-E6F4B9:7:36:11886:11833#0/1 23 0 0
AGAGGACTGGAGATACATCGCCA

QA 1 23 1 23
DS VERSION: 1 TIME: Tue Jun 14 09:07:44 2011

RD ILLUMINA-E6F4B9:7:38:19333:11604#0/1 25 0 0
AGAGGACTGGAGATACATCGCCACA

QA 1 25 1 25
DS VERSION: 1 TIME: Tue Jun 14 09:07:44 2011

RD ILLUMINA-E6F4B9:7:45:4434:1784#0/1 22 0 0
AGAGGACTGGAGATACATCGCC

QA 1 22 1 22
DS VERSION: 1 TIME: Tue Jun 14 09:07:44 2011

RD ILLUMINA-E6F4B9:7:48:11565:19036#0/1 23 0 0
AGAGGACTGGAGATACATCGCCA

QA 1 23 1 23
DS VERSION: 1 TIME: Tue Jun 14 09:07:44 2011

RD ILLUMINA-E6F4B9:7:53:17712:17953#0/1 21 0 0
AGAGGACTGGAGATACATCGC

QA 1 21 1 21
DS VERSION: 1 TIME: Tue Jun 14 09:07:44 2011

RD ILLUMINA-E6F4B9:7:56:8806:14389#0/1 18 0 0
AGAGGACTGGAGATACAT

QA 1 18 1 18
DS VERSION: 1 TIME: Tue Jun 14 09:07:44 2011

RD ILLUMINA-E6F4B9:7:73:14160:13301#0/1 22 0 0
AGAGGACTGGAGATACATCGCC

QA 1 22 1 22
DS VERSION: 1 TIME: Tue Jun 14 09:07:44 2011

RD ILLUMINA-E6F4B9:7:74:3657:20778#0/1 28 0 0
AGAGGACTGGAGATACATCGCCACAACC

QA 1 28 1 28
DS VERSION: 1 TIME: Tue Jun 14 09:07:44 2011

RD ILLUMINA-E6F4B9:7:80:2120:9641#0/1 21 0 0
AGAGGACTGGAGATACATCGC

QA 1 21 1 21
DS VERSION: 1 TIME: Tue Jun 14 09:07:44 2011

RD ILLUMINA-E6F4B9:7:81:4480:7361#0/1 21 0 0
AGAGGACTGGAGATACATCGC

QA 1 21 1 21
DS VERSION: 1 TIME: Tue Jun 14 09:07:44 2011

RD ILLUMINA-E6F4B9:7:85:9978:13373#0/1 21 0 0
AGAGGACTGGAGATACATCGC

QA 1 21 1 21
DS VERSION: 1 TIME: Tue Jun 14 09:07:44 2011

RD ILLUMINA-E6F4B9:7:93:13023:18007#0/1 21 0 0
AGAGGACTGGAGATACATCGC

QA 1 21 1 21
DS VERSION: 1 TIME: Tue Jun 14 09:07:44 2011

RD ILLUMINA-E6F4B9:7:104:16173:8002#0/1 18 0 0
AGAGGACTGGAGATACAT

QA 1 18 1 18
DS VERSION: 1 TIME: Tue Jun 14 09:07:44 2011

RD ILLUMINA-E6F4B9:7:105:6732:16147#0/1 26 0 0
AGAGGACTGGAGATACATCGCCACAA

QA 1 26 1 26
DS VERSION: 1 TIME: Tue Jun 14 09:07:44 2011

RD ILLUMINA-E6F4B9:7:106:4065:12272#0/1 22 0 0
AGAGGACTGGAGATACATCGCC

QA 1 22 1 22
DS VERSION: 1 TIME: Tue Jun 14 09:07:44 2011

RD ILLUMINA-E6F4B9:7:109:15253:13730#0/1 22 0 0
AGAGGACTGGAGATACATCGCC

QA 1 22 1 22
DS VERSION: 1 TIME: Tue Jun 14 09:07:44 2011

RD ILLUMINA-E6F4B9:7:112:18952:10666#0/1 28 0 0
AGAGGACTGGAGATACATCGCCACATCG

QA 1 28 1 25
DS VERSION: 1 TIME: Tue Jun 14 09:07:44 2011

RD ILLUMINA-E6F4B9:7:113:4052:15777#0/1 19 0 0
AGAGGACTGGAGATACATC

QA 1 19 1 19
DS VERSION: 1 TIME: Tue Jun 14 09:07:44 2011

RD ILLUMINA-E6F4B9:7:114:3035:10466#0/1 22 0 0
AGAGGACTGGAGATACATCGCC

QA 1 22 1 22
DS VERSION: 1 TIME: Tue Jun 14 09:07:44 2011

RD ILLUMINA-E6F4B9:7:118:9177:3209#0/1 24 0 0
AGAGGACTGGAGATACATCGCCAC

QA 1 24 1 24
DS VERSION: 1 TIME: Tue Jun 14 09:07:44 2011

RD ILLUMINA-E6F4B9:7:70:13175:8394#0/1 25 0 0
TAGGGAGGACTGGAGATACATCGCC

QA 1 25 5 25
DS VERSION: 1 TIME: Tue Jun 14 09:07:44 2011

RD ILLUMINA-E6F4B9:7:86:11197:11596#0/1 25 0 0
TTTTGAGGACTGGAGATACATCGCC

QA 1 25 5 25
DS VERSION: 1 TIME: Tue Jun 14 09:07:44 2011

RD ILLUMINA-E6F4B9:7:52:3350:13973#0/1 24 0 0
GGGAGGACTGGAGATACATCGCCA

QA 1 24 3 24
DS VERSION: 1 TIME: Tue Jun 14 09:07:44 2011

RD ILLUMINA-E6F4B9:7:13:18619:3147#0/1 26 0 0
GAGGACTGGAGATACATCGCCACAAC

QA 1 26 1 26
DS VERSION: 1 TIME: Tue Jun 14 09:07:44 2011

RD ILLUMINA-E6F4B9:7:26:8374:2207#0/1 23 0 0
GAGGACTGGAGATACATCGCCAC

QA 1 23 1 23
DS VERSION: 1 TIME: Tue Jun 14 09:07:44 2011

RD ILLUMINA-E6F4B9:7:42:8512:14965#0/1 22 0 0
GAGGACTGGAGATACATCGCCA

QA 1 22 1 22
DS VERSION: 1 TIME: Tue Jun 14 09:07:44 2011

RD ILLUMINA-E6F4B9:7:43:4097:3724#0/1 24 0 0
GAGGACTGGAGATACATCGCCACA

QA 1 24 1 24
DS VERSION: 1 TIME: Tue Jun 14 09:07:44 2011

RD ILLUMINA-E6F4B9:7:60:11542:5044#0/1 21 0 0
GAGGACTGGAGATACATCGCC

QA 1 21 1 21
DS VERSION: 1 TIME: Tue Jun 14 09:07:44 2011

RD ILLUMINA-E6F4B9:7:62:3401:11002#0/1 21 0 0
GAGGACTGGAGATACATCGCC

QA 1 21 1 21
DS VERSION: 1 TIME: Tue Jun 14 09:07:44 2011

RD ILLUMINA-E6F4B9:7:72:16380:18016#0/1 21 0 0
GAGGACTGGAGATACATCGCC

QA 1 21 1 21
DS VERSION: 1 TIME: Tue Jun 14 09:07:44 2011

RD ILLUMINA-E6F4B9:7:75:5186:9620#0/1 21 0 0
GAGGACTGGAGATACATCGCC

QA 1 21 1 21
DS VERSION: 1 TIME: Tue Jun 14 09:07:44 2011

RD ILLUMINA-E6F4B9:7:106:1362:6118#0/1 23 0 0
GAGGACTGGAGATACATCGCCAC

QA 1 23 1 23
DS VERSION: 1 TIME: Tue Jun 14 09:07:44 2011

RD ILLUMINA-E6F4B9:7:119:8397:4221#0/1 21 0 0
GAGGACTGGAGATACATCGCC

QA 1 21 1 21
DS VERSION: 1 TIME: Tue Jun 14 09:07:44 2011

RD ILLUMINA-E6F4B9:7:78:2495:12264#0/1 20 0 0
AGGACTGGAGATACATCGCC

QA 1 20 1 20
DS VERSION: 1 TIME: Tue Jun 14 09:07:44 2011

RD ILLUMINA-E6F4B9:7:34:1973:8879#0/1 20 0 0
AACCAGGGCCAAGCAAGCGC

QA 1 20 1 20
DS VERSION: 1 TIME: Tue Jun 14 09:07:44 2011

RD ILLUMINA-E6F4B9:7:48:13327:20300#0/1 21 0 0
CCAGGGCCAAGCAAGCGCCGA

QA 1 21 1 21
DS VERSION: 1 TIME: Tue Jun 14 09:07:44 2011

RD ILLUMINA-E6F4B9:7:27:12051:21018#0/1 24 0 0
AAGCAAGCGCCGAGTTTCATCACA

QA 1 24 1 24
DS VERSION: 1 TIME: Tue Jun 14 09:07:44 2011

RD ILLUMINA-E6F4B9:7:105:4417:10419#0/1 21 0 0
GCAAGCGCCGAGTTTCATCAC

QA 1 21 1 21
DS VERSION: 1 TIME: Tue Jun 14 09:07:44 2011

RD ILLUMINA-E6F4B9:7:98:8740:17733#0/1 21 0 0
CAAGCGCCGAGTTTCATCACT

QA 1 21 1 20
DS VERSION: 1 TIME: Tue Jun 14 09:07:44 2011

RD ILLUMINA-E6F4B9:7:115:8369:17522#0/1 22 0 0
ACGCCGAGTTTCATCACATTCG

QA 1 22 2 22
DS VERSION: 1 TIME: Tue Jun 14 09:07:44 2011

RD ILLUMINA-E6F4B9:7:20:3461:20104#0/1 21 0 0
CGCCGAGTTTCATCACATTCG

QA 1 21 1 21
DS VERSION: 1 TIME: Tue Jun 14 09:07:44 2011

RD ILLUMINA-E6F4B9:7:45:8144:21007#0/1 21 0 0
CCGAGTTTCATCACATTCGAT

QA 1 21 1 21
DS VERSION: 1 TIME: Tue Jun 14 09:07:44 2011

RD ILLUMINA-E6F4B9:7:27:3588:9394#0/1 28 0 0
GAGTTTCATCACATTCGATCACGGAGAC

QA 1 28 1 28
DS VERSION: 1 TIME: Tue Jun 14 09:07:44 2011

RD ILLUMINA-E6F4B9:7:16:12138:6927#0/1 23 0 0
AGTTTCATCACATTCGATCACGG

QA 1 23 1 23
DS VERSION: 1 TIME: Tue Jun 14 09:07:44 2011

RD ILLUMINA-E6F4B9:7:24:7693:21165#0/1 21 0 0
TTCATCACATTCGATCACGGA

QA 1 21 1 21
DS VERSION: 1 TIME: Tue Jun 14 09:07:44 2011

RD ILLUMINA-E6F4B9:7:77:13370:1941#0/1 21 0 0
TTCATCACATTCGATCACGGA

QA 1 21 1 21
DS VERSION: 1 TIME: Tue Jun 14 09:07:44 2011

RD ILLUMINA-E6F4B9:7:6:7986:1934#0/1 22 0 0
TCATCACATTCGATCACGGAGA

QA 1 22 1 22
DS VERSION: 1 TIME: Tue Jun 14 09:07:44 2011

RD ILLUMINA-E6F4B9:7:120:15250:4888#0/1 21 0 0
TCATCACATTCGATCACGGAG

QA 1 21 1 21
DS VERSION: 1 TIME: Tue Jun 14 09:07:44 2011

RD ILLUMINA-E6F4B9:7:72:16886:2678#0/1 22 0 0
ACATCACATTCGATCACGGAGA

QA 1 22 2 22
DS VERSION: 1 TIME: Tue Jun 14 09:07:44 2011

RD ILLUMINA-E6F4B9:7:25:15300:19606#0/1 22 0 0
CATCACATTCGATCACGGAGAA

QA 1 22 1 21
DS VERSION: 1 TIME: Tue Jun 14 09:07:44 2011

RD ILLUMINA-E6F4B9:7:38:8040:1635#0/1 21 0 0
ATCACATTCGATCACGGAGAC

QA 1 21 1 21
DS VERSION: 1 TIME: Tue Jun 14 09:07:44 2011

RD ILLUMINA-E6F4B9:7:69:11782:16385#0/1 21 0 0
ATCACATTCGATCACGGAGAC

QA 1 21 1 21
DS VERSION: 1 TIME: Tue Jun 14 09:07:44 2011

RD ILLUMINA-E6F4B9:7:95:10628:13120#0/1 20 0 0
ATCACATTCGATCACGGAGA

QA 1 20 1 20
DS VERSION: 1 TIME: Tue Jun 14 09:07:44 2011

RD ILLUMINA-E6F4B9:7:25:15062:3935#0/1 18 0 0
TCACATTCGATCACGGAG

QA 1 18 1 18
DS VERSION: 1 TIME: Tue Jun 14 09:07:44 2011

RD ILLUMINA-E6F4B9:7:101:13702:6138#0/1 18 0 0
CACATTCGATCACGGAGG

QA 1 18 1 17
DS VERSION: 1 TIME: Tue Jun 14 09:07:44 2011

RD ILLUMINA-E6F4B9:7:73:11401:3238#0/1 22 0 0
ACATTCGATCACGGAGACCACA

QA 1 22 1 22
DS VERSION: 1 TIME: Tue Jun 14 09:07:44 2011

RD ILLUMINA-E6F4B9:7:82:16338:7630#0/1 22 0 0
ACATTCGATCACGGAGACCACA

QA 1 22 1 22
DS VERSION: 1 TIME: Tue Jun 14 09:07:44 2011

RD ILLUMINA-E6F4B9:7:78:9865:4247#0/1 24 0 0
CATTCGATCACGGAGACCACATCC

QA 1 24 1 24
DS VERSION: 1 TIME: Tue Jun 14 09:07:44 2011

RD ILLUMINA-E6F4B9:7:93:19737:3120#0/1 24 0 0
ATTCGATCACGGAGACCACATCCA

QA 1 24 1 24
DS VERSION: 1 TIME: Tue Jun 14 09:07:44 2011

RD ILLUMINA-E6F4B9:7:93:13494:10131#0/1 29 0 0
ATTCGATCACGGAGACCACATCCATATCC

QA 1 29 1 29
DS VERSION: 1 TIME: Tue Jun 14 09:07:44 2011

RD ILLUMINA-E6F4B9:7:98:3921:11504#0/1 18 0 0
TCGATCACGGAGACCACA

QA 1 18 1 18
DS VERSION: 1 TIME: Tue Jun 14 09:07:44 2011

RD ILLUMINA-E6F4B9:7:107:3322:15265#0/1 21 0 0
CACGGAGACCACATCCATATC

QA 1 21 1 21
DS VERSION: 1 TIME: Tue Jun 14 09:07:44 2011

RD ILLUMINA-E6F4B9:7:66:1682:4373#0/1 20 0 0
CGGAGACCACATCCATATCC

QA 1 20 1 20
DS VERSION: 1 TIME: Tue Jun 14 09:07:44 2011

RD ILLUMINA-E6F4B9:7:113:7045:16856#0/1 21 0 0
GGAGACCACATCCATATCCTC

QA 1 21 1 21
DS VERSION: 1 TIME: Tue Jun 14 09:07:44 2011

RD ILLUMINA-E6F4B9:7:7:15662:15912#0/1 21 0 0
GAGACCACATCCATATCCTCT

QA 1 21 1 21
DS VERSION: 1 TIME: Tue Jun 14 09:07:44 2011

RD ILLUMINA-E6F4B9:7:3:11739:7756#0/1 26 0 0
TCCATATCCTCTTCTCCTCGTCCAAT

QA 1 26 1 26
DS VERSION: 1 TIME: Tue Jun 14 09:07:44 2011

RD ILLUMINA-E6F4B9:7:111:5021:14436#0/1 25 0 0
TCCATATCCTCTTCTCCTCGTCCAA

QA 1 25 1 25
DS VERSION: 1 TIME: Tue Jun 14 09:07:44 2011

RD ILLUMINA-E6F4B9:7:72:6651:10395#0/1 23 0 0
CCATATCCTCTTCTCCTCGTCCA

QA 1 23 1 23
DS VERSION: 1 TIME: Tue Jun 14 09:07:44 2011

RD ILLUMINA-E6F4B9:7:80:2878:6315#0/1 23 0 0
CCATATCCTCTTCTCCTCGTCCA

QA 1 23 1 23
DS VERSION: 1 TIME: Tue Jun 14 09:07:44 2011

RD ILLUMINA-E6F4B9:7:9:4579:9072#0/1 21 0 0
CATATCCTCTTCTCCTCGTCC

QA 1 21 1 21
DS VERSION: 1 TIME: Tue Jun 14 09:07:44 2011

RD ILLUMINA-E6F4B9:7:63:7786:14304#0/1 25 0 0
ATCCTCTTCTCCTCGTCCAATACAG

QA 1 25 1 25
DS VERSION: 1 TIME: Tue Jun 14 09:07:44 2011

RD ILLUMINA-E6F4B9:7:33:5085:10967#0/1 21 0 0
CTCTTCTCCTCGTCCAATACA

QA 1 21 1 21
DS VERSION: 1 TIME: Tue Jun 14 09:07:44 2011

RD ILLUMINA-E6F4B9:7:37:5416:19008#0/1 21 0 0
CTCTTCTCCTCGTCCAATACA

QA 1 21 1 21
DS VERSION: 1 TIME: Tue Jun 14 09:07:44 2011

RD ILLUMINA-E6F4B9:7:51:10567:12774#0/1 21 0 0
CTCTTCTCCTCGTCCAATACA

QA 1 21 1 21
DS VERSION: 1 TIME: Tue Jun 14 09:07:44 2011

RD ILLUMINA-E6F4B9:7:100:16314:4485#0/1 21 0 0
CTCTTCTCCTCGTCCAATACA

QA 1 21 1 21
DS VERSION: 1 TIME: Tue Jun 14 09:07:44 2011

RD ILLUMINA-E6F4B9:7:102:10661:16856#0/1 21 0 0
CTCTTCTCCTCGTCCAATACA

QA 1 21 1 21
DS VERSION: 1 TIME: Tue Jun 14 09:07:44 2011

RD ILLUMINA-E6F4B9:7:69:12750:9820#0/1 21 0 0
TTCTCCTCGTCCAATACAGGA

QA 1 21 1 21
DS VERSION: 1 TIME: Tue Jun 14 09:07:44 2011

RD ILLUMINA-E6F4B9:7:4:19038:14709#0/1 21 0 0
GGAGGAAACAGCACAAGAGTC

QA 1 21 1 21
DS VERSION: 1 TIME: Tue Jun 14 09:07:44 2011

RD ILLUMINA-E6F4B9:7:22:2485:18676#0/1 25 0 0
GAGGAAACAGCACAAGAGTCAGAAC

QA 1 25 1 25
DS VERSION: 1 TIME: Tue Jun 14 09:07:44 2011

RD ILLUMINA-E6F4B9:7:40:16036:15914#0/1 24 0 0
AACAGCACAAGAGTCAGAACCAGA

QA 1 24 1 24
DS VERSION: 1 TIME: Tue Jun 14 09:07:44 2011

RD ILLUMINA-E6F4B9:7:39:8171:1430#0/1 22 0 0
CAGCACAAGAGTCAGAACCAGT

QA 1 22 1 21
DS VERSION: 1 TIME: Tue Jun 14 09:07:44 2011

RD ILLUMINA-E6F4B9:7:64:18797:11782#0/1 21 0 0
AGCACAAGAGTCAGAACCAGA

QA 1 21 1 21
DS VERSION: 1 TIME: Tue Jun 14 09:07:44 2011

RD ILLUMINA-E6F4B9:7:30:9960:15788#0/1 29 0 0
CACAAGAGTCAGAACCAGAATCACCAAGT

QA 1 29 1 29
DS VERSION: 1 TIME: Tue Jun 14 09:07:44 2011

RD ILLUMINA-E6F4B9:7:68:15493:10333#0/1 26 0 0
CAAGAGTCAGAACCAGAATCACCAAG

QA 1 26 1 26
DS VERSION: 1 TIME: Tue Jun 14 09:07:44 2011

RD ILLUMINA-E6F4B9:7:80:7023:6549#0/1 22 0 0
ACCAGAATCACCAAGTTTCTTA

QA 1 22 1 22
DS VERSION: 1 TIME: Tue Jun 14 09:07:44 2011

RD ILLUMINA-E6F4B9:7:27:10184:8301#0/1 20 0 0
CACCAAGTTTCTTAGTGCGA

QA 1 20 1 20
DS VERSION: 1 TIME: Tue Jun 14 09:07:44 2011

RD ILLUMINA-E6F4B9:7:21:10123:19823#0/1 21 0 0
AGTTTCTTAGTGCGACAAGCG

QA 1 21 1 21
DS VERSION: 1 TIME: Tue Jun 14 09:07:44 2011

RD ILLUMINA-E6F4B9:7:20:13250:11978#0/1 21 0 0
CGACAAGCGCAGGAAGTGCAG

QA 1 21 1 21
DS VERSION: 1 TIME: Tue Jun 14 09:07:44 2011

RD ILLUMINA-E6F4B9:7:113:12040:3213#0/1 20 0 0
AGCGCAGGAAGTGCAGAAGC

QA 1 20 1 20
DS VERSION: 1 TIME: Tue Jun 14 09:07:44 2011

RD ILLUMINA-E6F4B9:7:69:13717:20382#0/1 22 0 0
CGCAGGAAGTGCAGAAGCGACT

QA 1 22 1 22
DS VERSION: 1 TIME: Tue Jun 14 09:07:44 2011

RD ILLUMINA-E6F4B9:7:92:4788:12988#0/1 23 0 0
CGCAGGAAGTGCAGAAGCGACTA

QA 1 23 1 23
DS VERSION: 1 TIME: Tue Jun 14 09:07:44 2011

RD ILLUMINA-E6F4B9:7:53:9683:8718#0/1 21 0 0
GCAGGAAGTGCAGAAGCGACT

QA 1 21 1 21
DS VERSION: 1 TIME: Tue Jun 14 09:07:44 2011

RD ILLUMINA-E6F4B9:7:25:9739:18816#0/1 22 0 0
GGAAGTGCAGAAGCGACTATCA

QA 1 22 1 22
DS VERSION: 1 TIME: Tue Jun 14 09:07:44 2011

RD ILLUMINA-E6F4B9:7:93:12210:19286#0/1 28 0 0
TTTCTCAGGAACTTCATTCTCTATTGCA

QA 1 28 1 28
DS VERSION: 1 TIME: Tue Jun 14 09:07:44 2011

RD ILLUMINA-E6F4B9:7:55:8476:1860#0/1 25 0 0
CAGGAACTTCATTCTCTATTGCATC

QA 1 25 1 25
DS VERSION: 1 TIME: Tue Jun 14 09:07:44 2011

RD ILLUMINA-E6F4B9:7:86:7679:11652#0/1 24 0 0
AACTTCATTCTCTATTGCATCCGC

QA 1 24 1 23
DS VERSION: 1 TIME: Tue Jun 14 09:07:44 2011

RD ILLUMINA-E6F4B9:7:15:12307:7175#0/1 26 0 0
CTTCATTCTCTATTGCATCCGTTACG

QA 1 26 1 26
DS VERSION: 1 TIME: Tue Jun 14 09:07:44 2011

RD ILLUMINA-E6F4B9:7:11:6517:17349#0/1 21 0 0
ATTCTCTATTGCATCCGTTAC

QA 1 21 1 21
DS VERSION: 1 TIME: Tue Jun 14 09:07:44 2011

RD ILLUMINA-E6F4B9:7:56:14928:4502#0/1 21 0 0
ATTCTCTATTGCATCCGTTAC

QA 1 21 1 21
DS VERSION: 1 TIME: Tue Jun 14 09:07:44 2011

RD ILLUMINA-E6F4B9:7:115:2042:9452#0/1 19 0 0
ATTCTCTATTGCATCCGTT

QA 1 19 1 19
DS VERSION: 1 TIME: Tue Jun 14 09:07:44 2011

RD ILLUMINA-E6F4B9:7:105:6515:11832#0/1 18 0 0
CTCTATTGCATCCGTTAC

QA 1 18 1 18
DS VERSION: 1 TIME: Tue Jun 14 09:07:44 2011

RD ILLUMINA-E6F4B9:7:105:7983:8744#0/1 23 0 0
CTATTGCATCCGTTACGGTATCG

QA 1 23 1 23
DS VERSION: 1 TIME: Tue Jun 14 09:07:44 2011

RD ILLUMINA-E6F4B9:7:23:15620:9276#0/1 21 0 0
GTATCGAAACAGTCAATATCT

QA 1 21 1 21
DS VERSION: 1 TIME: Tue Jun 14 09:07:44 2011

RD ILLUMINA-E6F4B9:7:117:18917:11220#0/1 21 0 0
TCGAAACAGTCAATATCTATG

QA 1 21 1 21
DS VERSION: 1 TIME: Tue Jun 14 09:07:44 2011

RD ILLUMINA-E6F4B9:7:39:9708:6627#0/1 21 0 0
AAACAGTCAATATCTATGGAA

QA 1 21 1 21
DS VERSION: 1 TIME: Tue Jun 14 09:07:44 2011

RD ILLUMINA-E6F4B9:7:41:4586:12345#0/1 22 0 0
AAACAGTCAATATCTATGGAAA

QA 1 22 1 22
DS VERSION: 1 TIME: Tue Jun 14 09:07:44 2011

RD ILLUMINA-E6F4B9:7:110:5705:16169#0/1 21 0 0
ACAGTCAATATCTATGGAAAT

QA 1 21 1 21
DS VERSION: 1 TIME: Tue Jun 14 09:07:44 2011

RD ILLUMINA-E6F4B9:7:60:14566:20219#0/1 21 0 0
CAGTCAATATCTATGGAAATA

QA 1 21 1 21
DS VERSION: 1 TIME: Tue Jun 14 09:07:44 2011

RD ILLUMINA-E6F4B9:7:63:3814:10219#0/1 24 0 0
AAAATCCAACAACAACTAACCGAA

QA 1 24 1 24
DS VERSION: 1 TIME: Tue Jun 14 09:07:44 2011

RD ILLUMINA-E6F4B9:7:112:15254:3103#0/1 26 0 0
AAATCCAACAACAACTAACCGAAGCA

QA 1 26 1 26
DS VERSION: 1 TIME: Tue Jun 14 09:07:44 2011

RD ILLUMINA-E6F4B9:7:70:17889:21210#0/1 18 0 0
AATCCAACAACAATTAAC

QA 1 18 1 18
DS VERSION: 1 TIME: Tue Jun 14 09:07:44 2011

RD ILLUMINA-E6F4B9:7:117:16914:16789#0/1 24 0 0
TCCAACAACAACTAACCGAAGCAA

QA 1 24 1 24
DS VERSION: 1 TIME: Tue Jun 14 09:07:44 2011

RD ILLUMINA-E6F4B9:7:5:16886:20520#0/1 21 0 0
AACAATTAACCGAAGCAATGG

QA 1 21 1 21
DS VERSION: 1 TIME: Tue Jun 14 09:07:44 2011

RD ILLUMINA-E6F4B9:7:71:15941:1373#0/1 24 0 0
AACAATTAACCGAAGCAATGGATA

QA 1 24 1 24
DS VERSION: 1 TIME: Tue Jun 14 09:07:44 2011

RD ILLUMINA-E6F4B9:7:106:17386:15383#0/1 25 0 0
ACAATTAACCGAAGCAATGGATACT

QA 1 25 1 24
DS VERSION: 1 TIME: Tue Jun 14 09:07:44 2011

RD ILLUMINA-E6F4B9:7:35:5069:12591#0/1 24 0 0
CAACTAACCGAAGCAATGGATACA

QA 1 24 1 24
DS VERSION: 1 TIME: Tue Jun 14 09:07:44 2011

RD ILLUMINA-E6F4B9:7:90:15041:10958#0/1 20 0 0
AATTAACCGAAGCAATGGAT

QA 1 20 1 20
DS VERSION: 1 TIME: Tue Jun 14 09:07:44 2011

RD ILLUMINA-E6F4B9:7:114:8541:21155#0/1 21 0 0
TTAACCGAAGCAATGGATACA

QA 1 21 1 21
DS VERSION: 1 TIME: Tue Jun 14 09:07:44 2011

RD ILLUMINA-E6F4B9:7:89:13707:17197#0/1 23 0 0
AACTAACCGAAGCAATGGATACA

QA 1 23 4 23
DS VERSION: 1 TIME: Tue Jun 14 09:07:44 2011

RD ILLUMINA-E6F4B9:7:17:18719:17309#0/1 23 0 0
ACTAACCGAAGCAATGGATACAT

QA 1 23 3 23
DS VERSION: 1 TIME: Tue Jun 14 09:07:44 2011

RD ILLUMINA-E6F4B9:7:27:3618:4818#0/1 26 0 0
ACTAACCGAAGCAATGGATACATTTA

QA 1 26 3 26
DS VERSION: 1 TIME: Tue Jun 14 09:07:44 2011

RD ILLUMINA-E6F4B9:7:44:13441:17955#0/1 22 0 0
ACTAACCGAAGCAATGGATACA

QA 1 22 3 22
DS VERSION: 1 TIME: Tue Jun 14 09:07:44 2011

RD ILLUMINA-E6F4B9:7:47:9443:20100#0/1 22 0 0
ACTAACCGAAGCAATGGATACA

QA 1 22 3 22
DS VERSION: 1 TIME: Tue Jun 14 09:07:44 2011

RD ILLUMINA-E6F4B9:7:50:6824:12181#0/1 23 0 0
ACTAACCGAAGCAATGGATACAT

QA 1 23 3 23
DS VERSION: 1 TIME: Tue Jun 14 09:07:44 2011

RD ILLUMINA-E6F4B9:7:64:3625:8507#0/1 22 0 0
ACTAACCGAAGCAATGGATACA

QA 1 22 3 22
DS VERSION: 1 TIME: Tue Jun 14 09:07:44 2011

RD ILLUMINA-E6F4B9:7:75:5419:14718#0/1 23 0 0
ACTAACCGAAGCAATGGATACAT

QA 1 23 3 23
DS VERSION: 1 TIME: Tue Jun 14 09:07:44 2011

RD ILLUMINA-E6F4B9:7:104:19629:1341#0/1 22 0 0
ACTAACCGAAGCAATGGATACA

QA 1 22 3 22
DS VERSION: 1 TIME: Tue Jun 14 09:07:44 2011

RD ILLUMINA-E6F4B9:7:114:16606:14545#0/1 25 0 0
ACTAACCGAAGCAATGGATACATTT

QA 1 25 3 25
DS VERSION: 1 TIME: Tue Jun 14 09:07:44 2011

RD ILLUMINA-E6F4B9:7:116:3530:13302#0/1 19 0 0
ACTAACCGAAGCAATGGAT

QA 1 19 3 19
DS VERSION: 1 TIME: Tue Jun 14 09:07:44 2011

RD ILLUMINA-E6F4B9:7:73:14259:20124#0/1 21 0 0
CTAACCGAAGCAATGGATACA

QA 1 21 2 21
DS VERSION: 1 TIME: Tue Jun 14 09:07:44 2011

RD ILLUMINA-E6F4B9:7:82:9350:4067#0/1 21 0 0
CTAACCGAAGCAATGGATACA

QA 1 21 2 21
DS VERSION: 1 TIME: Tue Jun 14 09:07:44 2011

RD ILLUMINA-E6F4B9:7:108:2745:3722#0/1 20 0 0
TAACCGAAGCAATGGATACA

QA 1 20 1 20
DS VERSION: 1 TIME: Tue Jun 14 09:07:44 2011

RD ILLUMINA-E6F4B9:7:35:10523:11350#0/1 22 0 0
AACCGAAGCAATGGATACATTT

QA 1 22 1 22
DS VERSION: 1 TIME: Tue Jun 14 09:07:44 2011

RD ILLUMINA-E6F4B9:7:85:9284:17446#0/1 19 0 0
AACCGAAGCAATGGATACA

QA 1 19 1 19
DS VERSION: 1 TIME: Tue Jun 14 09:07:44 2011

RD ILLUMINA-E6F4B9:7:111:15109:20729#0/1 22 0 0
AACCGAAGCAATGGATACATTT

QA 1 22 1 22
DS VERSION: 1 TIME: Tue Jun 14 09:07:44 2011

RD ILLUMINA-E6F4B9:7:112:11045:6614#0/1 19 0 0
AACCGAAGCAATGGATACA

QA 1 19 1 19
DS VERSION: 1 TIME: Tue Jun 14 09:07:44 2011

RD ILLUMINA-E6F4B9:7:87:14951:12016#0/1 21 0 0
CCGAAGCAATGGATACATTTA

QA 1 21 1 21
DS VERSION: 1 TIME: Tue Jun 14 09:07:44 2011

RD ILLUMINA-E6F4B9:7:68:3045:5768#0/1 19 0 0
AAATAGAGACCCAAATGAC

QA 1 19 1 19
DS VERSION: 1 TIME: Tue Jun 14 09:07:44 2011

RD ILLUMINA-E6F4B9:7:9:2442:1177#0/1 22 0 0
AATAAACAAAAAAGATGCGGAC

QA 1 22 1 22
DS VERSION: 1 TIME: Tue Jun 14 09:07:44 2011

RD ILLUMINA-E6F4B9:7:56:14500:16812#0/1 26 0 0
AATAAACAAAAAAGATGCGGACAACG

QA 1 26 1 26
DS VERSION: 1 TIME: Tue Jun 14 09:07:44 2011

RD ILLUMINA-E6F4B9:7:82:8095:18129#0/1 23 0 0
AATAAACAAAAAAGATGCGGACA

QA 1 23 1 23
DS VERSION: 1 TIME: Tue Jun 14 09:07:44 2011

RD ILLUMINA-E6F4B9:7:107:8944:10363#0/1 23 0 0
AATAAACAAAAAAGATGCGGACA

QA 1 23 1 23
DS VERSION: 1 TIME: Tue Jun 14 09:07:44 2011

RD ILLUMINA-E6F4B9:7:44:15818:11751#0/1 21 0 0
ATAAACAAAAAAGATGCGGAC

QA 1 21 1 21
DS VERSION: 1 TIME: Tue Jun 14 09:07:44 2011

RD ILLUMINA-E6F4B9:7:114:4400:13704#0/1 21 0 0
ATAAACAAAAAAGATGCGGAC

QA 1 21 1 21
DS VERSION: 1 TIME: Tue Jun 14 09:07:44 2011

RD ILLUMINA-E6F4B9:7:95:2840:6311#0/1 20 0 0
TAAACAAAAAAGATGCGGAC

QA 1 20 1 20
DS VERSION: 1 TIME: Tue Jun 14 09:07:44 2011

RD ILLUMINA-E6F4B9:7:101:11739:10583#0/1 20 0 0
TAAACAAAAAAGATGCGGAC

QA 1 20 1 20
DS VERSION: 1 TIME: Tue Jun 14 09:07:44 2011

RD ILLUMINA-E6F4B9:7:12:12310:12390#0/1 28 0 0
AAACAAAAAAGATGCGGACAACGTAAAC

QA 1 28 1 28
DS VERSION: 1 TIME: Tue Jun 14 09:07:44 2011

RD ILLUMINA-E6F4B9:7:12:3196:15549#0/1 20 0 0
AAACAAAAAAGATGCGGACA

QA 1 20 1 20
DS VERSION: 1 TIME: Tue Jun 14 09:07:44 2011

RD ILLUMINA-E6F4B9:7:27:16271:3709#0/1 28 0 0
AAACAAAAAAGATGCGGACAACGTAAAC

QA 1 28 1 28
DS VERSION: 1 TIME: Tue Jun 14 09:07:44 2011

RD ILLUMINA-E6F4B9:7:38:4807:12886#0/1 20 0 0
AAACAAAAAAGATGCGGACA

QA 1 20 1 20
DS VERSION: 1 TIME: Tue Jun 14 09:07:44 2011

RD ILLUMINA-E6F4B9:7:70:15128:14110#0/1 28 0 0
AAACAAAAAAGATGCGGACAACGTAAAC

QA 1 28 1 28
DS VERSION: 1 TIME: Tue Jun 14 09:07:44 2011

RD ILLUMINA-E6F4B9:7:73:15493:12665#0/1 28 0 0
AAACAAAAAAGATGCGGACAACGTAAAC

QA 1 28 1 28
DS VERSION: 1 TIME: Tue Jun 14 09:07:44 2011

RD ILLUMINA-E6F4B9:7:118:19469:3703#0/1 28 0 0
AAACAAAAAAGATGCGGACAACGTAAAC

QA 1 28 1 28
DS VERSION: 1 TIME: Tue Jun 14 09:07:44 2011

RD ILLUMINA-E6F4B9:7:30:4389:19502#0/1 27 0 0
AACAAAAAAGATGCGGACAACGTAAAC

QA 1 27 1 27
DS VERSION: 1 TIME: Tue Jun 14 09:07:44 2011

RD ILLUMINA-E6F4B9:7:34:17848:13191#0/1 27 0 0
AACAAAAAAGATGCGGACAACGTAAAC

QA 1 27 1 27
DS VERSION: 1 TIME: Tue Jun 14 09:07:44 2011

RD ILLUMINA-E6F4B9:7:51:7158:12483#0/1 27 0 0
AACAAAAAAGATGCGGACAACGTAAAC

QA 1 27 1 27
DS VERSION: 1 TIME: Tue Jun 14 09:07:44 2011

RD ILLUMINA-E6F4B9:7:69:17398:11698#0/1 21 0 0
AACAAAAAAGATGCGGACAAC

QA 1 21 1 21
DS VERSION: 1 TIME: Tue Jun 14 09:07:44 2011

RD ILLUMINA-E6F4B9:7:108:10045:7522#0/1 27 0 0
AACAAAAAAGATGCGGACAACGTAAAC

QA 1 27 1 27
DS VERSION: 1 TIME: Tue Jun 14 09:07:44 2011

RD ILLUMINA-E6F4B9:7:5:1662:16137#0/1 26 0 0
ACAAAAAAGATGCGGACAACGTAAAC

QA 1 26 1 26
DS VERSION: 1 TIME: Tue Jun 14 09:07:44 2011

RD ILLUMINA-E6F4B9:7:11:9799:12617#0/1 26 0 0
ACAAAAAAGATGCGGACAACGTAAAC

QA 1 26 1 26
DS VERSION: 1 TIME: Tue Jun 14 09:07:44 2011

RD ILLUMINA-E6F4B9:7:16:12415:9376#0/1 26 0 0
ACAAAAAAGATGCGGACAACGTAAAC

QA 1 26 1 26
DS VERSION: 1 TIME: Tue Jun 14 09:07:44 2011

RD ILLUMINA-E6F4B9:7:58:7235:15797#0/1 26 0 0
ACAAAAAAGATGCGGACAACGTAAAC

QA 1 26 1 26
DS VERSION: 1 TIME: Tue Jun 14 09:07:44 2011

RD ILLUMINA-E6F4B9:7:75:4008:21239#0/1 27 0 0
ACAAAAAAGATGCGGACAACGTAAACA

QA 1 27 1 27
DS VERSION: 1 TIME: Tue Jun 14 09:07:44 2011

RD ILLUMINA-E6F4B9:7:93:9444:7799#0/1 26 0 0
ACAAAAAAGATGCGGACAACGTAAAC

QA 1 26 1 26
DS VERSION: 1 TIME: Tue Jun 14 09:07:44 2011

RD ILLUMINA-E6F4B9:7:99:5754:11764#0/1 26 0 0
ACAAAAAAGATGCGGACAACGTAAAC

QA 1 26 1 26
DS VERSION: 1 TIME: Tue Jun 14 09:07:44 2011

RD ILLUMINA-E6F4B9:7:120:11288:3164#0/1 26 0 0
ACAAAAAAGATGCGGACAACGTAAAC

QA 1 26 1 26
DS VERSION: 1 TIME: Tue Jun 14 09:07:44 2011

RD ILLUMINA-E6F4B9:7:35:11406:18671#0/1 26 0 0
CAAAAAAGATGCGGACAACGTAAACG

QA 1 26 1 25
DS VERSION: 1 TIME: Tue Jun 14 09:07:44 2011

RD ILLUMINA-E6F4B9:7:41:8201:12452#0/1 25 0 0
CAAAAAAGATGCGGACAACGTAAAC

QA 1 25 1 25
DS VERSION: 1 TIME: Tue Jun 14 09:07:44 2011

RD ILLUMINA-E6F4B9:7:79:16196:2556#0/1 25 0 0
CAAAAAAGATGCGGACAACGTAAAC

QA 1 25 1 25
DS VERSION: 1 TIME: Tue Jun 14 09:07:44 2011

RD ILLUMINA-E6F4B9:7:98:13540:14235#0/1 25 0 0
CAAAAAAGATGCGGACAACGTAAAC

QA 1 25 1 25
DS VERSION: 1 TIME: Tue Jun 14 09:07:44 2011

RD ILLUMINA-E6F4B9:7:108:12129:5874#0/1 25 0 0
CAAAAAAGATGCGGACAACGTAAAC

QA 1 25 1 25
DS VERSION: 1 TIME: Tue Jun 14 09:07:44 2011

RD ILLUMINA-E6F4B9:7:115:4281:8221#0/1 25 0 0
CAAAAAAGATGCGGACAACGTAAAC

QA 1 25 1 25
DS VERSION: 1 TIME: Tue Jun 14 09:07:44 2011

RD ILLUMINA-E6F4B9:7:5:14844:6344#0/1 24 0 0
AAAAAAGATGCGGACAACGTAAAC

QA 1 24 1 24
DS VERSION: 1 TIME: Tue Jun 14 09:07:44 2011

RD ILLUMINA-E6F4B9:7:5:8714:13299#0/1 24 0 0
AAAAAAGATGCGGACAACGTAAAC

QA 1 24 1 24
DS VERSION: 1 TIME: Tue Jun 14 09:07:44 2011

RD ILLUMINA-E6F4B9:7:7:9253:2804#0/1 25 0 0
AAAAAAGATGCGGACAACGTAAACA

QA 1 25 1 25
DS VERSION: 1 TIME: Tue Jun 14 09:07:44 2011

RD ILLUMINA-E6F4B9:7:16:6088:19932#0/1 24 0 0
AAAAAAGATGCGGACAACGTAAAC

QA 1 24 1 24
DS VERSION: 1 TIME: Tue Jun 14 09:07:44 2011

RD ILLUMINA-E6F4B9:7:22:3924:13531#0/1 24 0 0
AAAAAAGATGCGGACAACGTAAAC

QA 1 24 1 24
DS VERSION: 1 TIME: Tue Jun 14 09:07:44 2011

RD ILLUMINA-E6F4B9:7:24:9024:14596#0/1 25 0 0
AAAAAAGATGCGGACAACGTAAACA

QA 1 25 1 25
DS VERSION: 1 TIME: Tue Jun 14 09:07:44 2011

RD ILLUMINA-E6F4B9:7:33:17392:13697#0/1 24 0 0
AAAAAAGATGCGGACAACGTAAAC

QA 1 24 1 24
DS VERSION: 1 TIME: Tue Jun 14 09:07:44 2011

RD ILLUMINA-E6F4B9:7:33:8869:16778#0/1 24 0 0
AAAAAAGATGCGGACAACGTAAAC

QA 1 24 1 24
DS VERSION: 1 TIME: Tue Jun 14 09:07:44 2011

RD ILLUMINA-E6F4B9:7:39:17270:2194#0/1 25 0 0
AAAAAAGATGCGGACAACGTAAACA

QA 1 25 1 25
DS VERSION: 1 TIME: Tue Jun 14 09:07:44 2011

RD ILLUMINA-E6F4B9:7:44:15571:8283#0/1 25 0 0
AAAAAAGATGCGGACAACGTAAACG

QA 1 25 1 24
DS VERSION: 1 TIME: Tue Jun 14 09:07:44 2011

RD ILLUMINA-E6F4B9:7:51:16978:8000#0/1 24 0 0
AAAAAAGATGCGGACAACGTAAAC

QA 1 24 1 24
DS VERSION: 1 TIME: Tue Jun 14 09:07:44 2011

RD ILLUMINA-E6F4B9:7:53:12855:9096#0/1 24 0 0
AAAAAAGATGCGGACAACGTAAAC

QA 1 24 1 24
DS VERSION: 1 TIME: Tue Jun 14 09:07:44 2011

RD ILLUMINA-E6F4B9:7:73:13175:10246#0/1 25 0 0
AAAAAAGATGCGGACAACGTAAACA

QA 1 25 1 25
DS VERSION: 1 TIME: Tue Jun 14 09:07:44 2011

RD ILLUMINA-E6F4B9:7:82:7825:1472#0/1 24 0 0
AAAAAAGATGCGGACAACGTAAAC

QA 1 24 1 24
DS VERSION: 1 TIME: Tue Jun 14 09:07:44 2011

RD ILLUMINA-E6F4B9:7:88:12871:7662#0/1 19 0 0
AAAAAAGATGCGGACAACG

QA 1 19 1 19
DS VERSION: 1 TIME: Tue Jun 14 09:07:44 2011

RD ILLUMINA-E6F4B9:7:92:17244:11447#0/1 25 0 0
AAAAAAGATGCGGACAACGTAAACG

QA 1 25 1 24
DS VERSION: 1 TIME: Tue Jun 14 09:07:44 2011

RD ILLUMINA-E6F4B9:7:95:4372:6430#0/1 24 0 0
AAAAAAGATGCGGACAACGTAAAC

QA 1 24 1 24
DS VERSION: 1 TIME: Tue Jun 14 09:07:44 2011

RD ILLUMINA-E6F4B9:7:99:10410:7904#0/1 21 0 0
AAAAAAGATGCGGACAACGTA

QA 1 21 1 21
DS VERSION: 1 TIME: Tue Jun 14 09:07:44 2011

RD ILLUMINA-E6F4B9:7:114:19051:7968#0/1 27 0 0
AAAAAAGATGCGGACAACGTAAACAAC

QA 1 27 1 27
DS VERSION: 1 TIME: Tue Jun 14 09:07:44 2011

RD ILLUMINA-E6F4B9:7:117:7314:19951#0/1 29 0 0
AAAAAAGATGCGGACAACGTAAACAACTC

QA 1 29 1 27
DS VERSION: 1 TIME: Tue Jun 14 09:07:44 2011

RD ILLUMINA-E6F4B9:7:119:2636:20963#0/1 24 0 0
AAAAAAGATGCGGACAACGTAAAC

QA 1 24 1 24
DS VERSION: 1 TIME: Tue Jun 14 09:07:44 2011

RD ILLUMINA-E6F4B9:7:1:12366:21236#0/1 25 0 0
AAAAAGATGCGGACAACGTAAACTC

QA 1 25 1 23
DS VERSION: 1 TIME: Tue Jun 14 09:07:44 2011

RD ILLUMINA-E6F4B9:7:2:8368:6919#0/1 23 0 0
AAAAAGATGCGGACAACGTAAAC

QA 1 23 1 23
DS VERSION: 1 TIME: Tue Jun 14 09:07:44 2011

RD ILLUMINA-E6F4B9:7:2:5398:9484#0/1 23 0 0
AAAAAGATGCGGACAACGTAAAC

QA 1 23 1 23
DS VERSION: 1 TIME: Tue Jun 14 09:07:44 2011

RD ILLUMINA-E6F4B9:7:2:10530:13723#0/1 23 0 0
AAAAAGATGCGGACAACGTAAAC

QA 1 23 1 23
DS VERSION: 1 TIME: Tue Jun 14 09:07:44 2011

RD ILLUMINA-E6F4B9:7:3:16710:15343#0/1 23 0 0
AAAAAGATGCGGACAACGTAAAC

QA 1 23 1 23
DS VERSION: 1 TIME: Tue Jun 14 09:07:44 2011

RD ILLUMINA-E6F4B9:7:4:11670:3791#0/1 23 0 0
AAAAAGATGCGGACAACGTAAAC

QA 1 23 1 23
DS VERSION: 1 TIME: Tue Jun 14 09:07:44 2011

RD ILLUMINA-E6F4B9:7:4:7280:4447#0/1 23 0 0
AAAAAGATGCGGACAACGTAAAC

QA 1 23 1 23
DS VERSION: 1 TIME: Tue Jun 14 09:07:44 2011

RD ILLUMINA-E6F4B9:7:4:18670:9706#0/1 24 0 0
AAAAAGATGCGGACAACGTAAACA

QA 1 24 1 24
DS VERSION: 1 TIME: Tue Jun 14 09:07:44 2011

RD ILLUMINA-E6F4B9:7:4:17676:17243#0/1 23 0 0
AAAAAGATGCGGACAACGTAAAC

QA 1 23 1 23
DS VERSION: 1 TIME: Tue Jun 14 09:07:44 2011

RD ILLUMINA-E6F4B9:7:5:16072:11206#0/1 23 0 0
AAAAAGATGCGGACAACGTAAAC

QA 1 23 1 23
DS VERSION: 1 TIME: Tue Jun 14 09:07:44 2011

RD ILLUMINA-E6F4B9:7:6:19806:1158#0/1 23 0 0
AAAAAGATGCGGACAACGTAAAC

QA 1 23 1 23
DS VERSION: 1 TIME: Tue Jun 14 09:07:44 2011

RD ILLUMINA-E6F4B9:7:6:5855:3927#0/1 23 0 0
AAAAAGATGCGGACAACGTAAAC

QA 1 23 1 23
DS VERSION: 1 TIME: Tue Jun 14 09:07:44 2011

RD ILLUMINA-E6F4B9:7:6:17494:10685#0/1 23 0 0
AAAAAGATGCGGACAACGTAAAC

QA 1 23 1 23
DS VERSION: 1 TIME: Tue Jun 14 09:07:44 2011

RD ILLUMINA-E6F4B9:7:7:17870:2711#0/1 23 0 0
AAAAAGATGCGGACAACGTAAAC

QA 1 23 1 23
DS VERSION: 1 TIME: Tue Jun 14 09:07:44 2011

RD ILLUMINA-E6F4B9:7:8:9548:5108#0/1 24 0 0
AAAAAGATGCGGACAACGTAAACA

QA 1 24 1 24
DS VERSION: 1 TIME: Tue Jun 14 09:07:44 2011

RD ILLUMINA-E6F4B9:7:9:11336:9204#0/1 24 0 0
AAAAAGATGCGGACAACGTAAACA

QA 1 24 1 24
DS VERSION: 1 TIME: Tue Jun 14 09:07:44 2011

RD ILLUMINA-E6F4B9:7:10:9832:3256#0/1 24 0 0
AAAAAGATGCGGACAACGTAAACA

QA 1 24 1 24
DS VERSION: 1 TIME: Tue Jun 14 09:07:44 2011

RD ILLUMINA-E6F4B9:7:10:14390:3917#0/1 23 0 0
AAAAAGATGCGGACAACGTAAAC

QA 1 23 1 23
DS VERSION: 1 TIME: Tue Jun 14 09:07:44 2011

RD ILLUMINA-E6F4B9:7:10:19086:4118#0/1 23 0 0
AAAAAGATGCGGACAACGTAAAC

QA 1 23 1 23
DS VERSION: 1 TIME: Tue Jun 14 09:07:44 2011

RD ILLUMINA-E6F4B9:7:10:6472:11568#0/1 23 0 0
AAAAAGATGCGGACAACGTAAAC

QA 1 23 1 23
DS VERSION: 1 TIME: Tue Jun 14 09:07:44 2011

RD ILLUMINA-E6F4B9:7:17:14508:17302#0/1 24 0 0
AAAAAGATGCGGACAACGTAAACA

QA 1 24 1 24
DS VERSION: 1 TIME: Tue Jun 14 09:07:44 2011

RD ILLUMINA-E6F4B9:7:20:3976:7053#0/1 23 0 0
AAAAAGATGCGGACAACGTAAAC

QA 1 23 1 23
DS VERSION: 1 TIME: Tue Jun 14 09:07:44 2011

RD ILLUMINA-E6F4B9:7:22:17212:13806#0/1 26 0 0
AAAAAGATGCGGACAACGTAAACAAC

QA 1 26 1 26
DS VERSION: 1 TIME: Tue Jun 14 09:07:44 2011

RD ILLUMINA-E6F4B9:7:22:8253:17146#0/1 24 0 0
AAAAAGATGCGGACAACGTAAACA

QA 1 24 1 24
DS VERSION: 1 TIME: Tue Jun 14 09:07:44 2011

RD ILLUMINA-E6F4B9:7:24:14325:3336#0/1 24 0 0
AAAAAGATGCGGACAACGTAAACA

QA 1 24 1 24
DS VERSION: 1 TIME: Tue Jun 14 09:07:44 2011

RD ILLUMINA-E6F4B9:7:24:3060:13577#0/1 23 0 0
AAAAAGATGCGGACAACGTAAAC

QA 1 23 1 23
DS VERSION: 1 TIME: Tue Jun 14 09:07:44 2011

RD ILLUMINA-E6F4B9:7:26:19077:16229#0/1 24 0 0
AAAAAGATGCGGACAACGTAAACA

QA 1 24 1 24
DS VERSION: 1 TIME: Tue Jun 14 09:07:44 2011

RD ILLUMINA-E6F4B9:7:28:2446:3982#0/1 23 0 0
AAAAAGATGCGGACAACGTAAAC

QA 1 23 1 23
DS VERSION: 1 TIME: Tue Jun 14 09:07:44 2011

RD ILLUMINA-E6F4B9:7:29:2012:5274#0/1 23 0 0
AAAAAGATGCGGACAACGTAAAC

QA 1 23 1 23
DS VERSION: 1 TIME: Tue Jun 14 09:07:44 2011

RD ILLUMINA-E6F4B9:7:31:18569:10060#0/1 24 0 0
AAAAAGATGCGGACAACGTAAACA

QA 1 24 1 24
DS VERSION: 1 TIME: Tue Jun 14 09:07:44 2011

RD ILLUMINA-E6F4B9:7:34:2776:10450#0/1 26 0 0
AAAAAGATGCGGACAACGTAAACAAC

QA 1 26 1 26
DS VERSION: 1 TIME: Tue Jun 14 09:07:44 2011

RD ILLUMINA-E6F4B9:7:34:11021:10933#0/1 23 0 0
AAAAAGATGCGGACAACGTAAAC

QA 1 23 1 23
DS VERSION: 1 TIME: Tue Jun 14 09:07:44 2011

RD ILLUMINA-E6F4B9:7:34:8260:18907#0/1 27 0 0
AAAAAGATGCGGAAAACGTAAACAACA

QA 1 27 1 27
DS VERSION: 1 TIME: Tue Jun 14 09:07:44 2011

RD ILLUMINA-E6F4B9:7:40:3172:12047#0/1 23 0 0
AAAAAGATGCGGACAACGTAAAC

QA 1 23 1 23
DS VERSION: 1 TIME: Tue Jun 14 09:07:44 2011

RD ILLUMINA-E6F4B9:7:40:19709:18882#0/1 24 0 0
AAAAAGATGCGGACAACGTAAACA

QA 1 24 1 24
DS VERSION: 1 TIME: Tue Jun 14 09:07:44 2011

RD ILLUMINA-E6F4B9:7:42:15390:17710#0/1 23 0 0
AAAAAGATGCGGACAACGTAAAC

QA 1 23 1 23
DS VERSION: 1 TIME: Tue Jun 14 09:07:44 2011

RD ILLUMINA-E6F4B9:7:44:13099:8962#0/1 23 0 0
AAAAAGATGCGGACAACGTAAAC

QA 1 23 1 23
DS VERSION: 1 TIME: Tue Jun 14 09:07:44 2011

RD ILLUMINA-E6F4B9:7:44:6986:18804#0/1 27 0 0
AAAAAGATGCGGACAACGTAAACAACA

QA 1 27 1 27
DS VERSION: 1 TIME: Tue Jun 14 09:07:44 2011

RD ILLUMINA-E6F4B9:7:45:13002:1102#0/1 20 0 0
AAAAAGATGCGGACAACGTA

QA 1 20 1 20
DS VERSION: 1 TIME: Tue Jun 14 09:07:44 2011

RD ILLUMINA-E6F4B9:7:45:11358:6924#0/1 23 0 0
AAAAAGATGCGGACAACGTAAAC

QA 1 23 1 23
DS VERSION: 1 TIME: Tue Jun 14 09:07:44 2011

RD ILLUMINA-E6F4B9:7:45:5706:20979#0/1 23 0 0
AAAAAGATGCGGACAACGTAAAC

QA 1 23 1 23
DS VERSION: 1 TIME: Tue Jun 14 09:07:44 2011

RD ILLUMINA-E6F4B9:7:47:12666:8309#0/1 27 0 0
AAAAAGATGCGGACAACGTAAACAACA

QA 1 27 1 27
DS VERSION: 1 TIME: Tue Jun 14 09:07:44 2011

RD ILLUMINA-E6F4B9:7:48:5308:8048#0/1 23 0 0
AAAAAGATGCGGACAACGTAAAC

QA 1 23 1 23
DS VERSION: 1 TIME: Tue Jun 14 09:07:44 2011

RD ILLUMINA-E6F4B9:7:50:6697:21089#0/1 23 0 0
AAAAAGATGCGGACAACGTAAAC

QA 1 23 1 23
DS VERSION: 1 TIME: Tue Jun 14 09:07:44 2011

RD ILLUMINA-E6F4B9:7:52:3513:16699#0/1 24 0 0
AAAAAGATGCGGACAACGTAAACG

QA 1 24 1 23
DS VERSION: 1 TIME: Tue Jun 14 09:07:44 2011

RD ILLUMINA-E6F4B9:7:52:15298:17474#0/1 23 0 0
AAAAAGATGCGGACAACGTAAAC

QA 1 23 1 23
DS VERSION: 1 TIME: Tue Jun 14 09:07:44 2011

RD ILLUMINA-E6F4B9:7:55:5013:3024#0/1 23 0 0
AAAAAGATGCGGACAACGTAAAC

QA 1 23 1 23
DS VERSION: 1 TIME: Tue Jun 14 09:07:44 2011

RD ILLUMINA-E6F4B9:7:55:15180:6844#0/1 23 0 0
AAAAAGATGCGGACAACGTAAAC

QA 1 23 1 23
DS VERSION: 1 TIME: Tue Jun 14 09:07:44 2011

RD ILLUMINA-E6F4B9:7:55:13979:14854#0/1 23 0 0
AAAAAGATGCGGACAACGTAAAC

QA 1 23 1 23
DS VERSION: 1 TIME: Tue Jun 14 09:07:44 2011

RD ILLUMINA-E6F4B9:7:56:14550:10051#0/1 23 0 0
AAAAAGATGCGGACAACGTAAAC

QA 1 23 1 23
DS VERSION: 1 TIME: Tue Jun 14 09:07:44 2011

RD ILLUMINA-E6F4B9:7:59:18854:9982#0/1 24 0 0
AAAAAGATGCGGACAACGTAAACA

QA 1 24 1 24
DS VERSION: 1 TIME: Tue Jun 14 09:07:44 2011

RD ILLUMINA-E6F4B9:7:62:9475:18737#0/1 23 0 0
AAAAAGATGCGGACAACGTAAAC

QA 1 23 1 23
DS VERSION: 1 TIME: Tue Jun 14 09:07:44 2011

RD ILLUMINA-E6F4B9:7:63:17119:10910#0/1 23 0 0
AAAAAGATGCGGACAACGTAAAC

QA 1 23 1 23
DS VERSION: 1 TIME: Tue Jun 14 09:07:44 2011

RD ILLUMINA-E6F4B9:7:63:16861:11115#0/1 23 0 0
AAAAAGATGCGGACAACGTAAAC

QA 1 23 1 23
DS VERSION: 1 TIME: Tue Jun 14 09:07:44 2011

RD ILLUMINA-E6F4B9:7:64:18554:7680#0/1 27 0 0
AAAAAGATGCGGACAACGTAAACAACA

QA 1 27 1 27
DS VERSION: 1 TIME: Tue Jun 14 09:07:44 2011

RD ILLUMINA-E6F4B9:7:64:5228:17408#0/1 26 0 0
AAAAAGATGCGGACAACGTAAACAAC

QA 1 26 1 26
DS VERSION: 1 TIME: Tue Jun 14 09:07:44 2011

RD ILLUMINA-E6F4B9:7:66:1919:17691#0/1 27 0 0
AAAATGATGCGGACAACGTAAACAACA

QA 1 27 1 27
DS VERSION: 1 TIME: Tue Jun 14 09:07:44 2011

RD ILLUMINA-E6F4B9:7:70:9925:17617#0/1 24 0 0
AAAAAGATGCGGACAACGTAAACA

QA 1 24 1 24
DS VERSION: 1 TIME: Tue Jun 14 09:07:44 2011

RD ILLUMINA-E6F4B9:7:72:11250:6585#0/1 27 0 0
AAAAAGATGCGGACAACGTAAACAACG

QA 1 27 1 26
DS VERSION: 1 TIME: Tue Jun 14 09:07:44 2011

RD ILLUMINA-E6F4B9:7:72:9907:14713#0/1 23 0 0
AAAAAGATGCGGACAACGTAAAC

QA 1 23 1 23
DS VERSION: 1 TIME: Tue Jun 14 09:07:44 2011

RD ILLUMINA-E6F4B9:7:72:2440:16596#0/1 23 0 0
AAAAAGATGCGGACAACGTAAAC

QA 1 23 1 23
DS VERSION: 1 TIME: Tue Jun 14 09:07:44 2011

RD ILLUMINA-E6F4B9:7:74:9993:18045#0/1 25 0 0
AAAAAGATGCGGACAACGTAAACAA

QA 1 25 1 25
DS VERSION: 1 TIME: Tue Jun 14 09:07:44 2011

RD ILLUMINA-E6F4B9:7:75:18690:5433#0/1 23 0 0
AAAAAGATGCGGACAACGTAAAC

QA 1 23 1 23
DS VERSION: 1 TIME: Tue Jun 14 09:07:44 2011

RD ILLUMINA-E6F4B9:7:76:7311:5301#0/1 26 0 0
AAAAAGATGCGGACAACGTAAACAAC

QA 1 26 1 26
DS VERSION: 1 TIME: Tue Jun 14 09:07:44 2011

RD ILLUMINA-E6F4B9:7:76:3316:14979#0/1 27 0 0
AAAAAGATGCGGACAACGTAAACAACA

QA 1 27 1 27
DS VERSION: 1 TIME: Tue Jun 14 09:07:44 2011

RD ILLUMINA-E6F4B9:7:77:14120:6011#0/1 26 0 0
AAAAAGATGCGGACAACGTAAACAAC

QA 1 26 1 26
DS VERSION: 1 TIME: Tue Jun 14 09:07:44 2011

RD ILLUMINA-E6F4B9:7:77:12157:16647#0/1 26 0 0
AAAAAGATGCGGACAACGTAAACAAC

QA 1 26 1 26
DS VERSION: 1 TIME: Tue Jun 14 09:07:44 2011

RD ILLUMINA-E6F4B9:7:79:4348:9142#0/1 27 0 0
AAAAAGATGCGGACAACGTAAACAACG

QA 1 27 1 26
DS VERSION: 1 TIME: Tue Jun 14 09:07:44 2011

RD ILLUMINA-E6F4B9:7:79:13065:20972#0/1 23 0 0
AAAAAGATGCGGACAACGTAAAC

QA 1 23 1 23
DS VERSION: 1 TIME: Tue Jun 14 09:07:44 2011

RD ILLUMINA-E6F4B9:7:80:17274:15438#0/1 24 0 0
AAAAAGATGCGGACAACGTAAACA

QA 1 24 1 24
DS VERSION: 1 TIME: Tue Jun 14 09:07:44 2011

RD ILLUMINA-E6F4B9:7:83:11524:7193#0/1 23 0 0
AAAAAGATGCGGACAACGTAAAC

QA 1 23 1 23
DS VERSION: 1 TIME: Tue Jun 14 09:07:44 2011

RD ILLUMINA-E6F4B9:7:83:19457:13015#0/1 23 0 0
AAAAAGATGCGGACAACGTAAAC

QA 1 23 1 23
DS VERSION: 1 TIME: Tue Jun 14 09:07:44 2011

RD ILLUMINA-E6F4B9:7:84:17716:4516#0/1 24 0 0
AAAAAGATGCGGACAACGTAAACA

QA 1 24 1 24
DS VERSION: 1 TIME: Tue Jun 14 09:07:44 2011

RD ILLUMINA-E6F4B9:7:84:17064:8484#0/1 23 0 0
AAAAAGATGCGGACAGCGTAAAC

QA 1 23 1 23
DS VERSION: 1 TIME: Tue Jun 14 09:07:44 2011

RD ILLUMINA-E6F4B9:7:84:9038:10247#0/1 23 0 0
AAAAAGATGCGGACAACGTAAAC

QA 1 23 1 23
DS VERSION: 1 TIME: Tue Jun 14 09:07:44 2011

RD ILLUMINA-E6F4B9:7:87:14720:13791#0/1 22 0 0
AAAAAGATGCGGACAACGTAAA

QA 1 22 1 22
DS VERSION: 1 TIME: Tue Jun 14 09:07:44 2011

RD ILLUMINA-E6F4B9:7:88:5265:5090#0/1 23 0 0
AAAAAGATGCGGACAACGTAAAC

QA 1 23 1 23
DS VERSION: 1 TIME: Tue Jun 14 09:07:44 2011

RD ILLUMINA-E6F4B9:7:88:5174:11707#0/1 24 0 0
AAAAAGATGCGGACAACGTAAACG

QA 1 24 1 23
DS VERSION: 1 TIME: Tue Jun 14 09:07:44 2011

RD ILLUMINA-E6F4B9:7:91:15014:12268#0/1 23 0 0
AAAAAGATGCGGACAACGTAAAC

QA 1 23 1 23
DS VERSION: 1 TIME: Tue Jun 14 09:07:44 2011

RD ILLUMINA-E6F4B9:7:92:1824:7323#0/1 23 0 0
AAAAAGATGCGGACAACGTAAAC

QA 1 23 1 23
DS VERSION: 1 TIME: Tue Jun 14 09:07:44 2011

RD ILLUMINA-E6F4B9:7:94:18988:4108#0/1 24 0 0
AAAAAGATGCGGACAACGTAAACA

QA 1 24 1 24
DS VERSION: 1 TIME: Tue Jun 14 09:07:44 2011

RD ILLUMINA-E6F4B9:7:97:16590:2779#0/1 23 0 0
AAAAAGATGCGGACAACGTAAAC

QA 1 23 1 23
DS VERSION: 1 TIME: Tue Jun 14 09:07:44 2011

RD ILLUMINA-E6F4B9:7:97:1263:8601#0/1 24 0 0
AAAAAGATGCGGACAACGTAAACT

QA 1 24 1 23
DS VERSION: 1 TIME: Tue Jun 14 09:07:44 2011

RD ILLUMINA-E6F4B9:7:103:5308:8520#0/1 27 0 0
AAAAAGATGCGGACAACGTAAACAACG

QA 1 27 1 26
DS VERSION: 1 TIME: Tue Jun 14 09:07:44 2011

RD ILLUMINA-E6F4B9:7:103:14563:13241#0/1 23 0 0
AAAAAGATGCGGACAACGTAAAC

QA 1 23 1 23
DS VERSION: 1 TIME: Tue Jun 14 09:07:44 2011

RD ILLUMINA-E6F4B9:7:103:4624:21111#0/1 24 0 0
AAAAAGATCCGGACAACGTAAACA

QA 1 24 1 24
DS VERSION: 1 TIME: Tue Jun 14 09:07:44 2011

RD ILLUMINA-E6F4B9:7:104:19164:1637#0/1 23 0 0
AAAAAGATGCGGACAACGTAAAC

QA 1 23 1 23
DS VERSION: 1 TIME: Tue Jun 14 09:07:44 2011

RD ILLUMINA-E6F4B9:7:106:15561:3057#0/1 23 0 0
AAAAAGATGCGGACAACGTAAAC

QA 1 23 1 23
DS VERSION: 1 TIME: Tue Jun 14 09:07:44 2011

RD ILLUMINA-E6F4B9:7:106:19175:12191#0/1 23 0 0
AAAAAGATGCGGACAACGTAAAC

QA 1 23 1 23
DS VERSION: 1 TIME: Tue Jun 14 09:07:44 2011

RD ILLUMINA-E6F4B9:7:108:17370:2632#0/1 27 0 0
AAAAAGATGCGGACAACGAAAACAACA

QA 1 27 1 27
DS VERSION: 1 TIME: Tue Jun 14 09:07:44 2011

RD ILLUMINA-E6F4B9:7:108:1871:8048#0/1 27 0 0
AAAAAGATGCGGACAACGTAACCAACA

QA 1 27 1 27
DS VERSION: 1 TIME: Tue Jun 14 09:07:44 2011

RD ILLUMINA-E6F4B9:7:109:16920:3879#0/1 24 0 0
AAAAAGATGCGGACAACGTAAACA

QA 1 24 1 24
DS VERSION: 1 TIME: Tue Jun 14 09:07:44 2011

RD ILLUMINA-E6F4B9:7:109:4156:14550#0/1 23 0 0
AAAAAGATGCGGACAACGTAAAC

QA 1 23 1 23
DS VERSION: 1 TIME: Tue Jun 14 09:07:44 2011

RD ILLUMINA-E6F4B9:7:110:6126:12244#0/1 24 0 0
AAAAAGATGCGGACAACGTAAACA

QA 1 24 1 24
DS VERSION: 1 TIME: Tue Jun 14 09:07:44 2011

RD ILLUMINA-E6F4B9:7:110:6448:16601#0/1 23 0 0
AAAAAGATGCGGACAACGTAAAC

QA 1 23 1 23
DS VERSION: 1 TIME: Tue Jun 14 09:07:44 2011

RD ILLUMINA-E6F4B9:7:110:11616:17541#0/1 23 0 0
AAAAAGATGCGGACAACGTAAAC

QA 1 23 1 23
DS VERSION: 1 TIME: Tue Jun 14 09:07:44 2011

RD ILLUMINA-E6F4B9:7:111:19820:12377#0/1 23 0 0
AAAAAGATGCGGACAACGTAAAC

QA 1 23 1 23
DS VERSION: 1 TIME: Tue Jun 14 09:07:44 2011

RD ILLUMINA-E6F4B9:7:113:1449:8104#0/1 24 0 0
AAAAAGATGCAGACAACGTAAACA

QA 1 24 1 24
DS VERSION: 1 TIME: Tue Jun 14 09:07:44 2011

RD ILLUMINA-E6F4B9:7:113:2956:8181#0/1 23 0 0
AAAAAGATGCGGACAACGTAAAC

QA 1 23 1 23
DS VERSION: 1 TIME: Tue Jun 14 09:07:44 2011

RD ILLUMINA-E6F4B9:7:113:4578:14646#0/1 23 0 0
AAAAAGATGCGGACAACGTAAAC

QA 1 23 1 23
DS VERSION: 1 TIME: Tue Jun 14 09:07:44 2011

RD ILLUMINA-E6F4B9:7:113:18067:19972#0/1 23 0 0
AAAAAGATGCGGACAACGTAAAC

QA 1 23 1 23
DS VERSION: 1 TIME: Tue Jun 14 09:07:44 2011

RD ILLUMINA-E6F4B9:7:118:19037:7475#0/1 24 0 0
AAAAAGATGCGGCCAACGTAAACA

QA 1 24 1 24
DS VERSION: 1 TIME: Tue Jun 14 09:07:44 2011

RD ILLUMINA-E6F4B9:7:119:13189:8088#0/1 23 0 0
AAAAAGATGCGGACAACGTAAAC

QA 1 23 1 23
DS VERSION: 1 TIME: Tue Jun 14 09:07:44 2011

RD ILLUMINA-E6F4B9:7:120:12241:2775#0/1 24 0 0
AAAAAGATGCGGACAACGTAAACA

QA 1 24 1 24
[truncated: 408,697 more chars]
